# Supplementary material for: Genome-wide analysis of signaling networks regulating fatty acid–induced gene expression and organelle biogenesis
Source: PubMed Central journal article supplement — J Cell Biol. 2008 Apr 21;181(2):281–92. doi: 10.1083/jcb.200710009 (PMC2315675; doi:10.1083/jcb.200710009), 2008-04-21
Supplement: jcellbiol_jcb.200710009_4.pdf [file jcellbiol_jcb.200710009_4.pdf]

Table S1. **FACS analysis of Pot1p-GFP in signaling molecule deletion strains in glucose, 6-h glycerol, 3-h oleate, and 6-h oleate**

A. Glucose

| <b>Standard name</b> | <b>Systematic name</b> | <b>Glucose</b> | <b>SD</b> | <b>Z value</b> |
|----------------------|------------------------|----------------|-----------|----------------|
| cax4                 | YGR036C                | 8.87           | 1.12      | 6.23           |
| ssn3                 | YPL042C                | 8.02           | 3.23      | 5.33           |
| elm1                 | YKL048C                | 7.95           | 0.62      | 5.27           |
| hrr25                | YPL204W                | 7.65           | 0.27      | 4.96           |
| pho85                | YPL031C                | 7.1            | 0.06      | 4.38           |
| dbf2                 | YGR092W                | 6.65           | 1.25      | 3.91           |
| ctk1                 | YKL139W                | 5.65           | 0.47      | 2.87           |
| yck3                 | YER123W                | 5.59           | 1.31      | 2.8            |
| bck2                 | YER167W                | 5.28           | 1.03      | 2.49           |
| bud32                | YGR262C                | 5.04           | 0.05      | 2.24           |
| ctk3                 | YML112W                | 4.63           | 0.92      | 1.81           |
| by4742               | by4742                 | 4.48           | 0.86      | 1.66           |
| kin3                 | YAR018C                | 4.47           | 0.24      | 1.65           |
| adk1                 | YDR226W                | 4.44           | 0.09      | 1.61           |
| vps15                | YBR097W                | 4.41           | 1.1       | 1.58           |
| gin4                 | YDR507C                | 4.22           | 0.72      | 1.39           |
| cln3                 | YAL040C                | 4.01           | 0.76      | 1.16           |
| cdc19                | YAL038W                | 3.94           | 0.49      | 1.09           |
| cla4                 | YNL298W                | 3.77           | 0.44      | 0.91           |
| sit4                 | YDL047W                | 3.7            | 0.73      | 0.84           |
| ypk1                 | YKL126W                | 3.67           | 0.21      | 0.81           |
| pph21                | YDL134C                | 3.62           | 0.45      | 0.76           |
| pro1                 | YDR300C                | 3.51           | 0.81      | 0.64           |
| ssk1                 | YLR006C                | 3.42           | 0.43      | 0.55           |
| rts1                 | YOR014W                | 3.36           | 0.07      | 0.49           |
| fab1                 | YFR019W                | 3.36           | 0.38      | 0.48           |
| tpd3                 | YAL016W                | 3.3            | 2.5       | 0.43           |
| hsl1                 | YKL101W                | 3.3            | 0.35      | 0.42           |
| tps2                 | YDR074W                | 3.3            | 0.3       | 0.42           |
| sfk1                 | YKL051W                | 3.3            | 0.35      | 0.42           |
| ark1                 | YNL020C                | 3.29           | 0.08      | 0.41           |
| pph3                 | YDR075W                | 3.28           | 0.38      | 0.4            |
| ssk22                | YCR073C                | 3.23           | 0.51      | 0.35           |
| hec1                 | YIL144W                | 3.22           | 0.49      | 0.34           |
| ssu72                | YNL222W                | 3.2            | 0.12      | 0.32           |
| dig1                 | YPL049C                | 3.2            | 0.27      | 0.32           |
| snf1                 | YDR477W                | 3.19           | 0.38      | 0.31           |
| kcc4                 | YCL024W                | 3.19           | 0.54      | 0.31           |
| yck1                 | YHR135C                | 3.18           | 0.27      | 0.3            |

|         |         |      |      |      |
|---------|---------|------|------|------|
| dpp1    | YDR284C | 3.18 | 0.33 | 0.3  |
| hom3    | YER052C | 3.17 | 0.61 | 0.29 |
| his2    | YFR025C | 3.17 | 0.28 | 0.29 |
| cdc15   | YAR019C | 3.17 | 0.16 | 0.29 |
| gcn20   | YFR009W | 3.15 | 0.35 | 0.27 |
| lsp1    | YPL004C | 3.15 | 0.43 | 0.26 |
| kns1    | YLL019C | 3.15 | 0.47 | 0.26 |
| dun1    | YDL101C | 3.14 | 0.24 | 0.26 |
| sap190  | YKR028W | 3.12 | 0.43 | 0.24 |
| akl1    | YBR059C | 3.12 | 0.41 | 0.24 |
| ptp3    | YER075C | 3.12 | 0.38 | 0.24 |
| cak1    | YFL029C | 3.11 | 0.02 | 0.23 |
| chk1    | YBR274W | 3.09 | 0.27 | 0.21 |
| hnt1    | YDL125C | 3.08 | 0.31 | 0.2  |
| pcl6    | YER059W | 3.07 | 0.45 | 0.19 |
| kin82   | YCR091W | 3.07 | 0.46 | 0.19 |
| dbf4    | YDR052C | 3.05 | 0.33 | 0.16 |
| ptc1    | YDL006W | 3.03 | 0.17 | 0.14 |
| adk2    | YER170W | 3.02 | 0.26 | 0.13 |
| ydl025c | ydl025c | 3.01 | 0.29 | 0.13 |
| sip1    | YDR422C | 3.01 | 0.52 | 0.13 |
| apm3    | YBR288C | 3.01 | 0.41 | 0.12 |
| yer134c | yer134c | 3.01 | 0.25 | 0.12 |
| tos3    | YGL179C | 2.99 | 0.24 | 0.1  |
| sac1    | YKL212W | 2.99 | 0.42 | 0.1  |
| vhs3    | YOR054C | 2.99 | 0.06 | 0.1  |
| arg82   | YDR173C | 2.98 | 0.51 | 0.09 |
| ycr079w | ycr079w | 2.98 | 0.33 | 0.09 |
| pph2    | YDL134C | 2.98 | 0.32 | 0.09 |
| pcl9    | YDL179W | 2.97 | 0.27 | 0.08 |
| alk1    | YGL021W | 2.97 | 0.28 | 0.08 |
| prr1    | YKL116C | 2.96 | 0.43 | 0.07 |
| sat4    | YCR008W | 2.96 | 0.35 | 0.07 |
| psk1    | YAL017W | 2.95 | 0.33 | 0.06 |
| mkk1    | YOR231W | 2.95 | 0.49 | 0.06 |
| pho8    | YDR481C | 2.95 | 0.38 | 0.06 |
| fus3    | YBL016W | 2.94 | 0.39 | 0.05 |
| rck1    | YGL158W | 2.93 | 0.16 | 0.04 |
| pho3    | YBR092C | 2.92 | 0.49 | 0.03 |
| sok1    | YDR006C | 2.92 | 0.48 | 0.03 |
| ppm1    | YDR435C | 2.91 | 0.26 | 0.02 |
| lpp1    | YDR503C | 2.91 | 0.3  | 0.01 |
| glc8    | YMR311C | 2.91 | 0.15 | 0.01 |

|         |         |      |      |       |
|---------|---------|------|------|-------|
| eki1    | YDR147W | 2.91 | 0.25 | 0.01  |
| yak1    | YJL141C | 2.88 | 0.19 | -0.01 |
| pps1    | YBR276C | 2.88 | 0.36 | -0.01 |
| pex3    | YDR329C | 2.87 | 0.27 | -0.02 |
| snf4    | YGL115W | 2.86 | 0.3  | -0.03 |
| ckb1    | YGL019W | 2.86 | 0.24 | -0.03 |
| prr2    | YDL214C | 2.86 | 0.14 | -0.03 |
| kin1    | YDR122W | 2.86 | 0.25 | -0.04 |
| scy1    | YGL083W | 2.85 | 0.42 | -0.05 |
| rbs1    | YDL189W | 2.85 | 0.45 | -0.05 |
| mrk1    | YDL079C | 2.84 | 0.43 | -0.05 |
| ybr028c | ybr028c | 2.84 | 0.15 | -0.05 |
| dak2    | YFL053W | 2.84 | 0.25 | -0.05 |
| dig2    | YDR480W | 2.84 | 0.26 | -0.06 |
| cmk1    | YFR014C | 2.83 | 0.23 | -0.06 |
| ptc2    | YER089C | 2.82 | 0.41 | -0.07 |
| kin28   | YDL108W | 2.82 | 0.2  | -0.08 |
| atg1    | YGL180W | 2.82 | 0.25 | -0.08 |
| ado1    | YJR105W | 2.82 | 0.02 | -0.08 |
| ste7    | YDL159W | 2.81 | 0.17 | -0.09 |
| pho5    | YBR093C | 2.8  | 0.38 | -0.1  |
| ptc4    | YBR125C | 2.79 | 0.21 | -0.1  |
| cln1    | YMR199W | 2.79 | 0.02 | -0.1  |
| met14   | YKL001C | 2.79 | 0.09 | -0.11 |
| pkh1    | YDR490C | 2.79 | 0.25 | -0.11 |
| pkh3    | YDR466W | 2.78 | 0.3  | -0.12 |
| mps1    | YDL028C | 2.76 | 0.35 | -0.13 |
| reg1    | YDR028C | 2.76 | 0.31 | -0.14 |
| ypr161c | ypr161c | 2.76 | 0.03 | -0.14 |
| ppz2    | YDR436W | 2.75 | 0.09 | -0.15 |
| ppz1    | YML016C | 2.75 | 0.09 | -0.15 |
| reg2    | YBR050C | 2.74 | 0.28 | -0.16 |
| sho1    | YER118C | 2.74 | 0.23 | -0.16 |
| pak1    | YER129W | 2.74 | 0.24 | -0.16 |
| gcn2    | YDR283C | 2.73 | 0.24 | -0.17 |
| cki1    | YLR133W | 2.73 | 0.25 | -0.17 |
| dog1    | YHR044C | 2.72 | 0.29 | -0.18 |
| hor2    | YER062C | 2.72 | 0.19 | -0.18 |
| ptk1    | YKL198C | 2.7  | 0.23 | -0.2  |
| mec1    | YBR136W | 2.7  | 0.07 | -0.2  |
| ppe1    | YHR075C | 2.7  | 0.28 | -0.2  |
| gal83   | YER027C | 2.69 | 0.37 | -0.21 |
| hdg1    | YLR113W | 2.69 | 0.35 | -0.21 |

|         |         |      |      |       |
|---------|---------|------|------|-------|
| ptp1    | YDL230W | 2.69 | 0.29 | -0.21 |
| tps3    | YMR261C | 2.67 | 0.08 | -0.23 |
| rio1    | YOR119C | 2.66 | 0.06 | -0.25 |
| hal5    | YJL165C | 2.66 | 0.25 | -0.25 |
| ptc5    | YOR090C | 2.65 | 0.02 | -0.25 |
| erg12   | YMR208W | 2.65 | 0.02 | -0.26 |
| cdc5    | YMR001C | 2.65 | 0.06 | -0.26 |
| arg5.6  | YER069W | 2.64 | 0.18 | -0.27 |
| kin2    | YLR096W | 2.63 | 0.2  | -0.27 |
| cka2    | YOR061W | 2.63 | 0.02 | -0.27 |
| ppg1    | YNR032W | 2.63 | 0.21 | -0.28 |
| tel1    | YBL088C | 2.62 | 0.62 | -0.28 |
| ypk2    | YMR104C | 2.62 | 0.25 | -0.29 |
| pcl1    | YNL289W | 2.62 | 0.06 | -0.29 |
| utr1    | YJR049C | 2.6  | 0.27 | -0.3  |
| sks1    | YPL026C | 2.6  | 0.03 | -0.3  |
| cbk1    | YNL161W | 2.57 | 0.09 | -0.34 |
| ygr205w | ygr205w | 2.57 | 0.01 | -0.34 |
| ire1    | YHR079C | 2.56 | 0.32 | -0.35 |
| cka1    | YIL035C | 2.55 | 0.08 | -0.35 |
| bck1    | YJL095W | 2.55 | 0.17 | -0.36 |
| hxx2    | YGL253W | 2.54 | 0.17 | -0.37 |
| lcb3    | YJL134W | 2.53 | 0.29 | -0.37 |
| ste20   | YHL007C | 2.53 | 0.03 | -0.37 |
| lsb6    | YJL100W | 2.53 | 0.06 | -0.37 |
| lcb5    | YLR260W | 2.53 | 0.02 | -0.38 |
| ptp2    | YOR208W | 2.51 | 0.03 | -0.39 |
| bro1    | YPL084W | 2.51 | 0.12 | -0.4  |
| psr1    | YLL010C | 2.5  | 0.13 | -0.4  |
| prk1    | YIL095W | 2.49 | 0.03 | -0.42 |
| stt4    | YLR305C | 2.49 | 0.03 | -0.42 |
| spl2    | YHR136C | 2.49 | 0.16 | -0.42 |
| ypl150w | ypl150w | 2.49 | 0.2  | -0.42 |
| sdp1    | YIL113W | 2.48 | 0.07 | -0.43 |
| pbs2    | YJL128C | 2.48 | 0.03 | -0.43 |
| sln1    | YIL147C | 2.47 | 0.06 | -0.44 |
| ykl171w | ykl171w | 2.46 | 0.1  | -0.45 |
| tpp1    | YMR156C | 2.45 | 0.03 | -0.46 |
| psr2    | YLR019W | 2.45 | 0.03 | -0.46 |
| inp51   | YIL002C | 2.45 | 0.02 | -0.46 |
| pip2    | YOR363C | 2.45 | 0.01 | -0.46 |
| ime2    | YJL106W | 2.44 | 0.16 | -0.47 |
| ppq1    | YPL179W | 2.44 | 0.03 | -0.47 |

|         |         |      |      |       |
|---------|---------|------|------|-------|
| kin4    | YOR233W | 2.44 | 0.09 | -0.47 |
| dak1    | YML070W | 2.44 | 0.11 | -0.47 |
| thi22   | YPR121W | 2.43 | 0.1  | -0.48 |
| phr2    | YIL053W | 2.43 | 0.08 | -0.48 |
| sch9    | YHR205W | 2.42 | 0.12 | -0.49 |
| pos5    | YPL188W | 2.42 | 0.21 | -0.49 |
| tpk1    | YJL164C | 2.42 | 0.16 | -0.5  |
| tor2    | YKL203C | 2.42 | 0.14 | -0.5  |
| thi21   | YPL258C | 2.42 | 0.01 | -0.5  |
| rrd1    | YIL153W | 2.42 | 0.21 | -0.5  |
| tsl1    | YML100W | 2.41 | 0.15 | -0.5  |
| rck2    | YLR248W | 2.41 | 0.05 | -0.5  |
| kkq8    | YKL168C | 2.41 | 0.14 | -0.5  |
| ser2    | YGR208W | 2.41 | 0.24 | -0.5  |
| ptc7    | YHR076W | 2.4  | 0.01 | -0.51 |
| ssk2    | YNR031C | 2.4  | 0.17 | -0.51 |
| inp52   | YNL106C | 2.4  | 0.06 | -0.51 |
| kgp1    | YHR082C | 2.4  | 0.07 | -0.51 |
| pho81   | YGR233C | 2.4  | 0.01 | -0.52 |
| yhr1    | YHR111W | 2.39 | 0.04 | -0.53 |
| pho80   | YOL001W | 2.39 | 0.08 | -0.53 |
| msg2    | YNL053W | 2.38 | 0.24 | -0.53 |
| mlp1    | YKL161C | 2.38 | 0.02 | -0.53 |
| mih1    | YMR036C | 2.38 | 0.05 | -0.53 |
| ptk2    | YJR059W | 2.38 | 0.07 | -0.53 |
| psk2    | YOL045W | 2.38 | 0    | -0.53 |
| sip2    | YGL208W | 2.37 | 0.15 | -0.54 |
| prp28   | YDR243C | 2.37 | 0.07 | -0.54 |
| thr1    | YHR025W | 2.36 | 0.18 | -0.55 |
| ymr291w | ymr291w | 2.36 | 0.08 | -0.56 |
| apl6    | YGR261C | 2.36 | 0.02 | -0.56 |
| ppt1    | YGR123C | 2.36 | 0.1  | -0.56 |
| ynk1    | YKL067W | 2.35 | 0.2  | -0.57 |
| erg8    | YMR220W | 2.35 | 0.1  | -0.57 |
| tpk3    | YKL166C | 2.34 | 0.09 | -0.57 |
| pyk2    | YOR347C | 2.34 | 0.05 | -0.57 |
| pcl8    | YPL219W | 2.34 | 0.03 | -0.58 |
| aps3    | YJL024C | 2.33 | 0.1  | -0.58 |
| mss4    | YDR208W | 2.33 | 0.17 | -0.59 |
| cmk2    | YOL016C | 2.32 | 0.02 | -0.59 |
| siw14   | YNL032W | 2.32 | 0.14 | -0.6  |
| thi20   | YOL055C | 2.32 | 0.01 | -0.6  |
| apl5    | YPL195W | 2.32 | 0.04 | -0.6  |

|         |         |      |      |       |
|---------|---------|------|------|-------|
| pif1    | YML061C | 2.31 | 0.23 | -0.61 |
| yol138c | yol138c | 2.31 | 0.03 | -0.61 |
| inp53   | YOR109W | 2.31 | 0.01 | -0.61 |
| dbf20   | YPR111W | 2.3  | 0.02 | -0.62 |
| ysr3    | YKR053C | 2.3  | 0.14 | -0.62 |
| inp54   | YOL065C | 2.3  | 0.03 | -0.62 |
| npr1    | YNL183C | 2.29 | 0.13 | -0.62 |
| sic1    | YLR079W | 2.29 | 0.04 | -0.62 |
| dog2    | YHR043C | 2.28 | 0.01 | -0.63 |
| sap185  | YJL098W | 2.28 | 0.06 | -0.63 |
| yvn1    | YIR026C | 2.28 | 0.05 | -0.64 |
| adr1    | YDR216W | 2.28 | 0.04 | -0.64 |
| rom1    | YGR070W | 2.27 | 0.12 | -0.65 |
| ltp1    | YPR073C | 2.26 | 0.14 | -0.65 |
| pkh2    | YOL100W | 2.26 | 0.12 | -0.66 |
| ypl141c | ypl141c | 2.26 | 0.1  | -0.66 |
| pcl2    | YDL127W | 2.25 | 0.09 | -0.67 |
| hrk1    | YOR267C | 2.25 | 0.06 | -0.67 |
| pil1    | YGR086C | 2.25 | 0    | -0.67 |
| vhs1    | YDR247W | 2.25 | 0.13 | -0.67 |
| xks1    | YGR194C | 2.24 | 0.05 | -0.68 |
| ckb2    | YOR039W | 2.24 | 0.03 | -0.68 |
| ynr047w | ynr047w | 2.2  | 0.05 | -0.72 |
| pfk27   | YOL136C | 2.2  | 0.02 | -0.72 |
| ygk3    | YOL128C | 2.19 | 0.02 | -0.73 |
| kss1    | YGR040W | 2.18 | 0.04 | -0.74 |
| iks1    | YJL057C | 2.18 | 0.03 | -0.74 |
| mkk2    | YPL140C | 2.16 | 0.01 | -0.76 |
| tor1    | YJR066W | 2.15 | 0    | -0.77 |
| smk1    | YPRO54W | 2.15 | 0.03 | -0.77 |
| tep1    | YNL128W | 2.11 | 0.01 | -0.81 |
| gac1    | YOR178C | 2.1  | 0.14 | -0.82 |
| mck1    | YNL307C | 2.04 | 0.09 | -0.89 |
| tpk2    | YPL203W | 2.01 | 0.06 | -0.91 |
| lcb4    | YOR171C | 2.01 | 0.17 | -0.92 |
| vps34   | YLR240W | 2.01 | 0.06 | -0.92 |
| urk1    | YNR012W | 1.98 | 0.01 | -0.95 |
| ypl236c | ypl236c | 1.98 | 0.31 | -0.95 |
| skm1    | YOL113W | 1.82 | 0.17 | -1.12 |

B. Glycerol 6 h

| <b>Standard name</b> | <b>Systematic name</b> | <b>Glycerol 6 h</b> | <b>SD</b> | <b>Z value</b> |
|----------------------|------------------------|---------------------|-----------|----------------|
| elm1                 | YKL048C                | 12.03               | 4.32      | 4.31           |

|         |         |       |      |      |
|---------|---------|-------|------|------|
| hrr25   | YPL204W | 11.58 | 5.26 | 4.01 |
| ctk3    | YML112W | 9.82  | 2.15 | 2.84 |
| ypk1    | YKL126W | 9.73  | 0.82 | 2.77 |
| bud32   | YGR262C | 9.65  | 3.33 | 2.72 |
| cax4    | YGR036C | 9.65  | 3.17 | 2.72 |
| hsl1    | YKL101W | 9.6   | 2.01 | 2.69 |
| apl5    | YPL195W | 9.22  | 3.33 | 2.43 |
| ctk1    | YKL139W | 9.05  | 2.3  | 2.32 |
| cla4    | YNL298W | 8.78  | 3.59 | 2.14 |
| cln1    | YMR199W | 8.77  | 2.51 | 2.14 |
| ssk1    | YLR006C | 8.52  | 1.27 | 1.97 |
| dbf2    | YGR092W | 8.5   | 2.67 | 1.95 |
| rts1    | YOR014W | 8.4   | 3.81 | 1.89 |
| erg12   | YMR208W | 8.22  | 2.79 | 1.77 |
| ark1    | YNL020C | 8.2   | 2.33 | 1.76 |
| mih1    | YMR036C | 8.03  | 1.42 | 1.64 |
| msg2    | YNL053W | 7.93  | 2.33 | 1.57 |
| ssu72   | YNL222W | 7.78  | 2.45 | 1.47 |
| kns1    | YLL019C | 7.71  | 0.8  | 1.42 |
| tpd3    | YAL016W | 7.65  | 4.96 | 1.39 |
| yhr1    | YHR111W | 7.51  | 2.22 | 1.3  |
| hvk2    | YGL253W | 7.48  | 0.76 | 1.27 |
| cln3    | YAL040C | 7.4   | 1.6  | 1.22 |
| sks1    | YPL026C | 7.39  | 2.4  | 1.21 |
| erg8    | YMR220W | 7.35  | 1.6  | 1.19 |
| dbf20   | YPR111W | 7.34  | 3.81 | 1.18 |
| tpp1    | YMR156C | 7.33  | 0.94 | 1.17 |
| pho85   | YPL031C | 7.31  | 2.31 | 1.16 |
| yak1    | YJL141C | 7.28  | 0.8  | 1.14 |
| sfk1    | YKL051W | 7.24  | 1.24 | 1.12 |
| cki1    | YLR133W | 7.23  | 0.33 | 1.11 |
| tsl1    | YML100W | 7.23  | 0.75 | 1.1  |
| yck1    | YHR135C | 7.07  | 1.4  | 1    |
| tep1    | YNL128W | 6.99  | 0.48 | 0.95 |
| cka1    | YIL035C | 6.79  | 1.42 | 0.81 |
| yck3    | YER123W | 6.78  | 0.37 | 0.81 |
| ymr291w | ymr291w | 6.78  | 0.34 | 0.8  |
| tps3    | YMR261C | 6.78  | 0.26 | 0.8  |
| sap190  | YKRO28W | 6.75  | 1.89 | 0.79 |
| dak1    | YML070W | 6.71  | 1.47 | 0.76 |
| ppt1    | YGR123C | 6.69  | 0.45 | 0.75 |
| mkk1    | YOR231W | 6.69  | 1.76 | 0.74 |
| rio1    | YOR119C | 6.68  | 2.3  | 0.74 |

|         |         |      |      |      |
|---------|---------|------|------|------|
| kss1    | YGR040W | 6.61 | 1.2  | 0.69 |
| prf1    | YKL116C | 6.61 | 0.36 | 0.69 |
| sic1    | YLR079W | 6.6  | 0.78 | 0.69 |
| xks1    | YGR194C | 6.59 | 0.59 | 0.68 |
| rom1    | YGR070W | 6.58 | 0.16 | 0.67 |
| utr1    | YJR049C | 6.57 | 0.54 | 0.66 |
| ykl171w | ykl171w | 6.56 | 0.82 | 0.66 |
| psr2    | YLR019W | 6.52 | 0.51 | 0.63 |
| vps15   | YBR097W | 6.51 | 0.61 | 0.63 |
| ypk2    | YMR104C | 6.51 | 1.15 | 0.62 |
| ppg1    | YNR032W | 6.49 | 2.84 | 0.61 |
| kin3    | YAR018C | 6.48 | 1.63 | 0.61 |
| bck2    | YER167W | 6.47 | 0.8  | 0.6  |
| yvn1    | YIR026C | 6.47 | 0.99 | 0.6  |
| ygr205w | ygr205w | 6.46 | 2.71 | 0.59 |
| psk2    | YOL045W | 6.45 | 1.59 | 0.58 |
| kin2    | YLR096W | 6.44 | 0.85 | 0.58 |
| pcl8    | YPL219W | 6.43 | 2.87 | 0.57 |
| tpk1    | YJL164C | 6.43 | 0.27 | 0.57 |
| ime2    | YJL106W | 6.4  | 0.74 | 0.55 |
| hdg1    | YLR113W | 6.31 | 0.4  | 0.49 |
| lcb3    | YJL134W | 6.28 | 0.59 | 0.47 |
| sap185  | YJL098W | 6.28 | 0.77 | 0.47 |
| pph21   | YDL134C | 6.28 | 0.74 | 0.47 |
| cdc19   | YAL038W | 6.27 | 1.43 | 0.47 |
| psr1    | YLL010C | 6.26 | 0.53 | 0.46 |
| hal5    | YJL165C | 6.21 | 0.68 | 0.43 |
| kin4    | YOR233W | 6.2  | 1.94 | 0.42 |
| mlp1    | YKL161C | 6.19 | 0.43 | 0.41 |
| pcl1    | YNL289W | 6.18 | 2.41 | 0.4  |
| sln1    | YIL147C | 6.17 | 0.53 | 0.4  |
| pbs2    | YJL128C | 6.16 | 0.61 | 0.39 |
| gin4    | YDR507C | 6.15 | 2.39 | 0.38 |
| kkq8    | YKL168C | 6.11 | 0.71 | 0.36 |
| dig1    | YPL049C | 6.11 | 1.8  | 0.36 |
| rrd1    | YIL153W | 6.08 | 0.51 | 0.34 |
| lsb6    | YJL100W | 6.08 | 1.41 | 0.34 |
| ser2    | YGR208W | 6.08 | 0.96 | 0.34 |
| aps3    | YJL024C | 6.07 | 0.49 | 0.33 |
| sdp1    | YIL113W | 6.06 | 1.13 | 0.32 |
| bck1    | YJL095W | 6.04 | 0.68 | 0.31 |
| ppz1    | YML016C | 6.04 | 1.97 | 0.31 |
| ptk1    | YKL198C | 6.03 | 0.36 | 0.31 |



|         |         |      |      |       |
|---------|---------|------|------|-------|
| ynk1    | YKL067W | 6.03 | 0.3  | 0.3   |
| kgp1    | YHR082C | 6.01 | 0.72 | 0.29  |
| met14   | YKL001C | 6    | 0.46 | 0.28  |
| ptc5    | YOR090C | 6    | 2.32 | 0.28  |
| ptk2    | YJR059W | 5.99 | 0.55 | 0.28  |
| inp53   | YOR109W | 5.96 | 1.99 | 0.26  |
| thi20   | YOL055C | 5.94 | 1.77 | 0.24  |
| iks1    | YJL057C | 5.93 | 0.8  | 0.24  |
| glc8    | YMR311C | 5.92 | 1.1  | 0.23  |
| tor1    | YJR066W | 5.91 | 2.49 | 0.23  |
| mec1    | YBR136W | 5.86 | 0.85 | 0.19  |
| vhs3    | YOR054C | 5.86 | 2.42 | 0.19  |
| akl1    | YBR059C | 5.83 | 0.77 | 0.17  |
| ssk2    | YNR031C | 5.83 | 1.58 | 0.17  |
| inp51   | YIL002C | 5.81 | 0.81 | 0.16  |
| ypr161c | ypr161c | 5.8  | 1.77 | 0.15  |
| pcl2    | YDL127W | 5.79 | 3.62 | 0.14  |
| inp52   | YNL106C | 5.78 | 1.64 | 0.14  |
| pos5    | YPL188W | 5.73 | 2.22 | 0.1   |
| urk1    | YNR012W | 5.73 | 1.65 | 0.1   |
| prk1    | YIL095W | 5.72 | 1.06 | 0.1   |
| apl6    | YGR261C | 5.69 | 0.94 | 0.08  |
| sac1    | YKL212W | 5.65 | 2.49 | 0.05  |
| tor2    | YKL203C | 5.63 | 0.79 | 0.04  |
| ire1    | YHR079C | 5.61 | 0.59 | 0.02  |
| ado1    | YJR105W | 5.6  | 0.65 | 0.02  |
| thi22   | YPR121W | 5.59 | 2.26 | 0.01  |
| cmk2    | YOL016C | 5.59 | 1.53 | 0.01  |
| ppe1    | YHR075C | 5.58 | 0.64 | 0.01  |
| cdc5    | YMR001C | 5.55 | 0.7  | -0.02 |
| pkh2    | YOL100W | 5.49 | 1.67 | -0.06 |
| cka2    | YOR061W | 5.48 | 1.19 | -0.07 |
| ssn3    | YPL042C | 5.48 | 0.74 | -0.07 |
| ysr3    | YKR053C | 5.41 | 2.28 | -0.11 |
| yer134c | yer134c | 5.41 | 0.94 | -0.11 |
| pil1    | YGR086C | 5.4  | 0.52 | -0.11 |
| ypl150w | ypl150w | 5.4  | 2.38 | -0.11 |
| yol138c | yol138c | 5.39 | 1.35 | -0.12 |
| phr2    | YIL053W | 5.39 | 0.86 | -0.12 |
| stt4    | YLR305C | 5.38 | 1.65 | -0.13 |
| sip2    | YGL208W | 5.38 | 0.9  | -0.13 |
| chk1    | YBR274W | 5.37 | 0.59 | -0.13 |
| ckb1    | YGL019W | 5.34 | 1.07 | -0.15 |

|         |         |      |      |       |
|---------|---------|------|------|-------|
| npr1    | YNL183C | 5.31 | 1.5  | -0.18 |
| sch9    | YHR205W | 5.3  | 2.28 | -0.18 |
| kcc4    | YCL024W | 5.3  | 0.14 | -0.19 |
| ptc1    | YDL006W | 5.27 | 0.4  | -0.21 |
| hec1    | YIL144W | 5.24 | 0.6  | -0.22 |
| pip2    | YOR363C | 5.24 | 1.14 | -0.23 |
| inp54   | YOL065C | 5.23 | 1.24 | -0.23 |
| adk1    | YDR226W | 5.21 | 2.53 | -0.24 |
| pcl9    | YDL179W | 5.21 | 0.8  | -0.24 |
| rck2    | YLR248W | 5.19 | 1.64 | -0.25 |
| pho81   | YGR233C | 5.17 | 0.25 | -0.27 |
| ste20   | YHL007C | 5.16 | 0.77 | -0.28 |
| tpk2    | YPL203W | 5.16 | 1.92 | -0.28 |
| ptp2    | YOR208W | 5.14 | 1.73 | -0.29 |
| pyk2    | YOR347C | 5.13 | 1.26 | -0.3  |
| cbk1    | YNL161W | 5.13 | 0.9  | -0.3  |
| tpk3    | YKL166C | 5.12 | 0.81 | -0.3  |
| ypl141c | ypl141c | 5.09 | 1.28 | -0.33 |
| lsp1    | YPL004C | 5.05 | 0.87 | -0.35 |
| rck1    | YGL158W | 5.04 | 1.55 | -0.35 |
| fab1    | YFR019W | 5.03 | 0.99 | -0.36 |
| spl2    | YHR136C | 5.02 | 1.64 | -0.37 |
| dog1    | YHR044C | 4.99 | 0.59 | -0.39 |
| cak1    | YFL029C | 4.98 | 0.98 | -0.4  |
| by4742  | by4742  | 4.97 | 1.07 | -0.41 |
| hrk1    | YOR267C | 4.96 | 1.31 | -0.41 |
| gac1    | YOR178C | 4.94 | 1.16 | -0.43 |
| mkk2    | YPL140C | 4.93 | 2.19 | -0.43 |
| mss4    | YDR208W | 4.92 | 1.34 | -0.44 |
| pfk27   | YOL136C | 4.91 | 0.96 | -0.44 |
| ppq1    | YPL179W | 4.86 | 0.49 | -0.48 |
| bro1    | YPL084W | 4.85 | 0.75 | -0.49 |
| siw14   | YNL032W | 4.84 | 0.2  | -0.49 |
| gcn20   | YFR009W | 4.82 | 0.93 | -0.5  |
| rbs1    | YDL189W | 4.81 | 0.64 | -0.51 |
| his2    | YFR025C | 4.75 | 0.25 | -0.55 |
| lcb4    | YOR171C | 4.74 | 1.48 | -0.56 |
| reg1    | YDR028C | 4.73 | 0.7  | -0.56 |
| dun1    | YDL101C | 4.72 | 0.63 | -0.57 |
| hnt1    | YDL125C | 4.72 | 0.51 | -0.57 |
| snf1    | YDR477W | 4.69 | 1.7  | -0.59 |
| adk2    | YER170W | 4.68 | 0.3  | -0.6  |
| gal83   | YER027C | 4.67 | 0.63 | -0.6  |

|         |         |      |      |       |
|---------|---------|------|------|-------|
| fus3    | YBL016W | 4.66 | 0.1  | -0.61 |
| adr1    | YDR216W | 4.64 | 1.17 | -0.63 |
| pho3    | YBR092C | 4.63 | 0.26 | -0.63 |
| pps1    | YBR276C | 4.57 | 0.29 | -0.67 |
| thi21   | YPL258C | 4.55 | 1.03 | -0.68 |
| dak2    | YFL053W | 4.54 | 0.33 | -0.69 |
| tos3    | YGL179C | 4.54 | 0.54 | -0.69 |
| dog2    | YHR043C | 4.53 | 1.46 | -0.7  |
| smk1    | YPR054W | 4.5  | 2.66 | -0.72 |
| mck1    | YNL307C | 4.49 | 0.78 | -0.73 |
| ste7    | YDL159W | 4.47 | 0.38 | -0.73 |
| ppm1    | YDR435C | 4.45 | 1.36 | -0.75 |
| kin82   | YCR091W | 4.44 | 0.2  | -0.76 |
| ptc7    | YHR076W | 4.42 | 2.01 | -0.77 |
| ckb2    | YOR039W | 4.42 | 0.27 | -0.77 |
| arg5.6  | YER069W | 4.38 | 0.24 | -0.8  |
| tps2    | YDR074W | 4.38 | 1.01 | -0.8  |
| atg1    | YGL180W | 4.37 | 0.4  | -0.8  |
| ycr079w | ycr079w | 4.37 | 0.13 | -0.8  |
| pho8    | YDR481C | 4.36 | 0.57 | -0.81 |
| pho80   | YOL001W | 4.35 | 1.23 | -0.82 |
| sat4    | YCR008W | 4.34 | 0.29 | -0.82 |
| ydl025c | ydl025c | 4.33 | 0.48 | -0.83 |
| prp28   | YDR243C | 4.32 | 2.12 | -0.84 |
| pph3    | YDR075W | 4.31 | 0.63 | -0.84 |
| ptc4    | YBR125C | 4.3  | 0.4  | -0.85 |
| tel1    | YBL088C | 4.29 | 0.15 | -0.86 |
| prr2    | YDL214C | 4.26 | 0.39 | -0.88 |
| ygk3    | YOL128C | 4.25 | 0.52 | -0.88 |
| thr1    | YHR025W | 4.25 | 1.51 | -0.88 |
| gcn2    | YDR283C | 4.24 | 1.93 | -0.89 |
| ybr028c | ybr028c | 4.23 | 0.22 | -0.9  |
| ptp3    | YER075C | 4.22 | 0.92 | -0.91 |
| ynr047w | ynr047w | 4.19 | 0.15 | -0.92 |
| dbf4    | YDR052C | 4.19 | 0.4  | -0.93 |
| sho1    | YER118C | 4.19 | 0.46 | -0.93 |
| dpp1    | YDR284C | 4.17 | 0.69 | -0.94 |
| reg2    | YBR050C | 4.16 | 0.43 | -0.94 |
| pkh3    | YDR466W | 4.16 | 0.97 | -0.94 |
| psk1    | YAL017W | 4.15 | 0.43 | -0.95 |
| vhs1    | YDR247W | 4.15 | 2.16 | -0.95 |
| ppz2    | YDR436W | 4.14 | 0.61 | -0.96 |
| pak1    | YER129W | 4.12 | 0.26 | -0.97 |

|         |         |      |      |       |
|---------|---------|------|------|-------|
| ssk22   | YCR073C | 4.12 | 0.37 | -0.97 |
| mps1    | YDL028C | 4.11 | 0.13 | -0.98 |
| ptp1    | YDL230W | 4.11 | 0.35 | -0.98 |
| ltp1    | YPR073C | 4.11 | 2.1  | -0.98 |
| pho5    | YBR093C | 4.09 | 0.42 | -0.99 |
| cmk1    | YFR014C | 4.07 | 0.4  | -1.01 |
| pkh1    | YDR490C | 4.06 | 0.78 | -1.01 |
| mrk1    | YDL079C | 4.05 | 0.32 | -1.02 |
| sok1    | YDR006C | 4.04 | 0.35 | -1.02 |
| kin1    | YDR122W | 4.03 | 0.49 | -1.03 |
| eki1    | YDR147W | 3.99 | 0.37 | -1.06 |
| dig2    | YDR480W | 3.99 | 0.73 | -1.06 |
| pph2    | YDL134C | 3.98 | 0.25 | -1.06 |
| cdc15   | YAR019C | 3.96 | 0.18 | -1.08 |
| apm3    | YBR288C | 3.93 | 0.49 | -1.1  |
| snf4    | YGL115W | 3.92 | 0.78 | -1.11 |
| hom3    | YER052C | 3.88 | 0.47 | -1.13 |
| ptc2    | YER089C | 3.87 | 0.7  | -1.14 |
| alk1    | YGL021W | 3.78 | 0.34 | -1.2  |
| pcl6    | YER059W | 3.77 | 0.62 | -1.2  |
| arg82   | YDR173C | 3.76 | 0.59 | -1.21 |
| scy1    | YGL083W | 3.75 | 0.35 | -1.22 |
| ypl236c | ypl236c | 3.71 | 0.6  | -1.24 |
| lpp1    | YDR503C | 3.66 | 0.79 | -1.28 |
| hor2    | YER062C | 3.59 | 0.78 | -1.33 |
| kin28   | YDL108W | 3.57 | 0.63 | -1.34 |
| pro1    | YDR300C | 3.56 | 1.17 | -1.34 |
| sip1    | YDR422C | 3.49 | 1.15 | -1.39 |
| pif1    | YML061C | 3.32 | 0.25 | -1.51 |
| skm1    | YOL113W | 3.28 | 0.69 | -1.53 |
| sit4    | YDL047W | 2.96 | 0.52 | -1.75 |
| lcb5    | YLR260W | 2.92 | 1.39 | -1.77 |
| vps34   | YLR240W | 2.53 | 0.78 | -2.03 |
| pex3    | YDR329C | 3.25 | 1.15 | -1.55 |

C. Oleate 3 h

| <b>Standard name</b> | <b>Systematic name</b> | <b>Oleate 3 h</b> | <b>SD</b> | <b>Z value</b> |
|----------------------|------------------------|-------------------|-----------|----------------|
| dbf2                 | YGR092W                | 13.23             | 1.69      | 5.48           |
| elm1                 | YKL048C                | 12.58             | 1.82      | 4.98           |
| ark1                 | YNL020C                | 10.78             | 1.48      | 3.59           |
| yck3                 | YER123W                | 9.79              | 2.02      | 2.83           |
| hvk2                 | YGL253W                | 9.63              | 0.9       | 2.71           |
| kin3                 | YAR018C                | 9.51              | 2.33      | 2.62           |

|         |         |      |      |      |
|---------|---------|------|------|------|
| cax4    | YGR036C | 9.37 | 2.27 | 2.51 |
| cdc19   | YAL038W | 9.3  | 2.6  | 2.45 |
| cla4    | YNL298W | 9.05 | 2.01 | 2.26 |
| hsl1    | YKL101W | 8.89 | 1.64 | 2.14 |
| cln3    | YAL040C | 8.72 | 2.33 | 2.01 |
| ypk1    | YKL126W | 8.33 | 1.53 | 1.71 |
| ssk1    | YLR006C | 8.32 | 1.59 | 1.7  |
| rio1    | YOR119C | 8.17 | 3.18 | 1.58 |
| yck1    | YHR135C | 7.89 | 1.13 | 1.36 |
| dog1    | YHR044C | 7.75 | 1.71 | 1.26 |
| ppt1    | YGR123C | 7.73 | 1    | 1.25 |
| cka2    | YOR061W | 7.65 | 0.83 | 1.18 |
| rts1    | YOR014W | 7.62 | 0.55 | 1.16 |
| kgp1    | YHR082C | 7.6  | 0.64 | 1.15 |
| hrr25   | YPL204W | 7.59 | 1.76 | 1.14 |
| cln1    | YMR199W | 7.55 | 2.48 | 1.11 |
| ysr3    | YKR053C | 7.54 | 1.21 | 1.1  |
| yak1    | YJL141C | 7.46 | 0.75 | 1.04 |
| pph21   | YDL134C | 7.26 | 1.63 | 0.88 |
| met14   | YKL001C | 7.22 | 1.08 | 0.85 |
| sdp1    | YIL113W | 7.21 | 1.35 | 0.85 |
| dig1    | YPL049C | 7.2  | 1.3  | 0.83 |
| pil1    | YGR086C | 7.15 | 1.05 | 0.8  |
| kss1    | YGR040W | 7.12 | 0.44 | 0.77 |
| bud32   | YGR262C | 7.1  | 1.42 | 0.76 |
| ptp3    | YER075C | 7.05 | 1.14 | 0.72 |
| prk1    | YIL095W | 7.02 | 1.33 | 0.7  |
| thr1    | YHR025W | 7.01 | 3.02 | 0.69 |
| ctk1    | YKL139W | 7    | 3.64 | 0.68 |
| inp51   | YIL002C | 6.99 | 0.79 | 0.67 |
| sip2    | YGL208W | 6.99 | 0.73 | 0.67 |
| ynr047w | ynr047w | 6.98 | 0.87 | 0.67 |
| tpk1    | YJL164C | 6.87 | 0.33 | 0.59 |
| bck2    | YER167W | 6.86 | 1.76 | 0.57 |
| his2    | YFR025C | 6.85 | 1.11 | 0.56 |
| ptk2    | YJR059W | 6.84 | 0.31 | 0.56 |
| kns1    | YLL019C | 6.84 | 0.75 | 0.56 |
| apl6    | YGR261C | 6.84 | 0.87 | 0.56 |
| ygr205w | ygr205w | 6.84 | 0.47 | 0.56 |
| tsl1    | YML100W | 6.83 | 0.41 | 0.55 |
| thi22   | YPR121W | 6.82 | 2.1  | 0.55 |
| tpp1    | YMR156C | 6.82 | 0.56 | 0.54 |
| adk1    | YDR226W | 6.82 | 0.87 | 0.54 |

|         |         |      |      |      |
|---------|---------|------|------|------|
| mlp1    | YKL161C | 6.79 | 0.36 | 0.52 |
| ptc5    | YOR090C | 6.78 | 0.58 | 0.52 |
| sfk1    | YKL051W | 6.77 | 1.35 | 0.51 |
| chk1    | YBR274W | 6.77 | 1.68 | 0.5  |
| aps3    | YJL024C | 6.76 | 1.11 | 0.5  |
| yol138c | yol138c | 6.76 | 1.3  | 0.5  |
| ptk1    | YKL198C | 6.75 | 0.43 | 0.49 |
| sch9    | YHR205W | 6.74 | 1.25 | 0.48 |
| ppg1    | YNR032W | 6.72 | 0.81 | 0.47 |
| rom1    | YGR070W | 6.71 | 0.7  | 0.46 |
| cki1    | YLR133W | 6.7  | 0.57 | 0.45 |
| ire1    | YHR079C | 6.67 | 0.71 | 0.43 |
| xks1    | YGR194C | 6.67 | 0.75 | 0.43 |
| ymr291w | ymr291w | 6.66 | 0.69 | 0.42 |
| kkq8    | YKL168C | 6.66 | 0.82 | 0.42 |
| hal5    | YJL165C | 6.66 | 0.62 | 0.42 |
| ykl171w | ykl171w | 6.62 | 0.92 | 0.39 |
| utr1    | YJR049C | 6.62 | 0.37 | 0.39 |
| ctk3    | YML112W | 6.6  | 2.76 | 0.37 |
| rrd1    | YIL153W | 6.59 | 1.11 | 0.37 |
| hdg1    | YLR113W | 6.58 | 0.53 | 0.36 |
| psk1    | YAL017W | 6.57 | 1.49 | 0.35 |
| pho81   | YGR233C | 6.57 | 0.47 | 0.35 |
| ime2    | YJL106W | 6.55 | 0.83 | 0.33 |
| mps1    | YDL028C | 6.54 | 2.54 | 0.33 |
| spl2    | YHR136C | 6.53 | 1.13 | 0.32 |
| cak1    | YFL029C | 6.49 | 1.27 | 0.29 |
| iks1    | YJL057C | 6.49 | 0.63 | 0.29 |
| yvn1    | YIRO26C | 6.49 | 1.44 | 0.29 |
| akl1    | YBR059C | 6.47 | 1.29 | 0.28 |
| reg2    | YBR050C | 6.44 | 1.07 | 0.25 |
| ppm1    | YDR435C | 6.43 | 0.96 | 0.24 |
| ser2    | YGR208W | 6.43 | 0.39 | 0.24 |
| sln1    | YIL147C | 6.4  | 1.07 | 0.22 |
| lcb3    | YJL134W | 6.38 | 0.57 | 0.21 |
| ptp2    | YOR208W | 6.37 | 0.95 | 0.2  |
| cka1    | YIL035C | 6.37 | 1.67 | 0.2  |
| ptc7    | YHR076W | 6.35 | 0.49 | 0.18 |
| pbs2    | YJL128C | 6.35 | 0.77 | 0.18 |
| inp53   | YOR109W | 6.34 | 0.87 | 0.18 |
| psr1    | YLL010C | 6.34 | 0.55 | 0.17 |
| mkk1    | YOR231W | 6.33 | 0.77 | 0.17 |
| ynk1    | YKL067W | 6.29 | 0.36 | 0.14 |

|         |         |      |      |       |
|---------|---------|------|------|-------|
| bck1    | YJL095W | 6.28 | 0.62 | 0.13  |
| pph2    | YDL134C | 6.27 | 1.61 | 0.12  |
| gcn20   | YFR009W | 6.26 | 1.29 | 0.11  |
| tor2    | YKL203C | 6.25 | 0.72 | 0.11  |
| pfk27   | YOL136C | 6.24 | 1.01 | 0.1   |
| gcn2    | YDR283C | 6.24 | 0.74 | 0.1   |
| sap190  | YKR028W | 6.24 | 0.58 | 0.1   |
| msg2    | YNL053W | 6.23 | 0.83 | 0.09  |
| gac1    | YOR178C | 6.22 | 1    | 0.08  |
| fab1    | YFR019W | 6.2  | 1.04 | 0.07  |
| dak1    | YML070W | 6.19 | 1.15 | 0.06  |
| glc8    | YMR311C | 6.18 | 0.67 | 0.05  |
| lsb6    | YJL100W | 6.16 | 1.28 | 0.04  |
| ppz1    | YML016C | 6.15 | 0.89 | 0.03  |
| ado1    | YJR105W | 6.14 | 1.3  | 0.02  |
| alk1    | YGL021W | 6.13 | 0.97 | 0.01  |
| apl5    | YPL195W | 6.13 | 0.71 | 0.01  |
| ssu72   | YNL222W | 6.12 | 1.39 | 0.01  |
| ppe1    | YHR075C | 6.1  | 0.92 | -0.01 |
| kcc4    | YCL024W | 6.1  | 1.24 | -0.01 |
| mrk1    | YDL079C | 6.09 | 1.49 | -0.02 |
| pkh3    | YDR466W | 6.09 | 0.94 | -0.02 |
| ckb1    | YGL019W | 6.09 | 1.35 | -0.02 |
| erg12   | YMR208W | 6.08 | 1.61 | -0.02 |
| ypr161c | ypr161c | 6.06 | 0.61 | -0.04 |
| dig2    | YDR480W | 6.06 | 0.83 | -0.04 |
| rck2    | YLR248W | 6.05 | 0.52 | -0.05 |
| pcl9    | YDL179W | 6.04 | 1.47 | -0.06 |
| atg1    | YGL180W | 6.04 | 1.25 | -0.06 |
| sho1    | YER118C | 6.04 | 0.88 | -0.06 |
| vhs3    | YOR054C | 6.03 | 0.96 | -0.06 |
| vhs1    | YDR247W | 6.02 | 0.78 | -0.07 |
| eki1    | YDR147W | 6    | 1.75 | -0.09 |
| ppz2    | YDR436W | 6    | 1.27 | -0.09 |
| dbf4    | YDR052C | 6    | 1.22 | -0.09 |
| tor1    | YJR066W | 6    | 1.59 | -0.09 |
| ydl025c | ydl025c | 5.99 | 1.34 | -0.1  |
| cmk1    | YFR014C | 5.96 | 0.81 | -0.11 |
| dak2    | YFL053W | 5.95 | 1.15 | -0.12 |
| tos3    | YGL179C | 5.94 | 1.02 | -0.13 |
| mec1    | YBR136W | 5.94 | 0.78 | -0.13 |
| dun1    | YDL101C | 5.93 | 1.41 | -0.14 |
| ptc4    | YBR125C | 5.93 | 1.05 | -0.14 |

|         |         |      |      |       |
|---------|---------|------|------|-------|
| ptc2    | YER089C | 5.93 | 0.77 | -0.14 |
| arg5.6  | YER069W | 5.93 | 0.76 | -0.14 |
| rck1    | YGL158W | 5.91 | 0.89 | -0.16 |
| prp1    | YKL116C | 5.91 | 1.19 | -0.16 |
| yer134c | yer134c | 5.9  | 0.84 | -0.16 |
| hom3    | YER052C | 5.89 | 1.1  | -0.17 |
| pkh1    | YDR490C | 5.89 | 0.85 | -0.17 |
| pph3    | YDR075W | 5.88 | 1.31 | -0.18 |
| kin2    | YLR096W | 5.88 | 0.64 | -0.18 |
| ygk3    | YOL128C | 5.87 | 0.77 | -0.18 |
| lpp1    | YDR503C | 5.87 | 1.14 | -0.19 |
| ybr028c | ybr028c | 5.86 | 1.26 | -0.19 |
| ypk2    | YMR104C | 5.84 | 0.57 | -0.21 |
| pho85   | YPL031C | 5.84 | 1.47 | -0.21 |
| prp28   | YDR243C | 5.83 | 0.76 | -0.22 |
| sks1    | YPL026C | 5.83 | 0.97 | -0.22 |
| ste7    | YDL159W | 5.8  | 1.35 | -0.24 |
| adk2    | YER170W | 5.8  | 0.86 | -0.24 |
| sic1    | YLR079W | 5.8  | 1.48 | -0.24 |
| pyk2    | YOR347C | 5.8  | 0.97 | -0.24 |
| prp2    | YDL214C | 5.79 | 1.09 | -0.25 |
| dbf20   | YPR111W | 5.78 | 0.58 | -0.25 |
| tps3    | YMR261C | 5.78 | 0.74 | -0.26 |
| pho3    | YBR092C | 5.77 | 1.41 | -0.27 |
| ycr079w | ycr079w | 5.76 | 1.29 | -0.27 |
| pcl1    | YNL289W | 5.75 | 0.47 | -0.28 |
| hec1    | YIL144W | 5.75 | 1.38 | -0.28 |
| tpk3    | YKL166C | 5.74 | 1.74 | -0.29 |
| fus3    | YBL016W | 5.73 | 1.07 | -0.3  |
| pho5    | YBR093C | 5.73 | 1.36 | -0.3  |
| yhr1    | YHR111W | 5.71 | 0.36 | -0.31 |
| siw14   | YNL032W | 5.7  | 0.69 | -0.32 |
| mih1    | YMR036C | 5.69 | 1.09 | -0.32 |
| pho8    | YDR481C | 5.68 | 0.75 | -0.33 |
| dpp1    | YDR284C | 5.68 | 0.91 | -0.33 |
| smk1    | YPRO54W | 5.67 | 0.34 | -0.34 |
| rbs1    | YDL189W | 5.67 | 1.08 | -0.34 |
| ltp1    | YPRO73C | 5.67 | 0.42 | -0.34 |
| ssk2    | YNR031C | 5.63 | 2.31 | -0.37 |
| arg82   | YDR173C | 5.62 | 1.22 | -0.38 |
| kin4    | YOR233W | 5.59 | 0.57 | -0.4  |
| thi20   | YOL055C | 5.58 | 0.43 | -0.41 |
| sap185  | YJL098W | 5.57 | 0.98 | -0.42 |



|         |         |      |      |       |
|---------|---------|------|------|-------|
| sac1    | YKL212W | 5.55 | 0.82 | -0.43 |
| dog2    | YHR043C | 5.55 | 0.9  | -0.44 |
| sat4    | YCR008W | 5.54 | 1.12 | -0.44 |
| hrk1    | YOR267C | 5.54 | 1.07 | -0.44 |
| pkh2    | YOL100W | 5.53 | 1.95 | -0.45 |
| ssk22   | YCR073C | 5.51 | 1.32 | -0.46 |
| hnt1    | YDL125C | 5.5  | 1.46 | -0.47 |
| npr1    | YNL183C | 5.5  | 0.75 | -0.47 |
| ckb2    | YOR039W | 5.49 | 0.51 | -0.48 |
| kin1    | YDR122W | 5.46 | 1.32 | -0.5  |
| cmk2    | YOL016C | 5.45 | 1.87 | -0.51 |
| mkk2    | YPL140C | 5.45 | 0.54 | -0.51 |
| sip1    | YDR422C | 5.42 | 1.25 | -0.53 |
| pcl6    | YER059W | 5.38 | 1.05 | -0.56 |
| inp52   | YNL106C | 5.37 | 0.88 | -0.57 |
| stt4    | YLR305C | 5.37 | 0.64 | -0.57 |
| kin28   | YDL108W | 5.36 | 2.06 | -0.58 |
| vps15   | YBR097W | 5.36 | 1.7  | -0.58 |
| ppq1    | YPL179W | 5.35 | 1.42 | -0.59 |
| erg8    | YMR220W | 5.35 | 0.41 | -0.59 |
| cdc15   | YAR019C | 5.35 | 1.08 | -0.59 |
| tep1    | YNL128W | 5.33 | 0.7  | -0.6  |
| phr2    | YIL053W | 5.31 | 0.69 | -0.62 |
| pho80   | YOL001W | 5.29 | 0.79 | -0.64 |
| mss4    | YDR208W | 5.29 | 0.43 | -0.64 |
| pcl8    | YPL219W | 5.28 | 1.14 | -0.64 |
| urk1    | YNR012W | 5.26 | 1.76 | -0.66 |
| cbk1    | YNL161W | 5.25 | 1.09 | -0.66 |
| pps1    | YBR276C | 5.24 | 1.09 | -0.67 |
| pro1    | YDR300C | 5.24 | 1.12 | -0.67 |
| pip2    | YOR363C | 5.23 | 1.55 | -0.68 |
| ssn3    | YPL042C | 5.23 | 1.01 | -0.68 |
| psr2    | YLR019W | 5.2  | 0.9  | -0.7  |
| pcl2    | YDL127W | 5.16 | 0.41 | -0.74 |
| apm3    | YBR288C | 5.16 | 1.93 | -0.74 |
| psk2    | YOL045W | 5.15 | 0.81 | -0.74 |
| kin82   | YCR091W | 5.14 | 1.65 | -0.75 |
| sok1    | YDR006C | 5.11 | 0.8  | -0.77 |
| reg1    | YDR028C | 5.09 | 0.88 | -0.79 |
| inp54   | YOL065C | 5.06 | 2.09 | -0.81 |
| ypl141c | ypl141c | 5.06 | 1.19 | -0.81 |
| ste20   | YHL007C | 5.06 | 0.56 | -0.81 |
| pak1    | YER129W | 5.06 | 0.66 | -0.81 |

|         |         |      |      |       |
|---------|---------|------|------|-------|
| ypl150w | ypl150w | 5.05 | 1.45 | -0.82 |
| gal83   | YER027C | 5.02 | 0.77 | -0.84 |
| scy1    | YGL083W | 4.97 | 1.03 | -0.88 |
| gin4    | YDR507C | 4.93 | 1.44 | -0.91 |
| hor2    | YER062C | 4.81 | 0.7  | -1    |
| tpd3    | YAL016W | 4.78 | 1.05 | -1.02 |
| bro1    | YPL084W | 4.73 | 1.97 | -1.06 |
| mck1    | YNL307C | 4.66 | 1.04 | -1.12 |
| lsp1    | YPL004C | 4.64 | 1.78 | -1.13 |
| pos5    | YPL188W | 4.64 | 1.09 | -1.13 |
| ptc1    | YDL006W | 4.6  | 2.04 | -1.16 |
| lcb4    | YOR171C | 4.59 | 0.41 | -1.17 |
| adr1    | YDR216W | 4.57 | 0.51 | -1.19 |
| pex3    | YDR329C | 4.54 | 0.9  | -1.21 |
| ptp1    | YDL230W | 4.51 | 0.7  | -1.24 |
| tps2    | YDR074W | 4.47 | 1.02 | -1.27 |
| snf1    | YDR477W | 4.39 | 0.84 | -1.33 |
| thi21   | YPL258C | 4.39 | 1.49 | -1.33 |
| sit4    | YDL047W | 4.35 | 0.93 | -1.36 |
| by4742  | by4742  | 4.22 | 1.73 | -1.46 |
| tpk2    | YPL203W | 4.15 | 1.08 | -1.51 |
| tel1    | YBL088C | 4.09 | 0.75 | -1.56 |
| snf4    | YGL115W | 4.08 | 0.83 | -1.56 |
| cdc5    | YMR001C | 3.73 | 0.65 | -1.83 |
| vps34   | YLR240W | 3.15 | 0.29 | -2.28 |
| skm1    | YOL113W | 2.93 | 1.41 | -2.45 |
| pif1    | YML061C | 2.89 | 0.25 | -2.48 |
| lcb5    | YLR260W | 2.75 | 0.63 | -2.59 |
| ypl236c | ypl236c | 2.75 | 0.26 | -2.59 |

D. Oleate 6 h

| <b>Standard name</b> | <b>Systematic name</b> | <b>Oleate 6 h</b> | <b>SD</b> | <b>Z value</b> |
|----------------------|------------------------|-------------------|-----------|----------------|
| ark1                 | YNL020C                | 20.4              | 14.68     | 4.05           |
| kin3                 | YAR018C                | 18.64             | 7.59      | 3.37           |
| yck3                 | YER123W                | 17.99             | 5.16      | 3.12           |
| sip1                 | YDR422C                | 16.32             | 11.24     | 2.48           |
| cla4                 | YNL298W                | 16.11             | 11.63     | 2.4            |
| hsl1                 | YKL101W                | 15.92             | 10.48     | 2.33           |
| hxx2                 | YGL253W                | 15.72             | 8.31      | 2.25           |
| cln3                 | YAL040C                | 15.38             | 3.63      | 2.12           |
| cdc19                | YAL038W                | 15.1              | 2.92      | 2.01           |
| elm1                 | YKL048C                | 15.02             | 8.17      | 1.98           |
| rts1                 | YOR014W                | 14.09             | 10.18     | 1.63           |

|         |         |       |      |      |
|---------|---------|-------|------|------|
| ypk1    | YKL126W | 13.67 | 9.03 | 1.47 |
| his2    | YFR025C | 13.48 | 4.9  | 1.39 |
| bud32   | YGR262C | 13.39 | 6.53 | 1.36 |
| sln1    | YIL147C | 13.3  | 7.94 | 1.32 |
| ptp3    | YER075C | 13.07 | 1.04 | 1.24 |
| psk1    | YAL017W | 12.79 | 3.5  | 1.13 |
| by4742  | by4742  | 12.51 | 0.93 | 1.02 |
| cki1    | YLR133W | 12.46 | 7.1  | 1    |
| cak1    | YFL029C | 12.3  | 2.61 | 0.94 |
| ppm1    | YDR435C | 12.23 | 2.17 | 0.92 |
| ire1    | YHR079C | 12.18 | 8.22 | 0.9  |
| yol138c | yol138c | 12.17 | 8.26 | 0.89 |
| aps3    | YJL024C | 12.16 | 7.62 | 0.89 |
| apl5    | YPL195W | 12.13 | 6.48 | 0.88 |
| dig1    | YPL049C | 12.02 | 7.86 | 0.84 |
| hdg1    | YLR113W | 12.01 | 5.8  | 0.83 |
| kgp1    | YHR082C | 11.95 | 7.59 | 0.81 |
| rrd1    | YIL153W | 11.92 | 5.99 | 0.8  |
| hom3    | YER052C | 11.91 | 3.82 | 0.79 |
| sch9    | YHR205W | 11.9  | 9.19 | 0.79 |
| pfk27   | YOL136C | 11.86 | 7.87 | 0.77 |
| inp51   | YIL002C | 11.84 | 6.65 | 0.76 |
| sho1    | YER118C | 11.84 | 2.78 | 0.76 |
| ykl171w | ykl171w | 11.82 | 7.16 | 0.76 |
| ppg1    | YNR032W | 11.8  | 7.12 | 0.75 |
| spl2    | YHR136C | 11.75 | 8.15 | 0.73 |
| apl6    | YGR261C | 11.68 | 5.41 | 0.7  |
| sap190  | YKR028W | 11.68 | 7.6  | 0.7  |
| cax4    | YGR036C | 11.67 | 3.39 | 0.7  |
| sdp1    | YIL113W | 11.67 | 7.03 | 0.7  |
| ptc2    | YER089C | 11.65 | 2.33 | 0.69 |
| ppt1    | YGR123C | 11.53 | 6.45 | 0.65 |
| yer134c | yer134c | 11.51 | 4.84 | 0.64 |
| sks1    | YPL026C | 11.48 | 8.99 | 0.63 |
| kin2    | YLR096W | 11.44 | 5.8  | 0.61 |
| pcl8    | YPL219W | 11.41 | 7.75 | 0.6  |
| reg2    | YBR050C | 11.39 | 2.45 | 0.59 |
| pkh3    | YDR466W | 11.38 | 2.76 | 0.59 |
| npr1    | YNL183C | 11.37 | 8.08 | 0.59 |
| adk2    | YER170W | 11.34 | 2.7  | 0.58 |
| dbf4    | YDR052C | 11.26 | 1.86 | 0.54 |
| prk1    | YIL095W | 11.26 | 7.07 | 0.54 |
| sat4    | YCR008W | 11.26 | 0.79 | 0.54 |

|         |         |       |      |      |
|---------|---------|-------|------|------|
| hrk1    | YOR267C | 11.25 | 6.91 | 0.54 |
| pil1    | YGR086C | 11.23 | 6.52 | 0.53 |
| ypl141c | ypl141c | 11.21 | 7.1  | 0.53 |
| pph3    | YDR075W | 11.21 | 3.49 | 0.52 |
| cmk1    | YFR014C | 11.21 | 3.69 | 0.52 |
| prp28   | YDR243C | 11.2  | 8.38 | 0.52 |
| gcn20   | YFR009W | 11.17 | 3.86 | 0.51 |
| eki1    | YDR147W | 11.17 | 1.75 | 0.51 |
| yck1    | YHR135C | 11.15 | 7.26 | 0.5  |
| tos3    | YGL179C | 11.1  | 2.19 | 0.48 |
| msg2    | YNL053W | 11.09 | 7.05 | 0.48 |
| mec1    | YBR136W | 11.02 | 6.72 | 0.45 |
| fab1    | YFR019W | 11    | 1.71 | 0.44 |
| ptc5    | YOR090C | 10.98 | 6.88 | 0.43 |
| pbs2    | YJL128C | 10.93 | 4.35 | 0.42 |
| cdc15   | YAR019C | 10.93 | 5.38 | 0.42 |
| ygk3    | YOL128C | 10.92 | 6.78 | 0.41 |
| cka2    | YOR061W | 10.92 | 4.84 | 0.41 |
| bck1    | YJL095W | 10.91 | 6.08 | 0.41 |
| ppz1    | YML016C | 10.91 | 6.47 | 0.41 |
| ynr047w | ynr047w | 10.9  | 6.64 | 0.4  |
| rck2    | YLR248W | 10.89 | 6.2  | 0.4  |
| ser2    | YGR208W | 10.88 | 6.33 | 0.4  |
| tpk3    | YKL166C | 10.86 | 6.48 | 0.39 |
| lsp1    | YPL004C | 10.86 | 8.34 | 0.39 |
| ydl025c | ydl025c | 10.84 | 2.3  | 0.38 |
| lpp1    | YDR503C | 10.82 | 1.85 | 0.37 |
| ssk2    | YNR031C | 10.82 | 6.38 | 0.37 |
| mkk1    | YOR231W | 10.81 | 5.53 | 0.37 |
| met14   | YKL001C | 10.77 | 5.19 | 0.35 |
| sac1    | YKL212W | 10.77 | 8.29 | 0.35 |
| inp53   | YOR109W | 10.76 | 7.77 | 0.35 |
| gac1    | YOR178C | 10.75 | 7.26 | 0.35 |
| pcl9    | YDL179W | 10.75 | 3.17 | 0.35 |
| vhs1    | YDR247W | 10.74 | 7.53 | 0.35 |
| kin4    | YOR233W | 10.73 | 6.38 | 0.34 |
| dun1    | YDL101C | 10.69 | 3.35 | 0.33 |
| mkk2    | YPL140C | 10.68 | 6.31 | 0.32 |
| prr2    | YDL214C | 10.67 | 0.84 | 0.32 |
| mss4    | YDR208W | 10.64 | 6.63 | 0.31 |
| rck1    | YGL158W | 10.62 | 2.97 | 0.3  |
| ygr205w | ygr205w | 10.62 | 5.33 | 0.3  |
| sip2    | YGL208W | 10.62 | 5.55 | 0.3  |

|         |         |       |      |      |
|---------|---------|-------|------|------|
| pho81   | YGR233C | 10.62 | 5.17 | 0.3  |
| ltp1    | YPR073C | 10.61 | 5.57 | 0.3  |
| fus3    | YBL016W | 10.6  | 2.96 | 0.29 |
| pyk2    | YOR347C | 10.59 | 7.45 | 0.29 |
| lcb3    | YJL134W | 10.58 | 6.34 | 0.28 |
| pak1    | YER129W | 10.54 | 1.66 | 0.27 |
| pph2    | YDL134C | 10.54 | 1.21 | 0.27 |
| ssk1    | YLR006C | 10.52 | 6.07 | 0.26 |
| cbk1    | YNL161W | 10.52 | 6.07 | 0.26 |
| ppz2    | YDR436W | 10.51 | 5.29 | 0.25 |
| ptp2    | YOR208W | 10.48 | 7.15 | 0.25 |
| pho3    | YBR092C | 10.45 | 1.57 | 0.23 |
| ste7    | YDL159W | 10.44 | 1.39 | 0.23 |
| dbf20   | YPR111W | 10.43 | 6.46 | 0.23 |
| arg5.6  | YER069W | 10.43 | 0.67 | 0.22 |
| thi20   | YOL055C | 10.39 | 6.7  | 0.21 |
| pkh2    | YOL100W | 10.39 | 7.42 | 0.21 |
| cln1    | YMR199W | 10.38 | 4.19 | 0.21 |
| hnt1    | YDL125C | 10.37 | 1.61 | 0.2  |
| dog1    | YHR044C | 10.36 | 4.58 | 0.2  |
| utr1    | YJR049C | 10.31 | 5.43 | 0.18 |
| pho5    | YBR093C | 10.25 | 1.85 | 0.16 |
| ypl150w | ypl150w | 10.24 | 6.31 | 0.15 |
| thi22   | YPR121W | 10.23 | 7.32 | 0.15 |
| chk1    | YBR274W | 10.22 | 1.3  | 0.15 |
| pph21   | YDL134C | 10.22 | 1.47 | 0.14 |
| kcc4    | YCL024W | 10.22 | 1.65 | 0.14 |
| ppe1    | YHR075C | 10.21 | 5.04 | 0.14 |
| ypr161c | ypr161c | 10.18 | 4.69 | 0.13 |
| ptc4    | YBR125C | 10.17 | 2.32 | 0.13 |
| ptc7    | YHR076W | 10.17 | 5.97 | 0.12 |
| cmk2    | YOL016C | 10.15 | 5.99 | 0.12 |
| kkq8    | YKL168C | 10.09 | 5.22 | 0.1  |
| ppq1    | YPL179W | 10.07 | 5.92 | 0.09 |
| ckb1    | YGL019W | 10.06 | 3.57 | 0.08 |
| alk1    | YGL021W | 10.06 | 2.93 | 0.08 |
| thi21   | YPL258C | 10.04 | 7.4  | 0.07 |
| ycr079w | ycr079w | 10.02 | 1.26 | 0.07 |
| ssu72   | YNL222W | 10.02 | 6.77 | 0.07 |
| inp54   | YOL065C | 10    | 6.33 | 0.06 |
| dig2    | YDR480W | 9.99  | 2.96 | 0.06 |
| ime2    | YJL106W | 9.97  | 5.04 | 0.05 |
| stt4    | YLR305C | 9.94  | 6.04 | 0.04 |

|         |         |      |      |       |
|---------|---------|------|------|-------|
| kin1    | YDR122W | 9.92 | 1.09 | 0.03  |
| dak2    | YFL053W | 9.89 | 1.3  | 0.02  |
| smk1    | YPR054W | 9.88 | 4.78 | 0.01  |
| ysr3    | YKR053C | 9.87 | 4.32 | 0.01  |
| bck2    | YER167W | 9.81 | 3.35 | -0.01 |
| iks1    | YJL057C | 9.81 | 4.44 | -0.01 |
| ybr028c | ybr028c | 9.79 | 2.96 | -0.02 |
| pho8    | YDR481C | 9.71 | 3.61 | -0.05 |
| tpk1    | YJL164C | 9.71 | 5.35 | -0.05 |
| kss1    | YGR040W | 9.71 | 2.97 | -0.05 |
| urk1    | YNR012W | 9.63 | 5.82 | -0.08 |
| psk2    | YOL045W | 9.63 | 5.83 | -0.08 |
| hec1    | YIL144W | 9.59 | 1.28 | -0.1  |
| apm3    | YBR288C | 9.59 | 2.22 | -0.1  |
| pcl2    | YDL127W | 9.57 | 5.65 | -0.11 |
| dak1    | YML070W | 9.56 | 4.32 | -0.11 |
| mps1    | YDL028C | 9.48 | 0.78 | -0.14 |
| ymr291w | ymr291w | 9.46 | 3.55 | -0.15 |
| hal5    | YJL165C | 9.46 | 5.64 | -0.15 |
| rio1    | YOR119C | 9.45 | 5.37 | -0.15 |
| dog2    | YHR043C | 9.42 | 5.03 | -0.16 |
| tpp1    | YMR156C | 9.39 | 2.63 | -0.17 |
| cka1    | YIL035C | 9.38 | 4.8  | -0.18 |
| rbs1    | YDL189W | 9.37 | 1.16 | -0.18 |
| dpp1    | YDR284C | 9.33 | 0.78 | -0.2  |
| pkh1    | YDR490C | 9.3  | 5.24 | -0.21 |
| tor2    | YKL203C | 9.3  | 6.36 | -0.21 |
| ptk1    | YKL198C | 9.3  | 4.9  | -0.21 |
| kin82   | YCR091W | 9.27 | 1.01 | -0.22 |
| atg1    | YGL180W | 9.2  | 2.79 | -0.25 |
| hrr25   | YPL204W | 9.16 | 4.67 | -0.26 |
| gcn2    | YDR283C | 9.11 | 2.48 | -0.28 |
| bro1    | YPL084W | 9.1  | 4.94 | -0.28 |
| xks1    | YGR194C | 9.1  | 4.63 | -0.29 |
| adk1    | YDR226W | 9.04 | 3.74 | -0.31 |
| arg82   | YDR173C | 9    | 3.15 | -0.32 |
| mlp1    | YKL161C | 9    | 4.26 | -0.32 |
| ssk22   | YCR073C | 8.99 | 1.53 | -0.33 |
| ptk2    | YJR059W | 8.97 | 5.08 | -0.33 |
| sfk1    | YKL051W | 8.92 | 5.62 | -0.36 |
| mrk1    | YDL079C | 8.9  | 0.71 | -0.36 |
| glc8    | YMR311C | 8.86 | 3.02 | -0.38 |
| erg12   | YMR208W | 8.81 | 1.66 | -0.4  |

|        |         |      |      |       |
|--------|---------|------|------|-------|
| ckb2   | YOR039W | 8.81 | 5.8  | -0.4  |
| yak1   | YJL141C | 8.69 | 5.24 | -0.44 |
| pro1   | YDR300C | 8.68 | 2.69 | -0.44 |
| siw14  | YNL032W | 8.68 | 4.65 | -0.45 |
| psr1   | YLL010C | 8.66 | 4.59 | -0.45 |
| erg8   | YMR220W | 8.62 | 3.58 | -0.47 |
| thr1   | YHR025W | 8.59 | 3.98 | -0.48 |
| ynk1   | YKL067W | 8.59 | 4.72 | -0.48 |
| ptc1   | YDL006W | 8.53 | 1.8  | -0.5  |
| tsl1   | YML100W | 8.51 | 3.39 | -0.51 |
| pcl6   | YER059W | 8.47 | 2.3  | -0.53 |
| rom1   | YGR070W | 8.43 | 2.74 | -0.54 |
| lsb6   | YJL100W | 8.4  | 3.79 | -0.55 |
| kns1   | YLL019C | 8.36 | 3.27 | -0.57 |
| scy1   | YGL083W | 8.17 | 3.28 | -0.64 |
| akl1   | YBR059C | 8.14 | 1.19 | -0.65 |
| phr2   | YIL053W | 8.1  | 4.54 | -0.67 |
| pps1   | YBR276C | 8.08 | 1.65 | -0.68 |
| mih1   | YMR036C | 8.05 | 3.74 | -0.69 |
| pos5   | YPL188W | 8.01 | 3.53 | -0.7  |
| hor2   | YER062C | 7.99 | 2.39 | -0.71 |
| vps15  | YBR097W | 7.9  | 2.88 | -0.74 |
| dbf2   | YGR092W | 7.89 | 3.38 | -0.75 |
| gal83  | YER027C | 7.72 | 1.51 | -0.81 |
| pcl1   | YNL289W | 7.7  | 4.31 | -0.82 |
| kin28  | YDL108W | 7.7  | 1.79 | -0.82 |
| sic1   | YLR079W | 7.64 | 3.45 | -0.84 |
| yvn1   | YIR026C | 7.56 | 2.94 | -0.87 |
| prr1   | YKL116C | 7.29 | 4.41 | -0.98 |
| pho85  | YPL031C | 7.24 | 4.14 | -1    |
| sok1   | YDR006C | 7.21 | 0.87 | -1.01 |
| ypk2   | YMR104C | 7.21 | 2.22 | -1.01 |
| ado1   | YJR105W | 7.12 | 1.54 | -1.04 |
| vhs3   | YOR054C | 7.06 | 4.39 | -1.06 |
| ste20  | YHL007C | 7.05 | 3.27 | -1.07 |
| tep1   | YNL128W | 7.05 | 3.13 | -1.07 |
| inp52  | YNL106C | 7.04 | 3.64 | -1.07 |
| sap185 | YJL098W | 6.9  | 2.64 | -1.13 |
| tps3   | YMR261C | 6.76 | 2.06 | -1.18 |
| tor1   | YJR066W | 6.74 | 1.6  | -1.19 |
| ssn3   | YPL042C | 6.69 | 0.87 | -1.21 |
| pho80  | YOL001W | 6.55 | 3.22 | -1.26 |
| tpk2   | YPL203W | 6.3  | 2.48 | -1.36 |

|         |         |      |      |       |
|---------|---------|------|------|-------|
| ptp1    | YDL230W | 6.27 | 0.52 | -1.37 |
| yhr1    | YHR111W | 6.26 | 2.96 | -1.37 |
| tps2    | YDR074W | 6.15 | 1.34 | -1.42 |
| lcb4    | YOR171C | 6.01 | 3.14 | -1.47 |
| ctk1    | YKL139W | 5.65 | 1.65 | -1.61 |
| mck1    | YNL307C | 5.5  | 1.94 | -1.66 |
| reg1    | YDR028C | 5.24 | 0.48 | -1.76 |
| snf1    | YDR477W | 5.19 | 0.8  | -1.78 |
| ctk3    | YML112W | 4.84 | 1.45 | -1.92 |
| gin4    | YDR507C | 4.78 | 1.28 | -1.94 |
| pex3    | YDR329C | 6.93 | 3.82 | -1.12 |
| adr1    | YDR216W | 4.96 | 1.13 | -1.87 |
| pip2    | YOR363C | 4.61 | 1.2  | -2    |
| snf4    | YGL115W | 4.28 | 0.43 | -2.13 |
| sit4    | YDL047W | 4    | 0.54 | -2.24 |
| psr2    | YLR019W | 3.73 | 1.04 | -2.34 |
| tel1    | YBL088C | 3.41 | 0.81 | -2.46 |
| ypl236c | ypl236c | 2.99 | 0.39 | -2.63 |
| cdc5    | YMR001C | 2.85 | 0.69 | -2.68 |
| skm1    | YOL113W | 2.81 | 1.5  | -2.69 |
| pif1    | YML061C | 2.76 | 0.5  | -2.72 |
| lcb5    | YLR260W | 2.69 | 0.68 | -2.74 |
| vps34   | YLR240W | 2.58 | 0.76 | -2.78 |

---



Table S2. Quantification of peroxisome biogenesis

|                        |                 | <b>1</b> | <b>2</b> | <b>3</b> | <b>4</b> | <b>5</b> | <b>6</b>  | <b>7</b>    | <b>8</b>   | <b>9</b>                     | <b>10</b>                | <b>11</b>             | <b>12</b>                | <b>13</b>                                               | <b>14</b>          | <b>15</b>                    |
|------------------------|-----------------|----------|----------|----------|----------|----------|-----------|-------------|------------|------------------------------|--------------------------|-----------------------|--------------------------|---------------------------------------------------------|--------------------|------------------------------|
| <b>Systematic name</b> | <b>Name</b>     | <b>0</b> | <b>2</b> | <b>4</b> | <b>6</b> | <b>8</b> | <b>20</b> | <b>YPBM</b> | <b>YPD</b> | <b>Storage carbohydrates</b> | <b>mol gene function</b> | <b>Mean cell area</b> | <b>Peroxisome volume</b> | <b>Peroxisome number per <math>\mu\text{m}^2</math></b> | <b>Un-coupling</b> | <b>Peroxisome morphology</b> |
|                        |                 | <i>h</i> | <i>h</i> | <i>h</i> | <i>h</i> | <i>h</i> | <i>h</i>  |             |            |                              |                          | <i>pixels</i>         | $\mu\text{m}^3$          |                                                         |                    |                              |
| BY4742                 | BY4742          | 0        | 0.1321   | 2.4188   | 17.4965  | 33.846   | 70.299    | 1           | 1          | 0.5                          | 0                        | 1246.3                | 1.56697                  | 0.12854                                                 | 0                  | 0                            |
| BY4742                 | BY4742          | 0        | 1.0826   | 8.3576   | 26.973   | 42.086   | 71.881    | 1           | 1          | 0.5                          | 0                        | 1233.6                | 0.48577                  | 0.11167                                                 | 0                  | 0                            |
| BY4742                 | BY4742          | 0.05482  | 7.02955  | 31.12588 | 57.63017 | 84.54483 | 130.0752  | 1           | 1          | 0.5                          | 0                        | 1414.61               | 1.47036                  | 0.11505                                                 | 0                  | 0                            |
| BY4742                 | BY4742          | 0        | 2.21012  | 18.21624 | 36.98353 | 59.21318 | 106.4552  | 1           | 1          | 0.5                          | 0                        | 1475.64               | 0.92607                  | 0.12136                                                 | 0                  | 0                            |
| BY4742                 | BY4742          | 0.12046  | 9.52677  | 28.13674 | 55.78037 | 69.81995 | 129.5093  | 1           | 1          | 0.5                          | 0                        | 1474.66               | 1.04735                  | 0.12179                                                 | 0                  | 0                            |
| YAL016W                | <i>tpd3Δ</i>    | 0        | 0.01453  | 0.44048  | 2.47826  | 8.96908  | 53.35717  | 0           | 1          | 0                            | 3                        | 1911.86               | 0.4921                   | 0.10167                                                 | 0                  | -0.7                         |
| YAL017W                | <i>psk1Δ</i>    | 0.45644  | 9.61278  | 28.50746 | 54.156   | 74.5051  | 114.4776  | 1           | 1          | 0.5                          | 1                        | 1245.25               | 1.38952                  | 0.09342                                                 | 0                  | 0                            |
| YAL040C                | <i>cln3Δ</i>    | 0.0026   | 3.89429  | 32.52782 | 71.07845 | 97.75778 | 170.6199  | 1           | 1          | 0.5                          | 5                        | 1938.59               | 1.53998                  | 0.06632                                                 | 0                  | 0.7                          |
| YAR018C                | <i>kin3Δ</i>    | 0.09308  | 9.20028  | 37.98205 | 64.69037 | 90.72012 | 140.6272  | 1           | 1          | 0.5                          | 1                        | 1453.69               | 1.0049                   | 0.10283                                                 | 0                  | 0                            |
| YBL016W                | <i>fus3Δ</i>    | 0.0452   | 5.28151  | 23.80784 | 48.61174 | 50.46937 | 119.3013  | 1           | 1          | 0.5                          | 1                        | 1262.32               | 1.41619                  | 0.12125                                                 | 0                  | 0                            |
| YBL088C                | <i>tel1Δ</i>    | 0        | 0.04494  | 0        | 0.23131  | 0.30978  | 2.19546   | 1           | 1          | 0.5                          | 1                        | 1548.79               | 2.72675                  | 0.04941                                                 | 0                  | 0.7                          |
| YBR028C                | <i>ybr028cΔ</i> | 0.06233  | 2.80893  | 17.14933 | 42.86671 | 58.24718 | 120.5092  | 1           | 1          | 0.5                          | 1                        | 1374.93               | 0.83949                  | 0.10056                                                 | 0                  | 0                            |
| YBR050C                | <i>reg2Δ</i>    | 0.95907  | 2.24553  | 14.82361 | 30.95668 | 47.26335 | 75.23834  | 1           | 1          | 0.5                          | 5                        | 1395.9                | 0.84916                  | 0.11623                                                 | 0                  | 0                            |
| YBR059C                | <i>akl1Δ</i>    | 0        | 0.03003  | 7.28361  | 21.66501 | 41.62284 | 128.6266  | 1           | 1          | 0.5                          | 1                        | 1906.41               | 1.61361                  | 0.0463                                                  | 0                  | 0.7                          |
| YBR092C                | <i>pho3Δ</i>    | 0        | 0.02044  | 0.81429  | 4.22368  | 5.57421  | 61.2757   | 1           | 1          | 0.5                          | 3                        | 1350.94               | 1.61777                  | 0.08422                                                 | 0                  | 0                            |
| YBR093C                | <i>pho5Δ</i>    | 0        | 0.07872  | 9.89171  | 36.94947 | 44.30173 | 87.69179  | 1           | 1          | 0.5                          | 3                        | 1404.21               | 0.82944                  | 0.07884                                                 | 0                  | 0                            |
| YBR097W                | <i>vps15Δ</i>   | 0.00423  | 1.28933  | 7.21345  | 17.12913 | 22.72014 | 84.00355  | 0           | 0          | 0.5                          | 1                        | 1395.6                | 0.69751                  | 0.09761                                                 | 0                  | -0.7                         |
| YBR125C                | <i>ptc4Δ</i>    | 0        | 0.0269   | 1.73927  | 15.63626 | 31.63867 | 92.05227  | 1           | 1          | 0.5                          | 3                        | 1300                  | 0.76098                  | 0.10793                                                 | 0                  | 0                            |
| YBR274W                | <i>chk1Δ</i>    | 0        | 1.37609  | 16.05528 | 63.40313 | 88.35144 | 138.8244  | 1           | 1          | 0.5                          | 1                        | 1912.14               | 0.97108                  | 0.12114                                                 | 0                  | -0.7                         |
| YBR276C                | <i>pps1Δ</i>    | 0        | 0.3125   | 7.71615  | 17.93992 | 31.3877  | 83.4746   | 1           | 1          | 0.5                          | 3                        | 1412.27               | 0.94641                  | 0.08598                                                 | 0                  | 0                            |
| YBR288C                | <i>apm3Δ</i>    | 0        | 0.01888  | 0.72749  | 4.81091  | 5.36371  | 21.94497  | 1           | 1          | 1                            | 5                        | 1278.35               | 1.70916                  | 0.06625                                                 | 0                  | 0.7                          |
| YCL024W                | <i>kcc4Δ</i>    | 0        | 0.01413  | 2.50949  | 13.01103 | 30.11947 | 80.25453  | 1           | 1          | 0.5                          | 1                        | 1333.92               | 0.89887                  | 0.0765                                                  | 0                  | 0                            |
| YCR008W                | <i>sat4Δ</i>    | 0        | 2.95461  | 19.9164  | 39.58587 | 55.32078 | 94.12014  | 1           | 1          | 0.5                          | 1                        | 1382.27               | 0.60428                  | 0.10077                                                 | 0                  | 0                            |
| YCR073C                | <i>ssk22Δ</i>   | 0        | 4.22217  | 11.51228 | 22.94819 | 36.13374 | 64.0362   | 1           | 1          | 0.5                          | 1                        | 1240                  | 1.14862                  | 0.12714                                                 | 0                  | 0                            |
| YCR079W                | <i>ycr079wΔ</i> | 0        | 0.07545  | 6.18032  | 21.10671 | 266.6078 | 94.5352   | 1           | 1          | 1                            | 3                        | 1429.8                | 0.69348                  | 0.11597                                                 | 1                  | 0                            |
| YCR091W                | <i>kin82Δ</i>   | 0.00768  | 2.59492  | 14.06844 | 23.78662 | 60.11999 | 105.9641  | 1           | 1          | 0.5                          | 1                        | 1297.36               | 0.76728                  | 0.08652                                                 | 0                  | 0                            |
| YDL006W                | <i>ptc1Δ</i>    | 0        | 0.06898  | 1.58708  | 7.139    | 20.38914 | 47.90364  | 0.5         | 1          | 0.5                          | 3                        | 1680.7                | 0.55653                  | 0.0677                                                  | 0                  | -0.9                         |
| YDL025C                | <i>yd1025cΔ</i> | 0        | 0.00522  | 0.95848  | 5.96884  | 5.96884  | 60.83621  | 1           | 1          | 1                            | 1                        | 1561.71               | 1.55116                  | 0.06567                                                 | 0                  | 0.7                          |
| YDL047W                | <i>sit4Δ</i>    | 0        | 0.12186  | 7.722    | 22.13632 | 45.63939 | 110.6057  | 1           | 0          | 0.5                          | 3                        | 1758.6                | 0.33588                  | 0.10125                                                 | 0                  | -0.7                         |
| YDL079C                | <i>mrk1Δ</i>    | 0.0385   | 11.21352 | 34.67861 | 58.03322 | 67.27941 | 92.11429  | 1           | 1          | 0.5                          | 1                        | 1392.74               | 0.89952                  | 0.08462                                                 | 0                  | 0                            |
| YDL101C                | <i>dun1Δ</i>    | 0        | 0.29106  | 5.91306  | 20.62058 | 42.00754 | 78.56387  | 1           | 1          | 0.5                          | 1                        | 1424.93               | 0.62413                  | 0.10061                                                 | 0                  | 0                            |
| YDL125C                | <i>hnt1Δ</i>    | 0        | 0.02996  | 4.39487  | 24.27351 | 39.62741 | 97.29288  | 1           | 1          | 0.5                          | 5                        | 1560.22               | 0.73505                  | 0.09483                                                 | 0                  | 0                            |
| YDL134C                | <i>pph21Δ</i>   | 0        | 4.35587  | 27.0613  | 51.16159 | 73.19218 | 167.1858  | 1           | 1          | 0.5                          | 3                        | 2086.82               | 2.35628                  | 0.05697                                                 | 0                  | 0.7                          |
| YDL159W                | <i>ste7Δ</i>    | 0        | 0.00634  | 2.36921  | 11.95571 | 28.27084 | 122.1455  | 1           | 1          | 0.5                          | 1                        | 1576.76               | 1.96609                  | 0.10516                                                 | 0                  | 0                            |
| YDL179W                | <i>pcl9Δ</i>    | 0        | 0.00696  | 0.8786   | 3.64871  | 7.24172  | 96.40851  | 1           | 1          | 0.5                          | 5                        | 1278.25               | 2.05342                  | 0.09061                                                 | 0                  | 0.9                          |
| YDL189W                | <i>rbs1Δ</i>    | 0        | 0.1454   | 7.10041  | 23.93372 | 56.27027 | 81.23479  | 1           | 1          | 0.5                          | 5                        | 1425.47               | 0.63032                  | 0.09378                                                 | 0                  | 0                            |
| YDL214C                | <i>prp2Δ</i>    | 0.02059  | 8.09044  | 33.55815 | 42.00699 | 66.4245  | 110.9122  | 1           | 1          | 0.5                          | 1                        | 1289.07               | 0.94147                  | 0.12072                                                 | 0                  | 0                            |
| YDL230W                | <i>ptp1Δ</i>    | 0        | 0        | 1.25848  | 5.86039  | 14.22527 | 67.2524   | 1           | 1          | 0.5                          | 3                        | 1624.85               | 0.3525                   | 0.08509                                                 | 0                  | -0.7                         |
| YDR006C                | <i>sok1Δ</i>    | 0        | 1.05962  | 12.22353 | 26.80482 | 38.53896 | 75.26046  | 1           | 1          | 0.5                          | 5                        | 1387.11               | 1.06151                  | 0.09526                                                 | 0                  | 0                            |
| YDR028C                | <i>reg1Δ</i>    | 0        | 0.00408  | 0.16108  | 1.28789  | 1.73411  | 3.8981    | 0           | 1          | 1                            | 5                        | 1380.24               | 0.03596                  | 0.14786                                                 | 0                  | -0.9                         |

|         |                 |          |          |          |          |          |          |      |   |     |   |         |         |         |   |      |
|---------|-----------------|----------|----------|----------|----------|----------|----------|------|---|-----|---|---------|---------|---------|---|------|
| YDR074W | <i>tps2Δ</i>    | 0        | 0        | 0.02498  | 0.0105   | 5.6332   | 13.3053  | 0.5  | 1 | 0   | 4 | 1985.47 | 0.85936 | 0.06321 | 0 | -0.9 |
| YDR075W | <i>pph3Δ</i>    | 0        | 0.34957  | 17.76477 | 49.45817 | 75.59504 | 138.388  | 1    | 1 | 0.5 | 3 | 1909.85 | 0.7857  | 0.08754 | 0 | 0    |
| YDR122W | <i>kin1Δ</i>    | 0.06381  | 9.88983  | 33.4433  | 56.97313 | 74.41328 | 77.92978 | 1    | 1 | 0   | 1 | 1280.32 | 0.60787 | 0.11118 | 0 | 0    |
| YDR147W | <i>eki1Δ</i>    | 0        | 0        | 2.45297  | 9.3262   | 16.94993 | 120.2984 | 1    | 1 | 0.5 | 2 | 1351.3  | 1.78529 | 0.07325 | 0 | 0.7  |
| YDR173C | <i>arg82Δ</i>   | 0        | 0        | 9.44766  | 29.12273 | 44.84355 | 90.99408 | 0.25 | 1 | 0   | 2 | 1285    | 1.52748 | 0.08735 | 0 | 0    |
| YDR226W | <i>adk1Δ</i>    | 0.11334  | 0        | 4.76678  | 11.20765 | 22.63014 | 72.65092 | 0.25 | 1 | 1   | 2 | 2034.07 | 0.39053 | 0.13745 | 0 | -0.7 |
| YDR247W | <i>vhs1Δ</i>    | 0.01884  | 7.20441  | 25.64324 | 60.51195 | 70.23766 | 118.568  | 1    | 1 | 1   | 1 | 1417.19 | 0.8088  | 0.09504 | 0 | 0    |
| YDR283C | <i>gcn2Δ</i>    | 0.26578  | 9.88021  | 38.36064 | 57.16623 | 63.57012 | 108.3466 | 1    | 1 | 0.5 | 1 | 1482.23 | 1.08617 | 0.10877 | 0 | 0    |
| YDR284C | <i>dpp1Δ</i>    | 0.24841  | 3.57026  | 22.71235 | 47.15724 | 59.04779 | 85.88049 | 1    | 1 | 0.5 | 4 | 1419.14 | 1.08674 | 0.07909 | 0 | 0    |
| YDR300C | <i>pro1Δ</i>    | 0        | 0.17255  | 3.85283  | 9.85922  | 16.2465  | 51.46376 | 1    | 1 | 0   | 2 | 1334.33 | 0.78817 | 0.08756 | 0 | 0    |
| YDR329C | <i>pex3Δ</i>    | 0        | 0        | 0.03332  | 2.86894  | 17.96725 | 28.22858 | 0.25 | 1 | 0.5 | 5 | 1450.48 | -       | -       | 0 | -1   |
| YDR422C | <i>sip1Δ</i>    | 0.04227  | 23.80983 | 71.08882 | 123.8161 | 111.6188 | 164.3497 | 1    | 1 | 0.5 | 1 | 1846.09 | 2.4494  | 0.12354 | 0 | 0.9  |
| YDR435C | <i>ppm1Δ</i>    | 0.07294  | 0.41643  | 9.87104  | 26.9752  | 37.04561 | 115.2318 | 0.25 | 1 | 0.5 | 5 | 1470    | 1.25316 | 0.08989 | 0 | 0    |
| YDR436W | <i>ppz2Δ</i>    | 0        | 0.1352   | 2.47897  | 11.4556  | 16.37895 | 101.163  | 1    | 1 | 0.5 | 3 | 1536.29 | 1.48999 | 0.08535 | 0 | 0    |
| YDR466W | <i>pkh3Δ</i>    | 0.00883  | 6.19872  | 25.73937 | 49.1855  | 60.3778  | 105.7765 | 1    | 1 | 0.5 | 1 | 1356.95 | 1.31942 | 0.08761 | 0 | 0    |
| YDR477W | <i>snf1Δ</i>    | 0        | 0        | 0        | 0.05765  | 0.13417  | 5.99922  | 0    | 1 | 0   | 1 | 1604.24 | 0.07993 | 0.04643 | 0 | -0.9 |
| YDR480W | <i>dig2Δ</i>    | 0.10206  | 3.82154  | 22.6247  | 39.96094 | 61.27797 | 91.95111 | 1    | 1 | 0.5 | 5 | 1163.86 | 0.92873 | 0.11705 | 0 | 0    |
| YDR481C | <i>pho8Δ</i>    | 0.07339  | 0.41994  | 10.0539  | 27.19415 | 37.36341 | 116.2905 | 1    | 1 | 0.5 | 3 | 1242.26 | 0.91602 | 0.12978 | 0 | 0    |
| YDR490C | <i>pkh1Δ</i>    | 0        | 0.18778  | 3.06916  | 14.09932 | 20.99698 | 59.18177 | 1    | 1 | 0.5 | 1 | 1249.29 | 0.29694 | 0.12088 | 0 | -0.7 |
| YDR503C | <i>lpp1Δ</i>    | 0.00547  | 5.43883  | 26.80388 | 54.07548 | 69.52511 | 119.8595 | 1    | 1 | 0.5 | 4 | 1265.03 | 1.33179 | 0.0976  | 0 | 0    |
| YDR507C | <i>gin4Δ</i>    | 0        | 0        | 0        | 0        | 0        | 0        | 0    | 1 | 0   | 1 | 1365.14 | -       | -       | 0 | -1   |
| YDR523C | <i>sps1Δ</i>    | 0        | 0.01025  | 2.9081   | 7.51292  | 13.76953 | 21.72372 | 0    | 0 | 0.5 | 1 | 2934.5  | 0.07006 | 0.05094 | 0 | -0.9 |
| YER027C | <i>gal83Δ</i>   | 0        | 4.5246   | 26.3622  | 35.94534 | 51.25259 | 105.2066 | 1    | 1 | 0.5 | 1 | 1353.04 | 1.07026 | 0.0856  | 0 | 0    |
| YER052C | <i>hom3Δ</i>    | 0.31661  | 3.00667  | 16.48305 | 32.07432 | 29.81816 | 94.59262 | 1    | 1 | 0.5 | 2 | 1359.17 | 0.67295 | 0.12613 | 0 | 0    |
| YER059W | <i>pcl6Δ</i>    | 0        | 0        | 6.25693  | 20.75411 | 38.62299 | 100.8309 | 1    | 1 | 0.5 | 5 | 1299.76 | 0.79228 | 0.1107  | 0 | 0    |
| YER062C | <i>hor2Δ</i>    | 0        | 0.00202  | 0.4294   | 9.42612  | 22.32595 | 86.02045 | 1    | 1 | 0.5 | 4 | 1420.36 | 0.74575 | 0.07903 | 0 | 0    |
| YER069W | <i>arg5,6Δ</i>  | 0.04749  | 5.02936  | 20.53774 | 39.48741 | 57.13952 | 124.175  | 1    | 1 | 0.5 | 2 | 1208.88 | 1.24545 | 0.11564 | 0 | 0    |
| YER075C | <i>ptp3Δ</i>    | 0        | 0.18288  | 2.47883  | 11.29628 | 17.31851 | 127.5574 | 1    | 1 | 0.5 | 3 | 1379.9  | 1.03124 | 0.12349 | 0 | 0    |
| YER089C | <i>ptc2Δ</i>    | 0.35236  | 3.63306  | 19.0821  | 39.61488 | 62.93049 | 99.81038 | 1    | 1 | 0.5 | 3 | 1516.88 | 0.54041 | 0.09754 | 0 | 0    |
| YER118C | <i>sho1Δ</i>    | 0.42763  | 12.56587 | 38.92553 | 47.96465 | 80.18138 | 131.2118 | 1    | 1 | 0.5 | 5 | 1612.63 | 1.07585 | 0.10504 | 0 | 0    |
| YER123W | <i>yck3Δ</i>    | 0        | 0.14387  | 3.01041  | 18.41792 | 39.31006 | 128.2806 | 0.5  | 1 | 0.5 | 1 | 1618.91 | 2.41676 | 0.05484 | 0 | 0.7  |
| YER129W | <i>pak1Δ</i>    | 0        | 0.36748  | 10.91258 | 38.48195 | 48.01353 | 125.0883 | 0.5  | 1 | 0.5 | 1 | 1764.74 | 0.53977 | 0.11362 | 0 | -0.7 |
| YER134C | <i>yer134cΔ</i> | 0.00113  | 3.22223  | 16.07335 | 44.45171 | 51.9159  | 110.2745 | 1    | 1 | 0.5 | 5 | 1431.48 | 0.97143 | 0.08554 | 0 | 0    |
| YER167W | <i>bck2Δ</i>    | 0        | 0.03132  | 2.53568  | 9.65479  | 31.53429 | 138.9401 | 0.25 | 1 | 0.5 | 5 | 1485.84 | 1.34658 | 0.08001 | 0 | 0    |
| YER170W | <i>adk2Δ</i>    | 0        | 0.0117   | 6.194    | 13.602   | 27.509   | 103.619  | 0.5  | 1 | 0.5 | 2 | 1281.53 | 1.31433 | 0.10431 | 0 | 0    |
| YFL053W | <i>dak2Δ</i>    | 0        | 0        | 0.61416  | 5.96374  | 15.08587 | 48.41883 | 0.25 | 1 | 0.5 | 2 | 1108.65 | 0.46131 | 0.10861 | 0 | -0.7 |
| YFR009W | <i>gcn20Δ</i>   | 0        | 0.14637  | 6.25135  | 25.2564  | 44.82371 | 76.22152 | 1    | 1 | 0.5 | 5 | 1260.8  | 0.84608 | 0.09267 | 0 | 0    |
| YFR014C | <i>cmk1Δ</i>    | 0        | 0.03438  | 0.67342  | 2.98343  | 8.63152  | 48.16274 | 1    | 1 | 0.5 | 1 | 1403.93 | 1.52984 | 0.06868 | 0 | 0.7  |
| YFR019W | <i>fab1Δ</i>    | 0        | 0.79078  | 16.10185 | 35.67805 | 53.23898 | 71.46351 | 0.5  | 1 | 0.5 | 2 | 1583.81 | 0.42065 | 0.10373 | 0 | -0.7 |
| YFR025C | <i>his2Δ</i>    | 0.21863  | 9.01387  | 37.54111 | 54.1804  | 74.85955 | 132.804  | 1    | 1 | 0.5 | 4 | 1251.75 | 1.72198 | 0.10557 | 0 | 0    |
| YGL019W | <i>ckb1Δ</i>    | 0        | 0.05069  | 1.91735  | 7.16882  | 15.39493 | 93.27278 | 1    | 1 | 0.5 | 5 | 1372.93 | 1.29043 | 0.12003 | 0 | 0    |
| YGL021W | <i>alk1Δ</i>    | 0        | 0.03221  | 3.44398  | 15.16701 | 23.10369 | 41.78077 | 1    | 1 | 0.5 | 1 | 1351.32 | 1.19331 | 0.08835 | 0 | 0    |
| YGL083W | <i>scy1Δ</i>    | 0        | 3.22008  | 18.63046 | 26.81888 | 46.05886 | 90.10244 | 1    | 1 | 0.5 | 5 | 1472.09 | 0.99857 | 0.08526 | 0 | 0    |
| YGL115W | <i>snf4Δ</i>    | 0        | 0        | 0.13608  | 0.10882  | 0.15316  | 2.2895   | 0    | 1 | 0   | 5 | 1928.55 | 0.06105 | 0.0381  | 0 | -0.9 |
| YGL158W | <i>rck1Δ</i>    | 12.69894 | 0.10018  | 6.3216   | 24.05073 | 41.65961 | 82.19894 | 1    | 1 | 0.5 | 1 | 1242.12 | 0.85015 | 0.0994  | 1 | 0    |
| YGL179C | <i>tos3Δ</i>    | 0.00116  | 0.41453  | 9.23266  | 25.81304 | 29.7371  | 107.0187 | 1    | 1 | 0.5 | 1 | 1366.79 | 1.08143 | 0.09631 | 0 | 0    |
| YGL180W | <i>atg1Δ</i>    | 0        | 2.97822  | 23.08032 | 38.40453 | 64.30096 | 102.3145 | 1    | 1 | 0.5 | 1 | 1475.96 | 0.98729 | 0.08331 | 0 | 0    |
| YGL208W | <i>sip2Δ</i>    | 0.0121   | 5.92735  | 29.55939 | 53.09188 | 54.17102 | 103.0033 | 1    | 1 | 0.5 | 1 | 1518.79 | 0.92949 | 0.0823  | 0 | 0    |

|         |                 |         |          |          |          |          |          |      |   |     |   |         |         |         |   |      |
|---------|-----------------|---------|----------|----------|----------|----------|----------|------|---|-----|---|---------|---------|---------|---|------|
| YGL253W | <i>hxx2Δ</i>    | 0       | 6.11946  | 31.15828 | 59.53928 | 87.32481 | 149.8667 | 1    | 1 | 0.5 | 2 | 1775.76 | 1.20857 | 0.0997  | 0 | 0    |
| YGR036C | <i>cax4Δ</i>    | 0       | 0        | 2.12914  | 4.42452  | 12.20832 | 110.1834 | 0.5  | 0 | 1   | 3 | 1134    | 1.62848 | 0.18761 | 0 | 1    |
| YGR040W | <i>kss1Δ</i>    | 0.07312 | 10.36857 | 32.13913 | 52.48232 | 59.97942 | 114.6401 | 1    | 1 | 0.5 | 1 | 1240.77 | 1.16438 | 0.169   | 0 | 0    |
| YGR070W | <i>rom1Δ</i>    | 0.00249 | 0.20083  | 9.62573  | 32.4813  | 43.93452 | 139.1292 | 1    | 1 | 0.5 | 5 | 1404.7  | 1.15409 | 0.14129 | 0 | 0    |
| YGR086C | <i>pil1Δ</i>    | 0.00518 | 7.75703  | 31.65218 | 44.24804 | 55.84986 | 95.01166 | 1    | 1 | 0.5 | 5 | 1434.28 | 0.81828 | 0.09747 | 0 | 0    |
| YGR092W | <i>dbf2Δ</i>    | 0       | 0        | 0.22312  | 2.9522   | 9.43749  | 106.8986 | 0.5  | 1 | 1   | 1 | 1809.2  | 1.31759 | 0.04738 | 0 | 0.7  |
| YGR123C | <i>ppt1Δ</i>    | 0       | 0.11561  | 7.9865   | 23.47629 | 24.36045 | 71.1099  | 1    | 1 | 0.5 | 3 | 1361    | 2.4313  | 0.0731  | 0 | 0.7  |
| YGR194C | <i>xks1Δ</i>    | 0       | 0.21929  | 8.47714  | 31.71153 | 65.16332 | 117.0395 | 1    | 1 | 0.5 | 2 | 1824.33 | 1.26478 | 0.05509 | 0 | 0.7  |
| YGR205W | <i>ygr205wΔ</i> | 0       | 0.00666  | 0.8663   | 7.36374  | 17.10402 | 106.3031 | 1    | 1 | 0.5 | 5 | 1573.08 | 1.7603  | 0.05903 | 0 | 0.7  |
| YGR208W | <i>ser2Δ</i>    | 0       | 1.75498  | 6.11975  | 25.68164 | 37.9076  | 82.63912 | 1    | 1 | 0.5 | 2 | 1337.33 | 0.59337 | 0.1011  | 0 | 0    |
| YGR233C | <i>pho81Δ</i>   | 0       | 4.25612  | 5.42083  | 20.87729 | 40.86946 | 93.97072 | 1    | 1 | 0.5 | 5 | 1347.6  | 0.8433  | 0.10033 | 0 | 0    |
| YGR261C | <i>apl6Δ</i>    | 0.20269 | 2.35122  | 14.16771 | 36.35752 | 65.216   | 76.29837 | 0.25 | 1 | 1   | 5 | 1365.89 | 0.87666 | 0.09301 | 0 | 0    |
| YGR262C | <i>bud32Δ</i>   | 0       | 0.12368  | 11.23758 | 53.25758 | 70.71474 | 41.36572 | 0    | 0 | 0.5 | 1 | 3021.92 | 1.55562 | 0.12713 | 0 | 0    |
| YHL007C | <i>ste20Δ</i>   | 0       | 0.01552  | 1.0235   | 6.42775  | 11.48268 | 42.4528  | 1    | 1 | 0.5 | 1 | 1369.5  | 1.06132 | 0.08531 | 0 | 0    |
| YHR025W | <i>thr1Δ</i>    | 0       | 0.0944   | 2.99402  | 5.22854  | 7.50846  | 155.4422 | 1    | 1 | 0.5 | 2 | 1772    | 2.41019 | 0.11575 | 0 | 0    |
| YHR043C | <i>dog2Δ</i>    | 0       | 0        | 0        | 0.62707  | 4.49919  | 58.07732 | 1    | 1 | 0.5 | 4 | 1409.38 | 1.56363 | 0.08507 | 0 | 0    |
| YHR044C | <i>dog1Δ</i>    | 0       | 0.00327  | 1.27681  | 3.41012  | 10.52335 | 117.6696 | 1    | 1 | 0.5 | 4 | 1629.31 | 1.97053 | 0.08768 | 0 | 0    |
| YHR075C | <i>ppe1Δ</i>    | 0       | 0        | 0.04001  | 2.16967  | 5.22023  | 15.08763 | 0.5  | 1 | 0.5 | 5 | 1351.61 | 1.64769 | 0.06077 | 0 | 0.7  |
| YHR076W | <i>ptc7Δ</i>    | 0       | 0.04998  | 3.2018   | 16.33657 | 32.23385 | 35.41548 | 1    | 1 | 0.5 | 3 | 1432.86 | 0.86302 | 0.09365 | 0 | 0    |
| YHR079C | <i>ire1Δ</i>    | 0.00826 | 6.15114  | 28.26689 | 49.18228 | 59.29622 | 86.3316  | 1    | 1 | 0.5 | 1 | 1307.5  | 0.90979 | 0.11121 | 0 | 0    |
| YHR082C | <i>ksp1Δ</i>    | 0       | 0.02065  | 1.47404  | 4.33017  | 15.4027  | 78.00101 | 1    | 1 | 0.5 | 1 | 1332.56 | 2.14778 | 0.11333 | 0 | 0    |
| YHR135C | <i>yck1Δ</i>    | 0       | 0.60811  | 15.20073 | 50.80112 | 72.84594 | 144.9947 | 1    | 1 | 0.5 | 1 | 2319    | 1.06926 | 0.06644 | 0 | 0    |
| YHR136C | <i>spl2Δ</i>    | 0       | 0        | 2.06654  | 17.02924 | 36.76808 | 90.71198 | 1    | 1 | 0.5 | 5 | 1386.8  | 1.06002 | 0.08682 | 0 | 0    |
| YIL002C | <i>inp51Δ</i>   | 0.04033 | 3.34929  | 20.88782 | 41.06488 | 42.11841 | 100.1817 | 1    | 1 | 0.5 | 4 | 1199.46 | 0.90468 | 0.1442  | 0 | 0    |
| YIL035C | <i>cka1Δ</i>    | 0       | 0        | 0.31913  | 1.39864  | 5.94185  | 82.35461 | 1    | 1 | 0.5 | 1 | 1476.94 | 1.09737 | 0.13783 | 0 | 0    |
| YIL053W | <i>rhr2Δ</i>    | 0       | 0.04202  | 0.98585  | 4.48277  | 9.03691  | 94.62479 | 1    | 1 | 0   | 4 | 1435.44 | 1.33356 | 0.07962 | 0 | 0    |
| YIL057C | <i>iks1Δ</i>    | 0.01429 | 0.62215  | 3.18876  | 7.61319  | 15.39449 | 42.40246 | 1    | 1 | 0.5 | 5 | 1250.9  | 0.37128 | 0.08932 | 0 | -0.7 |
| YIL095W | <i>prk1Δ</i>    | 0       | 0.07107  | 3.55179  | 16.69772 | 29.65558 | 79.21983 | 1    | 1 | 0.5 | 1 | 1386.71 | 0.68656 | 0.10559 | 0 | 0    |
| YIL113W | <i>sdp1Δ</i>    | 0.52376 | 8.0961   | 49.59379 | 62.25722 | 131.9926 | 134.2119 | 1    | 1 | 0.5 | 3 | 1338.93 | 1.77247 | 0.14899 | 0 | 0.9  |
| YIL153W | <i>rrd1Δ</i>    | 0.09253 | 15.48775 | 35.69198 | 66.87801 | 82.31418 | 136.288  | 1    | 1 | 0.5 | 5 | 1813.74 | 0.72018 | 0.10605 | 0 | 0    |
| YIR026C | <i>yvh1Δ</i>    | 0       | 3.57478  | 20.85593 | 53.09647 | 80.87995 | 112.6106 | 1    | 0 | 0.5 | 3 | 2004.38 | 1.56997 | 0.07382 | 0 | 0    |
| YJL024C | <i>aps3Δ</i>    | 0.00817 | 4.32798  | 25.11823 | 53.19483 | 62.81867 | 112.9879 | 1    | 1 | 1   | 5 | 1221.61 | 1.35806 | 0.08311 | 0 | 0    |
| YJL095W | <i>bck1Δ</i>    | 0       | 0.97782  | 18.95834 | 38.34262 | 56.16422 | 101.9007 | 1    | 1 | 0.5 | 1 | 1616.5  | 0.67505 | 0.08837 | 0 | 0    |
| YJL098W | <i>sap185Δ</i>  | 0       | 0.57206  | 5.293    | 19.9262  | 37.45001 | 62.85636 | 1    | 1 | 0.5 | 3 | 1188.21 | 0.58789 | 0.10735 | 0 | 0    |
| YJL100W | <i>lsb6Δ</i>    | 0       | 0.01137  | 1.94005  | 20.79145 | 27.52721 | 139.9    | 1    | 1 | 0.5 | 2 | 1493.2  | 1.56612 | 0.09704 | 0 | 0    |
| YJL106W | <i>ime2Δ</i>    | 0       | 0.22527  | 6.2855   | 17.78602 | 30.13812 | 62.74678 | 1    | 1 | 0.5 | 1 | 1345.85 | 0.77906 | 0.08871 | 0 | 0    |
| YJL128C | <i>pbs2Δ</i>    | 0       | 0.12047  | 9.7323   | 22.86031 | 50.24116 | 79.7865  | 1    | 1 | 0.5 | 1 | 1633.73 | 1.47466 | 0.04872 | 0 | 0.7  |
| YJL134W | <i>lcb3Δ</i>    | 0.00109 | 1.26018  | 14.20652 | 32.02213 | 35.23687 | 89.67278 | 1    | 1 | 0.5 | 4 | 1261.96 | 0.99428 | 0.11361 | 0 | 0    |
| YJL141C | <i>yak1Δ</i>    | 0       | 0.46591  | 15.89606 | 42.729   | 84.63369 | 185.7743 | 1    | 1 | 0.5 | 1 | 2277.61 | 2.05422 | 0.03562 | 0 | 0.7  |
| YJL164C | <i>tpk1Δ</i>    | 0       | 0.17321  | 8.78547  | 22.01651 | 43.06363 | 111.9741 | 1    | 1 | 0.5 | 1 | 1378.25 | 1.05201 | 0.09958 | 0 | 0    |
| YJL165C | <i>hal5Δ</i>    | 0       | 1.18629  | 18.11975 | 27.23138 | 53.26168 | 129.6155 | 1    | 1 | 0.5 | 1 | 1380.13 | 0.90724 | 0.10721 | 0 | 0    |
| YJR049C | <i>utr1Δ</i>    | 0       | 0.37426  | 7.35225  | 23.2596  | 40.9516  | 61.78722 | 1    | 1 | 1   | 2 | 1558.79 | 0.32886 | 0.07594 | 0 | 0    |
| YJR059W | <i>ptk2Δ</i>    | 0       | 3.79327  | 19.22837 | 34.81374 | 54.95159 | 110.1868 | 0.25 | 1 | 0   | 1 | 1354.31 | 0.923   | 0.10887 | 0 | 0    |
| YJR066W | <i>tor1Δ</i>    | 0       | 0        | 0.12328  | 2.58361  | 9.82595  | 64.35702 | 1    | 1 | 1   | 1 | 1434.6  | 0.53698 | 0.07895 | 0 | 0    |
| YJR105W | <i>ado1Δ</i>    | 0       | 1.59464  | 13.25099 | 29.19253 | 44.97065 | 75.53799 | 1    | 1 | 1   | 2 | 1445.91 | 0.90946 | 0.08998 | 0 | 0    |
| YJR110W | <i>ymr1Δ</i>    | 0.00399 | 7.00958  | 30.60435 | 52.13252 | 62.33275 | 116.4913 | 1    | 1 | 0.5 | 4 | 1272.58 | 1.25095 | 0.13551 | 0 | 0    |
| YKL001C | <i>mef14Δ</i>   | 0.00405 | 5.72061  | 26.74866 | 35.0331  | 54.08896 | 86.98139 | 1    | 1 | 0.5 | 2 | 1427.88 | 1.19842 | 0.09147 | 0 | 0    |
| YKL048C | <i>elm1Δ</i>    | 0       | 0        | 0.30065  | 17.03632 | 38.93213 | 226.256  | 1    | 1 | 0.5 | 1 | 2147.67 | 1.53251 | 0.10476 | 0 | 0.9  |

|         |                 |         |          |          |          |          |          |      |   |     |   |         |         |         |   |      |
|---------|-----------------|---------|----------|----------|----------|----------|----------|------|---|-----|---|---------|---------|---------|---|------|
| YKL051W | <i>sfk1Δ</i>    | 0       | 0.11769  | 5.00734  | 15.39252 | 33.75209 | 98.84608 | 1    | 1 | 0.5 | 5 | 1564.3  | 1.34895 | 0.08643 | 0 | 0    |
| YKL067W | <i>ynk1Δ</i>    | 0       | 0        | 0.8466   | 2.92861  | 13.78375 | 91.58671 | 0.5  | 1 | 0.5 | 2 | 1504.89 | 1.6512  | 0.11493 | 0 | 0    |
| YKL101W | <i>hsl1Δ</i>    | 0       | 0.11655  | 4.97995  | 22.91315 | 44.93844 | 115.4179 | 1    | 1 | 0.5 | 1 | 1426    | 2.2765  | 0.06118 | 0 | 0.7  |
| YKL116C | <i>prr1Δ</i>    | 0       | 5.47351  | 34.06747 | 65.76876 | 71.67616 | 125.1679 | 1    | 1 | 0.5 | 1 | 1354.2  | 1.25757 | 0.11906 | 0 | 0    |
| YKL126W | <i>ypk1Δ</i>    | 0       | 1.45488  | 103.7947 | 53.92556 | 62.67735 | 166.5162 | 1    | 1 | 0.5 | 1 | 1459.6  | 1.57261 | 0.13702 | 1 | 0    |
| YKL139W | <i>ctk1Δ</i>    | 0       | 0        | 0        | 0        | 0        | 0        | 0    | 0 | 0.5 | 1 | 2500    | -       | -       | 0 | -1   |
| YKL161C | <i>mlp1Δ</i>    | 0       | 0.45261  | 6.7847   | 20.44085 | 42.74168 | 78.00645 | 1    | 1 | 0.5 | 1 | 1431.31 | 0.67866 | 0.09304 | 0 | 0    |
| YKL166C | <i>tpk3Δ</i>    | 0       | 0.06059  | 7.97928  | 21.99647 | 52.25007 | 52.25007 | 1    | 1 | 0.5 | 1 | 1325.87 | 1.34959 | 0.11159 | 0 | 0    |
| YKL168C | <i>kkq8Δ</i>    | 0.00446 | 0.91067  | 11.29307 | 30.65076 | 37.18591 | 105.3383 | 1    | 1 | 0.5 | 1 | 1414.47 | 0.57243 | 0.09559 | 0 | 0    |
| YKL171W | <i>ykl171wΔ</i> | 0       | 2.54503  | 25.01642 | 37.46652 | 35.27052 | 69.3518  | 1    | 1 | 0.5 | 1 | 1610.45 | 0.22557 | 0.10233 | 0 | -0.7 |
| YKL198C | <i>ptk1Δ</i>    | 0.05604 | 0.43532  | 12.21602 | 28.26323 | 47.03459 | 139.2791 | 1    | 1 | 0.5 | 1 | 1404.89 | 1.13146 | 0.12747 | 0 | 0    |
| YKL212W | <i>sac1Δ</i>    | 0       | 0.26022  | 13.08162 | 25.07644 | 55.10967 | 94.84602 | 0    | 1 | 0.5 | 4 | 1359.33 | 0.35685 | 0.14601 | 0 | -0.7 |
| YKRO28W | <i>sap190Δ</i>  | 0.01241 | 1.54957  | 9.32872  | 17.16022 | 33.34771 | 66.00767 | 1    | 1 | 0.5 | 3 | 1231    | 0.87342 | 0.12351 | 0 | 0    |
| YKRO53C | <i>psr3Δ</i>    | 0       | 0.11008  | 4.83547  | 15.78362 | 36.2863  | 80.75711 | 1    | 1 | 0.5 | 4 | 1304.25 | 0.89168 | 0.11227 | 0 | 0    |
| YLL010C | <i>psr1Δ</i>    | 0       | 1.27591  | 6.711    | 24.64838 | 26.48991 | 47.23173 | 1    | 1 | 0.5 | 3 | 1421.2  | 0.74343 | 0.08544 | 0 | 0    |
| YLL019C | <i>kns1Δ</i>    | 0       | 0.53405  | 4.29485  | 9.80079  | 11.03078 | 53.87569 | 0.25 | 1 | 0.5 | 1 | 1086.38 | 1.65713 | 0.11788 | 0 | 0    |
| YLR006C | <i>ssk1Δ</i>    | 0       | 0.32396  | 12.66077 | 28.69864 | 52.1032  | 179.3541 | 0    | 1 | 0.5 | 5 | 2064.73 | 2.62065 | 0.04127 | 0 | 0.7  |
| YLR019W | <i>psr2Δ</i>    | 0       | 2.09279  | 14.58251 | 22.9586  | 42.49158 | 55.91682 | 1    | 1 | 0.5 | 3 | 2201.46 | 0.8294  | 0.06698 | 0 | 0    |
| YLR079W | <i>sic1Δ</i>    | 0       | 0        | 0.02985  | 0.63262  | 0.65601  | 24.29885 | 1    | 1 | 0.5 | 5 | 1488.86 | 0.26546 | 0.16551 | 0 | -0.7 |
| YLR096W | <i>kin2Δ</i>    | 0       | 0.01751  | 1.04717  | 12.91275 | 30.72382 | 109.0163 | 1    | 1 | 0.5 | 1 | 1401.79 | 0.87447 | 0.11174 | 0 | 0    |
| YLR113W | <i>hog1Δ</i>    | 0.0028  | 0.12206  | 7.79798  | 17.23243 | 38.61021 | 73.80482 | 1    | 1 | 0.5 | 1 | 1437.75 | 1.14508 | 0.08339 | 0 | 0    |
| YLR133W | <i>cki1Δ</i>    | 0.08935 | 3.6226   | 17.46179 | 42.85956 | 59.6994  | 81.29479 | 1    | 1 | 0.5 | 2 | 1114.4  | 0.7262  | 0.1401  | 0 | 0    |
| YLR240W | <i>vps34Δ</i>   | 0       | 0        | 0.15794  | 1.43173  | 4.1505   | 0        | 0    | 0 | 0.5 | 2 | 1770.43 | -       | -       | 0 | -1   |
| YLR248W | <i>rck2Δ</i>    | 0.19585 | 2.643    | 17.08265 | 30.24055 | 52.13057 | 100.4274 | 1    | 1 | 0.5 | 1 | 1257.92 | 0.81203 | 0.15129 | 0 | 0    |
| YLR260W | <i>lcb5Δ</i>    | 0       | 0        | 0        | 0        | 0        | 0        | 0    | 0 | 0   | 2 | 1164.32 | -       | -       | 0 | -1   |
| YML016C | <i>ppz1Δ</i>    | 0.00401 | 0.41636  | 4.30438  | 22.34545 | 36.52833 | 58.42091 | 1    | 1 | 0.5 | 3 | 1326.47 | 0.537   | 0.10116 | 0 | 0    |
| YML061C | <i>pif1Δ</i>    | 0       | 0        | 0        | 0        | 0        | 0        | 0    | 1 | 0   | 5 | 1247.2  | -       | -       | 0 | -1   |
| YML070W | <i>dak1Δ</i>    | 0       | 0.06726  | 5.87802  | 19.23292 | 28.34192 | 55.16822 | 1    | 1 | 0.5 | 2 | 1384.03 | 0.81283 | 0.09179 | 0 | 0    |
| YML100W | <i>tsl1Δ</i>    | 0.2541  | 8.64158  | 30.91642 | 49.32368 | 80.44223 | 114.0606 | 1    | 1 | 0.5 | 5 | 1395.43 | 0.90886 | 0.09506 | 0 | 0    |
| YML112W | <i>ctk3Δ</i>    | 0       | 1.82441  | 26.33565 | 54.00763 | 72.77421 | 150.7141 | 0    | 1 | 0.5 | 1 | 2144.5  | 0.73238 | 0.1004  | 0 | -0.7 |
| YMR036C | <i>mih1Δ</i>    | 0       | 0.10874  | 5.11392  | 24.5661  | 32.40078 | 70.04744 | 1    | 1 | 0.5 | 3 | 1442.58 | 0.39804 | 0.07569 | 0 | -0.9 |
| YMR104C | <i>ypk2Δ</i>    | 0.1677  | 3.63816  | 14.4034  | 38.43179 | 55.4472  | 104.0941 | 1    | 1 | 0.5 | 1 | 1692.76 | 0.65438 | 0.10007 | 0 | 0    |
| YMR156C | <i>tpp1Δ</i>    | 0       | 0.01566  | 1.6424   | 15.79458 | 34.79471 | 92.64099 | 1    | 1 | 0.5 | 4 | 1434.69 | 0.8366  | 0.08357 | 0 | 0    |
| YMR199W | <i>cln1Δ</i>    | 0       | 2.56352  | 14.89531 | 38.12671 | 61.45677 | 117.5162 | 1    | 1 | 0.5 | 5 | 1283.55 | 1.27924 | 0.12124 | 0 | 0    |
| YMR261C | <i>tps3Δ</i>    | 0       | 7.78253  | 21.91258 | 37.55289 | 46.00497 | 82.80862 | 0.5  | 1 | 0.5 | 5 | 1361.04 | 1.18355 | 0.10571 | 0 | 0    |
| YMR291W | <i>ymr291wΔ</i> | 0.05227 | 7.37987  | 20.78312 | 46.67208 | 56.25332 | 99.90464 | 1    | 1 | 0.5 | 1 | 1231.37 | 0.8171  | 0.10773 | 0 | 0    |
| YMR311C | <i>glc8Δ</i>    | 0.1161  | 13.40246 | 42.06056 | 71.20211 | 105.4275 | 118.0529 | 1    | 1 | 0   | 5 | 1609.94 | 0.65225 | 0.12866 | 0 | 0    |
| YNL020C | <i>ark1Δ</i>    | 0       | 0.01477  | 5.62691  | 12.42363 | 43.40255 | 115.586  | 1    | 1 | 0.5 | 1 | 1755.5  | 4.37525 | 0.04737 | 0 | 0.7  |
| YNL032W | <i>siw14Δ</i>   | 0       | 0.86668  | 6.54201  | 23.79363 | 31.6927  | 75.68764 | 1    | 1 | 0.5 | 3 | 1407.9  | 0.99786 | 0.09929 | 0 | 0    |
| YNL053W | <i>msg5Δ</i>    | 0.11391 | 6.93858  | 28.54865 | 62.27455 | 83.20161 | 119.7138 | 1    | 1 | 0.5 | 3 | 1416.62 | 1.06039 | 0.07707 | 0 | 0    |
| YNL106C | <i>inp52Δ</i>   | 0.00756 | 1.84129  | 16.61858 | 36.80676 | 53.43281 | 112.0532 | 1    | 1 | 0.5 | 4 | 1510.73 | 0.94961 | 0.08814 | 0 | 0    |
| YNL128W | <i>tep1Δ</i>    | 0       | 1.77613  | 8.02605  | 11.34429 | 22.68924 | 55.46047 | 1    | 1 | 0.5 | 4 | 1369.5  | 0.93811 | 0.07227 | 0 | 0    |
| YNL183C | <i>npr1Δ</i>    | 0.33492 | 9.72862  | 28.47552 | 38.29196 | 50.59946 | 110.4431 | 1    | 1 | 1   | 1 | 1791.25 | 0.8089  | 0.1051  | 0 | 0    |
| YNL289W | <i>pcl1Δ</i>    | 0.00155 | 0.01253  | 1.65156  | 17.90562 | 24.8061  | 66.31684 | 1    | 1 | 0.5 | 5 | 1489.99 | 0.56173 | 0.07294 | 0 | 0    |
| YNL298W | <i>cla4Δ</i>    | 0.01206 | 8.63764  | 25.6021  | 38.84082 | 65.40908 | 124.6937 | 0.5  | 1 | 0.5 | 1 | 1384.75 | 0.88652 | 0.10574 | 0 | 0    |
| YNL307C | <i>mck1Δ</i>    | 0       | 0.66262  | 9.12687  | 22.70536 | 33.01088 | 49.69225 | 1    | 1 | 0.5 | 1 | 1090.06 | 0.3354  | 0.12403 | 0 | -0.7 |
| YNR012W | <i>urk1Δ</i>    | 0       | 0.02017  | 2.49272  | 8.20429  | 14.51757 | 106.8194 | 1    | 1 | 0.5 | 2 | 1396.71 | 1.41788 | 0.10447 | 0 | 0    |
| YNR031C | <i>ssk2Δ</i>    | 0.03988 | 3.62926  | 20.10476 | 28.81352 | 54.21097 | 85.65498 | 1    | 1 | 0.5 | 1 | 1249.82 | 1.27971 | 0.10695 | 0 | 0    |

|         |                 |         |          |          |          |          |          |      |   |     |   |         |          |         |   |      |
|---------|-----------------|---------|----------|----------|----------|----------|----------|------|---|-----|---|---------|----------|---------|---|------|
| YNR032W | <i>ppg1Δ</i>    | 0.31864 | 9.8773   | 33.73514 | 54.28669 | 62.81    | 98.12057 | 1    | 1 | 0   | 3 | 1159.39 | 0.90855  | 0.15622 | 0 | 0    |
| YNR047W | <i>ynr047wΔ</i> | 0       | 0.2604   | 6.94222  | 21.89685 | 42.28314 | 112.8164 | 1    | 1 | 0.5 | 1 | 1530.83 | 1.10589  | 0.08332 | 0 | 0    |
| YOL001W | <i>pho80Δ</i>   | 0       | 0        | 0        | 0.0382   | 0.57388  | 5.04961  | 0    | 1 | 0.5 | 5 | 2268.78 | 0.10354  | 0.06746 | 0 | -0.9 |
| YOL016C | <i>cmk2Δ</i>    | 0.00757 | 5.48154  | 29.35296 | 50.01814 | 77.5687  | 87.94358 | 1    | 1 | 0.5 | 1 | 1366.41 | 1.64391  | 0.08775 | 0 | 0    |
| YOL045W | <i>psk2Δ</i>    | 0.08983 | 4.24369  | 34.41854 | 66.79882 | 73.61404 | 108.0131 | 1    | 1 | 1   | 1 | 1377.33 | 1.38257  | 0.11113 | 0 | 0    |
| YOL055C | <i>thi20Δ</i>   | 0       | 0.50863  | 7.65535  | 20.01719 | 32.05091 | 71.86559 | 1    | 1 | 0.5 | 2 | 1144.75 | 1.02346  | 0.11276 | 0 | 0    |
| YOL065C | <i>inp54Δ</i>   | 0       | 0.7364   | 4.97247  | 18.51246 | 37.64996 | 73.47975 | 1    | 1 | 0.5 | 4 | 1280.52 | 0.76077  | 0.11316 | 0 | 0    |
| YOL100W | <i>pkh2Δ</i>    | 0.23994 | 6.48057  | 32.52713 | 48.11173 | 72.38037 | 127.2481 | 1    | 1 | 0.5 | 1 | 1330.54 | 1.34944  | 0.10392 | 0 | 0    |
| YOL113W | <i>skm1Δ</i>    | 0       | 0.00863  | 0.28706  | 0.92108  | 0.85195  | 0.64038  | 0    | 0 | 0.5 | 1 | 1563.6  | 0.01485  | 0.05873 | 0 | -0.9 |
| YOL128C | <i>ygk3Δ</i>    | 0.00605 | 0        | 0.0157   | 0.19973  | 0.05131  | 22.24629 | 1    | 1 | 0.5 | 1 | 1359.12 | 0.94234  | 0.08672 | 0 | 0    |
| YOL136C | <i>pfk27Δ</i>   | 0       | 0.13824  | 5.90477  | 19.77866 | 41.32336 | 119.3397 | 1    | 1 | 0.5 | 2 | 1517.85 | 0.92158  | 0.07832 | 0 | 0    |
| YOL138C | <i>yol138cΔ</i> | 0.00143 | 3.74251  | 18.19244 | 44.09001 | 68.79109 | 106.6593 | 1    | 1 | 1   | 5 | 1380.36 | 0.99109  | 0.11089 | 0 | 0    |
| YOR014W | <i>rts1Δ</i>    | 0.00224 | 0.37947  | 8.88878  | 15.5552  | 29.92597 | 92.53147 | 0.25 | 1 | 1   | 3 | 1783    | 0.70416  | 0.09014 | 0 | 0    |
| YOR039W | <i>ckb2Δ</i>    | 0       | 0.03672  | 4.5824   | 13.94076 | 21.04778 | 115.2255 | 0.5  | 1 | 0.5 | 5 | 1238.2  | 0.87214  | 0.14298 | 0 | 0    |
| YOR054C | <i>vhs3Δ</i>    | 0       | 0.37287  | 2.89188  | 4.79746  | 13.38117 | 31.58546 | 0.5  | 1 | 0.5 | 5 | 1375.3  | 1.59951  | 0.06195 | 0 | 0.7  |
| YOR061W | <i>cka2Δ</i>    | 0       | 4.6971   | 23.28545 | 35.14676 | 55.77914 | 133.0061 | 0.5  | 1 | 0.5 | 1 | 1363.31 | 0.82468  | 0.12874 | 0 | 0    |
| YOR090C | <i>ptc5Δ</i>    | 0       | 0.2719   | 5.2262   | 12.18667 | 32.20248 | 80.83066 | 1    | 1 | 0.5 | 3 | 1439.3  | 2.21377  | 0.06097 | 0 | 0    |
| YOR109W | <i>inp53Δ</i>   | 0.00115 | 0.41789  | 8.55709  | 32.48044 | 45.84504 | 155.1258 | 0.5  | 1 | 0.5 | 4 | 1407.72 | 1.60281  | 0.11707 | 0 | 0    |
| YOR171C | <i>lcb4Δ</i>    | 0.06644 | 0.46852  | 8.90913  | 15.09912 | 26.472   | 69.94974 | 1    | 1 | 0.5 | 2 | 1377.38 | 0.35297  | 0.08223 | 0 | -0.7 |
| YOR178C | <i>gac1Δ</i>    | 0       | 1.8238   | 19.38599 | 45.52173 | 63.78567 | 99.16843 | 1    | 1 | 0   | 5 | 1450.12 | 1.16812  | 0.06579 | 0 | 0    |
| YOR208W | <i>ptp2Δ</i>    | 0.02131 | 0.2041   | 9.22887  | 20.19932 | 36.25784 | 102.3001 | 1    | 1 | 0.5 | 3 | 1243    | 0.73408  | 0.12765 | 0 | 0    |
| YOR231W | <i>mkk1Δ</i>    | 0.00811 | 2.9967   | 25.23435 | 64.49107 | 109.9058 | 144.1912 | 1    | 1 | 0.5 | 3 | 1911.08 | 1.93839  | 0.0622  | 0 | 0    |
| YOR233W | <i>kin4Δ</i>    | 0       | 0.08459  | 5.48306  | 25.82337 | 38.80485 | 44.27483 | 1    | 1 | 0.5 | 1 | 1428.4  | 0.64768  | 0.1043  | 0 | -0.7 |
| YOR267C | <i>hrk1Δ</i>    | 0       | 0.00677  | 0.88638  | 4.05456  | 10.26523 | 99.30305 | 1    | 1 | 0.5 | 1 | 1488.77 | 1.70222  | 0.10761 | 0 | 0    |
| YOR347C | <i>pyk2Δ</i>    | 0.02181 | 0.21389  | 12.06925 | 15.53384 | 42.29677 | 109.7734 | 1    | 1 | 0.5 | 2 | 1430.21 | 0.65245  | 0.11844 | 0 | 0    |
| YOR351C | <i>mek1Δ</i>    | 0       | 0.30344  | 8.74161  | 27.91592 | 40.21668 | 87.76678 | 1    | 1 | 0.5 | 1 | 1289.93 | 0.87117  | 0.09295 | 0 | 0    |
| YPL004C | <i>lsp1Δ</i>    | 0.07748 | 9.60517  | 21.85186 | 42.54923 | 43.48322 | 80.7638  | 1    | 1 | 0.5 | 1 | 1340.9  | 1.23005  | 0.0898  | 0 | 0    |
| YPL026C | <i>skt1Δ</i>    | 0.04917 | 9.2177   | 39.66546 | 54.80207 | 72.88942 | 124.2539 | 1    | 1 | 0.5 | 1 | 1252.35 | 1.08202  | 0.12548 | 0 | 0    |
| YPL031C | <i>pho85Δ</i>   | 6.45371 | 45.05827 | 70.71639 | 158.7525 | 171.612  | 364.4521 | 0.25 | 1 | 1   | 1 | 2204.57 | 11.83544 | 0.05763 | 0 | 1    |
| YPL042C | <i>ssn3Δ</i>    | 0       | 0        | 0.0207   | 0        | 9.30718  | 2.15901  | 0.5  | 1 | 0.5 | 1 | 1603.33 | 0.07138  | 0.10151 | 0 | -0.9 |
| YPL049C | <i>dig1Δ</i>    | 0       | 0.41     | 8.04446  | 20.3124  | 49.73418 | 158.6979 | 1    | 1 | 0.5 | 5 | 1680.25 | 1.25683  | 0.08168 | 0 | 0    |
| YPL084W | <i>bro1Δ</i>    | 0       | 0        | 0.01476  | 1.01719  | 1.05873  | 0.00715  | 0.25 | 1 | 0   | 5 | 1376.96 | 0.5518   | 0.12746 | 0 | -0.7 |
| YPL140C | <i>mkk2Δ</i>    | 0       | 0.18694  | 5.39833  | 24.5696  | 48.9055  | 90.55699 | 1    | 1 | 0.5 | 1 | 1634.88 | 0.68221  | 0.06522 | 0 | 0    |
| YPL141C | <i>ypl141cΔ</i> | 0.15529 | 2.86994  | 16.04266 | 39.78473 | 60.96911 | 95.38066 | 1    | 1 | 0.5 | 1 | 1398.22 | 0.60096  | 0.11823 | 0 | 0    |
| YPL150W | <i>ypl150wΔ</i> | 0       | 0        | 0        | 0.58477  | 1.29791  | 64.59156 | 1    | 1 | 1   | 1 | 1518    | 1.63086  | 0.08134 | 0 | 0    |
| YPL179W | <i>ppq1Δ</i>    | 0       | 10.48225 | 38.60434 | 82.91281 | 97.47525 | 151.5264 | 1    | 1 | 0.5 | 3 | 1943.53 | 1.52925  | 0.05408 | 0 | 0    |
| YPL188W | <i>pos5Δ</i>    | 0       | 6.3244   | 9.83722  | 18.0516  | 49.05975 | 100.5077 | 0    | 1 | 0.5 | 2 | 1381.88 | 2.22778  | 0.08381 | 0 | 0.7  |
| YPL195W | <i>apl5Δ</i>    | 0       | 0.09196  | 3.74824  | 19.28866 | 34.04364 | 78.19652 | 0.5  | 1 | 0.5 | 5 | 1260.19 | 0.69486  | 0.0919  | 0 | 0    |
| YPL203W | <i>tpk2Δ</i>    | 0       | 0.86649  | 7.5903   | 23.22188 | 38.19848 | 98.32279 | 1    | 1 | 0.5 | 1 | 1409.91 | 1.49997  | 0.06224 | 0 | 0.7  |
| YPL219W | <i>pcl8Δ</i>    | 0.00334 | 0.34587  | 17.1977  | 43.30777 | 54.79329 | 84.16493 | 1    | 1 | 0.5 | 5 | 1228.77 | 0.86393  | 0.11252 | 0 | 0    |
| YPL236C | <i>ypl236cΔ</i> | 0       | 0        | 0.0301   | 1.29514  | 0.50263  | 0.39979  | 0    | 0 | 0.5 | 1 | 1790.25 | -        | -       | 0 | -1   |
| YPL258C | <i>thi21Δ</i>   | 0       | 0        | 2.5422   | 4.89678  | 5.50261  | 89.06182 | 1    | 1 | 0.5 | 2 | 1366.4  | 1.82109  | 0.09223 | 0 | 0    |
| YPRO54W | <i>smk1Δ</i>    | 0       | 0.44741  | 16.81158 | 32.07738 | 50.81846 | 136.7679 | 1    | 1 | 0.5 | 1 | 1696.25 | 0.83424  | 0.12541 | 0 | 0    |
| YPRO73C | <i>ltp1Δ</i>    | 0       | 0.2549   | 8.72395  | 36.5221  | 46.76633 | 94.85443 | 1    | 1 | 0.5 | 3 | 1391.79 | 0.87919  | 0.08651 | 0 | 0    |
| YPR111W | <i>dbf20Δ</i>   | 0       | 0.00805  | 4.15454  | 18.51838 | 27.75628 | 108.6332 | 1    | 1 | 0.5 | 1 | 1269.8  | 1.26365  | 0.12496 | 0 | 0    |
| YPR121W | <i>thi22Δ</i>   | 0.07801 | 13.08713 | 39.62687 | 73.534   | 85.02086 | 150.9539 | 1    | 1 | 0.5 | 2 | 1664.28 | 1.5253   | 0.09933 | 0 | 0    |

Numerical values of columns 1–15 were used for hierarchical clustering (Fig. 3). Column descriptors are the following: (1–6) total peroxisome induction at 0, 2, 4, 6, 8, and 20 h of incubation in YPBO reported as the ratio of the mean Pot1p-GFP signal (in pixels) to the mean

area of a cell of a particular strain (in pixels); (7) growth on YPBM plates (1, normal growth; 0.5, impaired; 0.25, severely impaired; 0, no colonies formed); (8) growth on YPD plates (1, normal growth; 0, impaired); (9) Storage carbohydrate levels (1, increased; 0.5, normal; 0, reduced; information was obtained from the Saccharomyces Genome Database [<http://www.yeastgenome.org/>]); (10) molecular gene function (1, protein kinase; 2, other kinase; 3, protein phosphatase; 4, other phosphatase; 5, other; Information was obtained from the Saccharomyces Genome Database); (11) mean cell area (in pixels); (12) mean peroxisome volume (in micrometers cubed); (13) mean number of peroxisomes per cell area (in micrometers squared); (14) uncoupling of peroxisome biogenesis from the environment, i.e. induction not progressively increasing in YPBO or significant induction in glucose (0, no uncoupling; 1, uncoupling); (15) peroxisome morphology (1, large irregular peroxisomes with loss of function; 0.9, large peroxisomes; 0.7, peroxisome clustering; 0, normal peroxisome morphology; -0.7, numerous small peroxisomes; -0.9, few small peroxisomes; -1, no peroxisomes).

Table S3. *S. cerevisiae* strains used in this study

| Strain           | Genotype                                                                                                                                 | Derivation            |
|------------------|------------------------------------------------------------------------------------------------------------------------------------------|-----------------------|
| BY4741           | MAT $\alpha$ , his3 $\Delta$ 1, leu2 $\Delta$ 0, met15 $\Delta$ 0, ura3 $\Delta$ 0                                                       | Giaever et al. (2002) |
| BY4742           | MAT $\alpha$ , his3 $\Delta$ 1, leu2 $\Delta$ 0, lys2 $\Delta$ 0, ura3 $\Delta$ 0                                                        | Giaever et al. (2002) |
| BY4743           | MAT $\alpha$ / $\alpha$ , his3 $\Delta$ 1/his3 $\Delta$ 1, leu2 $\Delta$ 0/leu2 $\Delta$ 0, lys2 $\Delta$ 0/LYS2, MET15/met15 $\Delta$ 0 | Giaever et al. (2002) |
| tpd3 $\Delta$    | MAT $\alpha$ , leu2 $\Delta$ 0, lys2 $\Delta$ 0, ura3 $\Delta$ 0, tpd3::KanMX4                                                           | Giaever et al. (2002) |
| psk1 $\Delta$    | MAT $\alpha$ , leu2 $\Delta$ 0, lys2 $\Delta$ 0, ura3 $\Delta$ 0, psk1::KanMX4                                                           | Giaever et al. (2002) |
| cln3 $\Delta$    | MAT $\alpha$ , leu2 $\Delta$ 0, lys2 $\Delta$ 0, ura3 $\Delta$ 0, cln3::KanMX4                                                           | Giaever et al. (2002) |
| kin3 $\Delta$    | MAT $\alpha$ , leu2 $\Delta$ 0, lys2 $\Delta$ 0, ura3 $\Delta$ 0, kin3::KanMX4                                                           | Giaever et al. (2002) |
| fus3 $\Delta$    | MAT $\alpha$ , his3 $\Delta$ 1, leu2 $\Delta$ 0, lys2 $\Delta$ 0, ura3 $\Delta$ 0, fus3::KanMX4                                          | Giaever et al. (2002) |
| ptc3 $\Delta$    | MAT $\alpha$ , his3 $\Delta$ 1, leu2 $\Delta$ 0, lys2 $\Delta$ 0, ura3 $\Delta$ 0, ptc3::KanMX4                                          | Giaever et al. (2002) |
| tel1 $\Delta$    | MAT $\alpha$ , his3 $\Delta$ 1, leu2 $\Delta$ 0, lys2 $\Delta$ 0, ura3 $\Delta$ 0, tel1::KanMX4                                          | Giaever et al. (2002) |
| ybr028c $\Delta$ | MAT $\alpha$ , his3 $\Delta$ 1, leu2 $\Delta$ 0, lys2 $\Delta$ 0, ura3 $\Delta$ 0, ybr028c::KanMX4                                       | Giaever et al. (2002) |
| reg2 $\Delta$    | MAT $\alpha$ , his3 $\Delta$ 1, leu2 $\Delta$ 0, lys2 $\Delta$ 0, ura3 $\Delta$ 0, reg2::KanMX4                                          | Giaever et al. (2002) |
| akl1 $\Delta$    | MAT $\alpha$ , his3 $\Delta$ 1, leu2 $\Delta$ 0, lys2 $\Delta$ 0, ura3 $\Delta$ 0, akl1::KanMX4                                          | Giaever et al. (2002) |
| pho3 $\Delta$    | MAT $\alpha$ , his3 $\Delta$ 1, leu2 $\Delta$ 0, lys2 $\Delta$ 0, ura3 $\Delta$ 0, pho3::KanMX4                                          | Giaever et al. (2002) |
| pho5 $\Delta$    | MAT $\alpha$ , his3 $\Delta$ 1, leu2 $\Delta$ 0, lys2 $\Delta$ 0, ura3 $\Delta$ 0, pho5::KanMX4                                          | Giaever et al. (2002) |
| vps15 $\Delta$   | MAT $\alpha$ , his3 $\Delta$ 1, leu2 $\Delta$ 0, lys2 $\Delta$ 0, ura3 $\Delta$ 0, vps15::KanMX4                                         | Giaever et al. (2002) |
| ptc4 $\Delta$    | MAT $\alpha$ , his3 $\Delta$ 1, leu2 $\Delta$ 0, lys2 $\Delta$ 0, ura3 $\Delta$ 0, ptc4::KanMX4                                          | Giaever et al. (2002) |
| chk1 $\Delta$    | MAT $\alpha$ , his3 $\Delta$ 1, leu2 $\Delta$ 0, lys2 $\Delta$ 0, ura3 $\Delta$ 0, chk1::KanMX4                                          | Giaever et al. (2002) |
| pps1 $\Delta$    | MAT $\alpha$ , his3 $\Delta$ 1, leu2 $\Delta$ 0, lys2 $\Delta$ 0, ura3 $\Delta$ 0, pps1::KanMX4                                          | Giaever et al. (2002) |
| apm3 $\Delta$    | MAT $\alpha$ , his3 $\Delta$ 1, leu2 $\Delta$ 0, lys2 $\Delta$ 0, ura3 $\Delta$ 0, apm3::KanMX4                                          | Giaever et al. (2002) |
| kcc4 $\Delta$    | MAT $\alpha$ , his3 $\Delta$ 1, leu2 $\Delta$ 0, lys2 $\Delta$ 0, ura3 $\Delta$ 0, kcc4::KanMX4                                          | Giaever et al. (2002) |
| sat4 $\Delta$    | MAT $\alpha$ , his3 $\Delta$ 1, leu2 $\Delta$ 0, lys2 $\Delta$ 0, ura3 $\Delta$ 0, sat4::KanMX4                                          | Giaever et al. (2002) |
| ssk22 $\Delta$   | MAT $\alpha$ , his3 $\Delta$ 1, leu2 $\Delta$ 0, lys2 $\Delta$ 0, ura3 $\Delta$ 0, ssk22::KanMX4                                         | Giaever et al. (2002) |
| ycr079w $\Delta$ | MAT $\alpha$ , his3 $\Delta$ 1, leu2 $\Delta$ 0, lys2 $\Delta$ 0, ura3 $\Delta$ 0, ycr079w::KanMX4                                       | Giaever et al. (2002) |
| kin82 $\Delta$   | MAT $\alpha$ , his3 $\Delta$ 1, leu2 $\Delta$ 0, lys2 $\Delta$ 0, ura3 $\Delta$ 0, kin82::KanMX4                                         | Giaever et al. (2002) |
| ptc1 $\Delta$    | MAT $\alpha$ , his3 $\Delta$ 1, leu2 $\Delta$ 0, lys2 $\Delta$ 0, ura3 $\Delta$ 0, ptc1::KanMX4                                          | Giaever et al. (2002) |
| ydl025c $\Delta$ | MAT $\alpha$ , his3 $\Delta$ 1, leu2 $\Delta$ 0, lys2 $\Delta$ 0, ura3 $\Delta$ 0, ydl025c::KanMX4                                       | Giaever et al. (2002) |
| sit4 $\Delta$    | MAT $\alpha$ , his3 $\Delta$ 1, leu2 $\Delta$ 0, lys2 $\Delta$ 0, ura3 $\Delta$ 0, sit4::KanMX4                                          | Giaever et al. (2002) |
| mrk1 $\Delta$    | MAT $\alpha$ , his3 $\Delta$ 1, leu2 $\Delta$ 0, lys2 $\Delta$ 0, ura3 $\Delta$ 0, mrk1::KanMX4                                          | Giaever et al. (2002) |
| dun1 $\Delta$    | MAT $\alpha$ , his3 $\Delta$ 1, leu2 $\Delta$ 0, lys2 $\Delta$ 0, ura3 $\Delta$ 0, dun1::KanMX4                                          | Giaever et al. (2002) |
| hnt1 $\Delta$    | MAT $\alpha$ , his3 $\Delta$ 1, leu2 $\Delta$ 0, lys2 $\Delta$ 0, ura3 $\Delta$ 0, hnt1::KanMX4                                          | Giaever et al. (2002) |
| pph21 $\Delta$   | MAT $\alpha$ , his3 $\Delta$ 1, leu2 $\Delta$ 0, lys2 $\Delta$ 0, ura3 $\Delta$ 0, pph21::KanMX4                                         | Giaever et al. (2002) |
| ste7 $\Delta$    | MAT $\alpha$ , his3 $\Delta$ 1, leu2 $\Delta$ 0, lys2 $\Delta$ 0, ura3 $\Delta$ 0, ste7::KanMX4                                          | Giaever et al. (2002) |
| pcl9 $\Delta$    | MAT $\alpha$ , his3 $\Delta$ 1, leu2 $\Delta$ 0, lys2 $\Delta$ 0, ura3 $\Delta$ 0, pcl9::KanMX4                                          | Giaever et al. (2002) |
| oph22 $\Delta$   | MAT $\alpha$ , his3 $\Delta$ 1, leu2 $\Delta$ 0, lys2 $\Delta$ 0, ura3 $\Delta$ 0, oph22::KanMX4                                         | Giaever et al. (2002) |
| rbs1 $\Delta$    | MAT $\alpha$ , his3 $\Delta$ 1, leu2 $\Delta$ 0, lys2 $\Delta$ 0, ura3 $\Delta$ 0, rbs1::KanMX4                                          | Giaever et al. (2002) |
| prr2 $\Delta$    | MAT $\alpha$ , his3 $\Delta$ 1, leu2 $\Delta$ 0, lys2 $\Delta$ 0, ura3 $\Delta$ 0, prr2::KanMX4                                          | Giaever et al. (2002) |
| ptp1 $\Delta$    | MAT $\alpha$ , his3 $\Delta$ 1, leu2 $\Delta$ 0, lys2 $\Delta$ 0, ura3 $\Delta$ 0, ptp1::KanMX4                                          | Giaever et al. (2002) |
| sok1 $\Delta$    | MAT $\alpha$ , his3 $\Delta$ 1, leu2 $\Delta$ 0, lys2 $\Delta$ 0, ura3 $\Delta$ 0, sok1::KanMX4                                          | Giaever et al. (2002) |
| reg1 $\Delta$    | MAT $\alpha$ , his3 $\Delta$ 1, leu2 $\Delta$ 0, lys2 $\Delta$ 0, ura3 $\Delta$ 0, reg1::KanMX4                                          | Giaever et al. (2002) |
| tps2 $\Delta$    | MAT $\alpha$ , his3 $\Delta$ 1, leu2 $\Delta$ 0, lys2 $\Delta$ 0, ura3 $\Delta$ 0, tps2::KanMX4                                          | Giaever et al. (2002) |
| pph3 $\Delta$    | MAT $\alpha$ , his3 $\Delta$ 1, leu2 $\Delta$ 0, lys2 $\Delta$ 0, ura3 $\Delta$ 0, pph3::KanMX4                                          | Giaever et al. (2002) |
| kin1 $\Delta$    | MAT $\alpha$ , his3 $\Delta$ 1, leu2 $\Delta$ 0, lys2 $\Delta$ 0, ura3 $\Delta$ 0, kin1::KanMX4                                          | Giaever et al. (2002) |

|          |                                                       |                       |
|----------|-------------------------------------------------------|-----------------------|
| eki1Δ    | MATα, his3Δ1, leu2Δ0, lys2Δ0, ura3Δ0, eki1::KanMX4    | Giaever et al. (2002) |
| arg82Δ   | MATα, his3Δ1, leu2Δ0, lys2Δ0, ura3Δ0, arg82::KanMX4   | Giaever et al. (2002) |
| adk1Δ    | MATα, his3Δ1, leu2Δ0, lys2Δ0, ura3Δ0, adk1::KanMX4    | Giaever et al. (2002) |
| vhs1Δ    | MATα, his3Δ1, leu2Δ0, lys2Δ0, ura3Δ0, vhs1::KanMX4    | Giaever et al. (2002) |
| gcn2Δ    | MATα, his3Δ1, leu2Δ0, lys2Δ0, ura3Δ0, gcn2::KanMX4    | Giaever et al. (2002) |
| dpp1Δ    | MATα, his3Δ1, leu2Δ0, lys2Δ0, ura3Δ0, dpp1::KanMX4    | Giaever et al. (2002) |
| pro1Δ    | MATα, his3Δ1, leu2Δ0, lys2Δ0, ura3Δ0, pro1::KanMX4    | Giaever et al. (2002) |
| ipk1Δ    | MATα, his3Δ1, leu2Δ0, lys2Δ0, ura3Δ0, ipk1::KanMX4    | Giaever et al. (2002) |
| pex3Δ    | MATα, his3Δ1, leu2Δ0, lys2Δ0, ura3Δ0, pex3::KanMX4    | Giaever et al. (2002) |
| sip1Δ    | MATα, his3Δ1, leu2Δ0, lys2Δ0, ura3Δ0, sip1::KanMX4    | Giaever et al. (2002) |
| ppm1Δ    | MATα, his3Δ1, leu2Δ0, lys2Δ0, ura3Δ0, ppm1::KanMX4    | Giaever et al. (2002) |
| ppz2Δ    | MATα, his3Δ1, leu2Δ0, lys2Δ0, ura3Δ0, ppz2::KanMX4    | Giaever et al. (2002) |
| pkh3Δ    | MATα, his3Δ1, leu2Δ0, lys2Δ0, ura3Δ0, pkh3::KanMX4    | Giaever et al. (2002) |
| snf1Δ    | MATα, his3Δ1, leu2Δ0, lys2Δ0, ura3Δ0, snf1::KanMX4    | Giaever et al. (2002) |
| dig2Δ    | MATα, his3Δ1, leu2Δ0, lys2Δ0, ura3Δ0, dig2::KanMX4    | Giaever et al. (2002) |
| pho8Δ    | MATα, his3Δ1, leu2Δ0, lys2Δ0, ura3Δ0, pho8::KanMX4    | Giaever et al. (2002) |
| pkh1Δ    | MATα, his3Δ1, leu2Δ0, lys2Δ0, ura3Δ0, pkh1::KanMX4    | Giaever et al. (2002) |
| lpp1Δ    | MATα, his3Δ1, leu2Δ0, lys2Δ0, ura3Δ0, lpp1::KanMX4    | Giaever et al. (2002) |
| gin4Δ    | MATα, his3Δ1, leu2Δ0, lys2Δ0, ura3Δ0, gin4::KanMX4    | Giaever et al. (2002) |
| sps1Δ    | MATα, his3Δ1, leu2Δ0, lys2Δ0, ura3Δ0, sps1::KanMX4    | Giaever et al. (2002) |
| gal83Δ   | MATα, his3Δ1, leu2Δ0, lys2Δ0, ura3Δ0, gal83::KanMX4   | Giaever et al. (2002) |
| hom3Δ    | MATα, his3Δ1, leu2Δ0, lys2Δ0, ura3Δ0, hom3::KanMX4    | Giaever et al. (2002) |
| pcl6Δ    | MATα, his3Δ1, leu2Δ0, lys2Δ0, ura3Δ0, pcl6::KanMX4    | Giaever et al. (2002) |
| hor2Δ    | MATα, his3Δ1, leu2Δ0, lys2Δ0, ura3Δ0, hor2::KanMX4    | Giaever et al. (2002) |
| arg5,6Δ  | MATα, his3Δ1, leu2Δ0, lys2Δ0, ura3Δ0, arg5,6::KanMX4  | Giaever et al. (2002) |
| ptp3Δ    | MATα, his3Δ1, leu2Δ0, lys2Δ0, ura3Δ0, ptp3::KanMX4    | Giaever et al. (2002) |
| ptc2Δ    | MATα, his3Δ1, leu2Δ0, lys2Δ0, ura3Δ0, ptc2::KanMX4    | Giaever et al. (2002) |
| sho1Δ    | MATα, his3Δ1, leu2Δ0, lys2Δ0, ura3Δ0, sho1::KanMX4    | Giaever et al. (2002) |
| yck3Δ    | MATα, his3Δ1, leu2Δ0, lys2Δ0, ura3Δ0, yck3::KanMX4    | Giaever et al. (2002) |
| pak1Δ    | MATα, his3Δ1, leu2Δ0, lys2Δ0, ura3Δ0, pak1::KanMX4    | Giaever et al. (2002) |
| yer134cΔ | MATα, his3Δ1, leu2Δ0, lys2Δ0, ura3Δ0, yer134c::KanMX4 | Giaever et al. (2002) |
| bck2Δ    | MATα, his3Δ1, leu2Δ0, lys2Δ0, ura3Δ0, bck2::KanMX4    | Giaever et al. (2002) |
| adk2Δ    | MATα, his3Δ1, leu2Δ0, lys2Δ0, ura3Δ0, adk2::KanMX4    | Giaever et al. (2002) |
| rim15Δ   | MATα, his3Δ1, leu2Δ0, lys2Δ0, ura3Δ0, rim15::KanMX4   | Giaever et al. (2002) |
| dak2Δ    | MATα, his3Δ1, leu2Δ0, lys2Δ0, ura3Δ0, dak2::KanMX4    | Giaever et al. (2002) |
| gcn20Δ   | MATα, his3Δ1, leu2Δ0, lys2Δ0, ura3Δ0, gcn20::KanMX4   | Giaever et al. (2002) |
| cmk1Δ    | MATα, his3Δ1, leu2Δ0, lys2Δ0, ura3Δ0, cmk1::KanMX4    | Giaever et al. (2002) |
| fab1Δ    | MATα, his3Δ1, leu2Δ0, lys2Δ0, ura3Δ0, fab1::KanMX4    | Giaever et al. (2002) |
| his2Δ    | MATα, his3Δ1, leu2Δ0, lys2Δ0, ura3Δ0, his2::KanMX4    | Giaever et al. (2002) |
| ckb1Δ    | MATα, his3Δ1, leu2Δ0, lys2Δ0, ura3Δ0, ckb1::KanMX4    | Giaever et al. (2002) |
| alk1Δ    | MATα, his3Δ1, leu2Δ0, lys2Δ0, ura3Δ0, alk1::KanMX4    | Giaever et al. (2002) |
| scy1Δ    | MATα, his3Δ1, leu2Δ0, lys2Δ0, ura3Δ0, scy1::KanMX4    | Giaever et al. (2002) |
| snf4Δ    | MATα, his3Δ1, leu2Δ0, lys2Δ0, ura3Δ0, snf4::KanMX4    | Giaever et al. (2002) |
| rck1Δ    | MATα, his3Δ1, leu2Δ0, lys2Δ0, ura3Δ0, rck1::KanMX4    | Giaever et al. (2002) |
| tos3Δ    | MATα, his3Δ1, leu2Δ0, lys2Δ0, ura3Δ0, tos3::KanMX4    | Giaever et al. (2002) |
| atg1Δ    | MATα, his3Δ1, leu2Δ0, lys2Δ0, ura3Δ0, atg1::KanMX4    | Giaever et al. (2002) |



|          |                                                       |                       |
|----------|-------------------------------------------------------|-----------------------|
| gcn1Δ    | MATα, his3Δ1, leu2Δ0, lys2Δ0, ura3Δ0, gcn1::KanMX4    | Giaever et al. (2002) |
| sip2Δ    | MATα, his3Δ1, leu2Δ0, lys2Δ0, ura3Δ0, sip2::KanMX4    | Giaever et al. (2002) |
| hvk2Δ    | MATα, his3Δ1, leu2Δ0, lys2Δ0, ura3Δ0, hvk2::KanMX4    | Giaever et al. (2002) |
| cax4Δ    | MATα, his3Δ1, leu2Δ0, lys2Δ0, ura3Δ0, cax4::KanMX4    | Giaever et al. (2002) |
| kss1Δ    | MATα, his3Δ1, leu2Δ0, lys2Δ0, ura3Δ0, kss1::KanMX4    | Giaever et al. (2002) |
| fmp48Δ   | MATα, his3Δ1, leu2Δ0, lys2Δ0, ura3Δ0, fmp48::KanMX4   | Giaever et al. (2002) |
| rom1Δ    | MATα, his3Δ1, leu2Δ0, lys2Δ0, ura3Δ0, rom1::KanMX4    | Giaever et al. (2002) |
| pil1Δ    | MATα, his3Δ1, leu2Δ0, lys2Δ0, ura3Δ0, pil1::KanMX4    | Giaever et al. (2002) |
| dbf2Δ    | MATα, his3Δ1, leu2Δ0, lys2Δ0, ura3Δ0, dbf2::KanMX4    | Giaever et al. (2002) |
| ppt1Δ    | MATα, his3Δ1, leu2Δ0, lys2Δ0, ura3Δ0, ppt1::KanMX4    | Giaever et al. (2002) |
| bub1Δ    | MATα, his3Δ1, leu2Δ0, lys2Δ0, ura3Δ0, bub1::KanMX4    | Giaever et al. (2002) |
| xks1Δ    | MATα, his3Δ1, leu2Δ0, lys2Δ0, ura3Δ0, xks1::KanMX4    | Giaever et al. (2002) |
| ygr205wΔ | MATα, his3Δ1, leu2Δ0, lys2Δ0, ura3Δ0, ygr205w::KanMX4 | Giaever et al. (2002) |
| ser2Δ    | MATα, his3Δ1, leu2Δ0, lys2Δ0, ura3Δ0, ser2::KanMX4    | Giaever et al. (2002) |
| pho81Δ   | MATα, his3Δ1, leu2Δ0, lys2Δ0, ura3Δ0, pho81::KanMX4   | Giaever et al. (2002) |
| apl6Δ    | MATα, his3Δ1, leu2Δ0, lys2Δ0, ura3Δ0, apl6::KanMX4    | Giaever et al. (2002) |
| bud32Δ   | MATα, his3Δ1, leu2Δ0, lys2Δ0, ura3Δ0, bud32::KanMX4   | Giaever et al. (2002) |
| ste20Δ   | MATα, his3Δ1, leu2Δ0, lys2Δ0, ura3Δ0, ste20::KanMX4   | Giaever et al. (2002) |
| gut1Δ    | MATα, his3Δ1, leu2Δ0, lys2Δ0, ura3Δ0, gut1::KanMX4    | Giaever et al. (2002) |
| thr1Δ    | MATα, his3Δ1, leu2Δ0, lys2Δ0, ura3Δ0, thr1::KanMX4    | Giaever et al. (2002) |
| slt2Δ    | MATα, his3Δ1, leu2Δ0, lys2Δ0, ura3Δ0, slt2::KanMX4    | Giaever et al. (2002) |
| dog2Δ    | MATα, his3Δ1, leu2Δ0, lys2Δ0, ura3Δ0, dog2::KanMX4    | Giaever et al. (2002) |
| dog1Δ    | MATα, his3Δ1, leu2Δ0, lys2Δ0, ura3Δ0, dog1::KanMX4    | Giaever et al. (2002) |
| ppe1Δ    | MATα, his3Δ1, leu2Δ0, lys2Δ0, ura3Δ0, ppe1::KanMX4    | Giaever et al. (2002) |
| ptc7Δ    | MATα, his3Δ1, leu2Δ0, lys2Δ0, ura3Δ0, ptc7::KanMX4    | Giaever et al. (2002) |
| ire1Δ    | MATα, his3Δ1, leu2Δ0, lys2Δ0, ura3Δ0, ire1::KanMX4    | Giaever et al. (2002) |
| ksp1Δ    | MATα, his3Δ1, leu2Δ0, lys2Δ0, ura3Δ0, ksp1::KanMX4    | Giaever et al. (2002) |
| yck1Δ    | MATα, his3Δ1, leu2Δ0, lys2Δ0, ura3Δ0, yck1::KanMX4    | Giaever et al. (2002) |
| spl2Δ    | MATα, his3Δ1, leu2Δ0, lys2Δ0, ura3Δ0, spl2::KanMX4    | Giaever et al. (2002) |
| inp51Δ   | MATα, his3Δ1, leu2Δ0, lys2Δ0, ura3Δ0, inp51::KanMX4   | Giaever et al. (2002) |
| cka1Δ    | MATα, his3Δ1, leu2Δ0, lys2Δ0, ura3Δ0, cka1::KanMX4    | Giaever et al. (2002) |
| rhr2Δ    | MATα, his3Δ1, leu2Δ0, lys2Δ0, ura3Δ0, rhr2::KanMX4    | Giaever et al. (2002) |
| iks1Δ    | MATα, his3Δ1, leu2Δ0, lys2Δ0, ura3Δ0, iks1::KanMX4    | Giaever et al. (2002) |
| prk1Δ    | MATα, his3Δ1, leu2Δ0, lys2Δ0, ura3Δ0, prk1::KanMX4    | Giaever et al. (2002) |
| pfk26Δ   | MATα, his3Δ1, leu2Δ0, lys2Δ0, ura3Δ0, pfk26::KanMX4   | Giaever et al. (2002) |
| sdp1Δ    | MATα, his3Δ1, leu2Δ0, lys2Δ0, ura3Δ0, sdp1::KanMX4    | Giaever et al. (2002) |
| rrd1Δ    | MATα, his3Δ1, leu2Δ0, lys2Δ0, ura3Δ0, rrd1::KanMX4    | Giaever et al. (2002) |
| yvh1Δ    | MATα, his3Δ1, leu2Δ0, lys2Δ0, ura3Δ0, yvh1::KanMX4    | Giaever et al. (2002) |
| aps3Δ    | MATα, his3Δ1, leu2Δ0, lys2Δ0, ura3Δ0, aps3::KanMX4    | Giaever et al. (2002) |
| bck1Δ    | MATα, his3Δ1, leu2Δ0, lys2Δ0, ura3Δ0, bck1::KanMX4    | Giaever et al. (2002) |
| sap185Δ  | MATα, his3Δ1, leu2Δ0, lys2Δ0, ura3Δ0, sap185::KanMX4  | Giaever et al. (2002) |
| lsb6Δ    | MATα, his3Δ1, leu2Δ0, lys2Δ0, ura3Δ0, lsb6::KanMX4    | Giaever et al. (2002) |
| ime2Δ    | MATα, his3Δ1, leu2Δ0, lys2Δ0, ura3Δ0, ime2::KanMX4    | Giaever et al. (2002) |
| pbs2Δ    | MATα, his3Δ1, leu2Δ0, lys2Δ0, ura3Δ0, pbs2::KanMX4    | Giaever et al. (2002) |
| lcb3Δ    | MATα, his3Δ1, leu2Δ0, lys2Δ0, ura3Δ0, lcb3::KanMX4    | Giaever et al. (2002) |
| yak1Δ    | MATα, his3Δ1, leu2Δ0, lys2Δ0, ura3Δ0, yak1::KanMX4    | Giaever et al. (2002) |

|          |                                                       |                       |
|----------|-------------------------------------------------------|-----------------------|
| far1Δ    | MATα, his3Δ1, leu2Δ0, lys2Δ0, ura3Δ0, far1::KanMX4    | Giaever et al. (2002) |
| tpk1Δ    | MATα, his3Δ1, leu2Δ0, lys2Δ0, ura3Δ0, tpk1::KanMX4    | Giaever et al. (2002) |
| hal5Δ    | MATα, his3Δ1, leu2Δ0, lys2Δ0, ura3Δ0, hal5::KanMX4    | Giaever et al. (2002) |
| swe1Δ    | MATα, his3Δ1, leu2Δ0, lys2Δ0, ura3Δ0, swe1::KanMX4    | Giaever et al. (2002) |
| utr1Δ    | MATα, his3Δ1, leu2Δ0, lys2Δ0, ura3Δ0, utr1::KanMX4    | Giaever et al. (2002) |
| ptk2Δ    | MATα, his3Δ1, leu2Δ0, lys2Δ0, ura3Δ0, ptk2::KanMX4    | Giaever et al. (2002) |
| tor1Δ    | MATα, his3Δ1, leu2Δ0, lys2Δ0, ura3Δ0, tor1::KanMX4    | Giaever et al. (2002) |
| ado1Δ    | MATα, his3Δ1, leu2Δ0, lys2Δ0, ura3Δ0, ado1::KanMX4    | Giaever et al. (2002) |
| yml1Δ    | MATα, his3Δ1, leu2Δ0, lys2Δ0, ura3Δ0, yml1::KanMX4    | Giaever et al. (2002) |
| met14Δ   | MATα, his3Δ1, leu2Δ0, lys2Δ0, ura3Δ0, met14::KanMX4   | Giaever et al. (2002) |
| elm1Δ    | MATα, his3Δ1, leu2Δ0, lys2Δ0, ura3Δ0, elm1::KanMX4    | Giaever et al. (2002) |
| sfk1Δ    | MATα, his3Δ1, leu2Δ0, lys2Δ0, ura3Δ0, sfk1::KanMX4    | Giaever et al. (2002) |
| ynk1Δ    | MATα, his3Δ1, leu2Δ0, lys2Δ0, ura3Δ0, ynk1::KanMX4    | Giaever et al. (2002) |
| hsl1Δ    | MATα, his3Δ1, leu2Δ0, lys2Δ0, ura3Δ0, hsl1::KanMX4    | Giaever et al. (2002) |
| prl1Δ    | MATα, his3Δ1, leu2Δ0, lys2Δ0, ura3Δ0, prl1::KanMX4    | Giaever et al. (2002) |
| ypk1Δ    | MATα, his3Δ1, leu2Δ0, lys2Δ0, ura3Δ0, ypk1::KanMX4    | Giaever et al. (2002) |
| ctk1Δ    | MATα, his3Δ1, leu2Δ0, lys2Δ0, ura3Δ0, ctk1::KanMX4    | Giaever et al. (2002) |
| mlp1Δ    | MATα, his3Δ1, leu2Δ0, lys2Δ0, ura3Δ0, mlp1::KanMX4    | Giaever et al. (2002) |
| tpk3Δ    | MATα, his3Δ1, leu2Δ0, lys2Δ0, ura3Δ0, tpk3::KanMX4    | Giaever et al. (2002) |
| kkq8Δ    | MATα, his3Δ1, leu2Δ0, lys2Δ0, ura3Δ0, kkq8::KanMX4    | Giaever et al. (2002) |
| ykl171wΔ | MATα, his3Δ1, leu2Δ0, lys2Δ0, ura3Δ0, ykl171w::KanMX4 | Giaever et al. (2002) |
| ptk1Δ    | MATα, his3Δ1, leu2Δ0, lys2Δ0, ura3Δ0, ptk1::KanMX4    | Giaever et al. (2002) |
| sac1Δ    | MATα, his3Δ1, leu2Δ0, lys2Δ0, ura3Δ0, sac1::KanMX4    | Giaever et al. (2002) |
| sap190Δ  | MATα, his3Δ1, leu2Δ0, lys2Δ0, ura3Δ0, sap190::KanMX4  | Giaever et al. (2002) |
| ysr3Δ    | MATα, his3Δ1, leu2Δ0, lys2Δ0, ura3Δ0, ysr3::KanMX4    | Giaever et al. (2002) |
| psr1Δ    | MATα, his3Δ1, leu2Δ0, lys2Δ0, ura3Δ0, psr1::KanMX4    | Giaever et al. (2002) |
| kns1Δ    | MATα, his3Δ1, leu2Δ0, lys2Δ0, ura3Δ0, kns1::KanMX4    | Giaever et al. (2002) |
| ssk1Δ    | MATα, his3Δ1, leu2Δ0, lys2Δ0, ura3Δ0, ssk1::KanMX4    | Giaever et al. (2002) |
| psr2Δ    | MATα, his3Δ1, leu2Δ0, lys2Δ0, ura3Δ0, psr2::KanMX4    | Giaever et al. (2002) |
| sic1Δ    | MATα, his3Δ1, leu2Δ0, lys2Δ0, ura3Δ0, sic1::KanMX4    | Giaever et al. (2002) |
| kin2Δ    | MATα, his3Δ1, leu2Δ0, lys2Δ0, ura3Δ0, kin2::KanMX4    | Giaever et al. (2002) |
| hog1Δ    | MATα, his3Δ1, leu2Δ0, lys2Δ0, ura3Δ0, hog1::KanMX4    | Giaever et al. (2002) |
| cki1Δ    | MATα, his3Δ1, leu2Δ0, lys2Δ0, ura3Δ0, cki1::KanMX4    | Giaever et al. (2002) |
| vps34Δ   | MATα, his3Δ1, leu2Δ0, lys2Δ0, ura3Δ0, vps34::KanMX4   | Giaever et al. (2002) |
| rck2Δ    | MATα, his3Δ1, leu2Δ0, lys2Δ0, ura3Δ0, rck2::KanMX4    | Giaever et al. (2002) |
| lcb5Δ    | MATα, his3Δ1, leu2Δ0, lys2Δ0, ura3Δ0, lcb5::KanMX4    | Giaever et al. (2002) |
| ste11Δ   | MATα, his3Δ1, leu2Δ0, lys2Δ0, ura3Δ0, ste11::KanMX4   | Giaever et al. (2002) |
| ppz1Δ    | MATα, his3Δ1, leu2Δ0, lys2Δ0, ura3Δ0, ppz1::KanMX4    | Giaever et al. (2002) |
| pif1Δ    | MATα, his3Δ1, leu2Δ0, lys2Δ0, ura3Δ0, pif1::KanMX4    | Giaever et al. (2002) |
| dak1Δ    | MATα, his3Δ1, leu2Δ0, lys2Δ0, ura3Δ0, dak1::KanMX4    | Giaever et al. (2002) |
| tsl1Δ    | MATα, his3Δ1, leu2Δ0, lys2Δ0, ura3Δ0, tsl1::KanMX4    | Giaever et al. (2002) |
| ctk3Δ    | MATα, his3Δ1, leu2Δ0, lys2Δ0, ura3Δ0, ctk3::KanMX4    | Giaever et al. (2002) |
| mih1Δ    | MATα, his3Δ1, leu2Δ0, lys2Δ0, ura3Δ0, mih1::KanMX4    | Giaever et al. (2002) |
| ypk2Δ    | MATα, his3Δ1, leu2Δ0, lys2Δ0, ura3Δ0, ypk2::KanMX4    | Giaever et al. (2002) |
| tpp1Δ    | MATα, his3Δ1, leu2Δ0, lys2Δ0, ura3Δ0, tpp1::KanMX4    | Giaever et al. (2002) |
| cln1Δ    | MATα, his3Δ1, leu2Δ0, lys2Δ0, ura3Δ0, cln1::KanMX4    | Giaever et al. (2002) |

|          |                                                       |                       |
|----------|-------------------------------------------------------|-----------------------|
| tps3Δ    | MATα, his3Δ1, leu2Δ0, lys2Δ0, ura3Δ0, tps3::KanMX4    | Giaever et al. (2002) |
| ymr291wΔ | MATα, his3Δ1, leu2Δ0, lys2Δ0, ura3Δ0, ymr291w::KanMX4 | Giaever et al. (2002) |
| glc8Δ    | MATα, his3Δ1, leu2Δ0, lys2Δ0, ura3Δ0, glc8::KanMX4    | Giaever et al. (2002) |
| ark1Δ    | MATα, his3Δ1, leu2Δ0, lys2Δ0, ura3Δ0, ark1::KanMX4    | Giaever et al. (2002) |
| siw14Δ   | MATα, his3Δ1, leu2Δ0, lys2Δ0, ura3Δ0, siw14::KanMX4   | Giaever et al. (2002) |
| msg5Δ    | MATα, his3Δ1, leu2Δ0, lys2Δ0, ura3Δ0, msg5::KanMX4    | Giaever et al. (2002) |
| inp52Δ   | MATα, his3Δ1, leu2Δ0, lys2Δ0, ura3Δ0, inp52::KanMX4   | Giaever et al. (2002) |
| tep1Δ    | MATα, his3Δ1, leu2Δ0, lys2Δ0, ura3Δ0, tep1::KanMX4    | Giaever et al. (2002) |
| yck2Δ    | MATα, his3Δ1, leu2Δ0, lys2Δ0, ura3Δ0, yck2::KanMX4    | Giaever et al. (2002) |
| npr1Δ    | MATα, his3Δ1, leu2Δ0, lys2Δ0, ura3Δ0, npr1::KanMX4    | Giaever et al. (2002) |
| pcl1Δ    | MATα, his3Δ1, leu2Δ0, lys2Δ0, ura3Δ0, pcl1::KanMX4    | Giaever et al. (2002) |
| cla4Δ    | MATα, his3Δ1, leu2Δ0, lys2Δ0, ura3Δ0, cla4::KanMX4    | Giaever et al. (2002) |
| mck1Δ    | MATα, his3Δ1, leu2Δ0, lys2Δ0, ura3Δ0, mck1::KanMX4    | Giaever et al. (2002) |
| urk1Δ    | MATα, his3Δ1, leu2Δ0, lys2Δ0, ura3Δ0, urk1::KanMX4    | Giaever et al. (2002) |
| ssk2Δ    | MATα, his3Δ1, leu2Δ0, lys2Δ0, ura3Δ0, ssk2::KanMX4    | Giaever et al. (2002) |
| ppg1Δ    | MATα, his3Δ1, leu2Δ0, lys2Δ0, ura3Δ0, ppg1::KanMX4    | Giaever et al. (2002) |
| ynr047wΔ | MATα, his3Δ1, leu2Δ0, lys2Δ0, ura3Δ0, ynr047w::KanMX4 | Giaever et al. (2002) |
| pho80Δ   | MATα, his3Δ1, leu2Δ0, lys2Δ0, ura3Δ0, pho80::KanMX4   | Giaever et al. (2002) |
| cmk2Δ    | MATα, his3Δ1, leu2Δ0, lys2Δ0, ura3Δ0, cmk2::KanMX4    | Giaever et al. (2002) |
| psk2Δ    | MATα, his3Δ1, leu2Δ0, lys2Δ0, ura3Δ0, psk2::KanMX4    | Giaever et al. (2002) |
| thi20Δ   | MATα, his3Δ1, leu2Δ0, lys2Δ0, ura3Δ0, thi20::KanMX4   | Giaever et al. (2002) |
| inp54Δ   | MATα, his3Δ1, leu2Δ0, lys2Δ0, ura3Δ0, inp54::KanMX4   | Giaever et al. (2002) |
| pkh2Δ    | MATα, his3Δ1, leu2Δ0, lys2Δ0, ura3Δ0, pkh2::KanMX4    | Giaever et al. (2002) |
| skm1Δ    | MATα, his3Δ1, leu2Δ0, lys2Δ0, ura3Δ0, skm1::KanMX4    | Giaever et al. (2002) |
| ygk3Δ    | MATα, his3Δ1, leu2Δ0, lys2Δ0, ura3Δ0, ygk3::KanMX4    | Giaever et al. (2002) |
| pfk27Δ   | MATα, his3Δ1, leu2Δ0, lys2Δ0, ura3Δ0, pfk27::KanMX4   | Giaever et al. (2002) |
| yol138cΔ | MATα, his3Δ1, leu2Δ0, lys2Δ0, ura3Δ0, yol138c::KanMX4 | Giaever et al. (2002) |
| rts1Δ    | MATα, his3Δ1, leu2Δ0, lys2Δ0, ura3Δ0, rts1::KanMX4    | Giaever et al. (2002) |
| ckb2Δ    | MATα, his3Δ1, leu2Δ0, lys2Δ0, ura3Δ0, ckb2::KanMX4    | Giaever et al. (2002) |
| vhs3Δ    | MATα, his3Δ1, leu2Δ0, lys2Δ0, ura3Δ0, vhs3::KanMX4    | Giaever et al. (2002) |
| cka2Δ    | MATα, his3Δ1, leu2Δ0, lys2Δ0, ura3Δ0, cka2::KanMX4    | Giaever et al. (2002) |
| ptc5Δ    | MATα, his3Δ1, leu2Δ0, lys2Δ0, ura3Δ0, ptc5::KanMX4    | Giaever et al. (2002) |
| inp53Δ   | MATα, his3Δ1, leu2Δ0, lys2Δ0, ura3Δ0, inp53::KanMX4   | Giaever et al. (2002) |
| lcb4Δ    | MATα, his3Δ1, leu2Δ0, lys2Δ0, ura3Δ0, lcb4::KanMX4    | Giaever et al. (2002) |
| gac1Δ    | MATα, his3Δ1, leu2Δ0, lys2Δ0, ura3Δ0, gac1::KanMX4    | Giaever et al. (2002) |
| ptp2Δ    | MATα, his3Δ1, leu2Δ0, lys2Δ0, ura3Δ0, ptp2::KanMX4    | Giaever et al. (2002) |
| mkk1Δ    | MATα, his3Δ1, leu2Δ0, lys2Δ0, ura3Δ0, mkk1::KanMX4    | Giaever et al. (2002) |
| kin4Δ    | MATα, his3Δ1, leu2Δ0, lys2Δ0, ura3Δ0, kin4::KanMX4    | Giaever et al. (2002) |
| hrk1Δ    | MATα, his3Δ1, leu2Δ0, lys2Δ0, ura3Δ0, hrk1::KanMX4    | Giaever et al. (2002) |
| pyk2Δ    | MATα, his3Δ1, leu2Δ0, lys2Δ0, ura3Δ0, pyk2::KanMX4    | Giaever et al. (2002) |
| mek1Δ    | MATα, his3Δ1, leu2Δ0, lys2Δ0, ura3Δ0, mek1::KanMX4    | Giaever et al. (2002) |
| lsp1Δ    | MATα, his3Δ1, leu2Δ0, lys2Δ0, ura3Δ0, lsp1::KanMX4    | Giaever et al. (2002) |
| sks1Δ    | MATα, his3Δ1, leu2Δ0, lys2Δ0, ura3Δ0, sks1::KanMX4    | Giaever et al. (2002) |
| pho85Δ   | MATα, his3Δ1, leu2Δ0, lys2Δ0, ura3Δ0, pho85::KanMX4   | Giaever et al. (2002) |
| ssn3Δ    | MATα, his3Δ1, leu2Δ0, lys2Δ0, ura3Δ0, ssn3::KanMX4    | Giaever et al. (2002) |
| dig1Δ    | MATα, his3Δ1, leu2Δ0, lys2Δ0, ura3Δ0, dig1::KanMX4    | Giaever et al. (2002) |

|                   |                                                                              |                       |
|-------------------|------------------------------------------------------------------------------|-----------------------|
| bro1Δ             | MATα, his3Δ1, leu2Δ0, lys2Δ0, ura3Δ0, bro1::KanMX4                           | Giaever et al. (2002) |
| mkk2Δ             | MATα, his3Δ1, leu2Δ0, lys2Δ0, ura3Δ0, mkk2::KanMX4                           | Giaever et al. (2002) |
| ypl141cΔ          | MATα, his3Δ1, leu2Δ0, lys2Δ0, ura3Δ0, ypl141c::KanMX4                        | Giaever et al. (2002) |
| ypl150wΔ          | MATα, his3Δ1, leu2Δ0, lys2Δ0, ura3Δ0, ypl150w::KanMX4                        | Giaever et al. (2002) |
| ppq1Δ             | MATα, his3Δ1, leu2Δ0, lys2Δ0, ura3Δ0, ppq1::KanMX4                           | Giaever et al. (2002) |
| pos5Δ             | MATα, his3Δ1, leu2Δ0, lys2Δ0, ura3Δ0, pos5::KanMX4                           | Giaever et al. (2002) |
| apl5Δ             | MATα, his3Δ1, leu2Δ0, lys2Δ0, ura3Δ0, apl5::KanMX4                           | Giaever et al. (2002) |
| tpk2Δ             | MATα, his3Δ1, leu2Δ0, lys2Δ0, ura3Δ0, tpk2::KanMX4                           | Giaever et al. (2002) |
| thi6Δ             | MATα, his3Δ1, leu2Δ0, lys2Δ0, ura3Δ0, thi6::KanMX4                           | Giaever et al. (2002) |
| pcl8Δ             | MATα, his3Δ1, leu2Δ0, lys2Δ0, ura3Δ0, pcl8::KanMX4                           | Giaever et al. (2002) |
| ypl236cΔ          | MATα, his3Δ1, leu2Δ0, lys2Δ0, ura3Δ0, ypl236c::KanMX4                        | Giaever et al. (2002) |
| thi21Δ            | MATα, his3Δ1, leu2Δ0, lys2Δ0, ura3Δ0, thi21::KanMX4                          | Giaever et al. (2002) |
| smk1Δ             | MATα, his3Δ1, leu2Δ0, lys2Δ0, ura3Δ0, smk1::KanMX4                           | Giaever et al. (2002) |
| ltp1Δ             | MATα, his3Δ1, leu2Δ0, lys2Δ0, ura3Δ0, ltp1::KanMX4                           | Giaever et al. (2002) |
| isr1Δ             | MATα, his3Δ1, leu2Δ0, lys2Δ0, ura3Δ0, isr1::KanMX4                           | Giaever et al. (2002) |
| dbf20Δ            | MATα, his3Δ1, leu2Δ0, lys2Δ0, ura3Δ0, dbf20::KanMX4                          | Giaever et al. (2002) |
| thi22Δ            | MATα, his3Δ1, leu2Δ0, lys2Δ0, ura3Δ0, thi22::KanMX4                          | Giaever et al. (2002) |
| BY4742/POT1-GFP   | MATα, his3Δ1, leu2Δ0, lys2Δ0, ura3Δ0, pot1::POT1-GFP (HIS5)                  | This study            |
| tpd3Δ/POT1-GFP    | MATα, leu2Δ0, lys2Δ0, ura3Δ0, tpd3::KanMX4, pot1::POT1-GFP (natR)            | This study            |
| psk1Δ/POT1-GFP    | MATα, leu2Δ0, lys2Δ0, ura3Δ0, psk1::KanMX4, pot1::POT1-GFP (natR)            | This study            |
| cln3Δ/POT1-GFP    | MATα, leu2Δ0, lys2Δ0, ura3Δ0, cln3::KanMX4, pot1::POT1-GFP (natR)            | This study            |
| kin3Δ/POT1-GFP    | MATα, leu2Δ0, lys2Δ0, ura3Δ0, kin3::KanMX4, pot1::POT1-GFP (natR)            | This study            |
| fus3Δ/POT1-GFP    | MATα, his3Δ1, leu2Δ0, lys2Δ0, ura3Δ0, fus3::KanMX4, pot1::POT1-GFP (HIS5)    | This study            |
| ptc3Δ/POT1-GFP    | MATα, his3Δ1, leu2Δ0, lys2Δ0, ura3Δ0, ptc3::KanMX4, pot1::POT1-GFP (HIS5)    | This study            |
| tel1Δ/POT1-GFP    | MATα, his3Δ1, leu2Δ0, lys2Δ0, ura3Δ0, tel1::KanMX4, pot1::POT1-GFP (HIS5)    | This study            |
| ybr028cΔ/POT1-GFP | MATα, his3Δ1, leu2Δ0, lys2Δ0, ura3Δ0, ybr028c::KanMX4, pot1::POT1-GFP (HIS5) | This study            |
| reg2Δ/POT1-GFP    | MATα, his3Δ1, leu2Δ0, lys2Δ0, ura3Δ0, reg2::KanMX4, pot1::POT1-GFP (HIS5)    | This study            |
| akl1Δ/POT1-GFP    | MATα, his3Δ1, leu2Δ0, lys2Δ0, ura3Δ0, akl1::KanMX4, pot1::POT1-GFP (HIS5)    | This study            |
| pho3Δ/POT1-GFP    | MATα, his3Δ1, leu2Δ0, lys2Δ0, ura3Δ0, pho3::KanMX4, pot1::POT1-GFP (HIS5)    | This study            |
| pho5Δ/POT1-GFP    | MATα, his3Δ1, leu2Δ0, lys2Δ0, ura3Δ0, pho5::KanMX4, pot1::POT1-GFP (HIS5)    | This study            |
| vps15Δ/POT1-GFP   | MATα, his3Δ1, leu2Δ0, lys2Δ0, ura3Δ0, vps15::KanMX4, pot1::POT1-GFP (HIS5)   | This study            |
| ptc4Δ/POT1-GFP    | MATα, his3Δ1, leu2Δ0, lys2Δ0, ura3Δ0, ptc4::KanMX4, pot1::POT1-GFP (HIS5)    | This study            |
| chk1Δ/POT1-GFP    | MATα, his3Δ1, leu2Δ0, lys2Δ0, ura3Δ0, chk1::KanMX4, pot1::POT1-GFP (HIS5)    | This study            |
| pps1Δ/POT1-GFP    | MATα, his3Δ1, leu2Δ0, lys2Δ0, ura3Δ0, pps1::KanMX4, pot1::POT1-GFP (HIS5)    | This study            |
| apm3Δ/POT1-GFP    | MATα, his3Δ1, leu2Δ0, lys2Δ0, ura3Δ0, apm3::KanMX4, pot1::POT1-GFP (HIS5)    | This study            |
| kcc4Δ/POT1-GFP    | MATα, his3Δ1, leu2Δ0, lys2Δ0, ura3Δ0, kcc4::KanMX4, pot1::POT1-GFP (HIS5)    | This study            |
| sat4Δ/POT1-GFP    | MATα, his3Δ1, leu2Δ0, lys2Δ0, ura3Δ0, sat4::KanMX4, pot1::POT1-GFP (HIS5)    | This study            |
| ssk22Δ/POT1-GFP   | MATα, his3Δ1, leu2Δ0, lys2Δ0, ura3Δ0, ssk22::KanMX4, pot1::POT1-GFP (HIS5)   | This study            |
| ycr079wΔ/POT1-GFP | MATα, his3Δ1, leu2Δ0, lys2Δ0, ura3Δ0, ycr079w::KanMX4, pot1::POT1-GFP (HIS5) | This study            |
| kin82Δ/POT1-GFP   | MATα, his3Δ1, leu2Δ0, lys2Δ0, ura3Δ0, kin82::KanMX4, pot1::POT1-GFP (HIS5)   | This study            |
| ptc1Δ/POT1-GFP    | MATα, his3Δ1, leu2Δ0, lys2Δ0, ura3Δ0, ptc1::KanMX4, pot1::POT1-GFP (HIS5)    | This study            |
| yd1025cΔ/POT1-GFP | MATα, his3Δ1, leu2Δ0, lys2Δ0, ura3Δ0, yd1025c::KanMX4, pot1::POT1-GFP (HIS5) | This study            |
| sit4Δ/POT1-GFP    | MATα, his3Δ1, leu2Δ0, lys2Δ0, ura3Δ0, sit4::KanMX4, pot1::POT1-GFP (HIS5)    | This study            |
| mrk1Δ/POT1-GFP    | MATα, his3Δ1, leu2Δ0, lys2Δ0, ura3Δ0, mrk1::KanMX4, pot1::POT1-GFP (HIS5)    | This study            |
| dun1Δ/POT1-GFP    | MATα, his3Δ1, leu2Δ0, lys2Δ0, ura3Δ0, dun1::KanMX4, pot1::POT1-GFP (HIS5)    | This study            |
| hnt1Δ/POT1-GFP    | MATα, his3Δ1, leu2Δ0, lys2Δ0, ura3Δ0, hnt1::KanMX4, pot1::POT1-GFP (HIS5)    | This study            |







|                   |                                                                              |            |
|-------------------|------------------------------------------------------------------------------|------------|
| rck2Δ/POT1-GFP    | MATα, his3Δ1, leu2Δ0, lys2Δ0, ura3Δ0, rck2::KanMX4, pot1::POT1-GFP (HIS5)    | This study |
| lcb5Δ/POT1-GFP    | MATα, his3Δ1, leu2Δ0, lys2Δ0, ura3Δ0, lcb5::KanMX4, pot1::POT1-GFP (HIS5)    | This study |
| ste11Δ/POT1-GFP   | MATα, his3Δ1, leu2Δ0, lys2Δ0, ura3Δ0, ste11::KanMX4, pot1::POT1-GFP (HIS5)   | This study |
| ppz1Δ/POT1-GFP    | MATα, his3Δ1, leu2Δ0, lys2Δ0, ura3Δ0, ppz1::KanMX4, pot1::POT1-GFP (HIS5)    | This study |
| pif1Δ/POT1-GFP    | MATα, his3Δ1, leu2Δ0, lys2Δ0, ura3Δ0, pif1::KanMX4, pot1::POT1-GFP (HIS5)    | This study |
| dak1Δ/POT1-GFP    | MATα, his3Δ1, leu2Δ0, lys2Δ0, ura3Δ0, dak1::KanMX4, pot1::POT1-GFP (HIS5)    | This study |
| tsl1Δ/POT1-GFP    | MATα, his3Δ1, leu2Δ0, lys2Δ0, ura3Δ0, tsl1::KanMX4, pot1::POT1-GFP (HIS5)    | This study |
| ctk3Δ/POT1-GFP    | MATα, his3Δ1, leu2Δ0, lys2Δ0, ura3Δ0, ctk3::KanMX4, pot1::POT1-GFP (HIS5)    | This study |
| mih1Δ/POT1-GFP    | MATα, his3Δ1, leu2Δ0, lys2Δ0, ura3Δ0, mih1::KanMX4, pot1::POT1-GFP (HIS5)    | This study |
| ypk2Δ/POT1-GFP    | MATα, his3Δ1, leu2Δ0, lys2Δ0, ura3Δ0, ypk2::KanMX4, pot1::POT1-GFP (HIS5)    | This study |
| tpp1Δ/POT1-GFP    | MATα, his3Δ1, leu2Δ0, lys2Δ0, ura3Δ0, tpp1::KanMX4, pot1::POT1-GFP (HIS5)    | This study |
| cln1Δ/POT1-GFP    | MATα, his3Δ1, leu2Δ0, lys2Δ0, ura3Δ0, cln1::KanMX4, pot1::POT1-GFP (HIS5)    | This study |
| tps3Δ/POT1-GFP    | MATα, his3Δ1, leu2Δ0, lys2Δ0, ura3Δ0, tps3::KanMX4, pot1::POT1-GFP (HIS5)    | This study |
| ymr291wΔ/POT1-GFP | MATα, his3Δ1, leu2Δ0, lys2Δ0, ura3Δ0, ymr291w::KanMX4, pot1::POT1-GFP (HIS5) | This study |
| glc8Δ/POT1-GFP    | MATα, his3Δ1, leu2Δ0, lys2Δ0, ura3Δ0, glc8::KanMX4, pot1::POT1-GFP (HIS5)    | This study |
| ark1Δ/POT1-GFP    | MATα, his3Δ1, leu2Δ0, lys2Δ0, ura3Δ0, ark1::KanMX4, pot1::POT1-GFP (HIS5)    | This study |
| siw14Δ/POT1-GFP   | MATα, his3Δ1, leu2Δ0, lys2Δ0, ura3Δ0, siw14::KanMX4, pot1::POT1-GFP (HIS5)   | This study |
| msg5Δ/POT1-GFP    | MATα, his3Δ1, leu2Δ0, lys2Δ0, ura3Δ0, msg5::KanMX4, pot1::POT1-GFP (HIS5)    | This study |
| inp52Δ/POT1-GFP   | MATα, his3Δ1, leu2Δ0, lys2Δ0, ura3Δ0, inp52::KanMX4, pot1::POT1-GFP (HIS5)   | This study |
| tep1Δ/POT1-GFP    | MATα, his3Δ1, leu2Δ0, lys2Δ0, ura3Δ0, tep1::KanMX4, pot1::POT1-GFP (HIS5)    | This study |
| yck2Δ/POT1-GFP    | MATα, his3Δ1, leu2Δ0, lys2Δ0, ura3Δ0, yck2::KanMX4, pot1::POT1-GFP (HIS5)    | This study |
| npr1Δ/POT1-GFP    | MATα, his3Δ1, leu2Δ0, lys2Δ0, ura3Δ0, npr1::KanMX4, pot1::POT1-GFP (HIS5)    | This study |
| pcl1Δ/POT1-GFP    | MATα, his3Δ1, leu2Δ0, lys2Δ0, ura3Δ0, pcl1::KanMX4, pot1::POT1-GFP (HIS5)    | This study |
| cla4Δ/POT1-GFP    | MATα, his3Δ1, leu2Δ0, lys2Δ0, ura3Δ0, cla4::KanMX4, pot1::POT1-GFP (HIS5)    | This study |
| mck1Δ/POT1-GFP    | MATα, his3Δ1, leu2Δ0, lys2Δ0, ura3Δ0, mck1::KanMX4, pot1::POT1-GFP (HIS5)    | This study |
| urk1Δ/POT1-GFP    | MATα, his3Δ1, leu2Δ0, lys2Δ0, ura3Δ0, urk1::KanMX4, pot1::POT1-GFP (HIS5)    | This study |
| ssk2Δ/POT1-GFP    | MATα, his3Δ1, leu2Δ0, lys2Δ0, ura3Δ0, ssk1::KanMX4, pot1::POT1-GFP (HIS5)    | This study |
| ppg1Δ/POT1-GFP    | MATα, his3Δ1, leu2Δ0, lys2Δ0, ura3Δ0, ppg1::KanMX4, pot1::POT1-GFP (HIS5)    | This study |
| ynr047wΔ/POT1-GFP | MATα, his3Δ1, leu2Δ0, lys2Δ0, ura3Δ0, ynr047w::KanMX4, pot1::POT1-GFP (HIS5) | This study |
| pho80Δ/POT1-GFP   | MATα, his3Δ1, leu2Δ0, lys2Δ0, ura3Δ0, pho80::KanMX4, pot1::POT1-GFP (HIS5)   | This study |
| cmk2Δ/POT1-GFP    | MATα, his3Δ1, leu2Δ0, lys2Δ0, ura3Δ0, cmk2::KanMX4, pot1::POT1-GFP (HIS5)    | This study |
| psk2Δ/POT1-GFP    | MATα, his3Δ1, leu2Δ0, lys2Δ0, ura3Δ0, psk2::KanMX4, pot1::POT1-GFP (HIS5)    | This study |
| thi20Δ/POT1-GFP   | MATα, his3Δ1, leu2Δ0, lys2Δ0, ura3Δ0, thi20::KanMX4, pot1::POT1-GFP (HIS5)   | This study |
| inp54Δ/POT1-GFP   | MATα, his3Δ1, leu2Δ0, lys2Δ0, ura3Δ0, inp54::KanMX4, pot1::POT1-GFP (HIS5)   | This study |
| pkh2Δ/POT1-GFP    | MATα, his3Δ1, leu2Δ0, lys2Δ0, ura3Δ0, pkh2::KanMX4, pot1::POT1-GFP (HIS5)    | This study |
| skm1Δ/POT1-GFP    | MATα, his3Δ1, leu2Δ0, lys2Δ0, ura3Δ0, skm1::KanMX4, pot1::POT1-GFP (HIS5)    | This study |
| ygk3Δ/POT1-GFP    | MATα, his3Δ1, leu2Δ0, lys2Δ0, ura3Δ0, ykg3::KanMX4, pot1::POT1-GFP (HIS5)    | This study |
| pfk27Δ/POT1-GFP   | MATα, his3Δ1, leu2Δ0, lys2Δ0, ura3Δ0, pfk27::KanMX4, pot1::POT1-GFP (HIS5)   | This study |
| yol138cΔ/POT1-GFP | MATα, his3Δ1, leu2Δ0, lys2Δ0, ura3Δ0, yol138c::KanMX4, pot1::POT1-GFP (HIS5) | This study |
| rts1Δ/POT1-GFP    | MATα, his3Δ1, leu2Δ0, lys2Δ0, ura3Δ0, rts1::KanMX4, pot1::POT1-GFP (HIS5)    | This study |
| ckb2Δ/POT1-GFP    | MATα, his3Δ1, leu2Δ0, lys2Δ0, ura3Δ0, ckb2::KanMX4, pot1::POT1-GFP (HIS5)    | This study |
| vhs3Δ/POT1-GFP    | MATα, his3Δ1, leu2Δ0, lys2Δ0, ura3Δ0, vhs3::KanMX4, pot1::POT1-GFP (HIS5)    | This study |
| cka2Δ/POT1-GFP    | MATα, his3Δ1, leu2Δ0, lys2Δ0, ura3Δ0, cka2::KanMX4, pot1::POT1-GFP (HIS5)    | This study |
| ptc5Δ/POT1-GFP    | MATα, his3Δ1, leu2Δ0, lys2Δ0, ura3Δ0, ptc5::KanMX4, pot1::POT1-GFP (HIS5)    | This study |
| inp53Δ/POT1-GFP   | MATα, his3Δ1, leu2Δ0, lys2Δ0, ura3Δ0, inp53::KanMX4, pot1::POT1-GFP (HIS5)   | This study |
| lcb4Δ/POT1-GFP    | MATα, his3Δ1, leu2Δ0, lys2Δ0, ura3Δ0, lcb4::KanMX4, pot1::POT1-GFP (HIS5)    | This study |



|                           |                                                                                                                 |            |
|---------------------------|-----------------------------------------------------------------------------------------------------------------|------------|
| gac1Δ/POT1-GFP            | MATα, his3Δ1, leu2Δ0, lys2Δ0, ura3Δ0, gac1::KanMX4, pot1::POT1-GFP (HIS5)                                       | This study |
| ptp2Δ/POT1-GFP            | MATα, his3Δ1, leu2Δ0, lys2Δ0, ura3Δ0, ptp2::KanMX4, pot1::POT1-GFP (HIS5)                                       | This study |
| mkk1Δ/POT1-GFP            | MATα, his3Δ1, leu2Δ0, lys2Δ0, ura3Δ0, mkk1::KanMX4, pot1::POT1-GFP (HIS5)                                       | This study |
| kin4Δ/POT1-GFP            | MATα, his3Δ1, leu2Δ0, lys2Δ0, ura3Δ0, kin4::KanMX4, pot1::POT1-GFP (HIS5)                                       | This study |
| hrk1Δ/POT1-GFP            | MATα, his3Δ1, leu2Δ0, lys2Δ0, ura3Δ0, hrk1::KanMX4, pot1::POT1-GFP (HIS5)                                       | This study |
| pyk2Δ/POT1-GFP            | MATα, his3Δ1, leu2Δ0, lys2Δ0, ura3Δ0, pyk2::KanMX4, pot1::POT1-GFP (HIS5)                                       | This study |
| mek1Δ/POT1-GFP            | MATα, his3Δ1, leu2Δ0, lys2Δ0, ura3Δ0, mek1::KanMX4, pot1::POT1-GFP (HIS5)                                       | This study |
| lsp1Δ/POT1-GFP            | MATα, his3Δ1, leu2Δ0, lys2Δ0, ura3Δ0, lsp1::KanMX4, pot1::POT1-GFP (HIS5)                                       | This study |
| sks1Δ/POT1-GFP            | MATα, his3Δ1, leu2Δ0, lys2Δ0, ura3Δ0, sks1::KanMX4, pot1::POT1-GFP (HIS5)                                       | This study |
| pho85Δ/POT1-GFP           | MATα, his3Δ1, leu2Δ0, lys2Δ0, ura3Δ0, pho85::KanMX4, pot1::POT1-GFP (HIS5)                                      | This study |
| ssn3Δ/POT1-GFP            | MATα, his3Δ1, leu2Δ0, lys2Δ0, ura3Δ0, ssn3::KanMX4, pot1::POT1-GFP (HIS5)                                       | This study |
| dig1Δ/POT1-GFP            | MATα, his3Δ1, leu2Δ0, lys2Δ0, ura3Δ0, dig1::KanMX4, pot1::POT1-GFP (HIS5)                                       | This study |
| bro1Δ/POT1-GFP            | MATα, his3Δ1, leu2Δ0, lys2Δ0, ura3Δ0, bro1::KanMX4, pot1::POT1-GFP (HIS5)                                       | This study |
| mkk2Δ/POT1-GFP            | MATα, his3Δ1, leu2Δ0, lys2Δ0, ura3Δ0, mkk2::KanMX4, pot1::POT1-GFP (HIS5)                                       | This study |
| ypl141cΔ/POT1-GFP         | MATα, his3Δ1, leu2Δ0, lys2Δ0, ura3Δ0, ypl141c::KanMX4, pot1::POT1-GFP (HIS5)                                    | This study |
| ypl150wΔ/POT1-GFP         | MATα, his3Δ1, leu2Δ0, lys2Δ0, ura3Δ0, ypl150w::KanMX4, pot1::POT1-GFP (HIS5)                                    | This study |
| ppq1Δ/POT1-GFP            | MATα, his3Δ1, leu2Δ0, lys2Δ0, ura3Δ0, ppq1::KanMX4, pot1::POT1-GFP (HIS5)                                       | This study |
| pos5Δ/POT1-GFP            | MATα, his3Δ1, leu2Δ0, lys2Δ0, ura3Δ0, pos5::KanMX4, pot1::POT1-GFP (HIS5)                                       | This study |
| apl5Δ/POT1-GFP            | MATα, his3Δ1, leu2Δ0, lys2Δ0, ura3Δ0, apl5::KanMX4, pot1::POT1-GFP (HIS5)                                       | This study |
| tpk2Δ/POT1-GFP            | MATα, his3Δ1, leu2Δ0, lys2Δ0, ura3Δ0, tpk2::KanMX4, pot1::POT1-GFP (HIS5)                                       | This study |
| thi6Δ/POT1-GFP            | MATα, his3Δ1, leu2Δ0, lys2Δ0, ura3Δ0, thi6::KanMX4, pot1::POT1-GFP (HIS5)                                       | This study |
| pcl8Δ/POT1-GFP            | MATα, his3Δ1, leu2Δ0, lys2Δ0, ura3Δ0, pcl8::KanMX4, pot1::POT1-GFP (HIS5)                                       | This study |
| ypl236cΔ/POT1-GFP         | MATα, his3Δ1, leu2Δ0, lys2Δ0, ura3Δ0, ypl236c::KanMX4, pot1::POT1-GFP (HIS5)                                    | This study |
| thi21Δ/POT1-GFP           | MATα, his3Δ1, leu2Δ0, lys2Δ0, ura3Δ0, thi21::KanMX4, pot1::POT1-GFP (HIS5)                                      | This study |
| smk1Δ/POT1-GFP            | MATα, his3Δ1, leu2Δ0, lys2Δ0, ura3Δ0, smk1::KanMX4, pot1::POT1-GFP (HIS5)                                       | This study |
| ltp1Δ/POT1-GFP            | MATα, his3Δ1, leu2Δ0, lys2Δ0, ura3Δ0, ltp1::KanMX4, pot1::POT1-GFP (HIS5)                                       | This study |
| isr1Δ/POT1-GFP            | MATα, his3Δ1, leu2Δ0, lys2Δ0, ura3Δ0, isr1::KanMX4, pot1::POT1-GFP (HIS5)                                       | This study |
| dbf20Δ/POT1-GFP           | MATα, his3Δ1, leu2Δ0, lys2Δ0, ura3Δ0, dbf20::KanMX4, pot1::POT1-GFP (HIS5)                                      | This study |
| thi22Δ/POT1-GFP           | MATα, his3Δ1, leu2Δ0, lys2Δ0, ura3Δ0, thi22::KanMX4, pot1::POT1-GFP (HIS5)                                      | This study |
| BY4742/POT1-GFP/FOX2-mRFP | MATα, his3Δ1, leu2Δ0, lys2Δ0, ura3Δ0, pot1::POT1-GFP (HIS5), fox2::FOX2-mRFP (URA3)                             | This study |
| snf1Δ/POT1-GFP/FOX2-mRFP  | MATα, his3Δ1, leu2Δ0, lys2Δ0, ura3Δ0, snf1::KanMX4, pot1::POT1-GFP (HIS5), fox2::FOX2-mRFP (URA3)               | This study |
| slt2Δ/POT1-GFP/FOX2-mRFP  | MATα, his3Δ1, leu2Δ0, lys2Δ0, ura3Δ0, slt2::KanMX4, pot1::POT1-GFP (HIS5), fox2::FOX2-mRFP (URA3)               | This study |
| ste11Δ/POT1-GFP/FOX2-mRFP | MATα, his3Δ1, leu2Δ0, lys2Δ0, ura3Δ0, ste11::KanMX4, pot1::POT1-GFP (HIS5), fox2::FOX2-mRFP (URA3)              | This study |
| yak1Δ/POT1-GFP/FOX2-mRFP  | MATα, his3Δ1, leu2Δ0, lys2Δ0, ura3Δ0, yak1::KanMX4, pot1::POT1-GFP (HIS5), fox2::FOX2-mRFP (URA3)               | This study |
| BY4743/SNF1-GFP/PEX3-mRFP | MATα/α, his3Δ1/his3Δ1, leu2Δ0/leu2Δ0, lys2Δ0/LYS2, MET15/met15Δ0, snf1::SNF1-GFP (HIS5), pex3::PEX3-mRFP (URA3) | This study |
| BY4743/SIP1-GFP/PEX3-mRFP | MATα/α, his3Δ1/his3Δ1, leu2Δ0/leu2Δ0, lys2Δ0/LYS2, MET15/met15Δ0, sip1::SIP1-GFP (HIS5), pex3::PEX3-mRFP (URA3) | This study |
| BY4743/ADR1-GFP/PEX3-mRFP | MATα/α, his3Δ1/his3Δ1, leu2Δ0/leu2Δ0, lys2Δ0/LYS2, MET15/met15Δ0, adr1::ADR1-GFP (HIS5), pex3::PEX3-mRFP (URA3) | This study |
| BY4743/OAF1-GFP/PEX3-mRFP | MATα/α, his3Δ1/his3Δ1, leu2Δ0/leu2Δ0, lys2Δ0/LYS2, MET15/met15Δ0, oaf1::OAF1-GFP (HIS5), pex3::PEX3-mRFP (URA3) | This study |
| BY4743/PIP2-GFP/PEX3-mRFP | MATα/α, his3Δ1/his3Δ1, leu2Δ0/leu2Δ0, lys2Δ0/LYS2, MET15/met15Δ0, pip2::PIP2-GFP (HIS5), pex3::PEX3-mRFP (URA3) | This study |
| BY4743/ADR1-GFP/RTN1-mRFP | MATα/α, his3Δ1/his3Δ1, leu2Δ0/leu2Δ0, lys2Δ0/LYS2, MET15/met15Δ0, adr1::ADR1-GFP (HIS5), pex3::PEX3-mRFP (URA3) | This study |
| BY4743/OAF1-GFP/RTN1-mRFP | MATα/α, his3Δ1/his3Δ1, leu2Δ0/leu2Δ0, lys2Δ0/LYS2, MET15/met15Δ0, oaf1::OAF1-GFP (HIS5), rtn1::RTN1-mRFP (URA3) | This study |
| BY4743/PIP2-GFP/RTN1-mRFP | MATα/α, his3Δ1/his3Δ1, leu2Δ0/leu2Δ0, lys2Δ0/LYS2, MET15/met15Δ0, pip2::PIP2-GFP (HIS5), rtn1::RTN1-mRFP (URA3) | This study |

Giaever, G., A.M. Chu, N. L., C. Connelly, L. Riles, S. Veronneau, S. Dow, A. Lucanu-Danila, K. Anderson, B. Andre, A.P. Arkin, A. Astromoff, M. El-Bakkoury, R. Bangham, R. Benito, S. Brachat, S. Campanaro, M. Curtiss, K. Davis, A. Deutschbauer, K.D. Entian, P. Flaherty, F. Foury, D.J. Garfinkel, M. Gerstein, D. Gotte, U. Guldener, J.H. Hegemann, S. Hempel, Z. Herman, D.F. Jaramillo, D.E. Kelly, S.L. Kelly, P. Koitter, D. LaBonte, D.C. Lamb, N. Lan, H. Liang, H. Liao, L. Liu, C. Luo, M. Lussier, R. Mao, P. Menard, S.L. Ooi, J.L. Revuelta, C.J. Roberts, M. Rose, P. Ross-Macdonald, B. Scherens, G. Schimmack, B. Shafer, D.D. Shoemaker, S. Sookhai-Mahadeo, R.K. Storms, J.N. Strathern, G. Valle, M. Voet, G. Volckaert, C.Y. Wang, T.R. Ward, J. Wilhelmly, E.A. Winzeler, Y. Yang, G. Yen, E. Youngman, K. Yu, H. Bussey, J.D. Boeke, M. Snyder, P. Philippsen, R.W. Davis, and M. Johnston. 2002. Functional profiling of the *Saccharomyces cerevisiae* genome. *Nature*. 418:387–391.
