# Supplementary figures and images for: Genome-wide analysis of signaling networks regulating fatty acid–induced gene expression and organelle biogenesis
Source: PubMed Central journal article supplement — J Cell Biol. 2008 Apr 21;181(2):281–92. doi: 10.1083/jcb.200710009 (PMC2315675; doi:10.1083/jcb.200710009), 2008-04-21

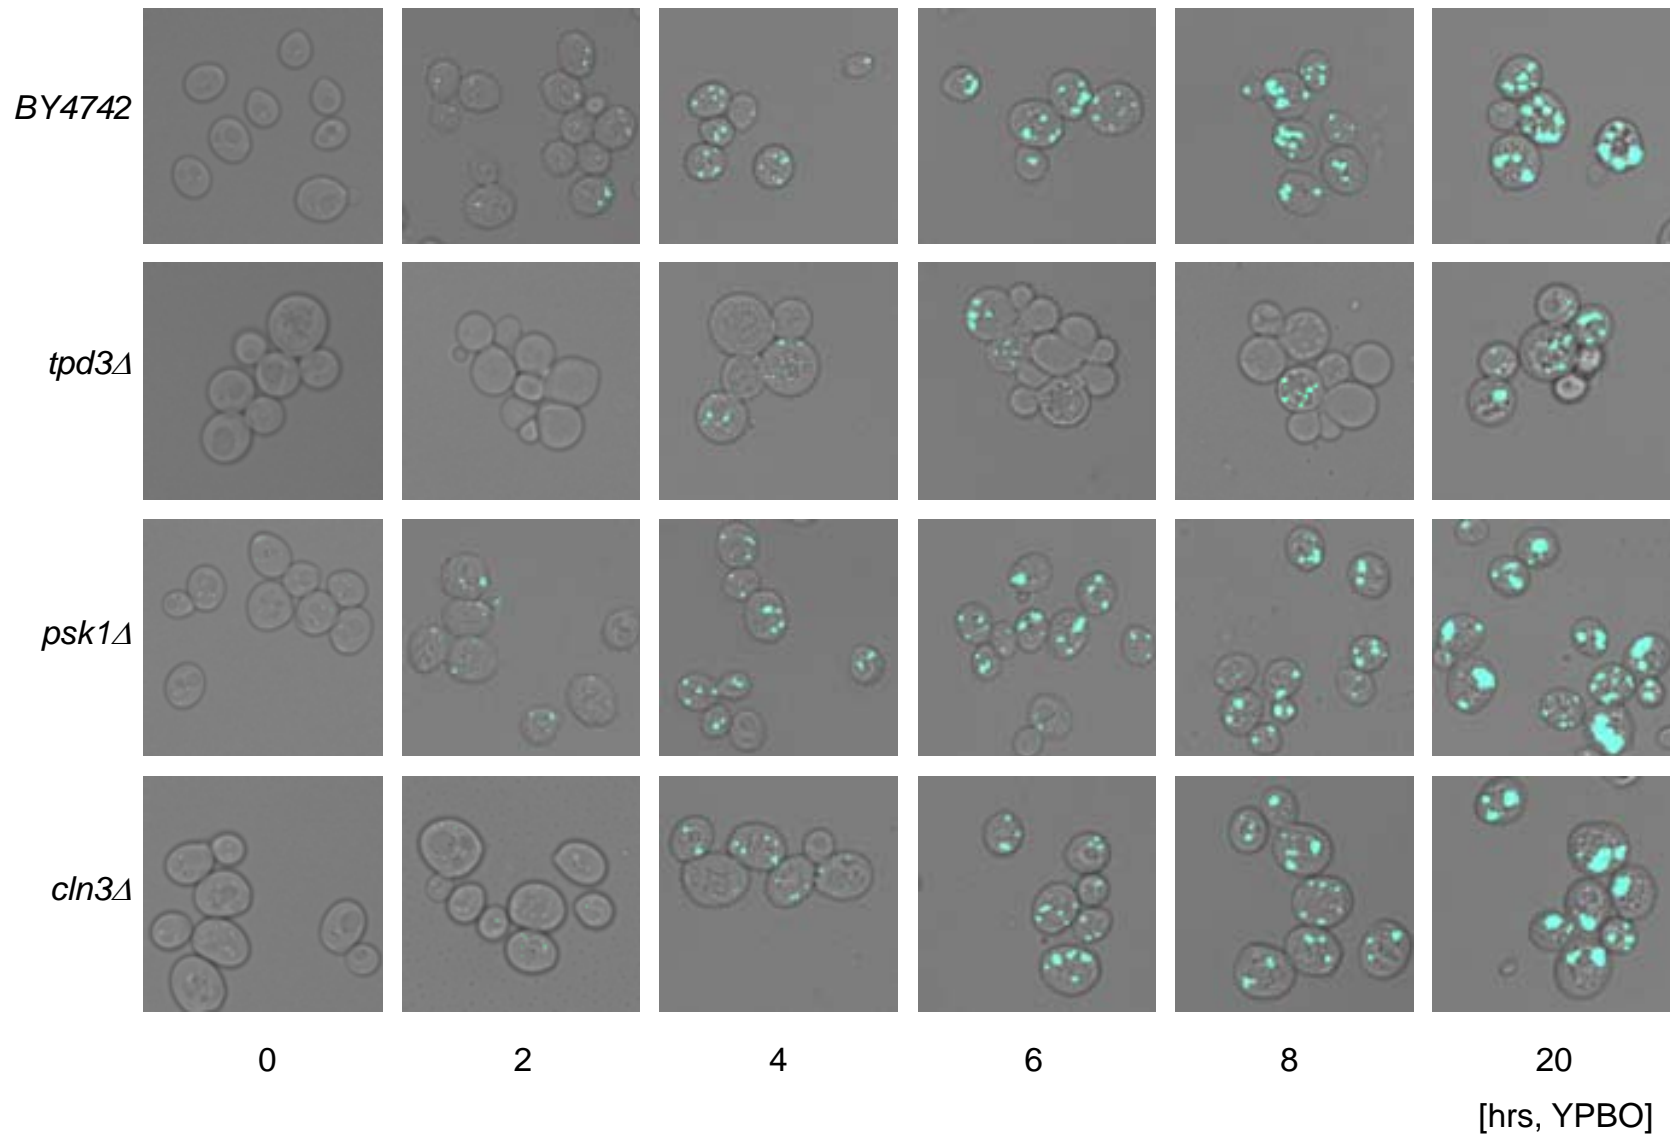

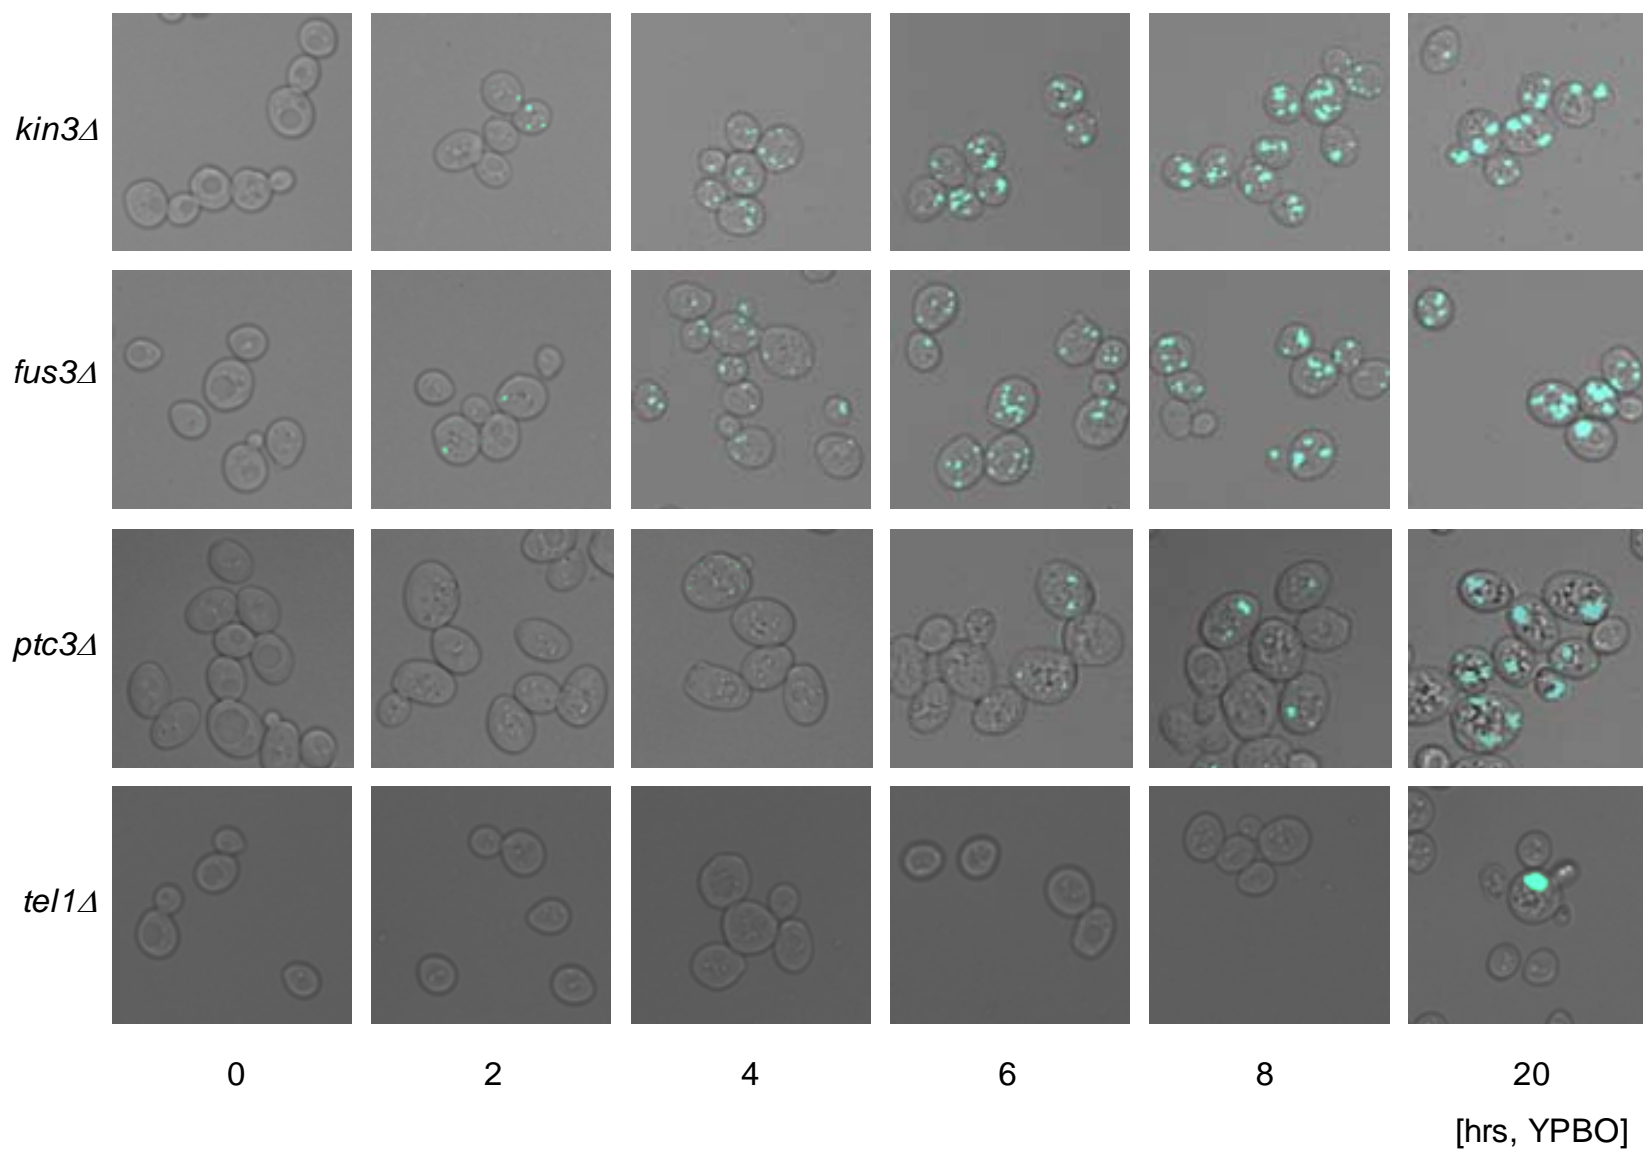

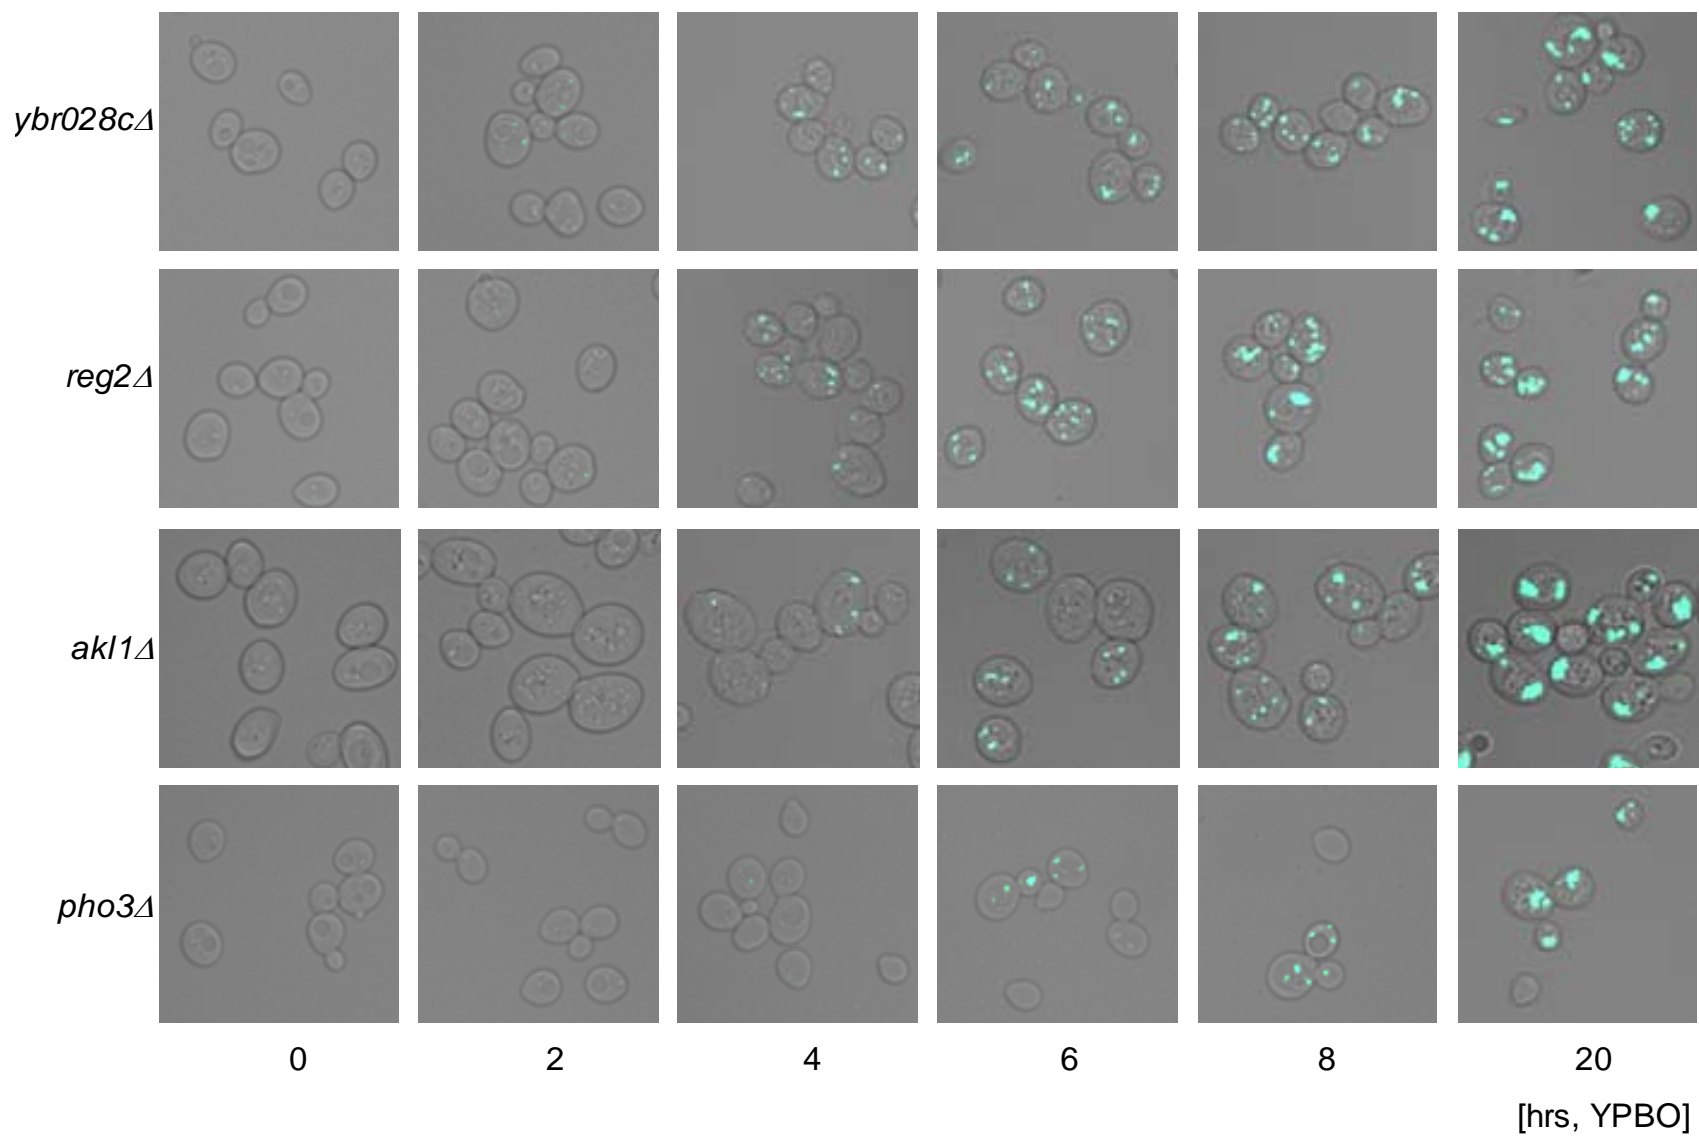

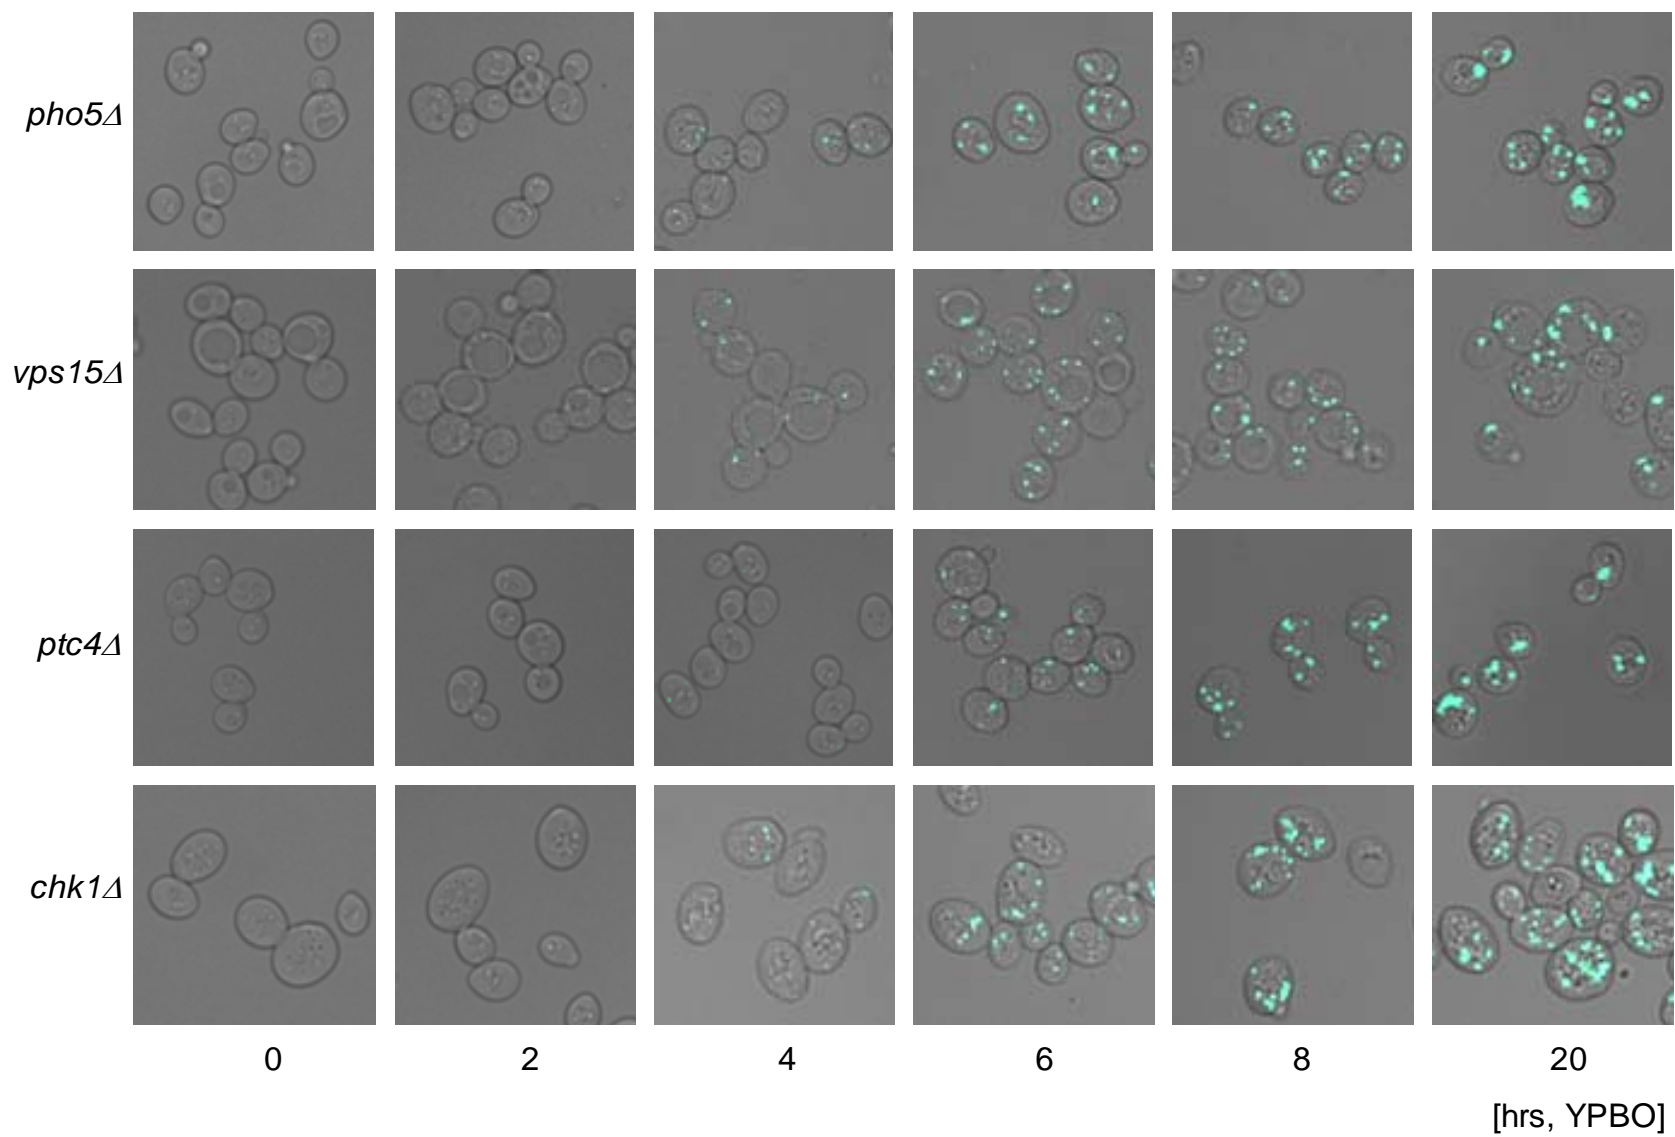

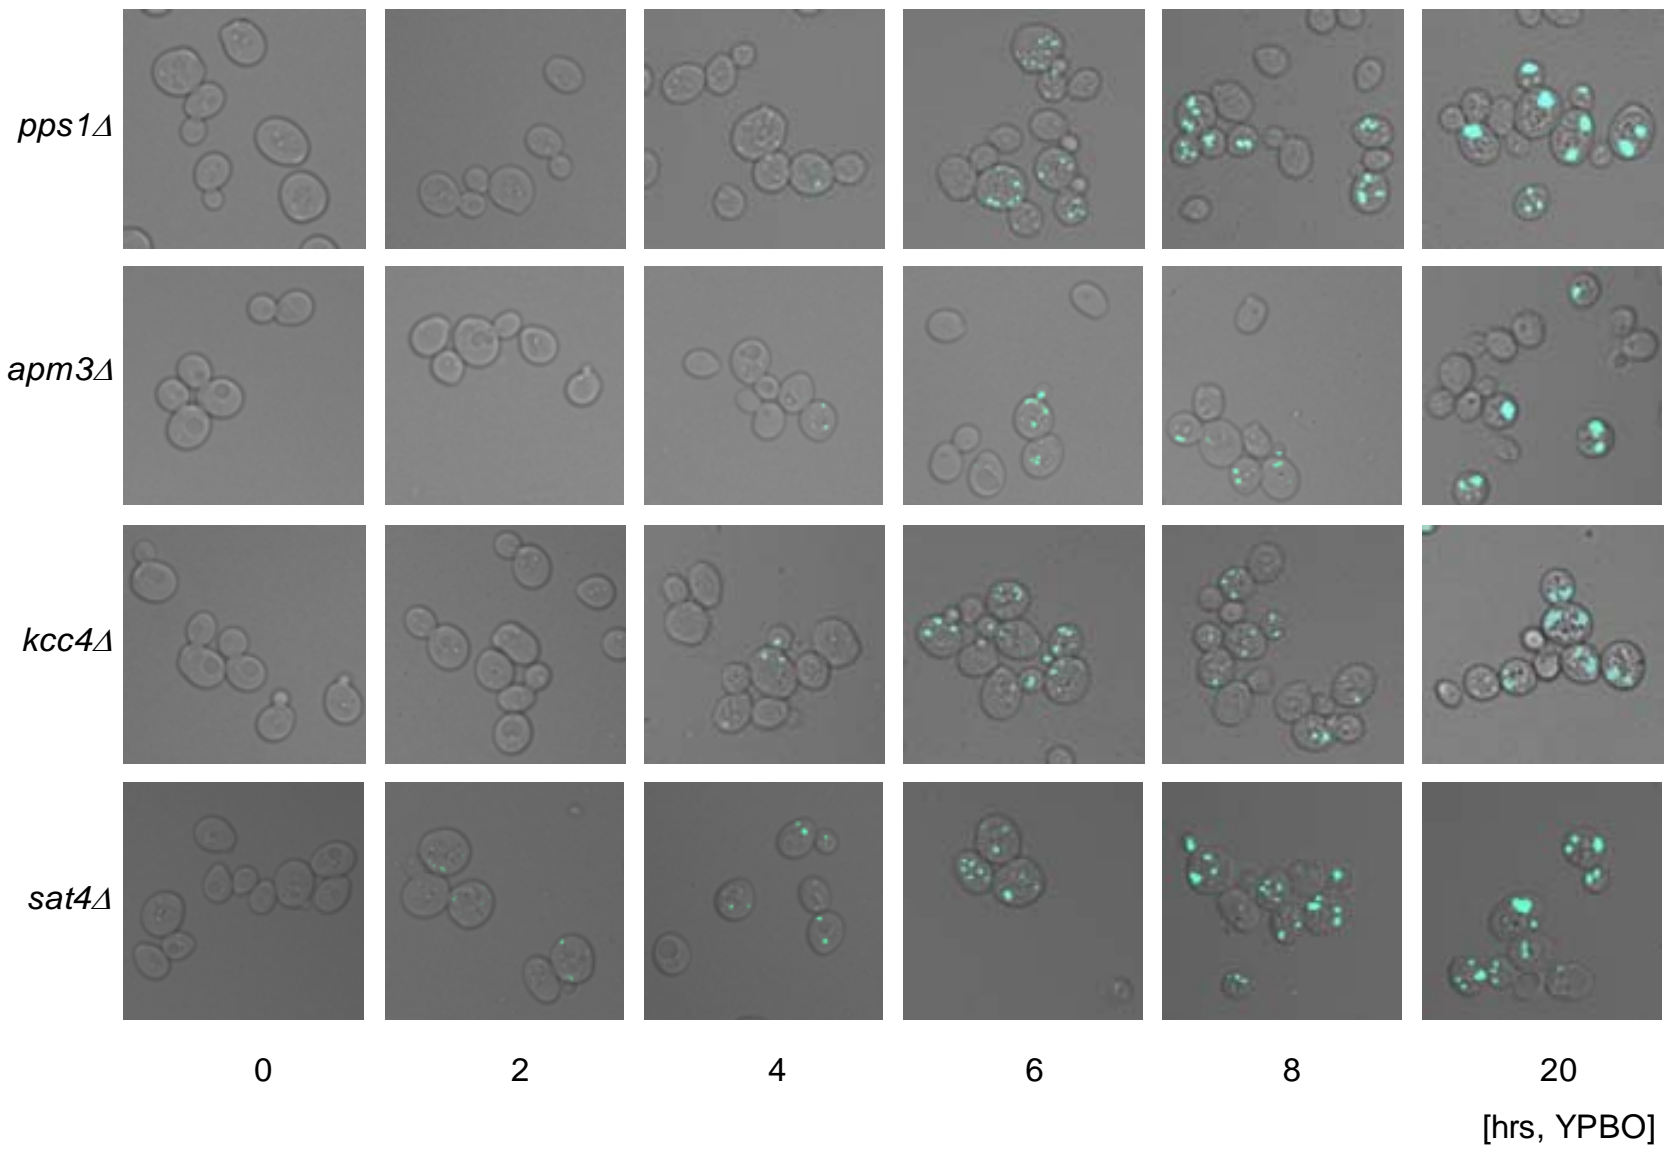

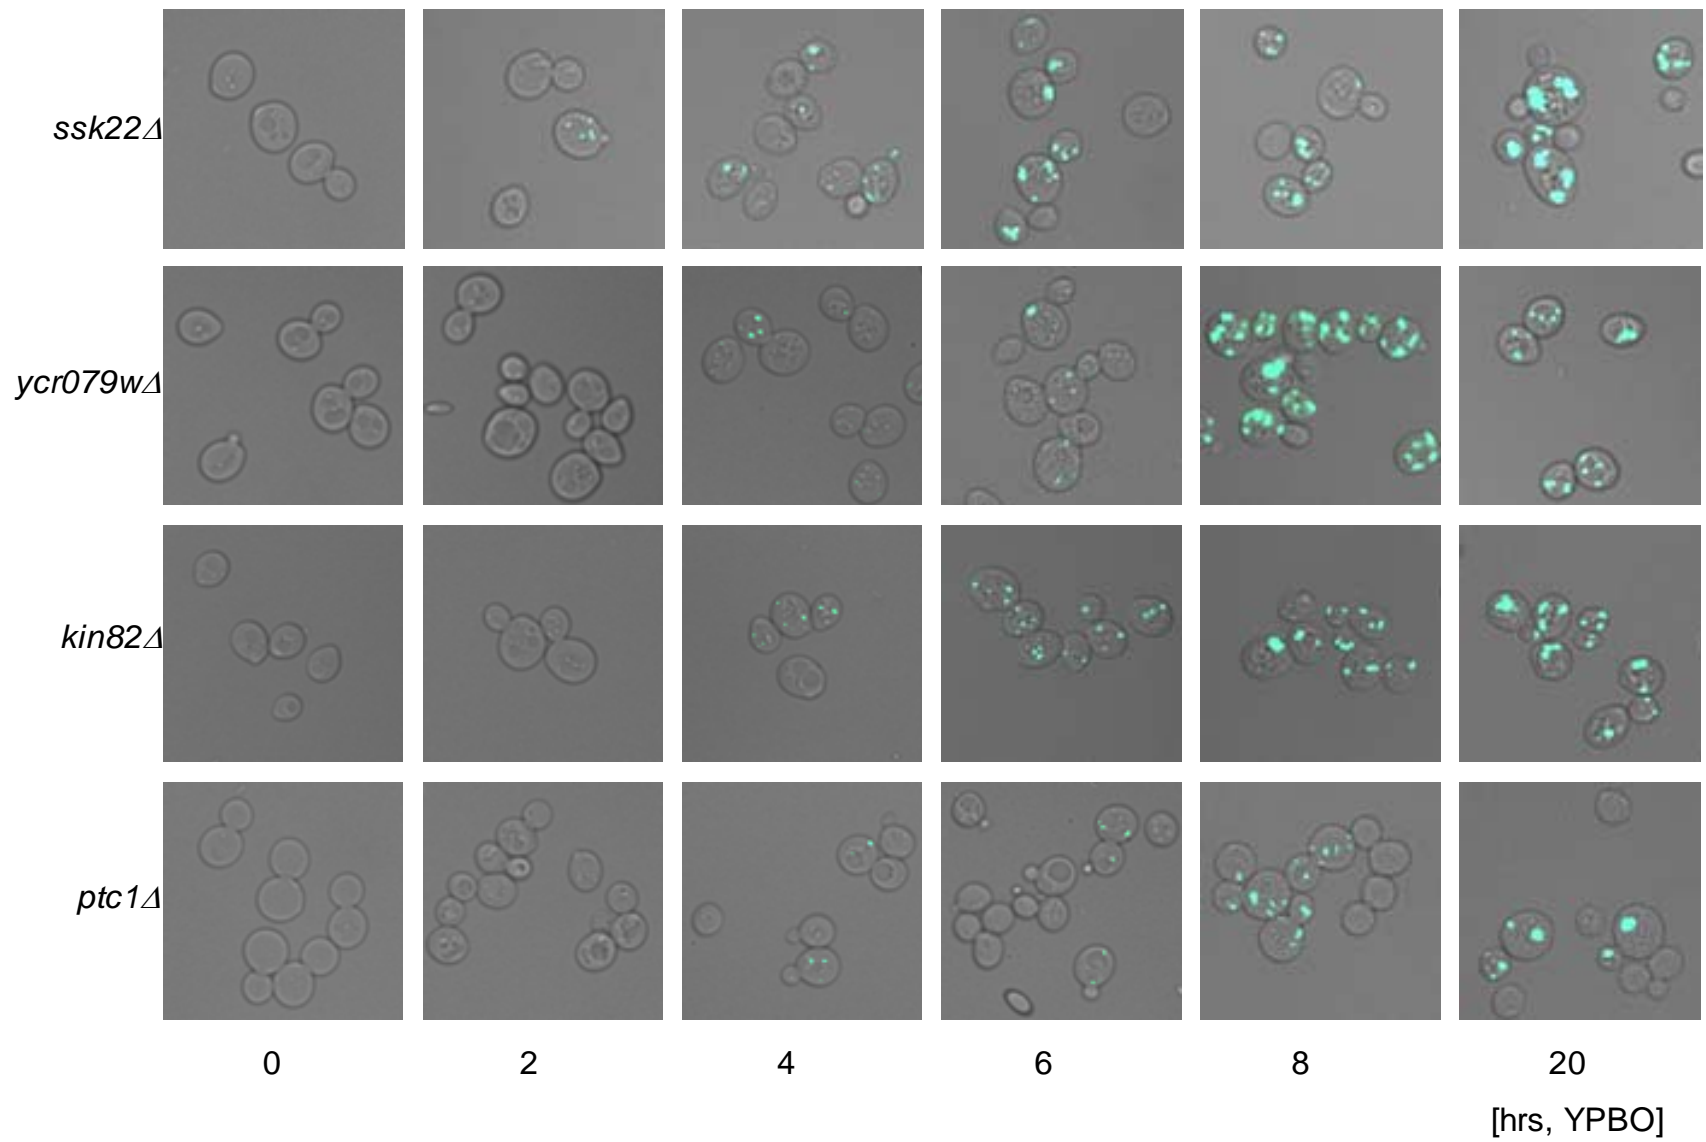

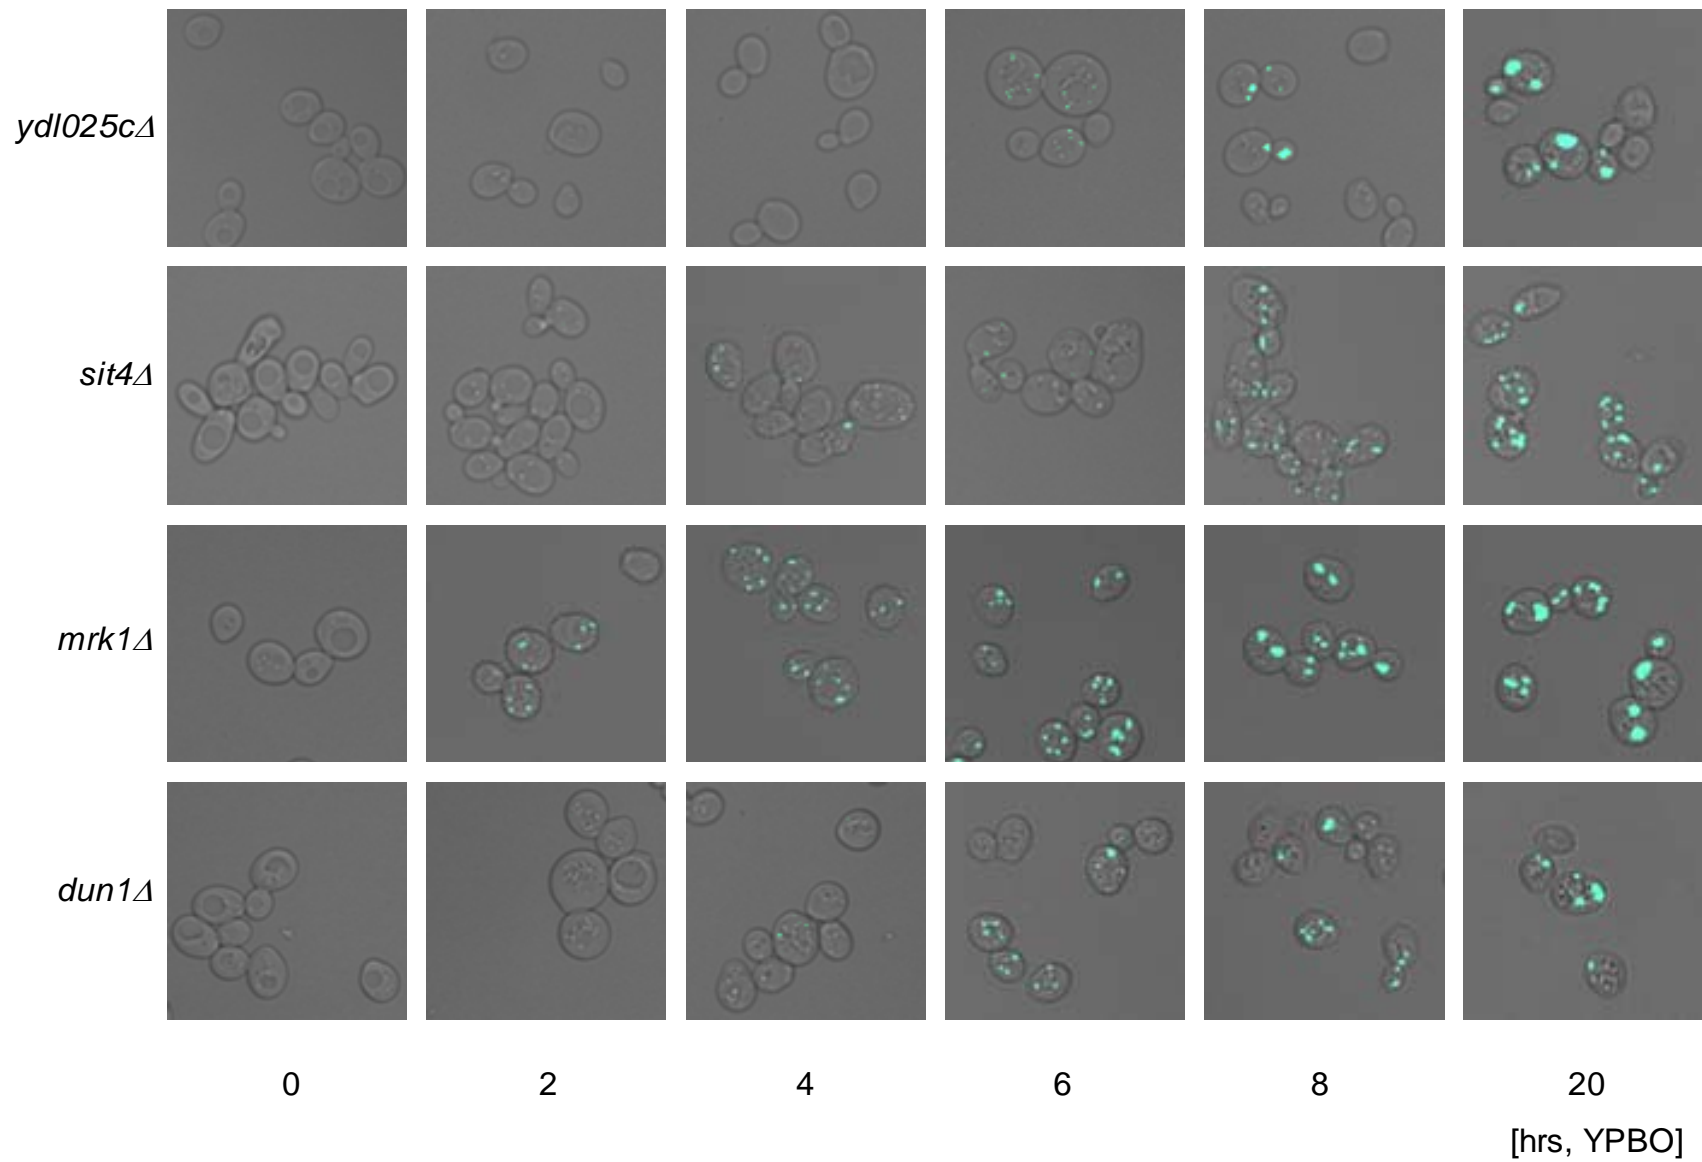

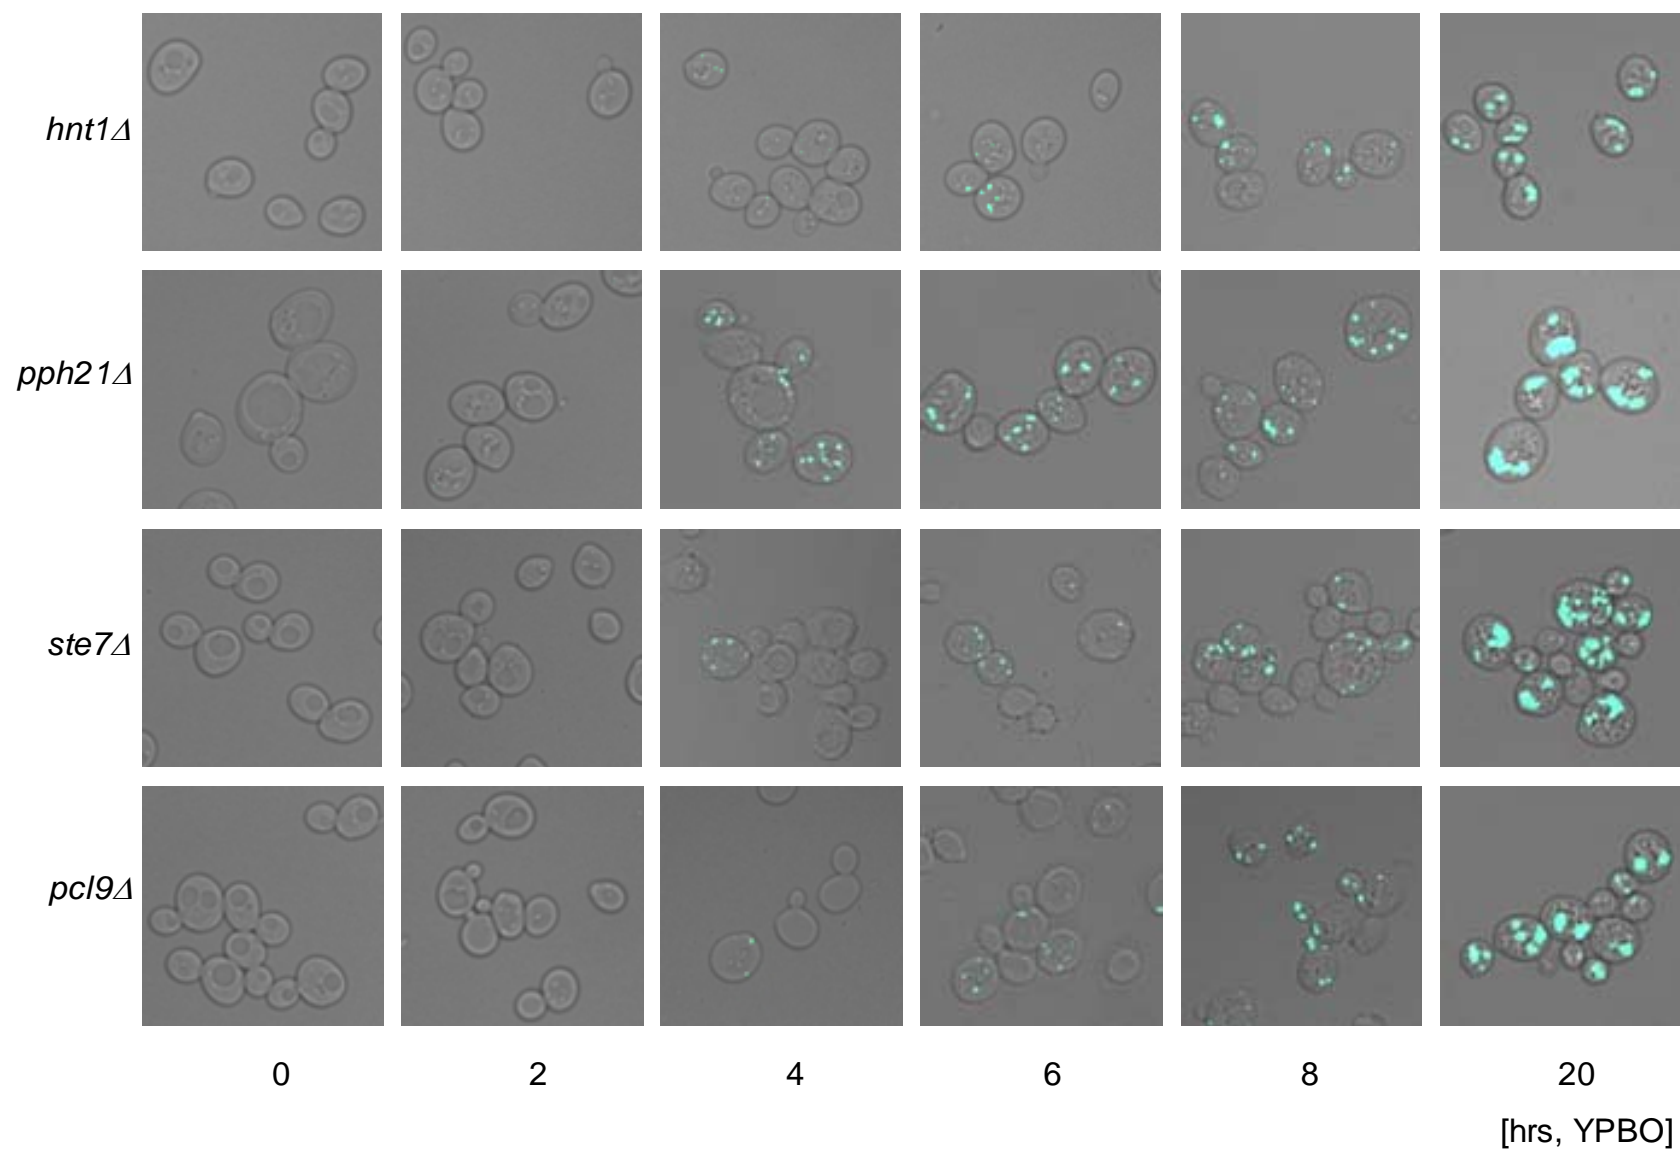



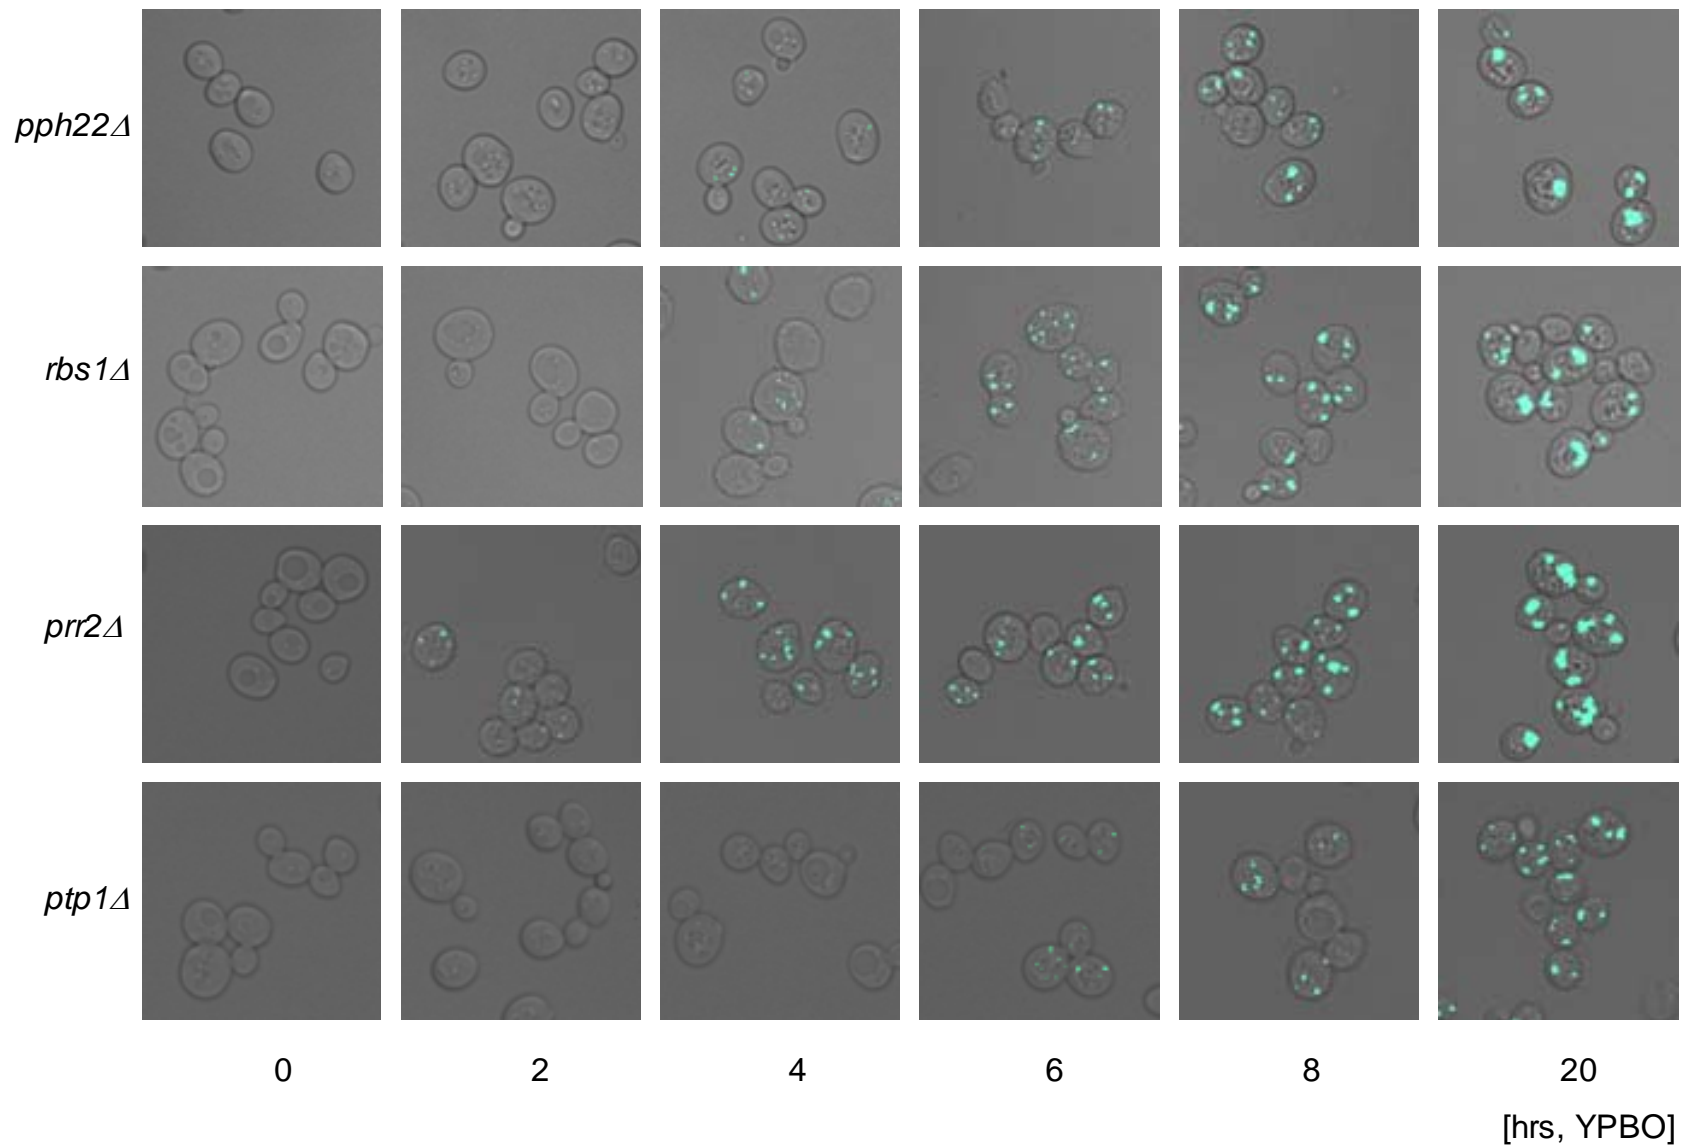

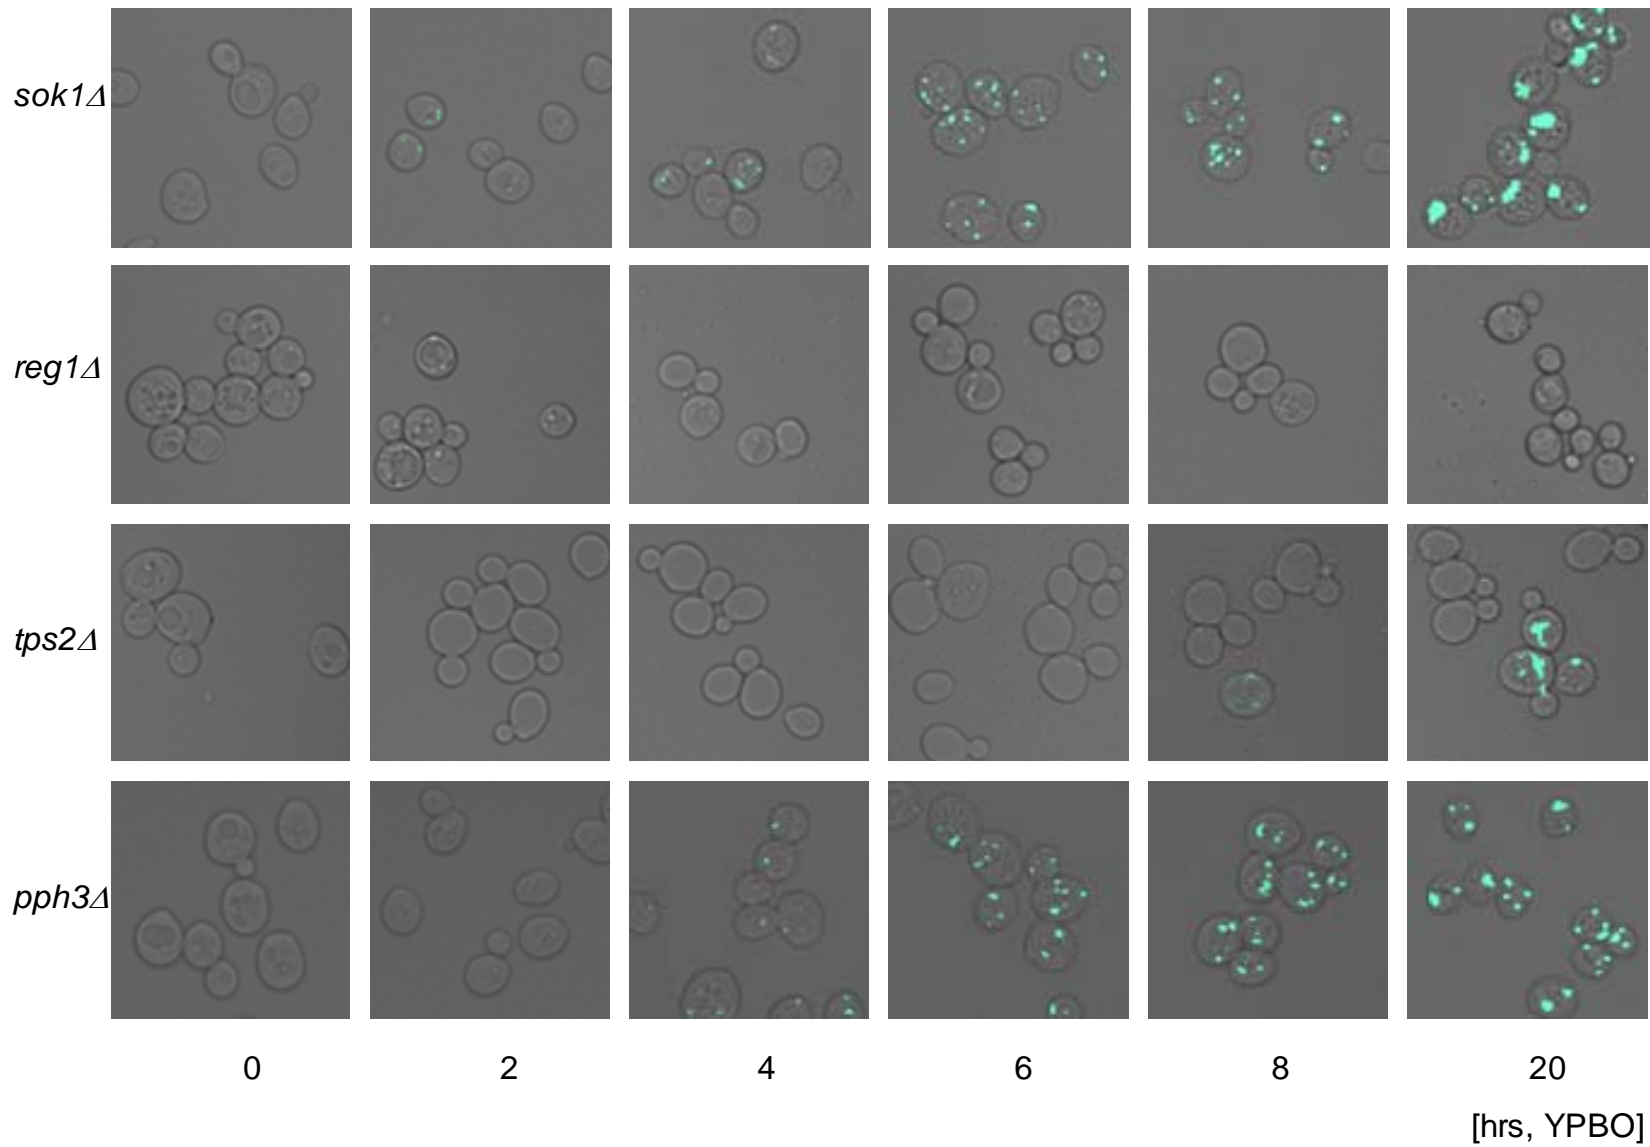

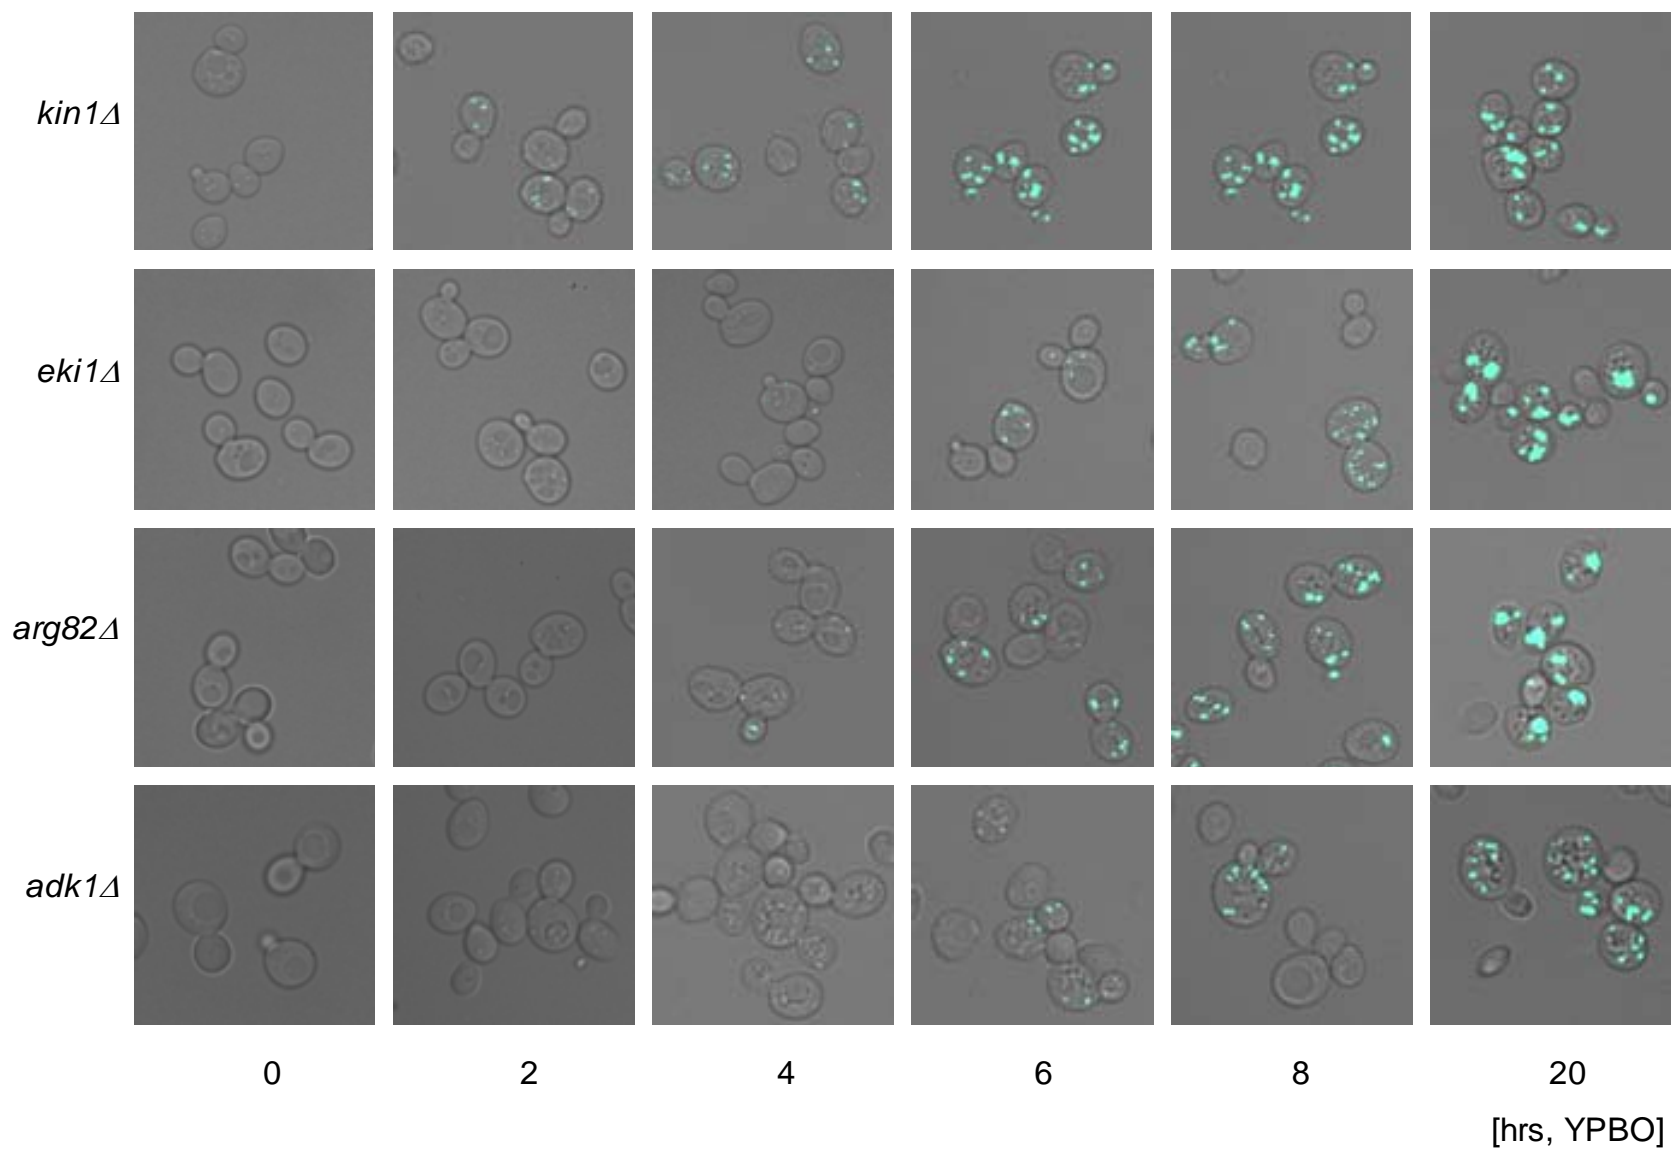

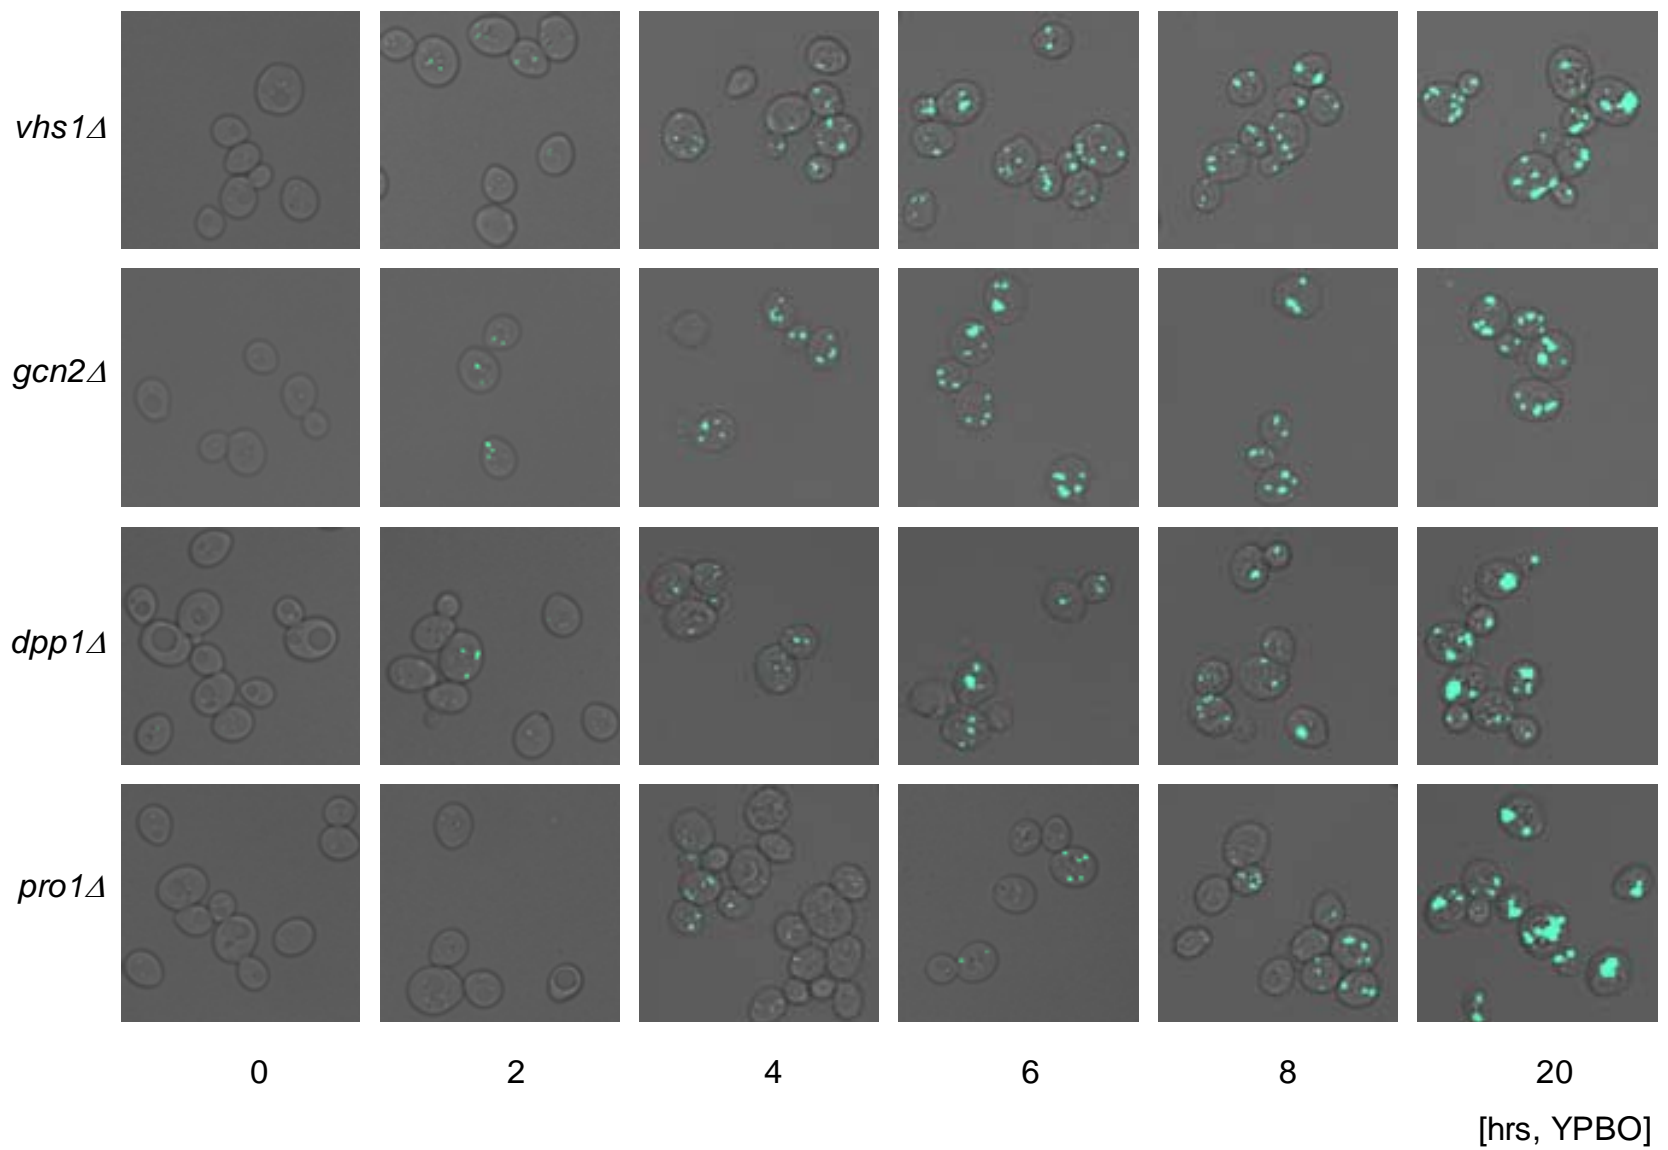

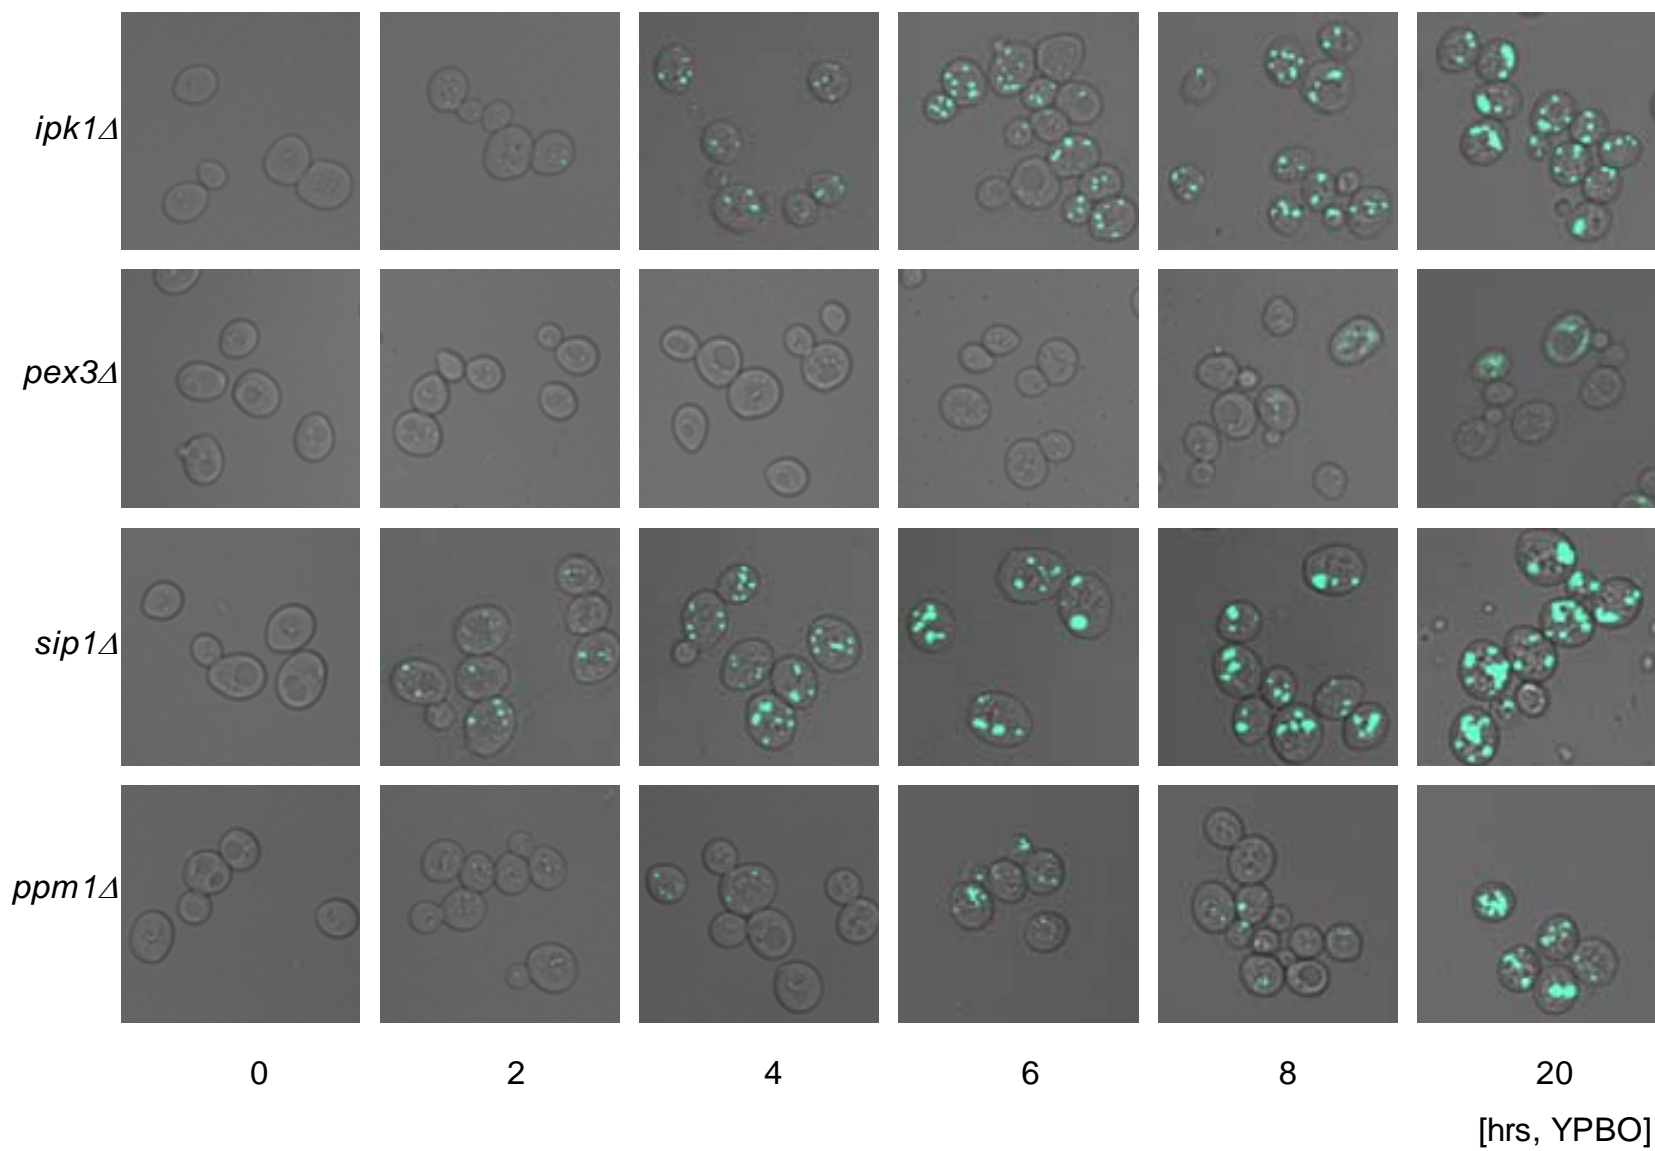

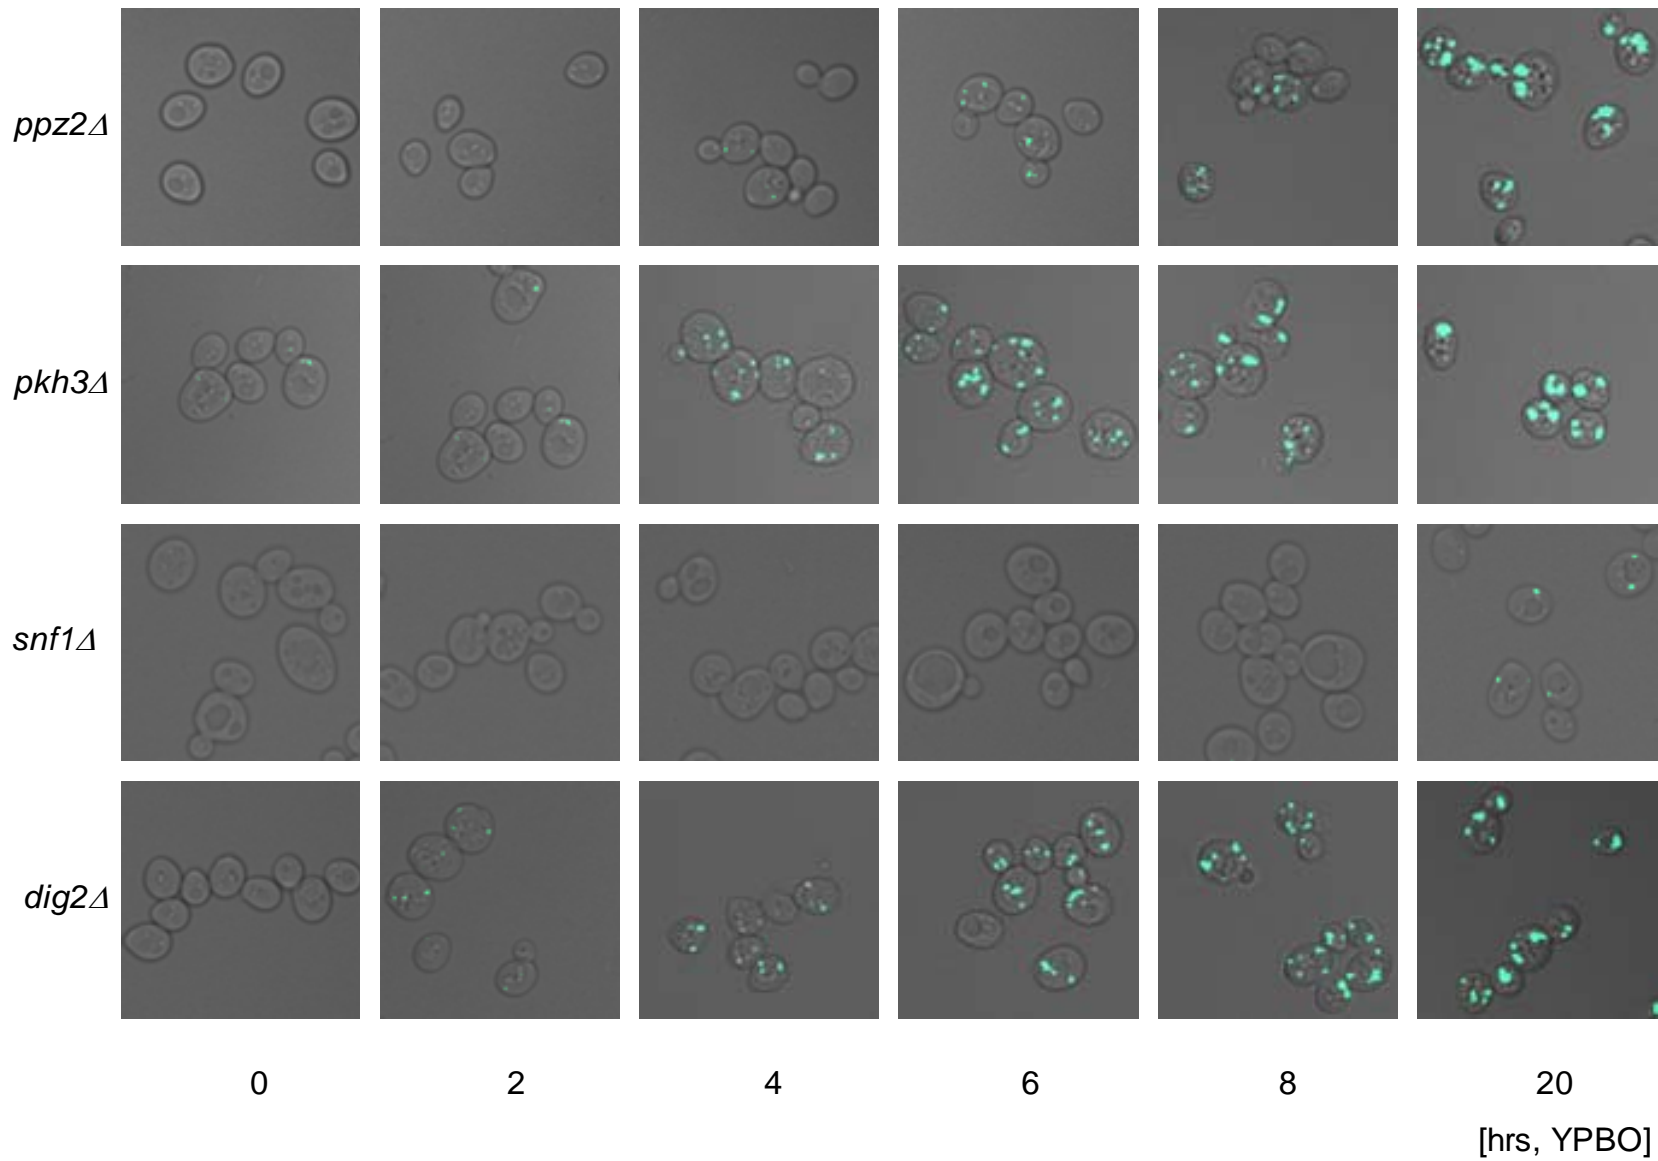

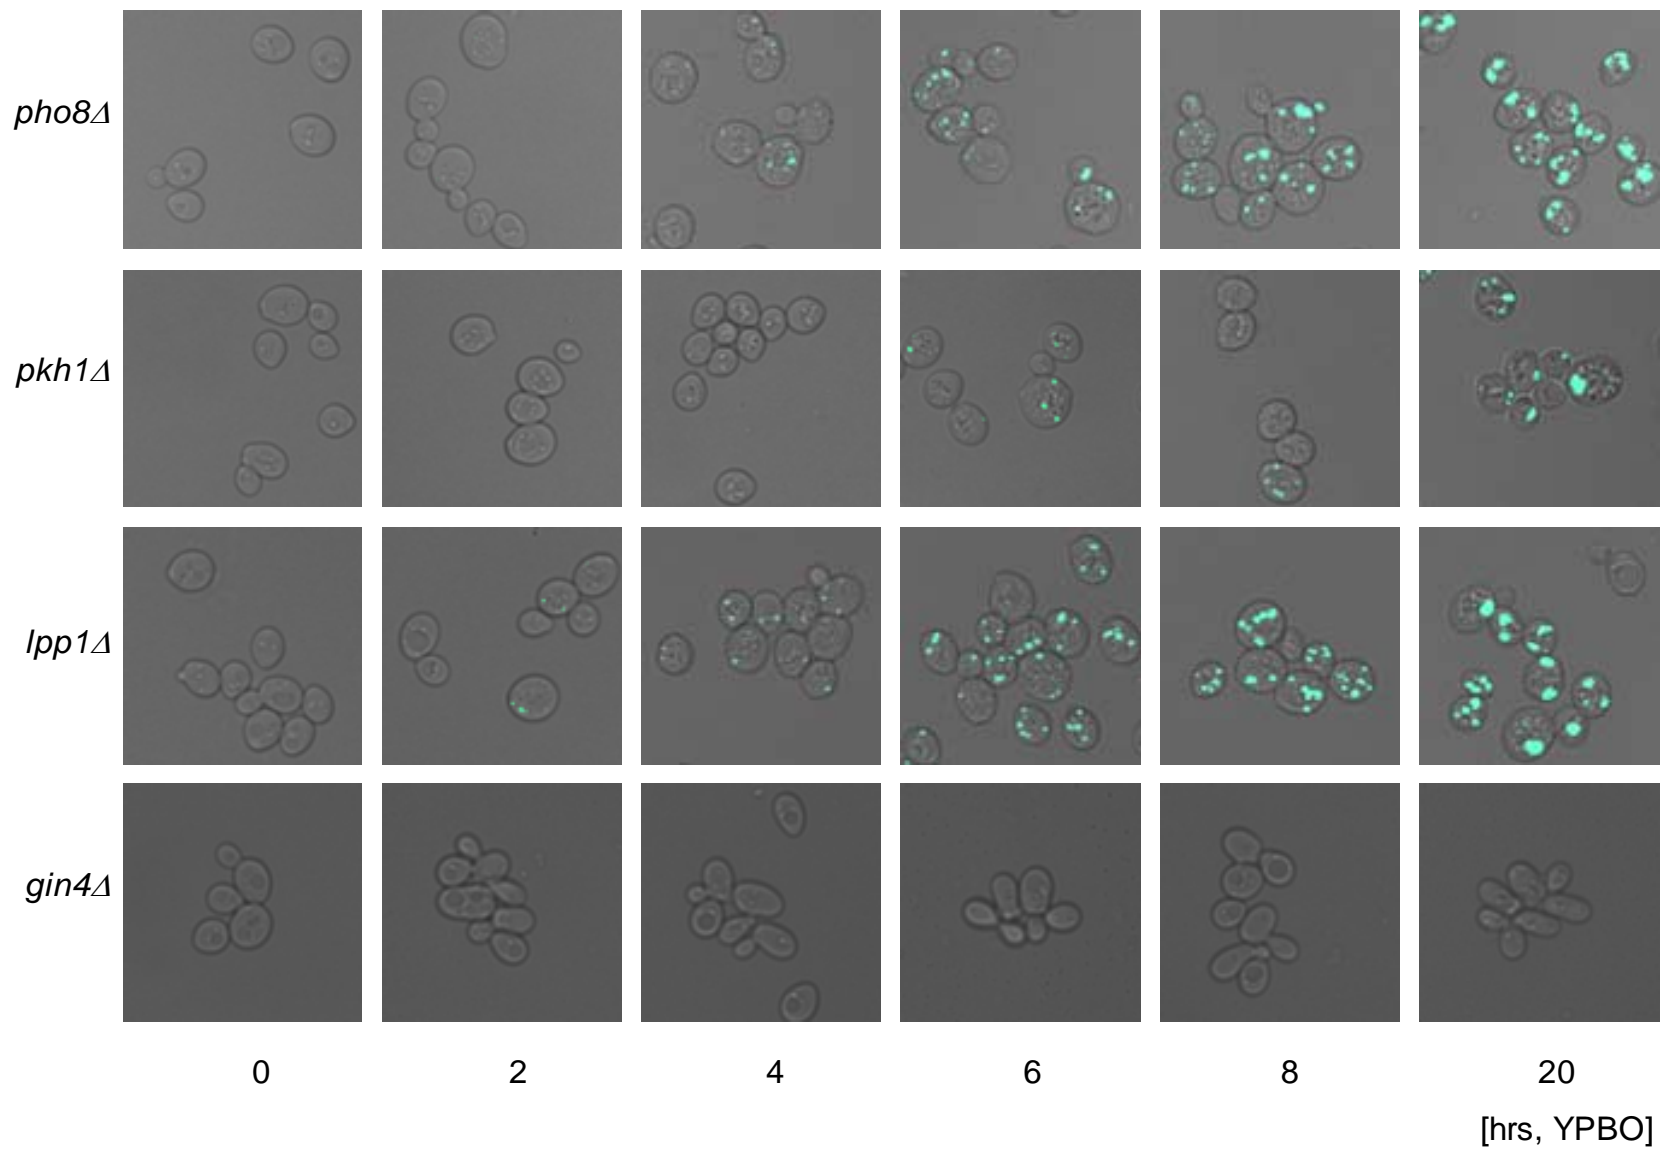

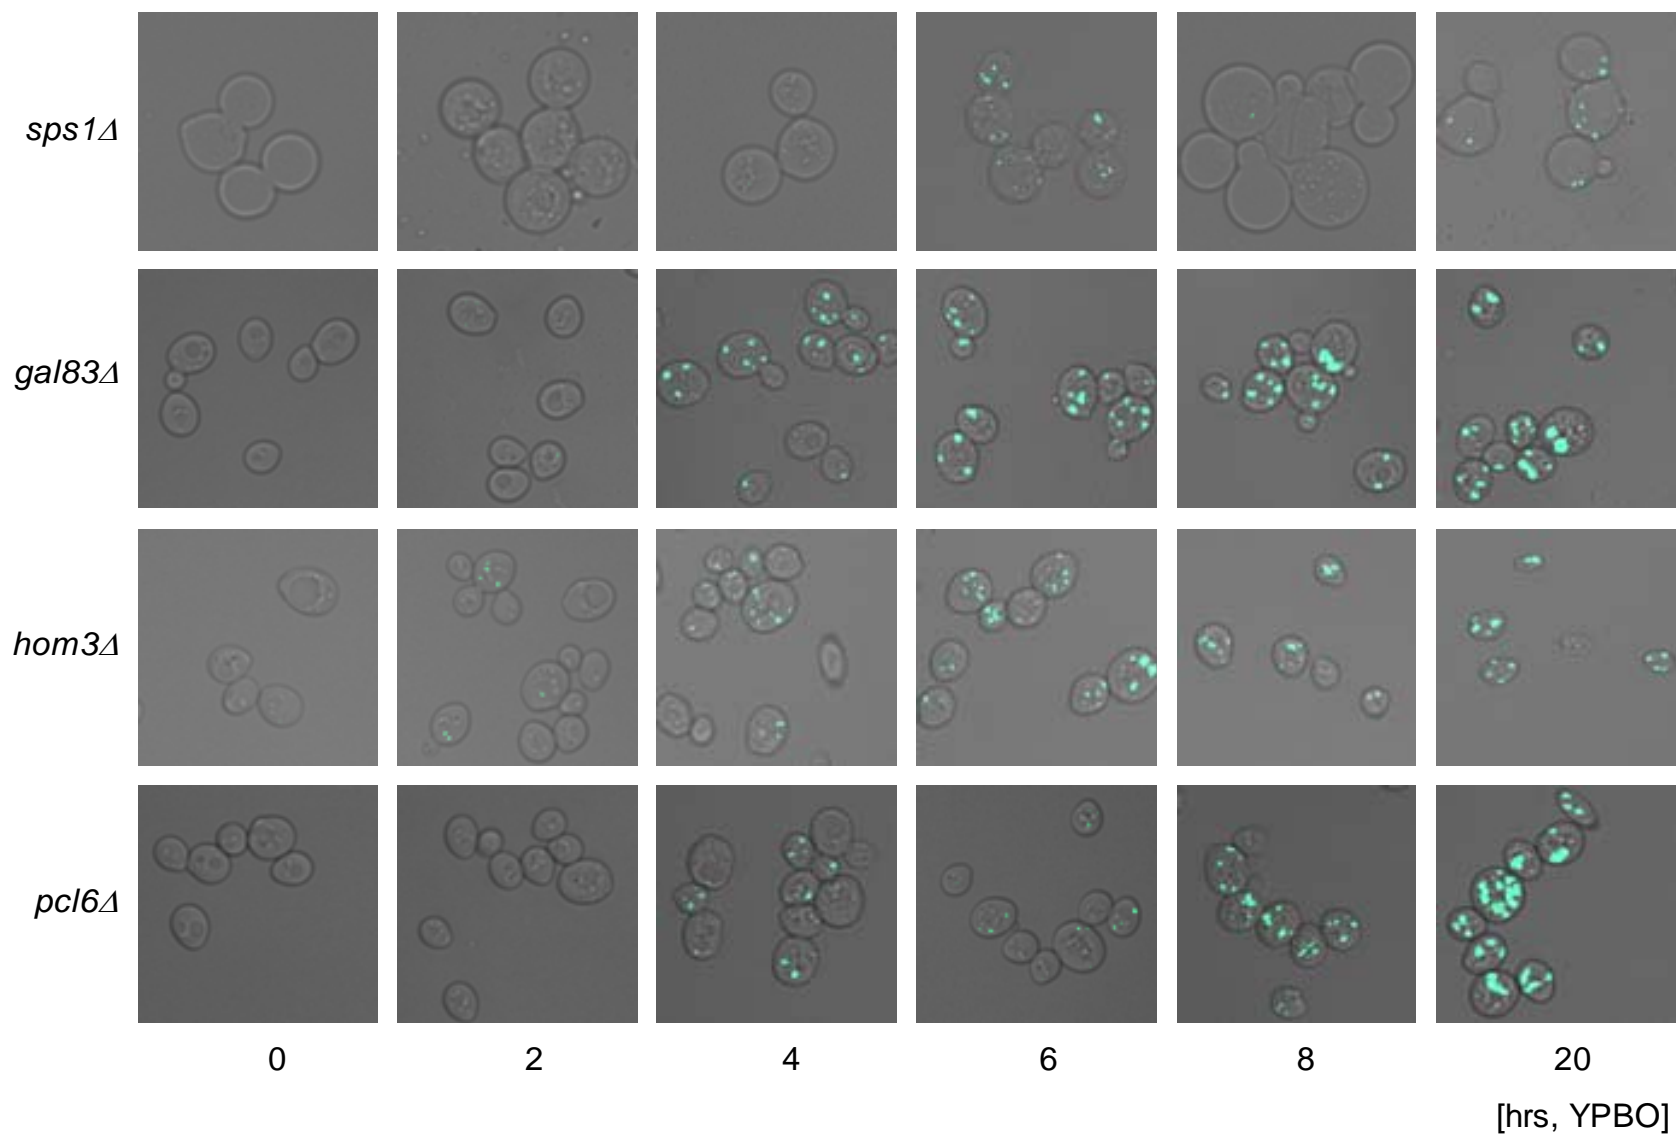



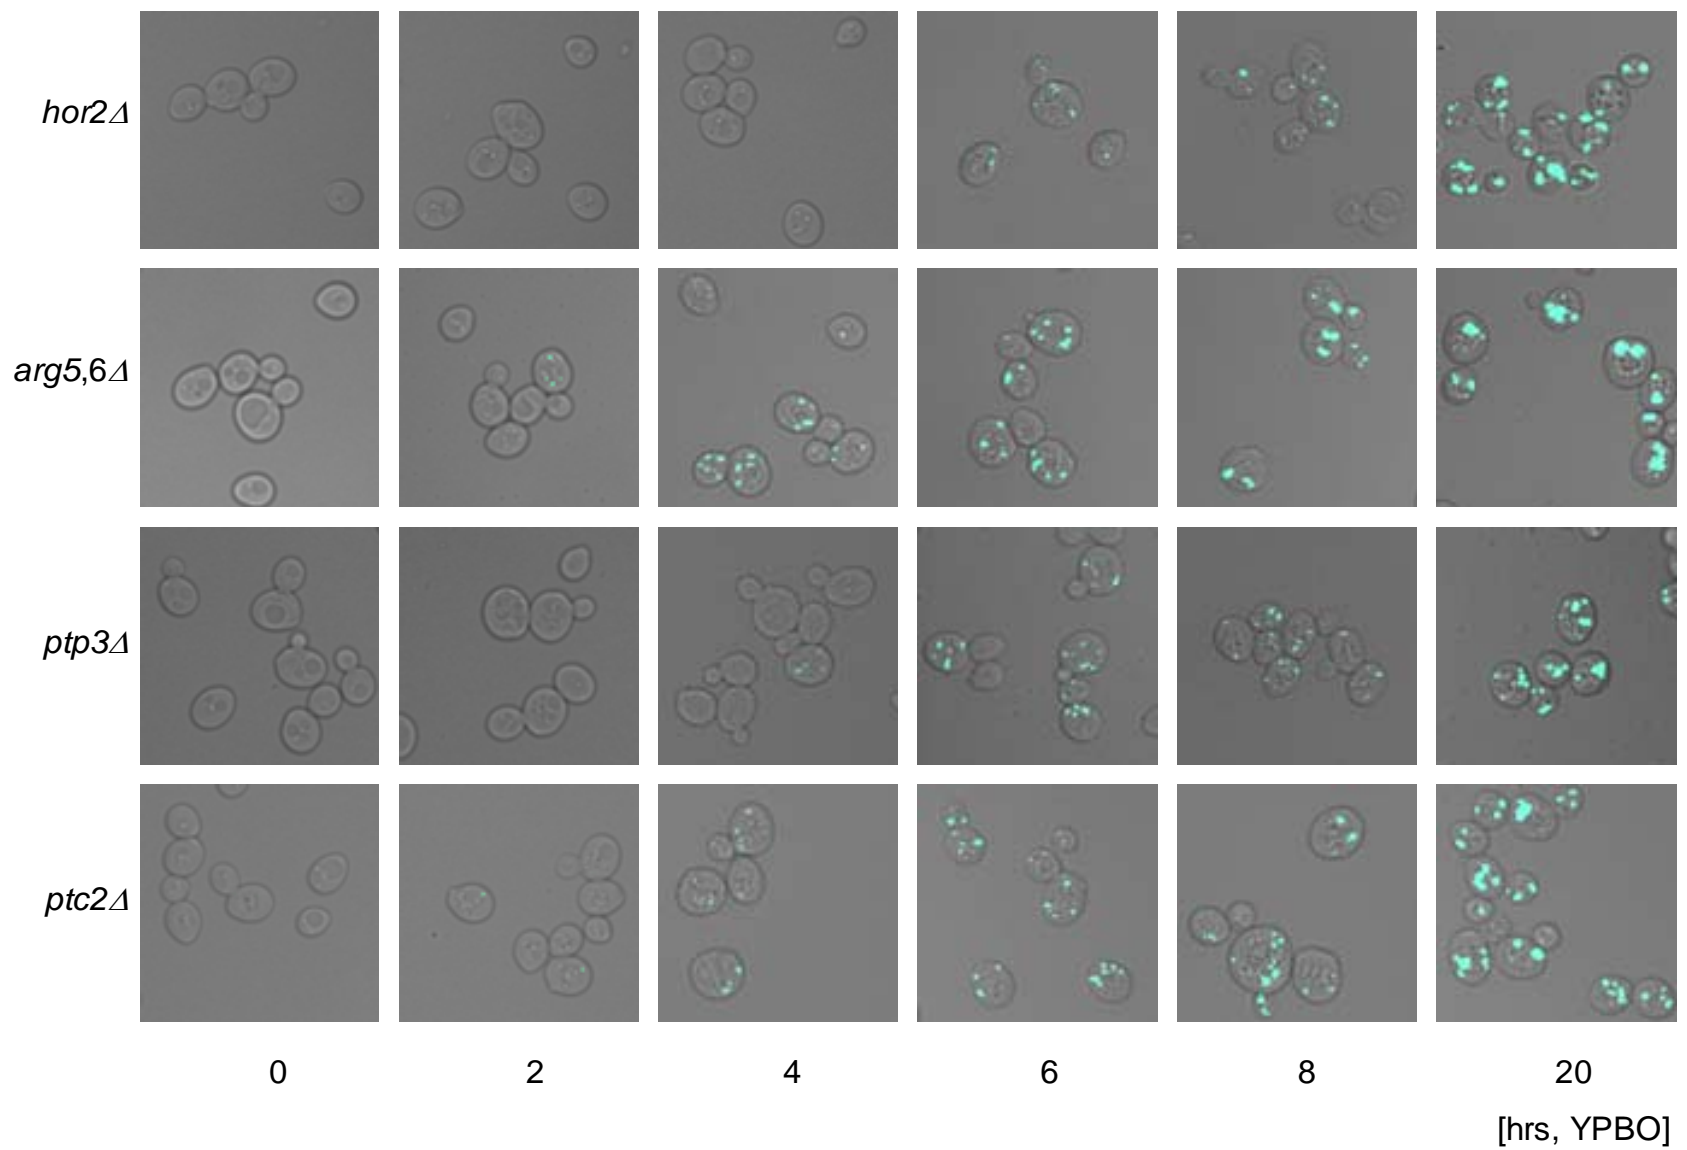

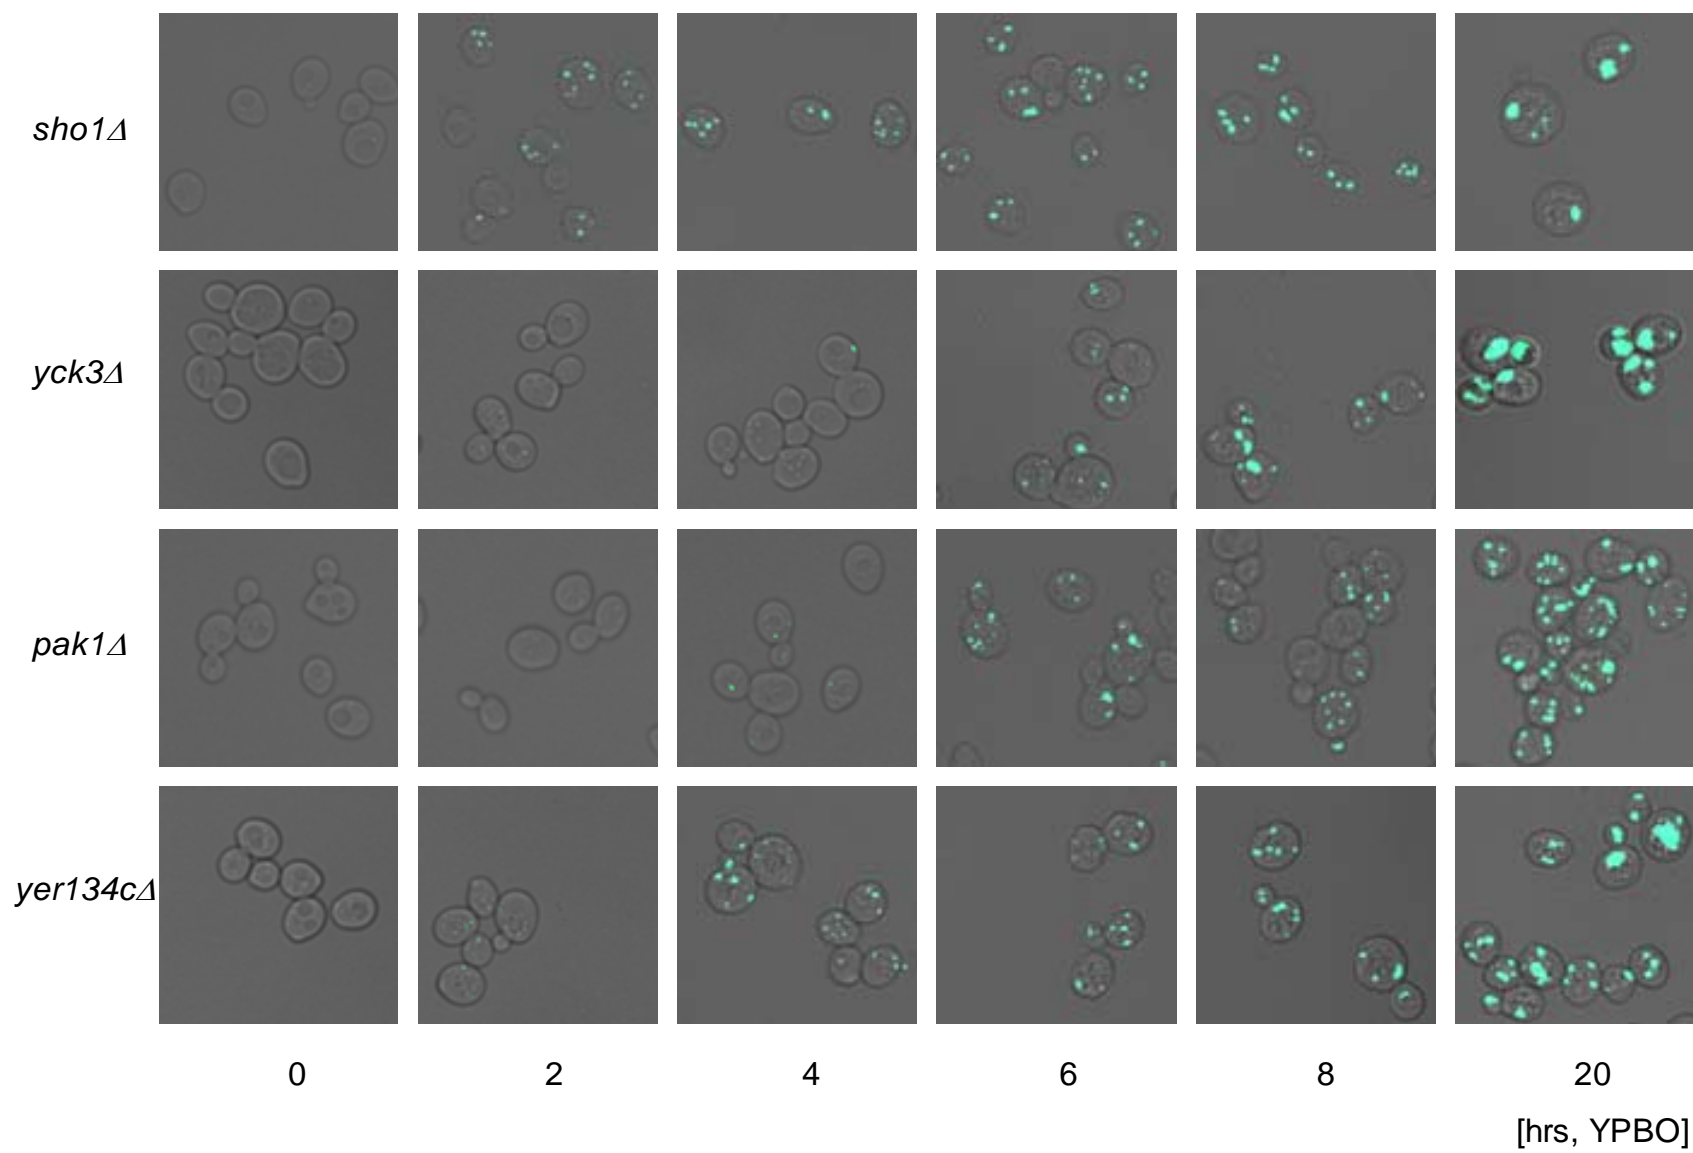

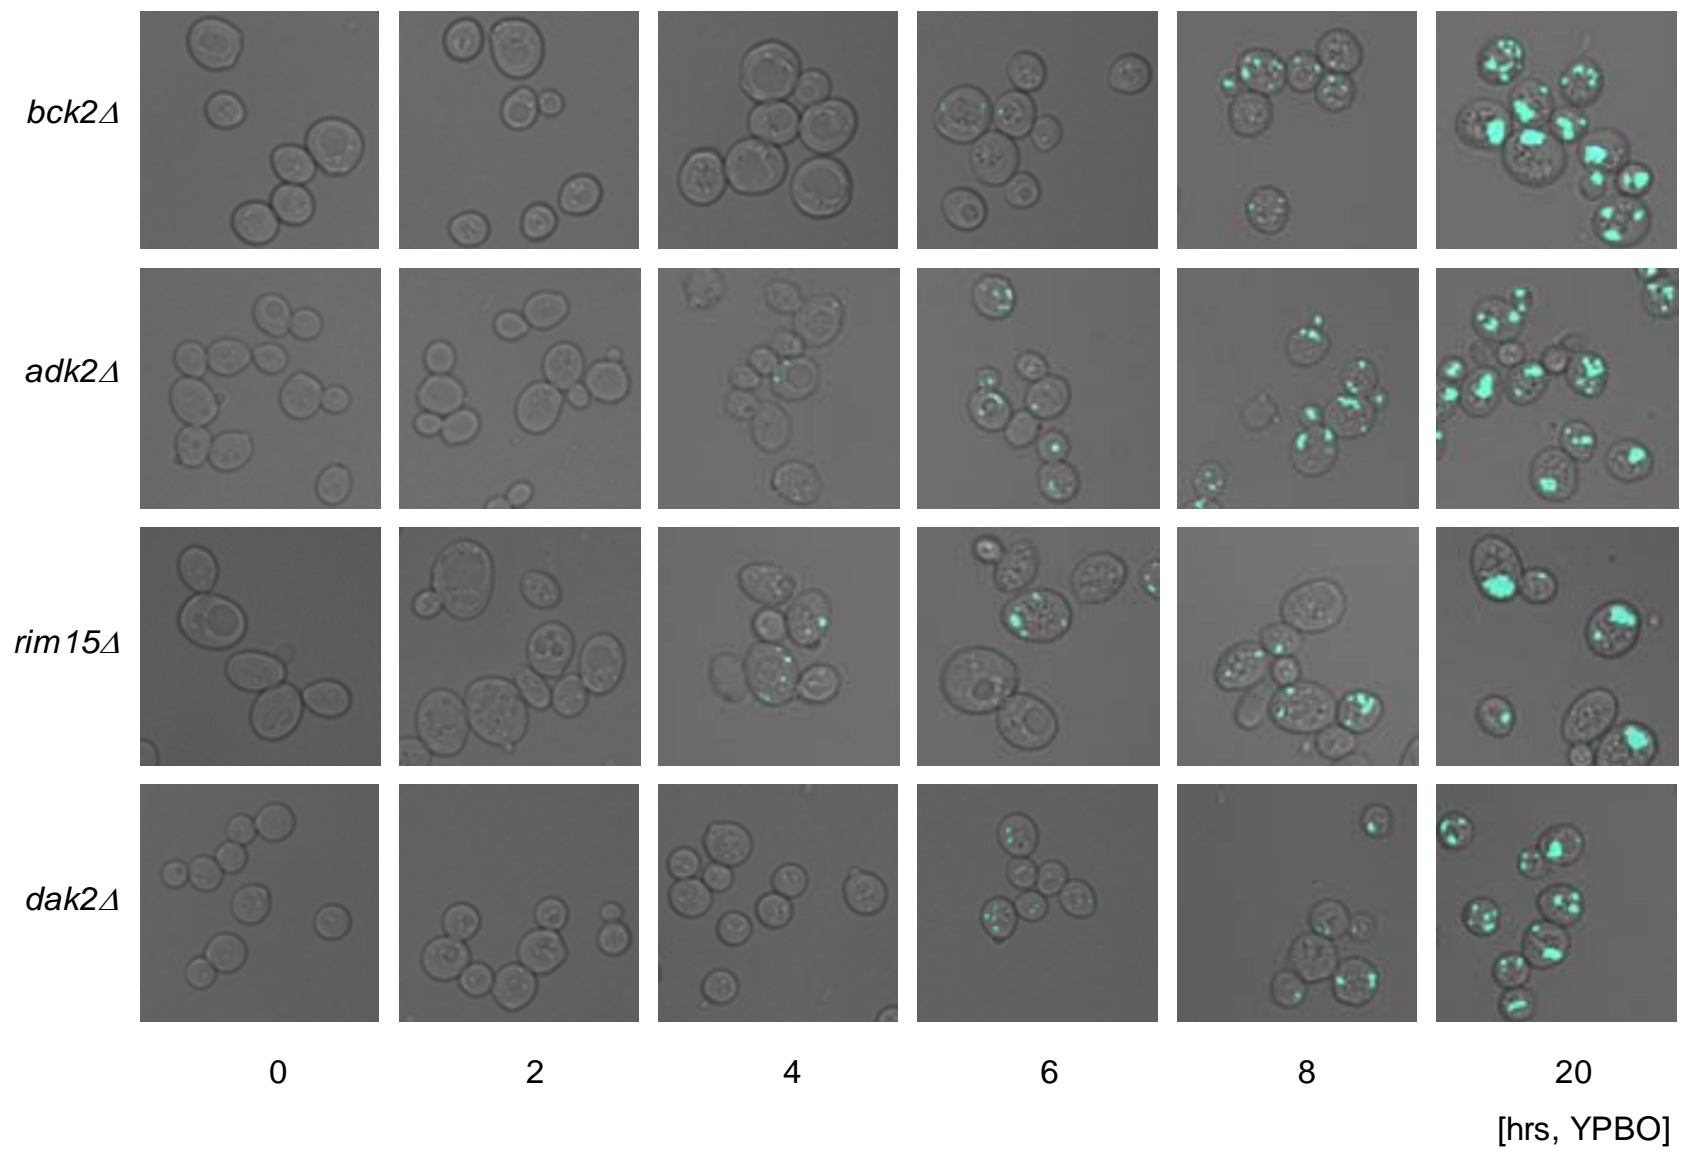

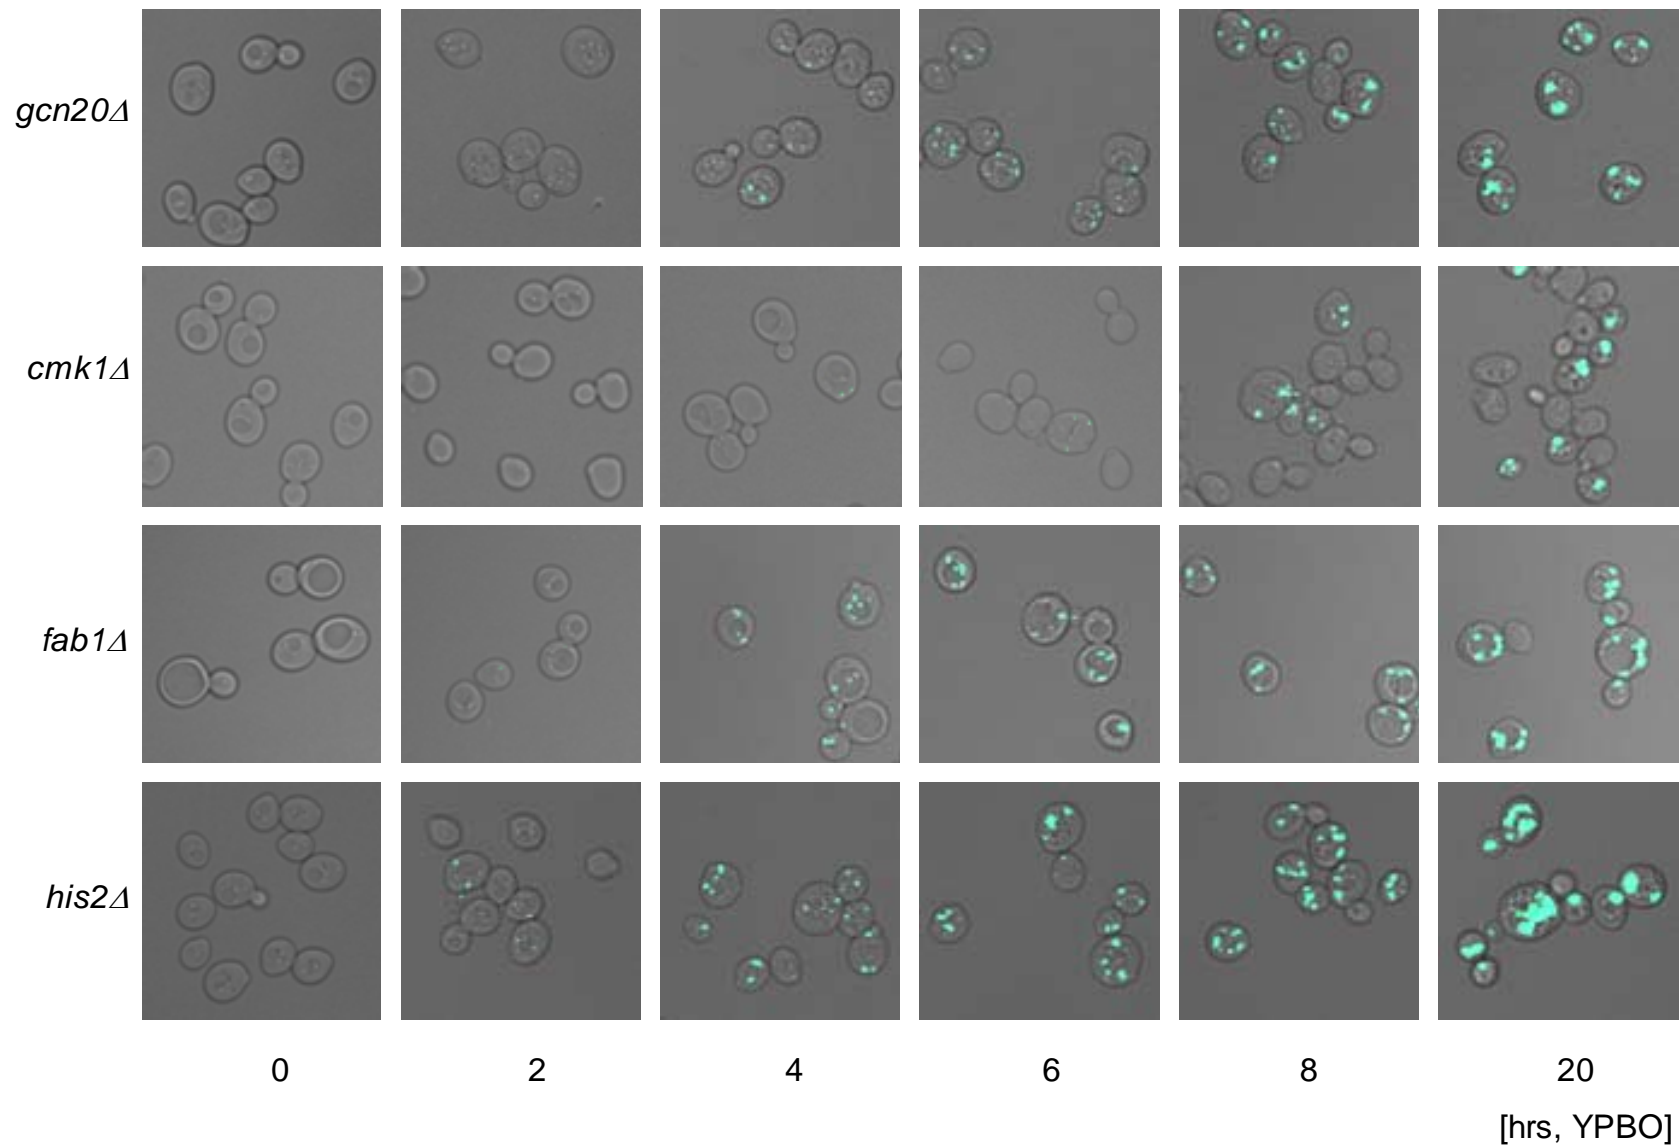

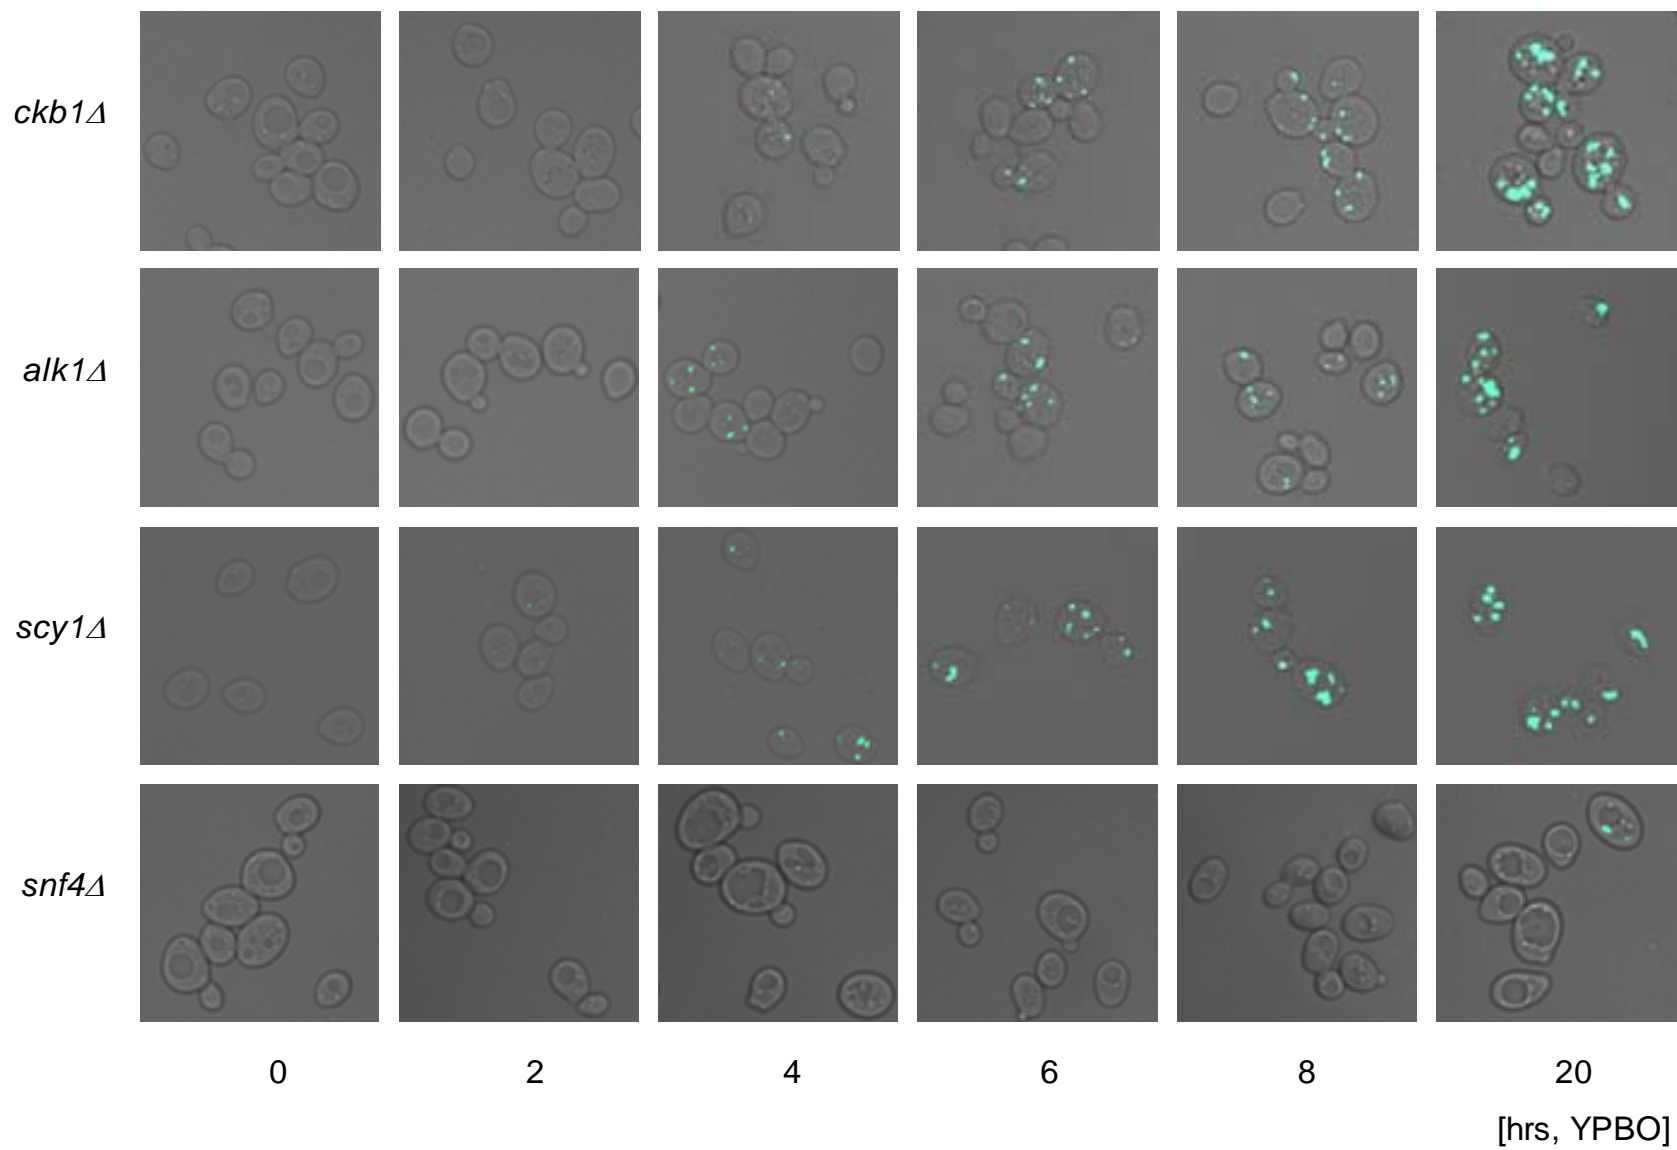

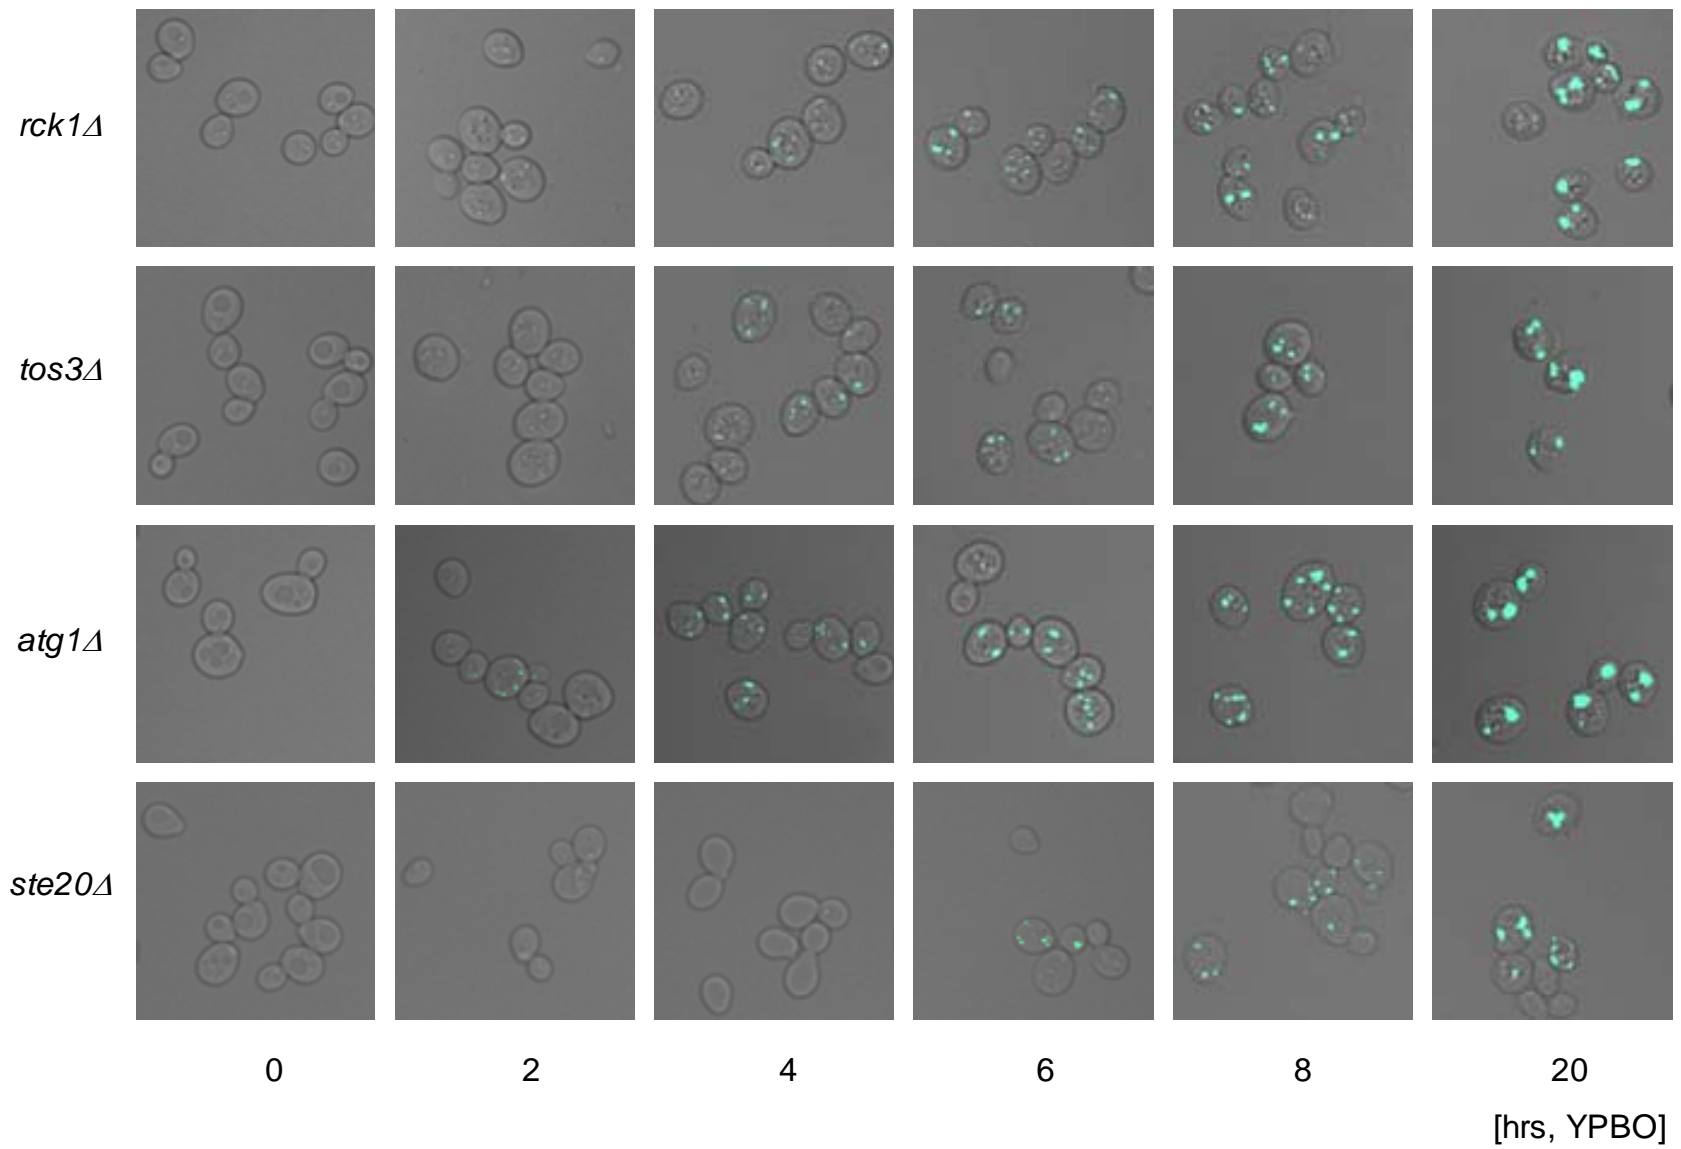

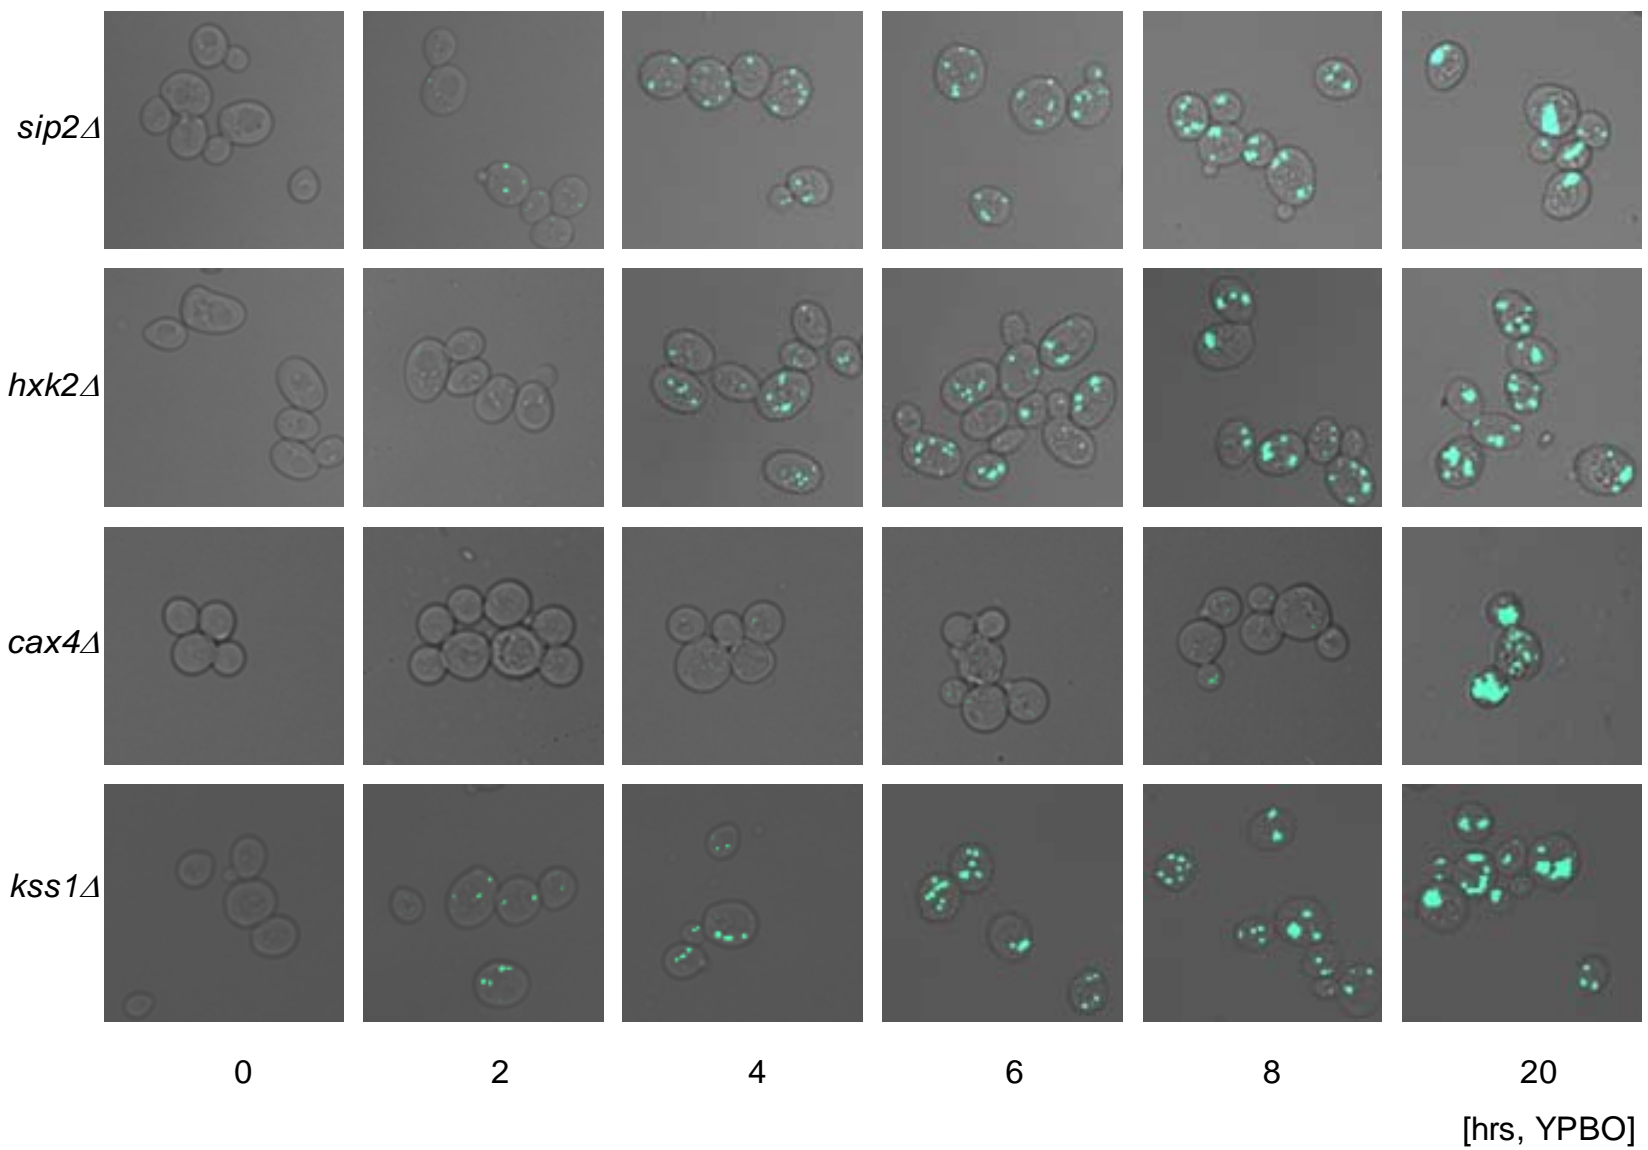

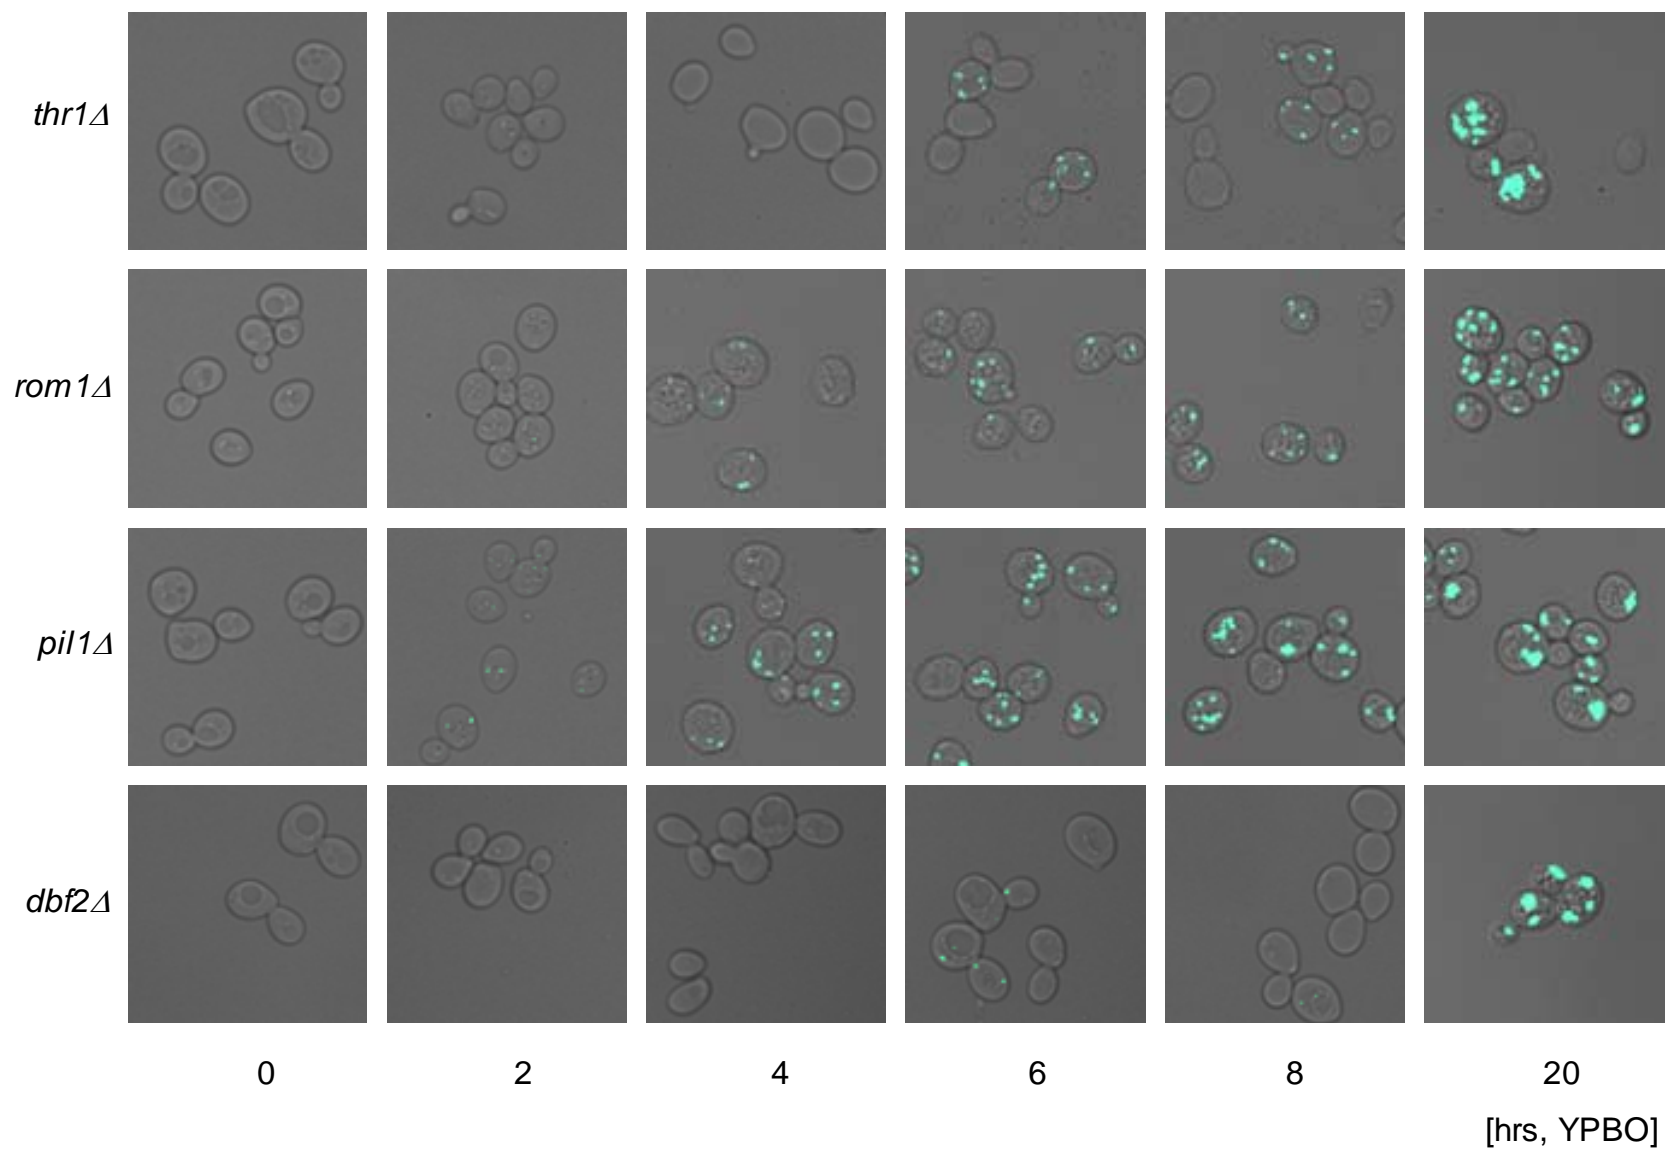



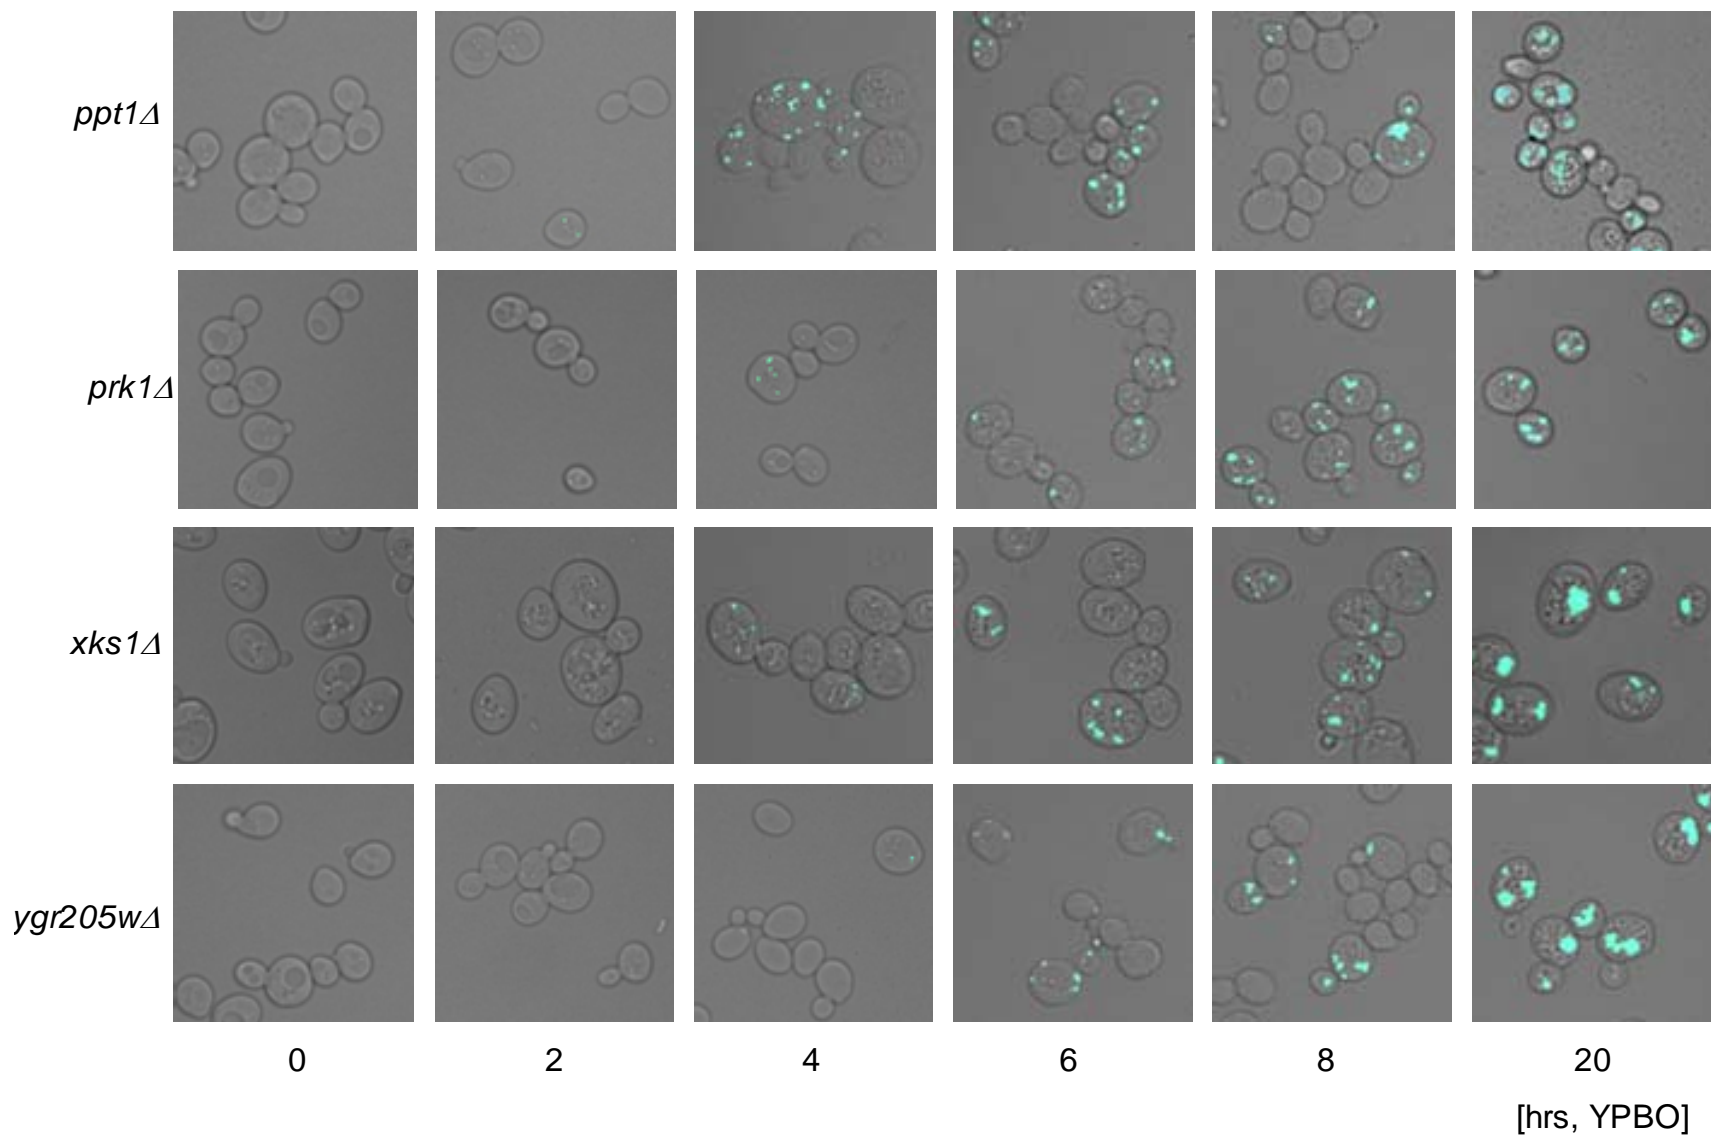

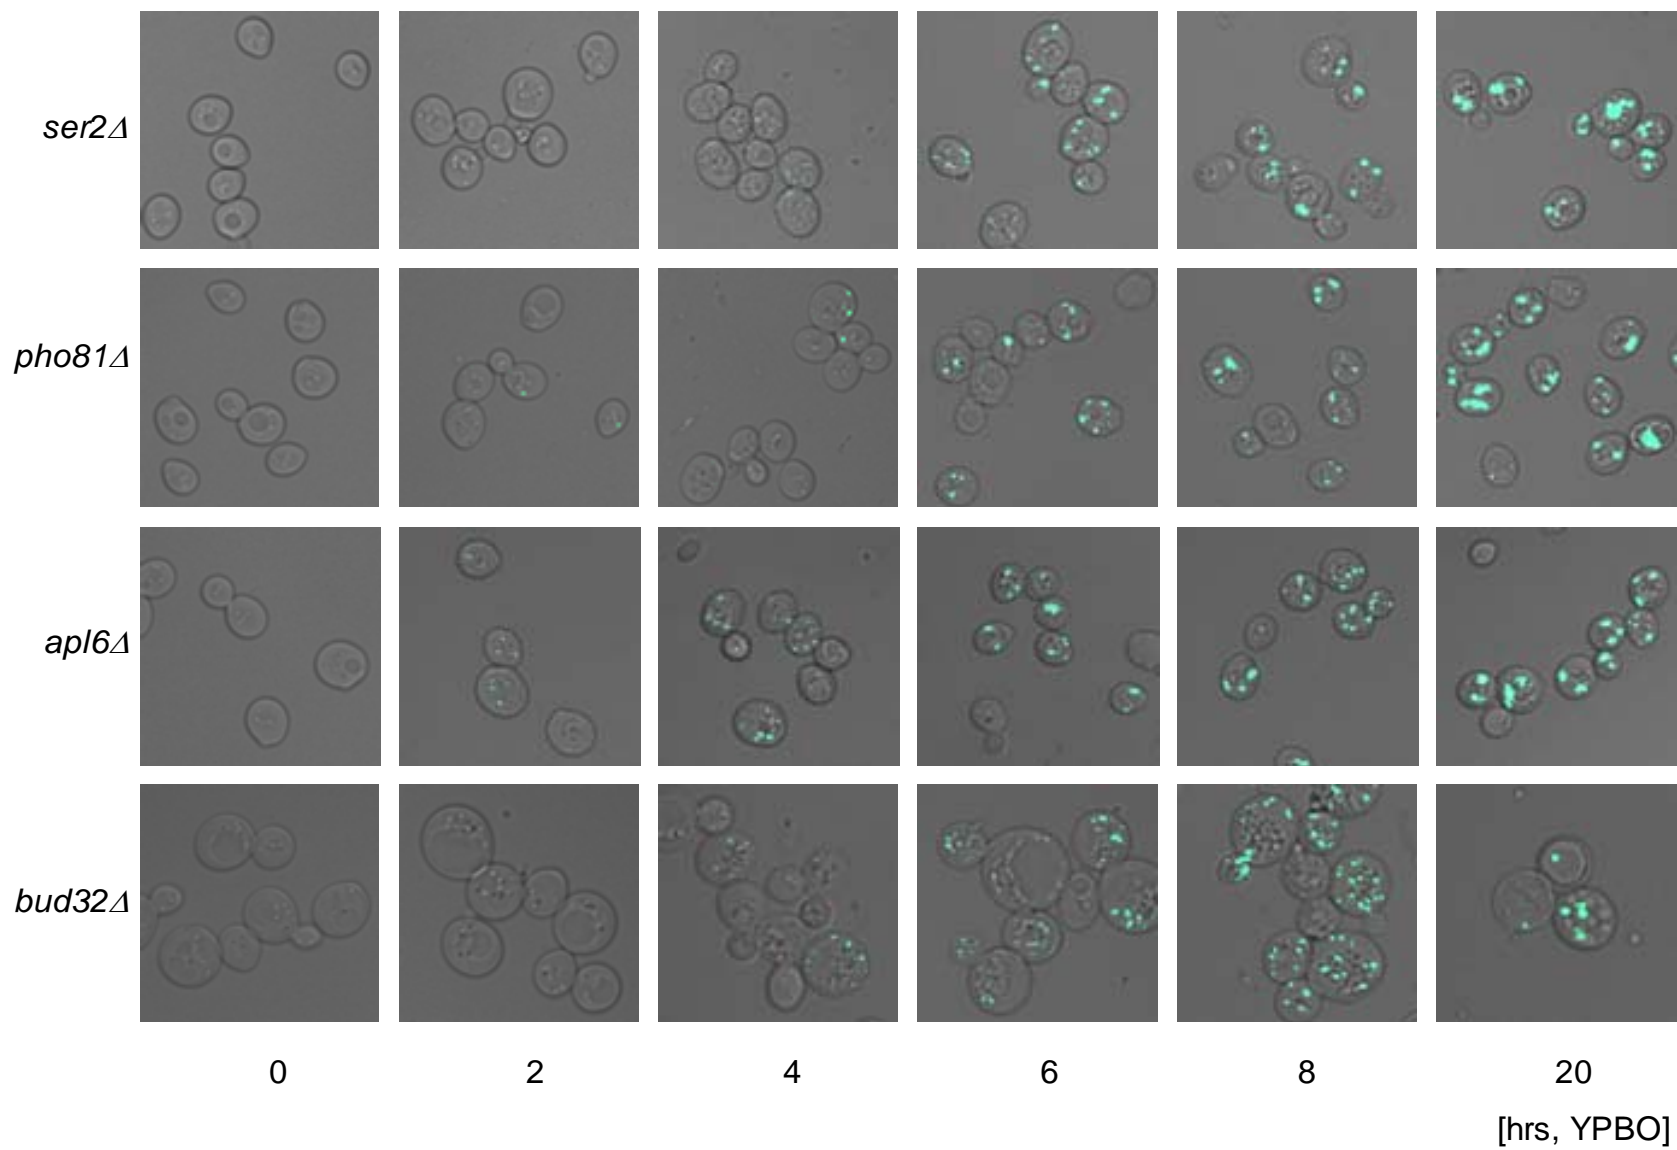

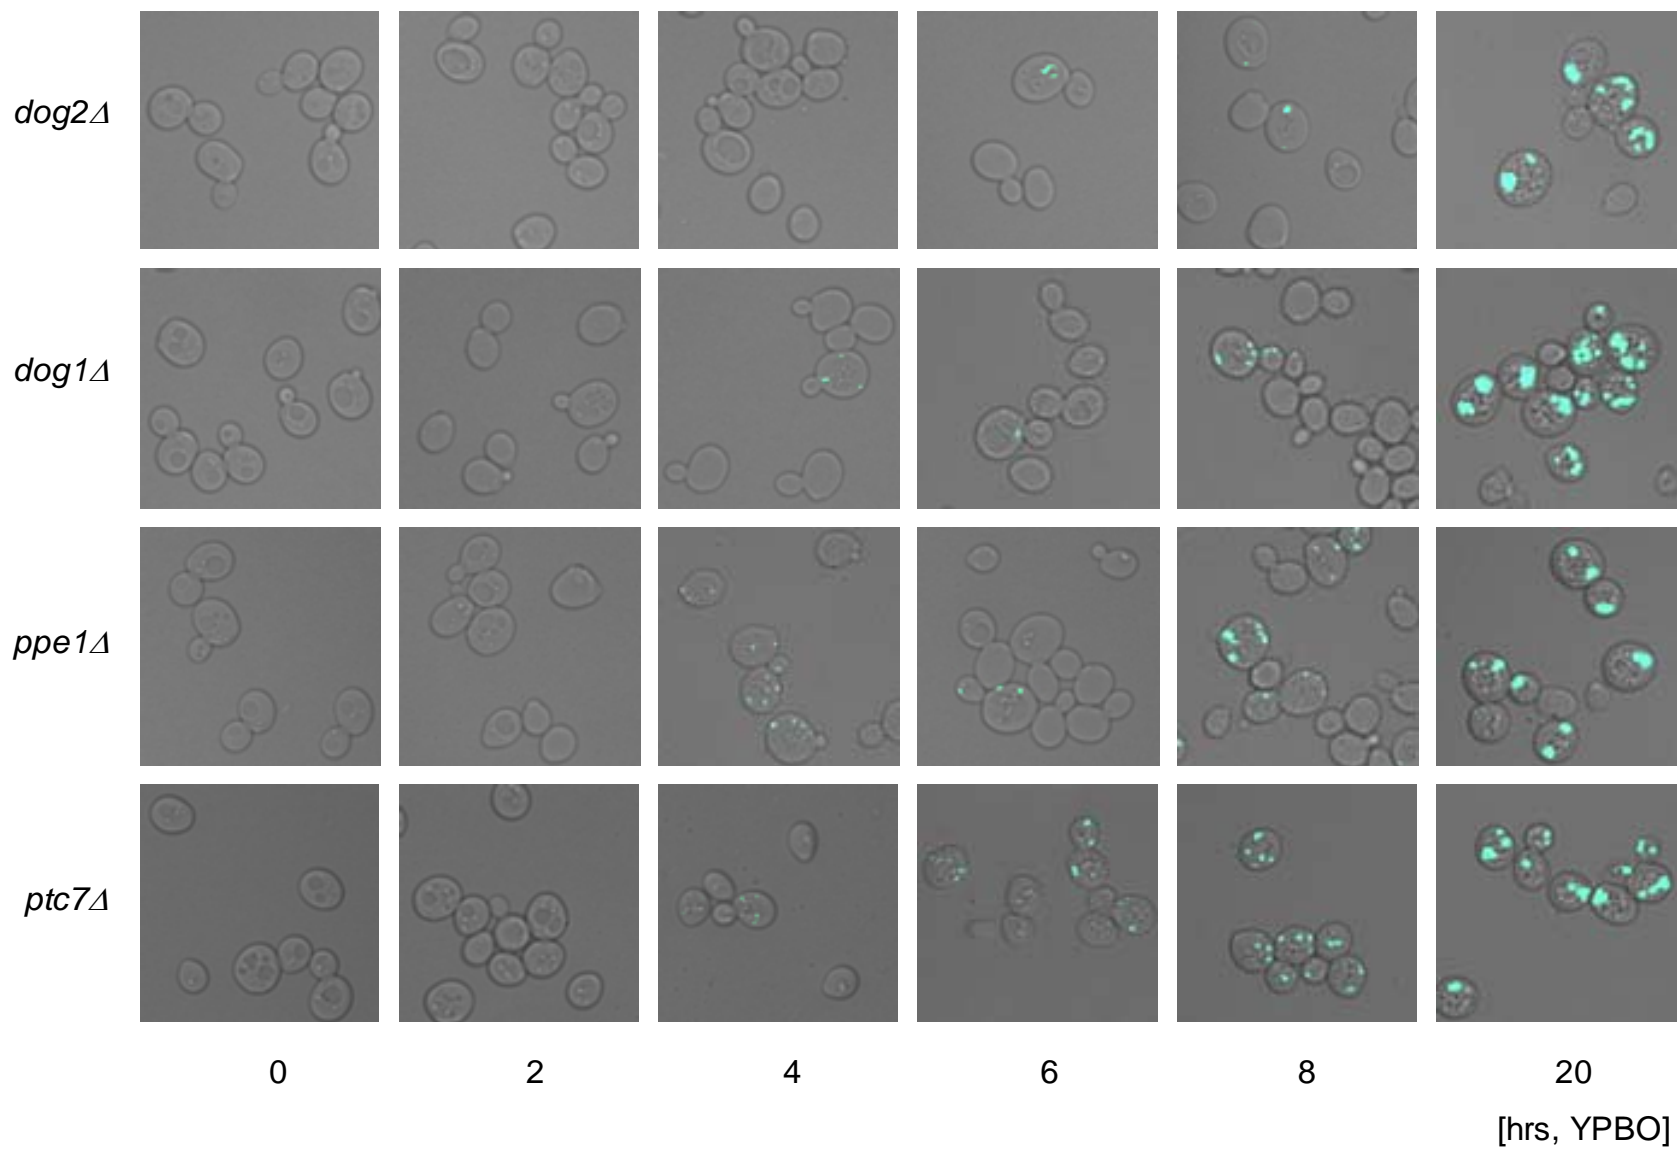

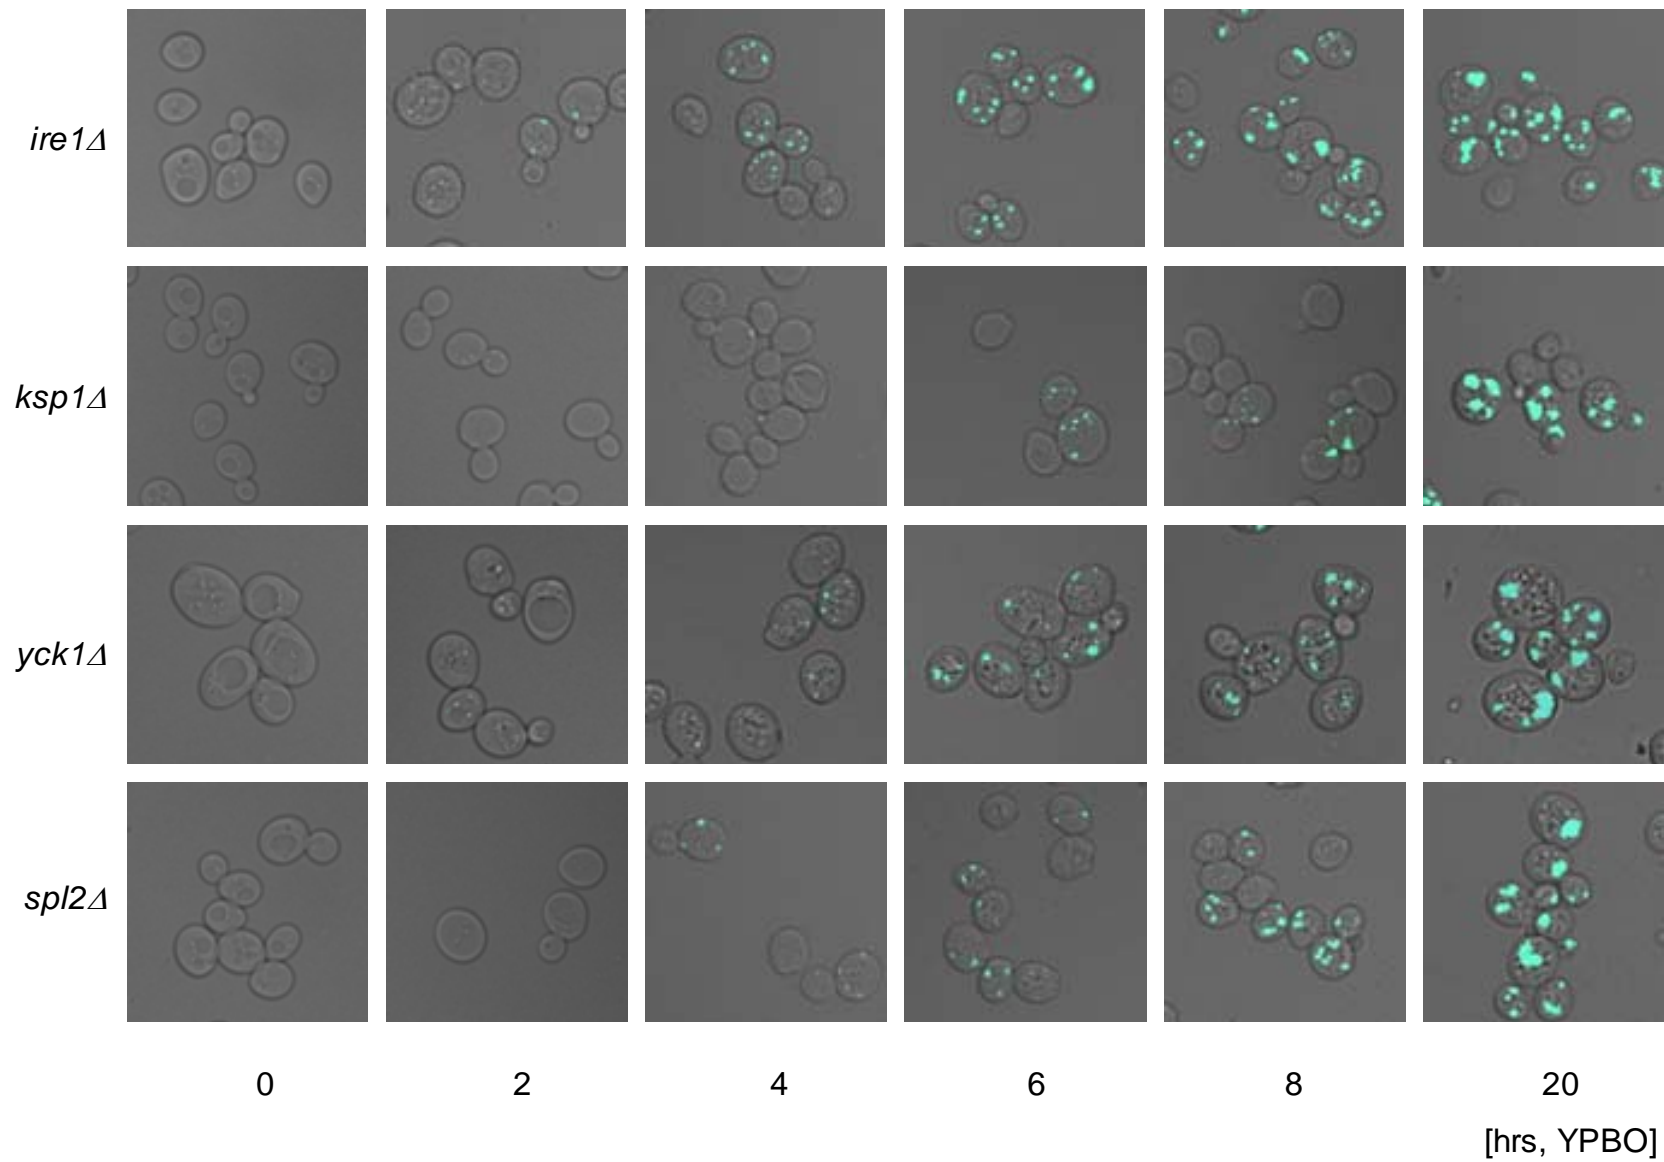

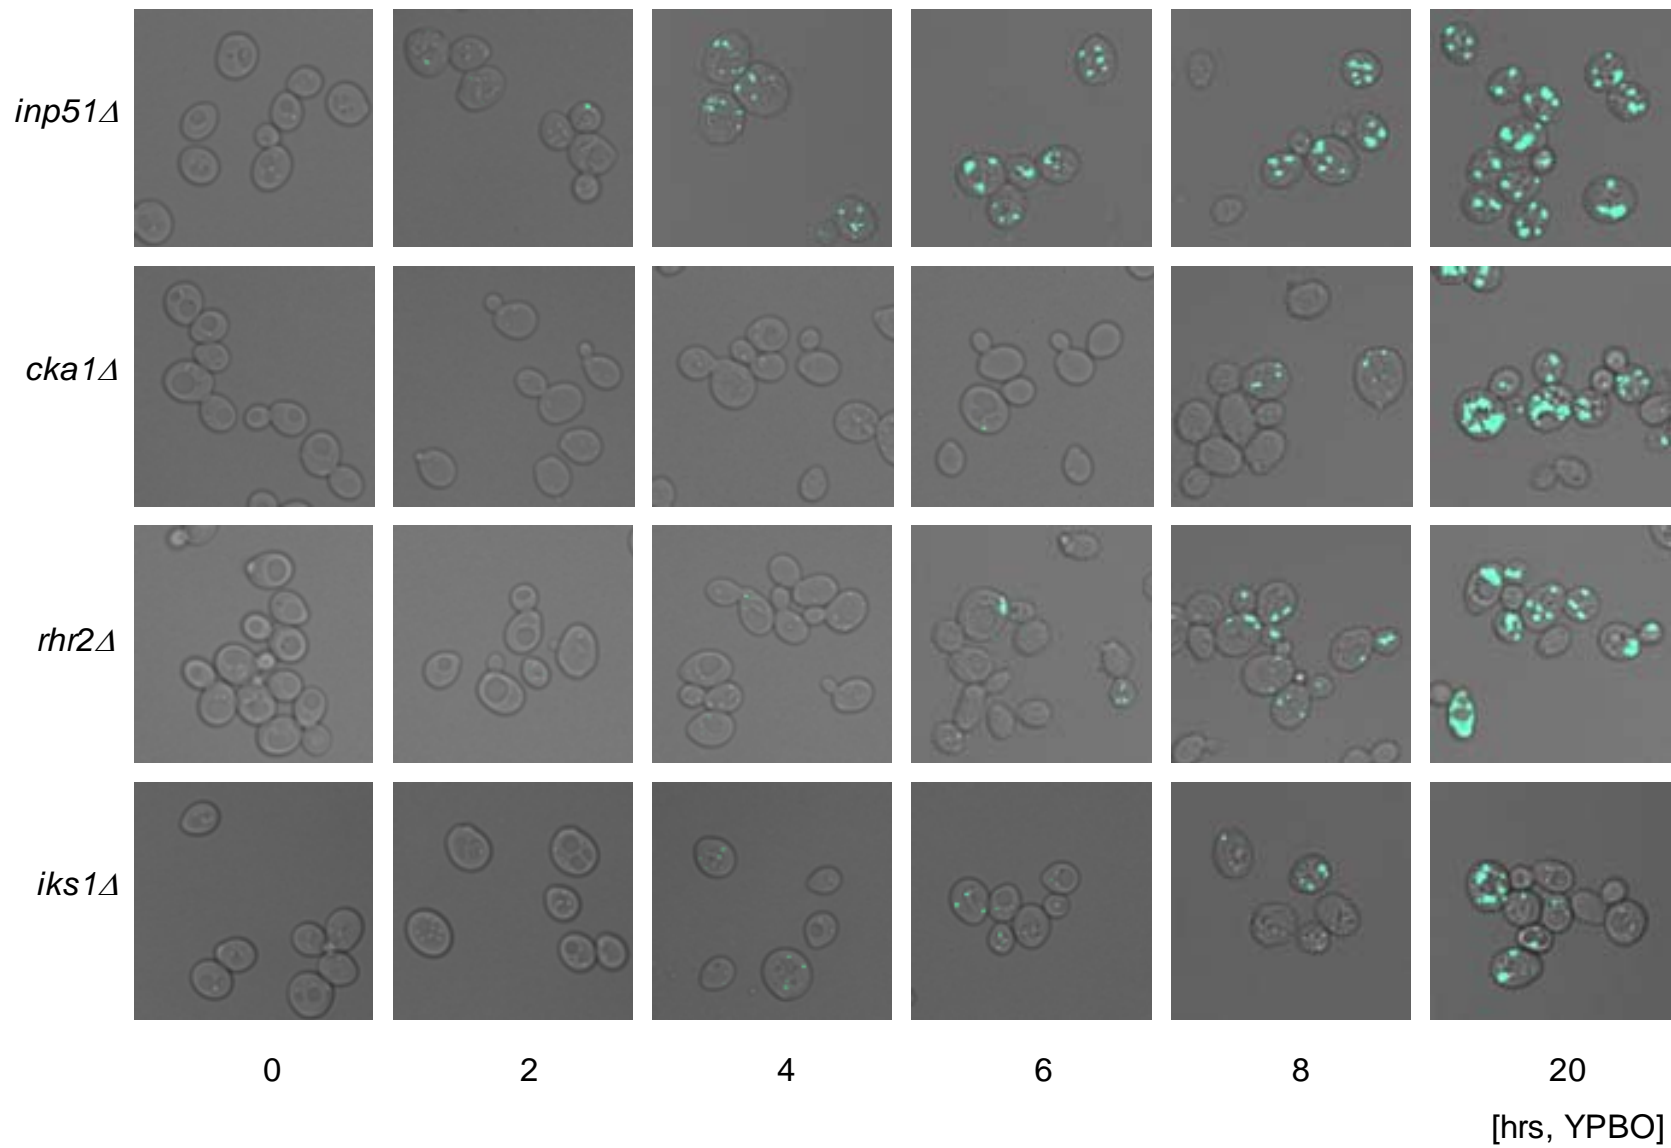

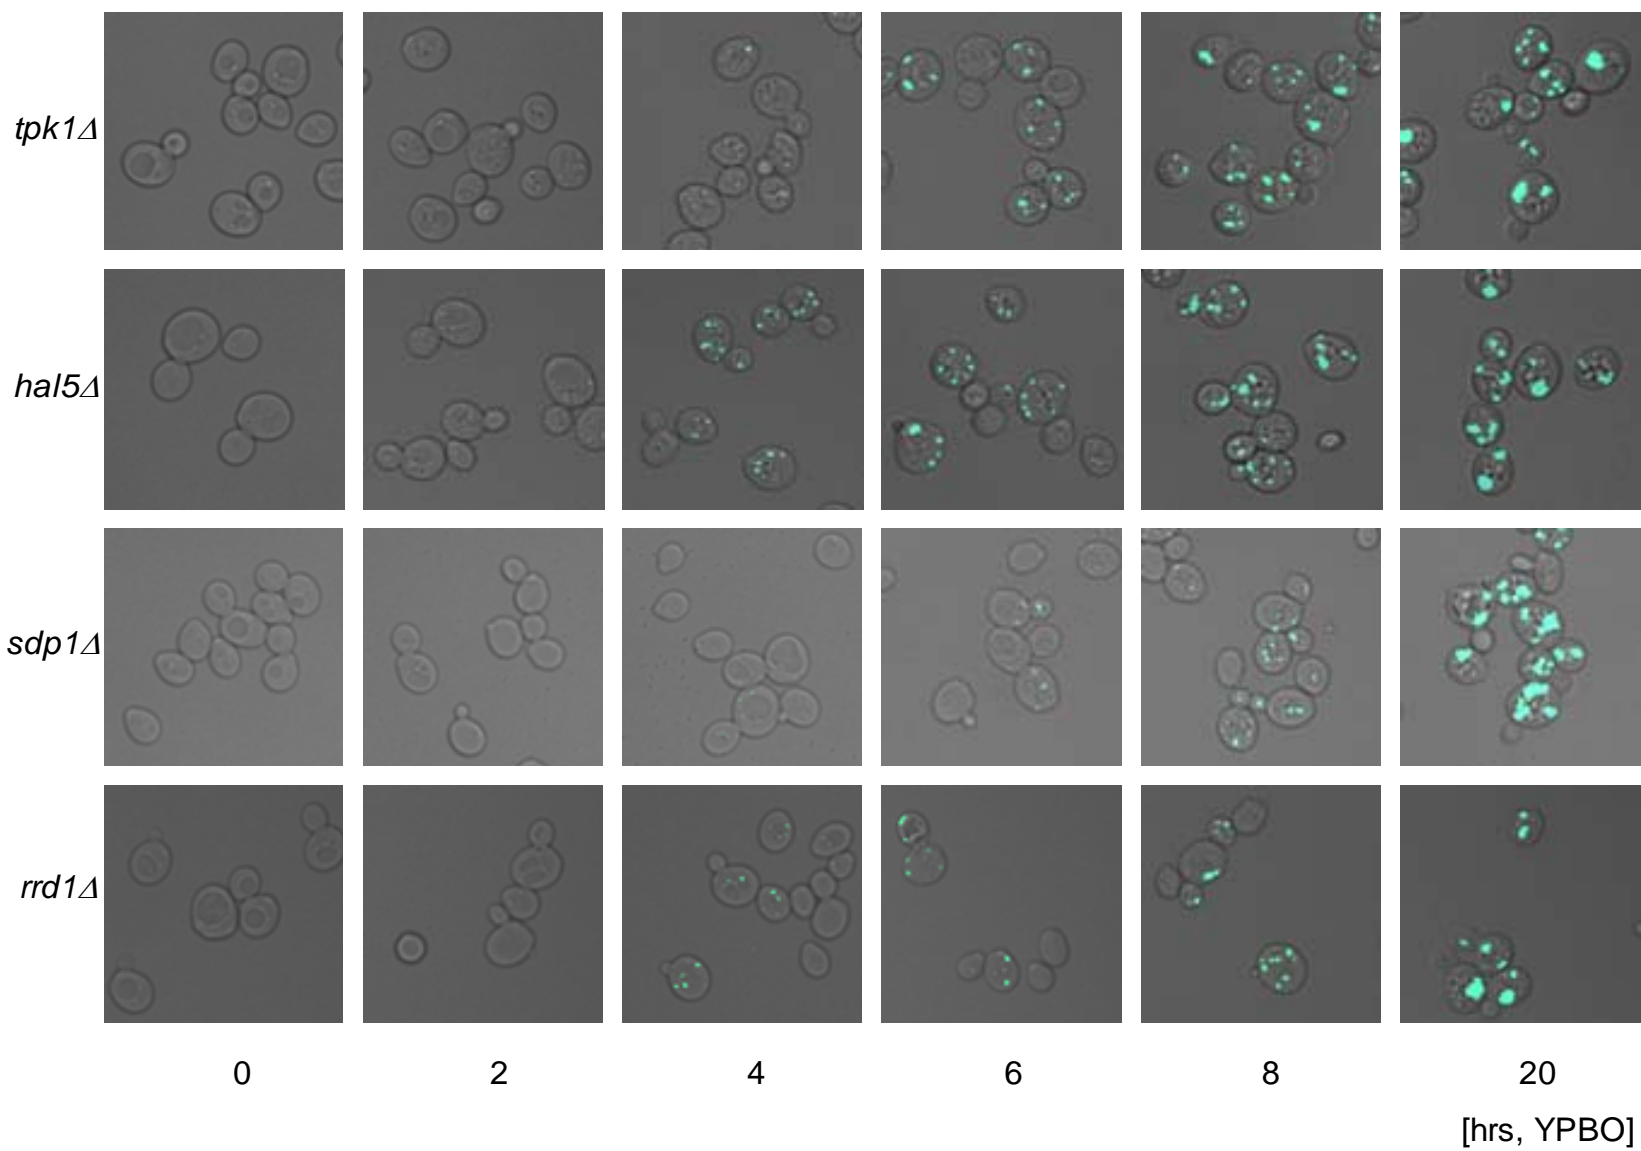

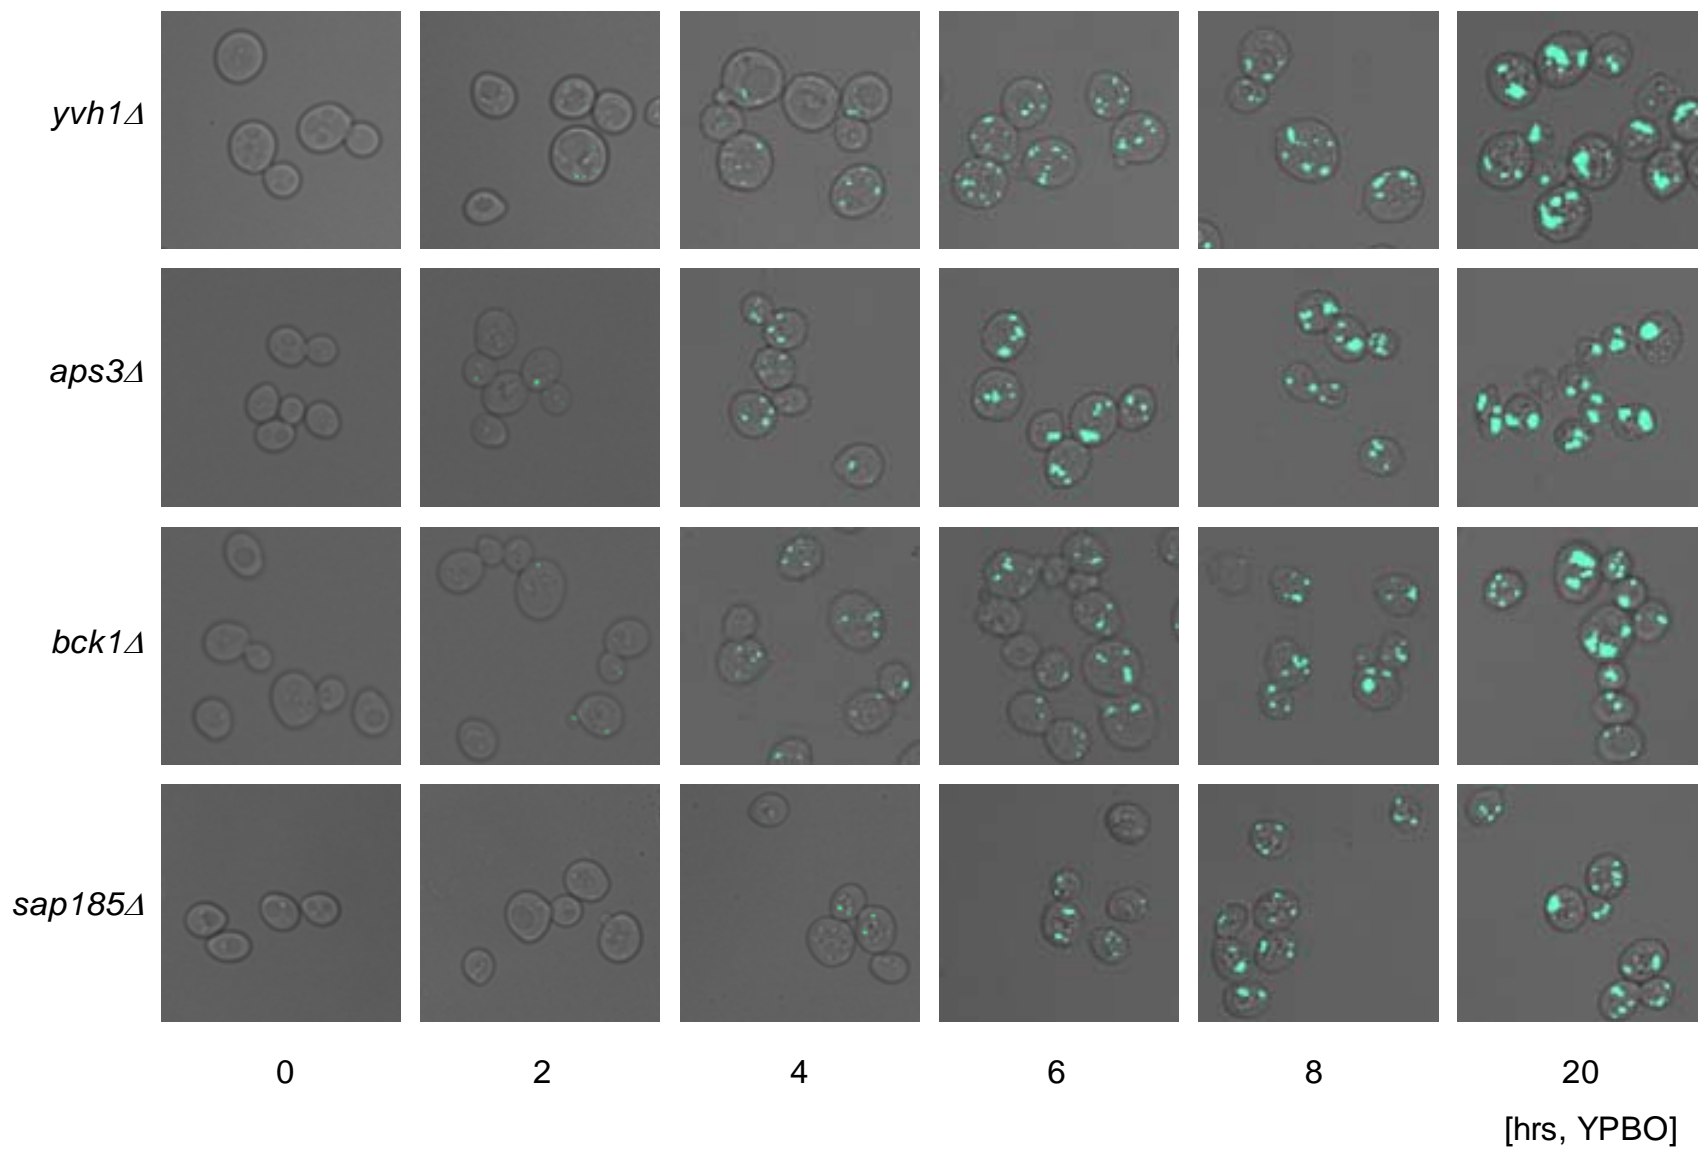

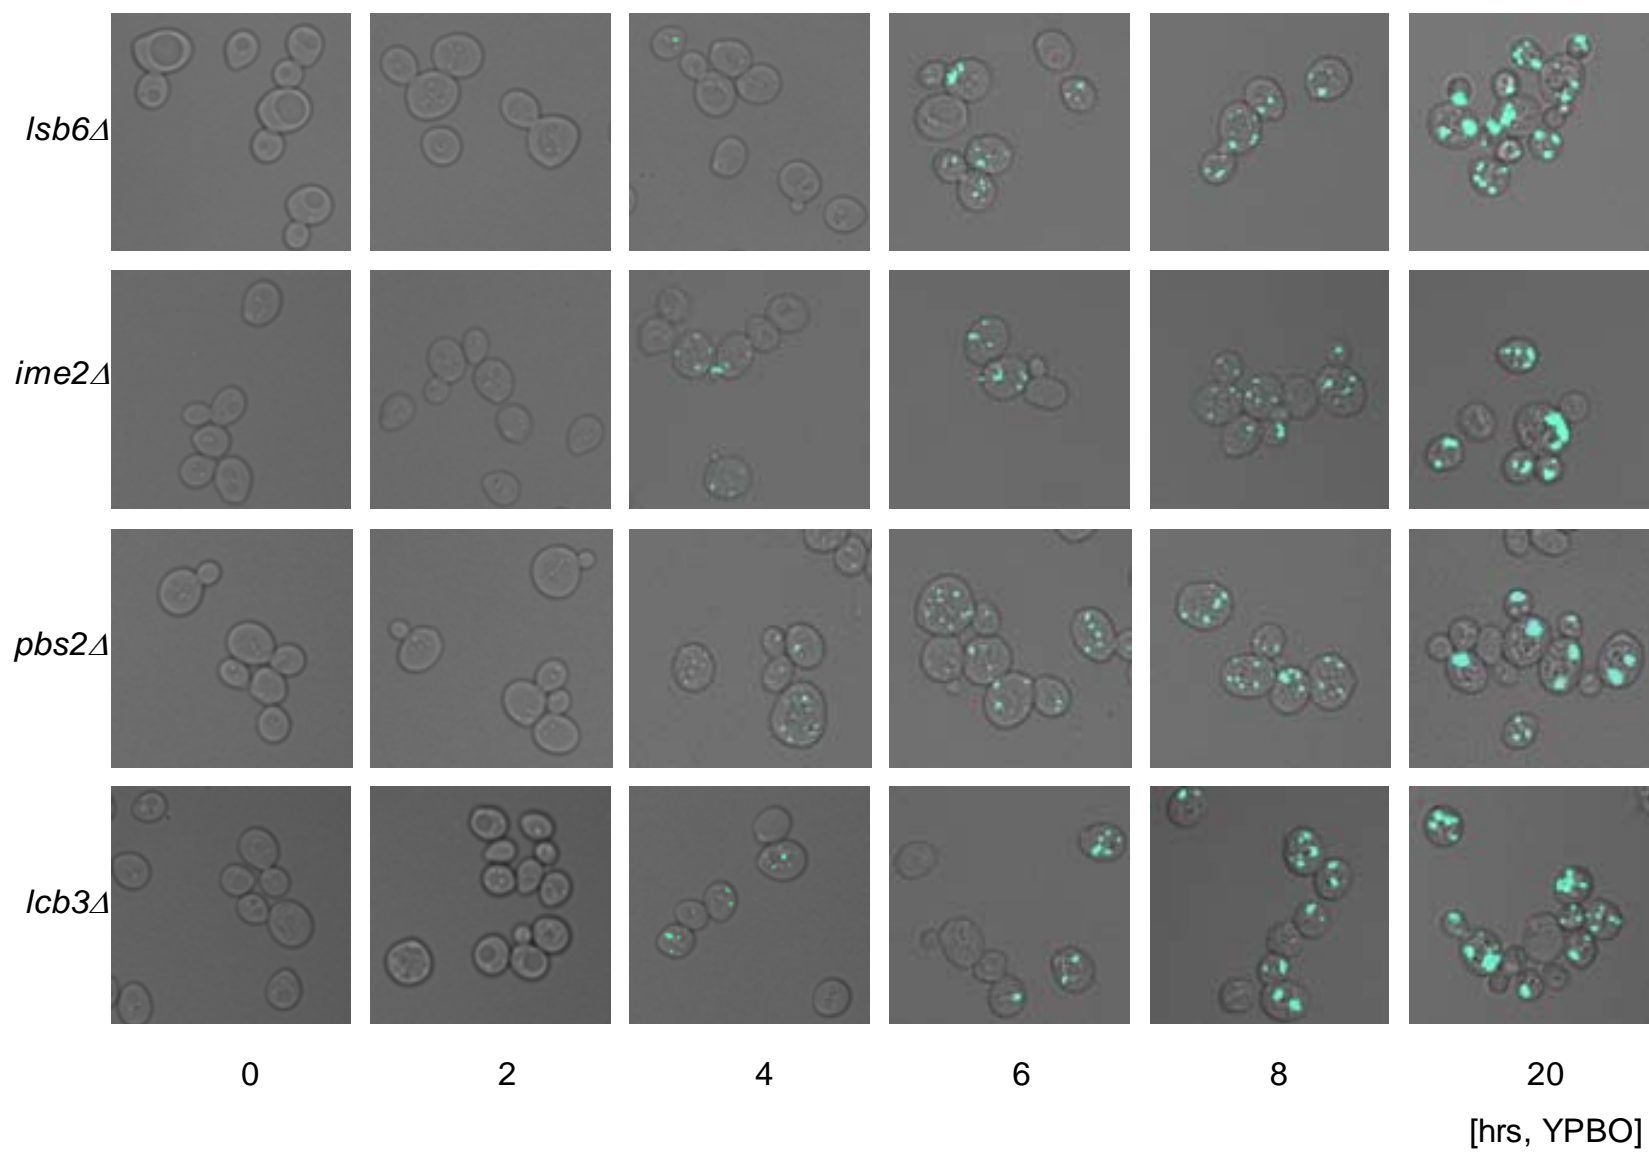



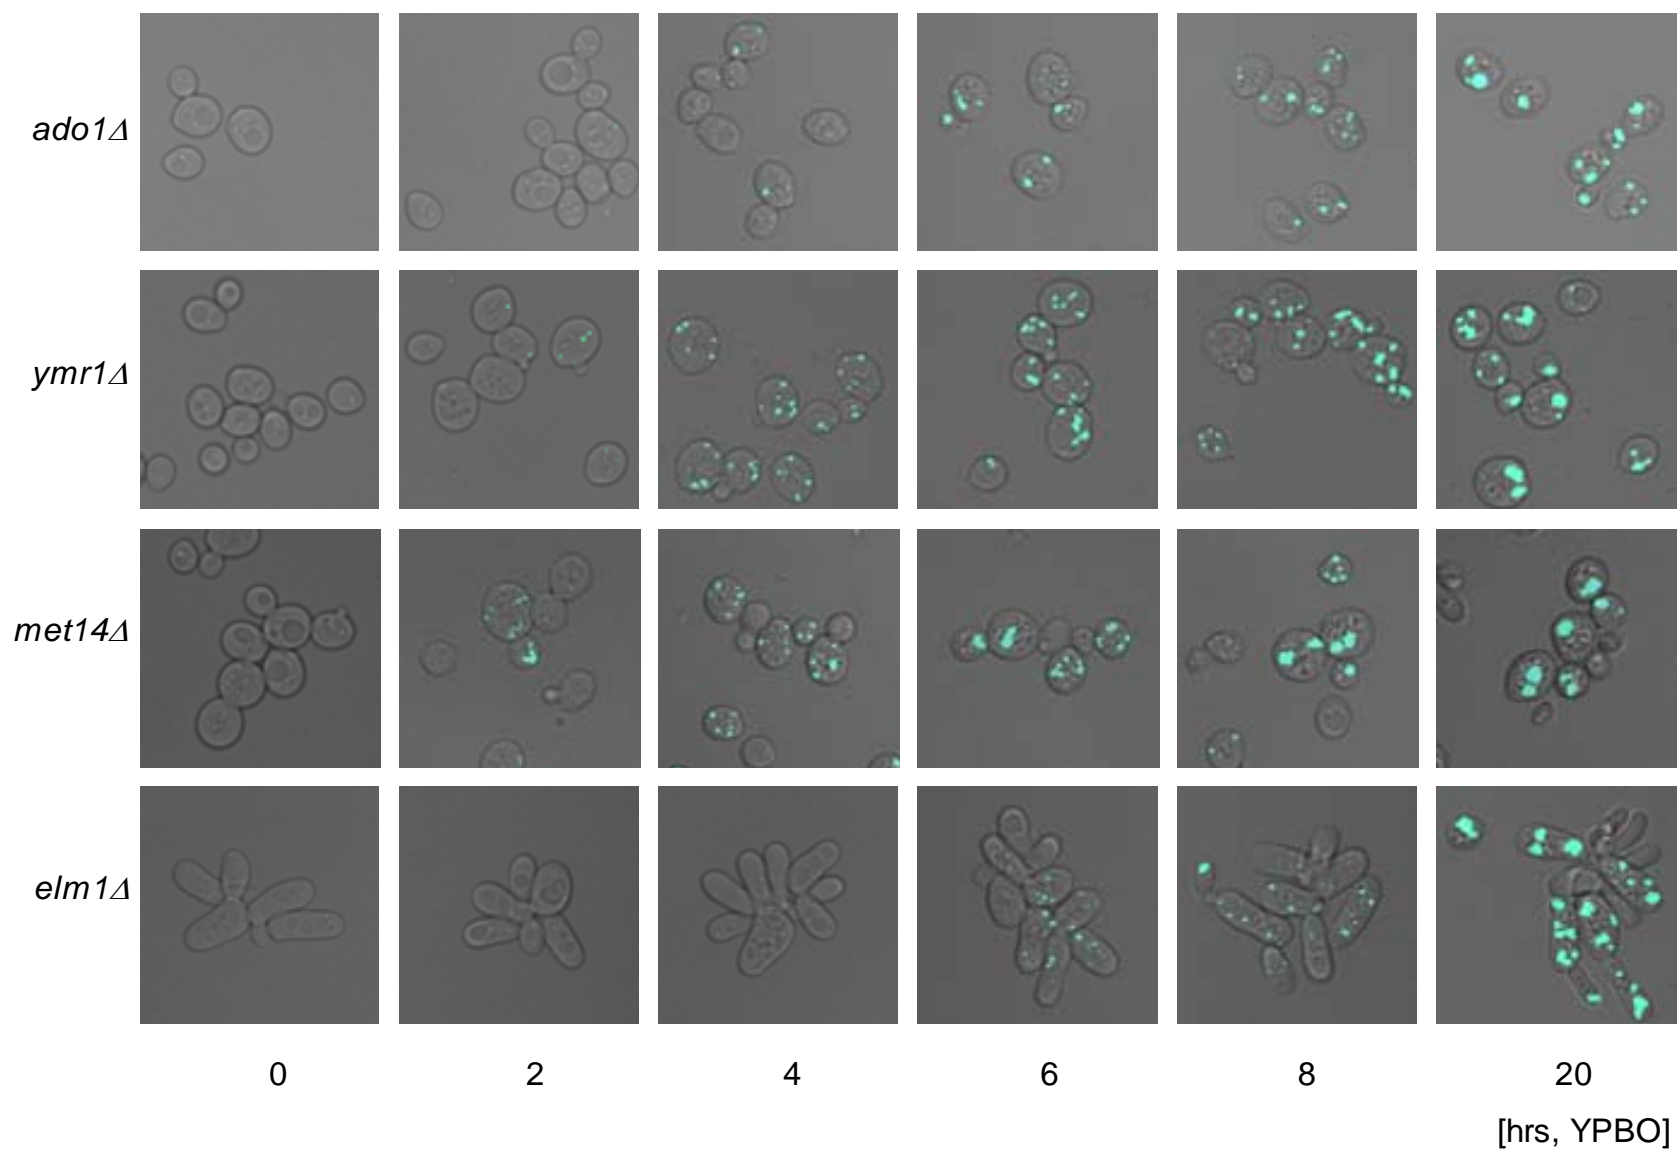

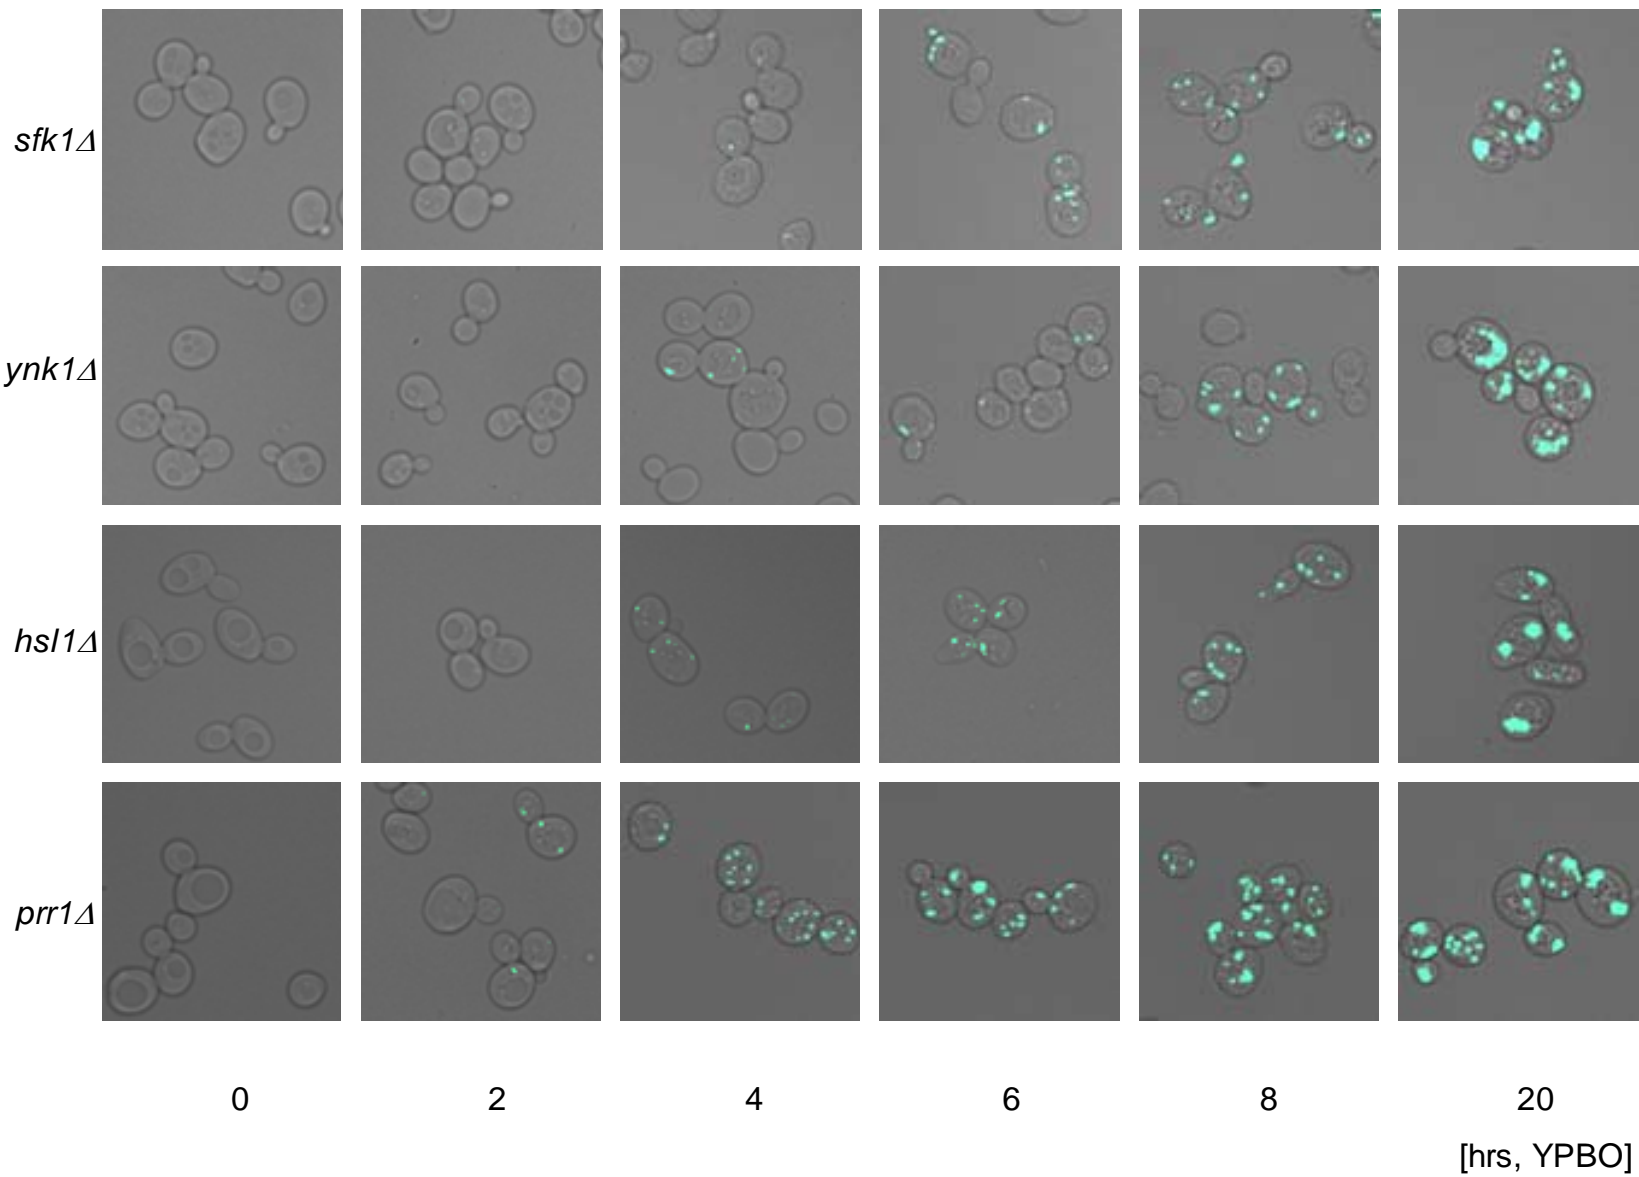

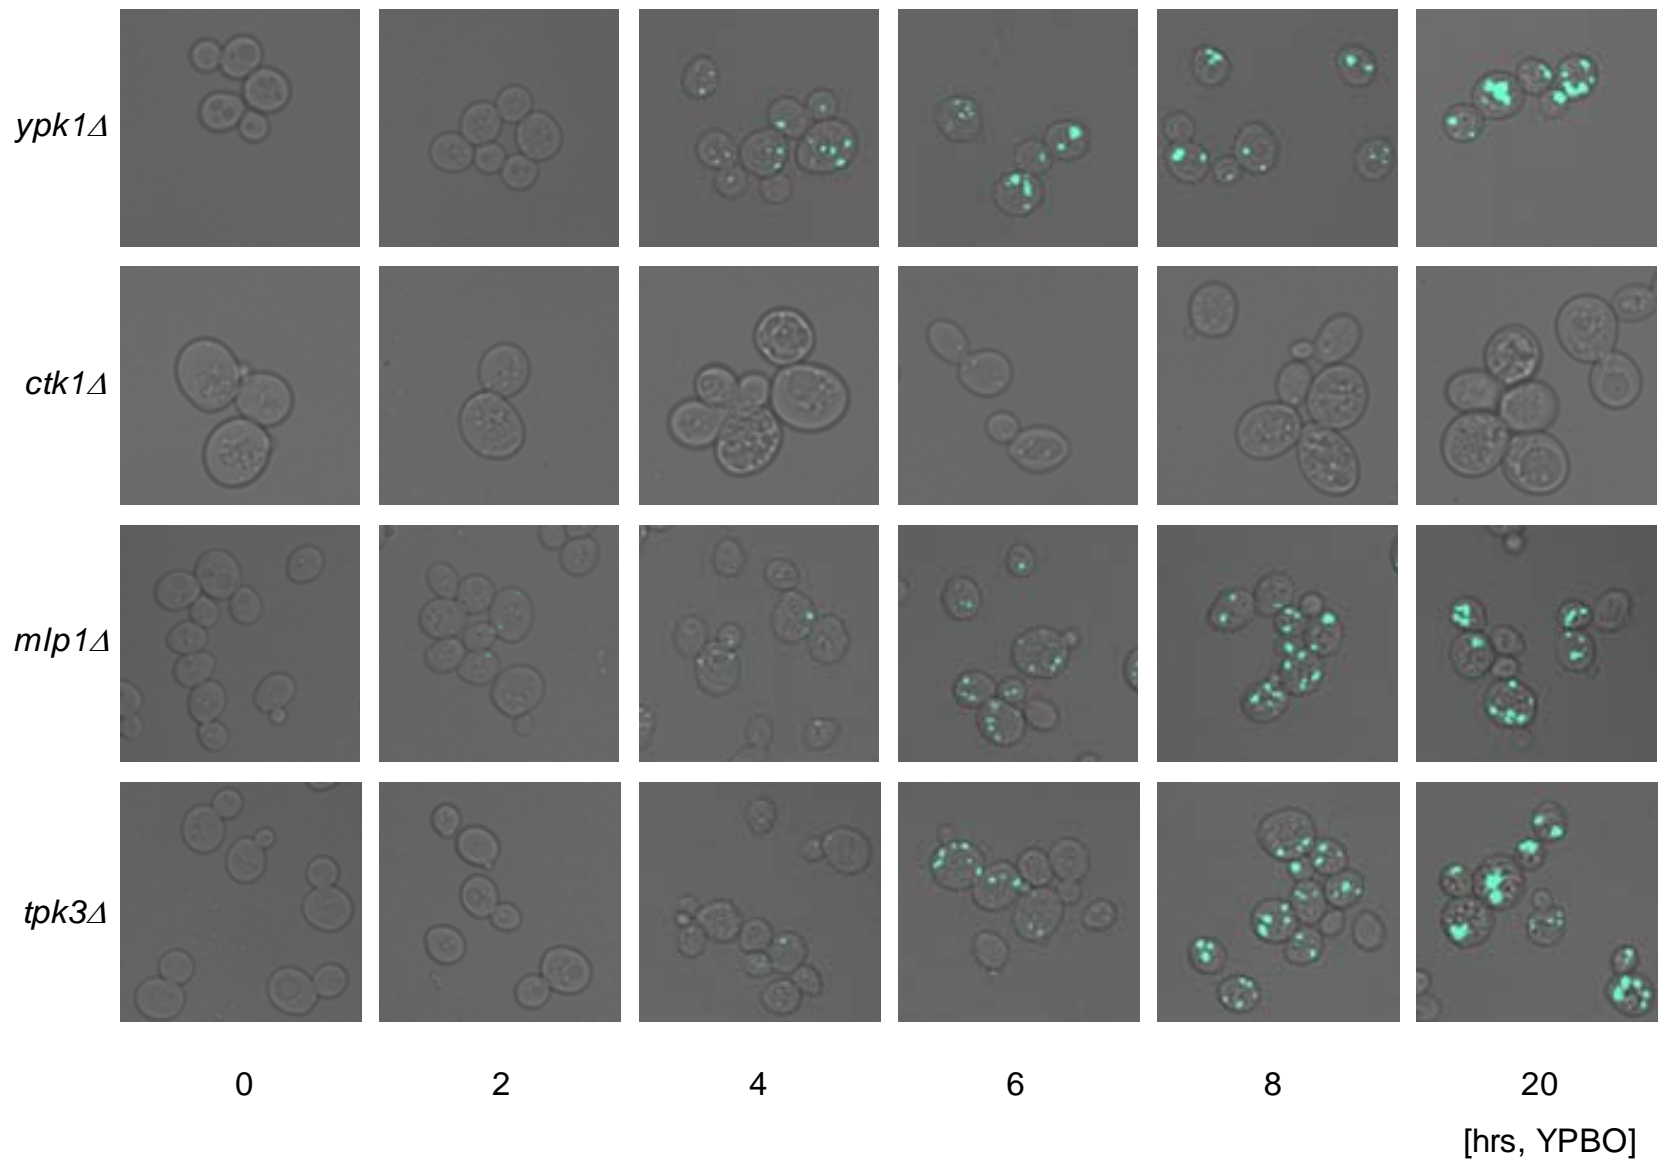

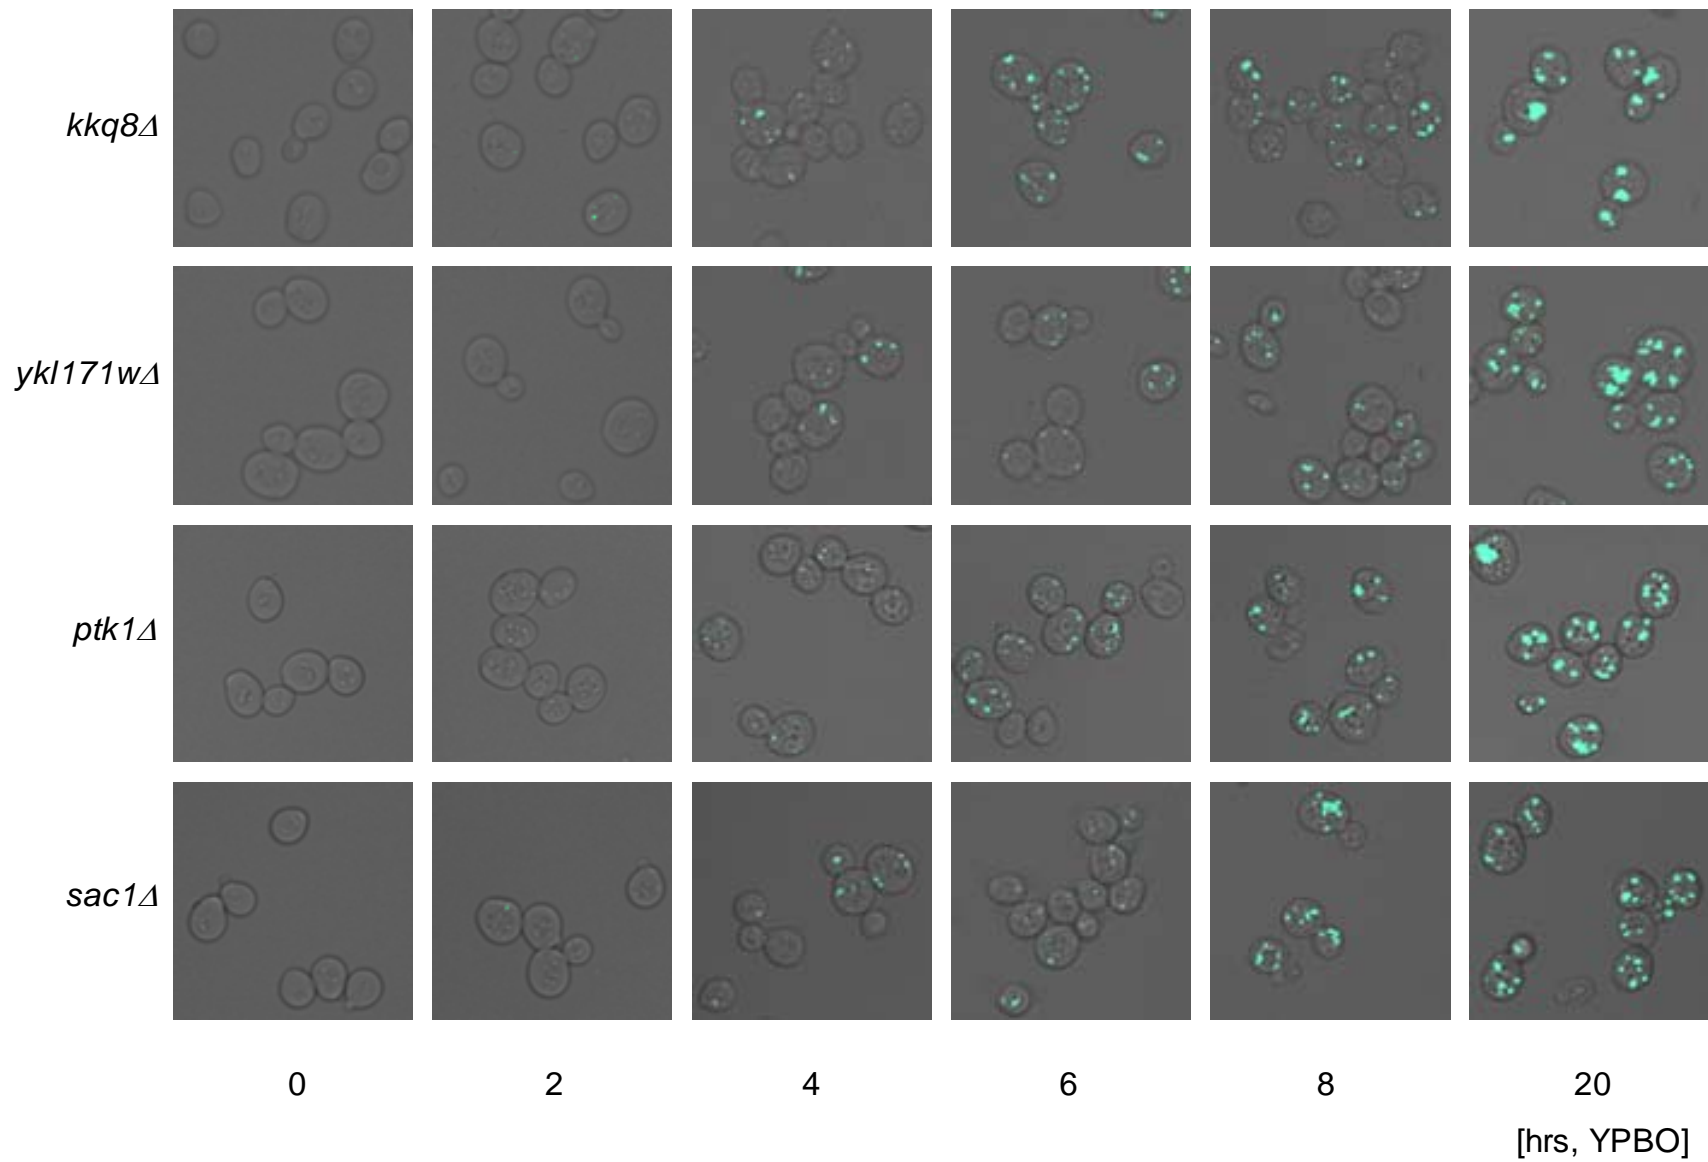

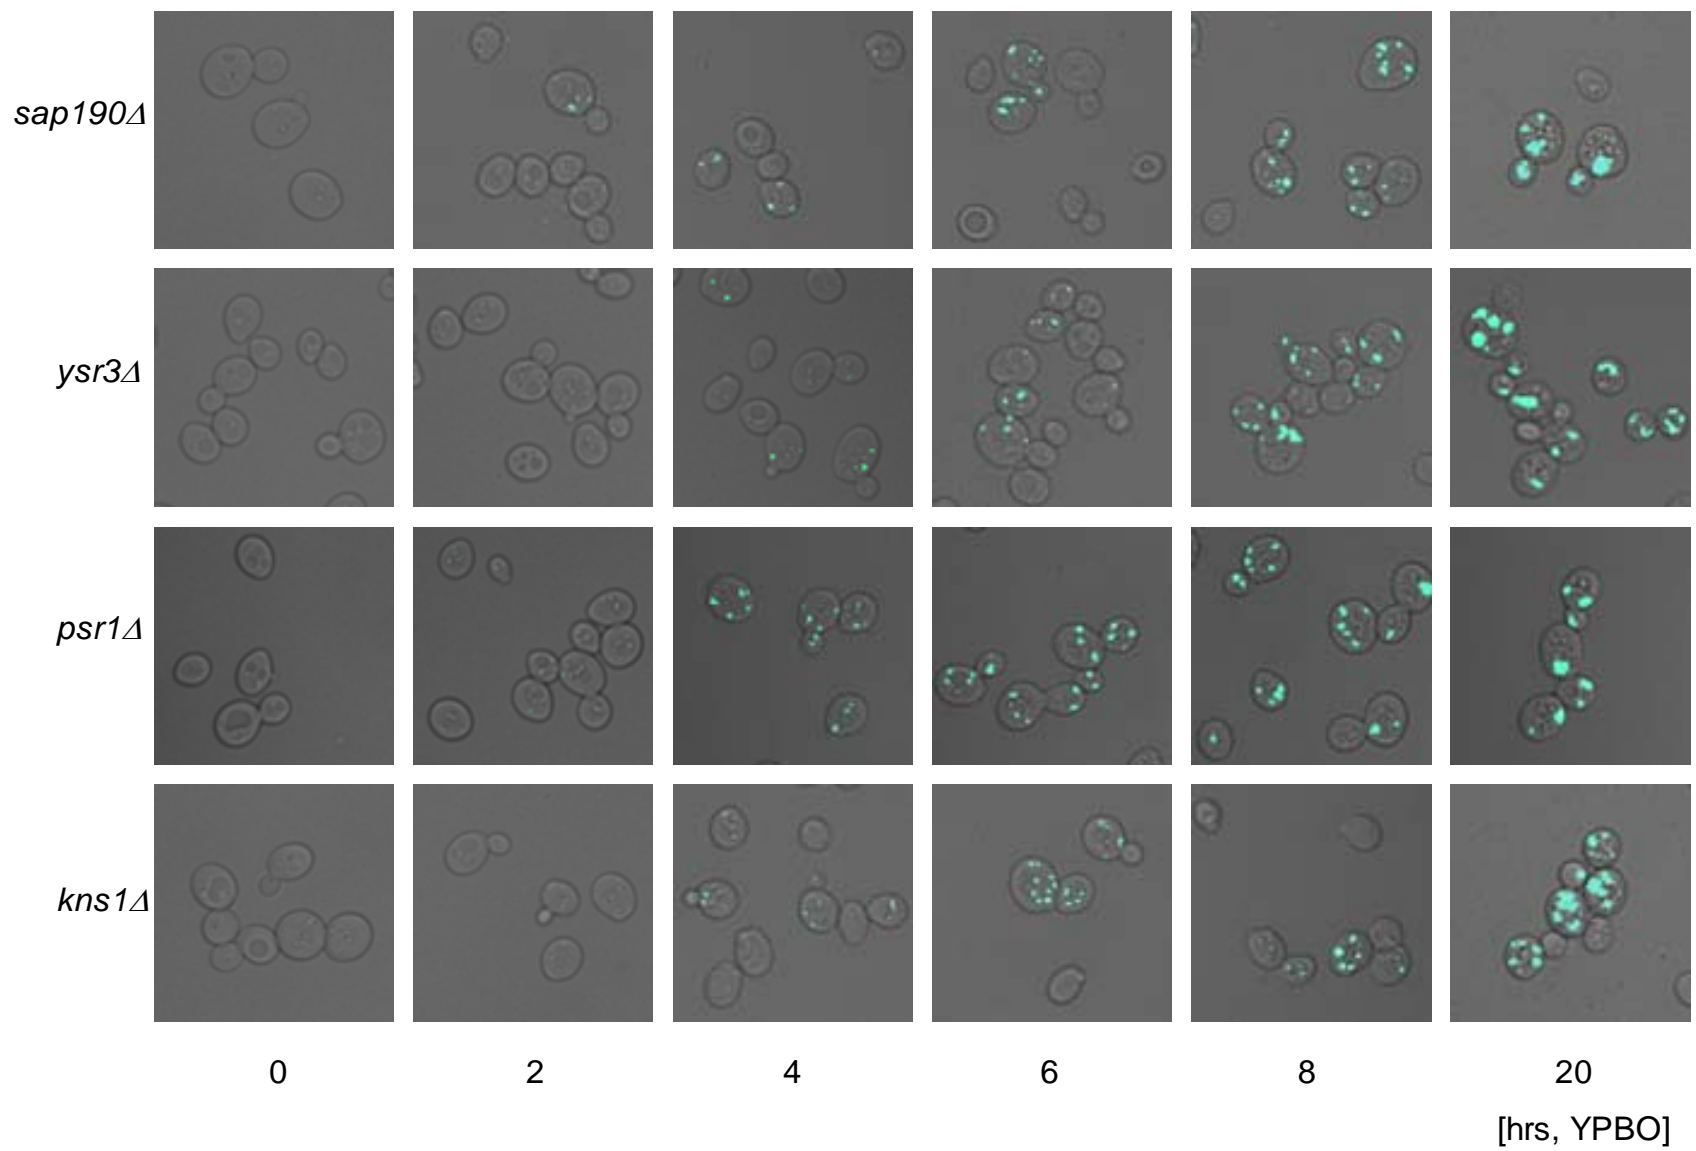

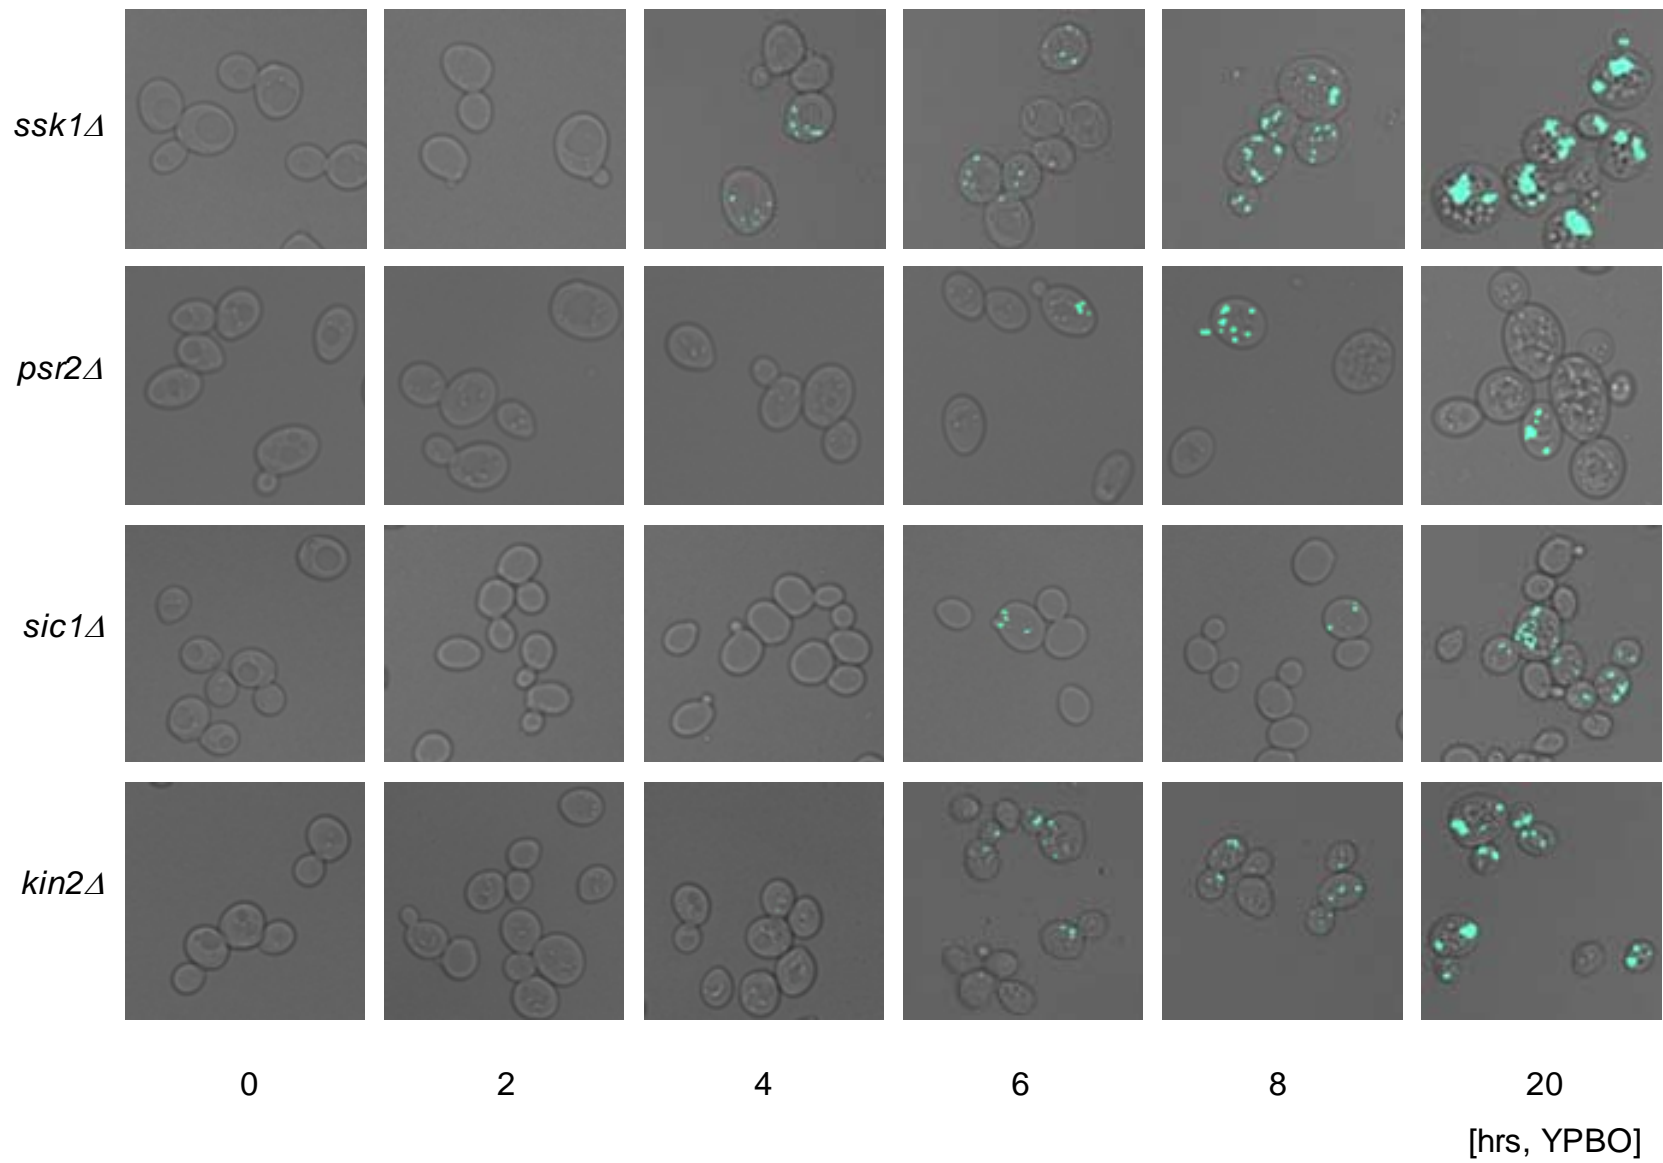

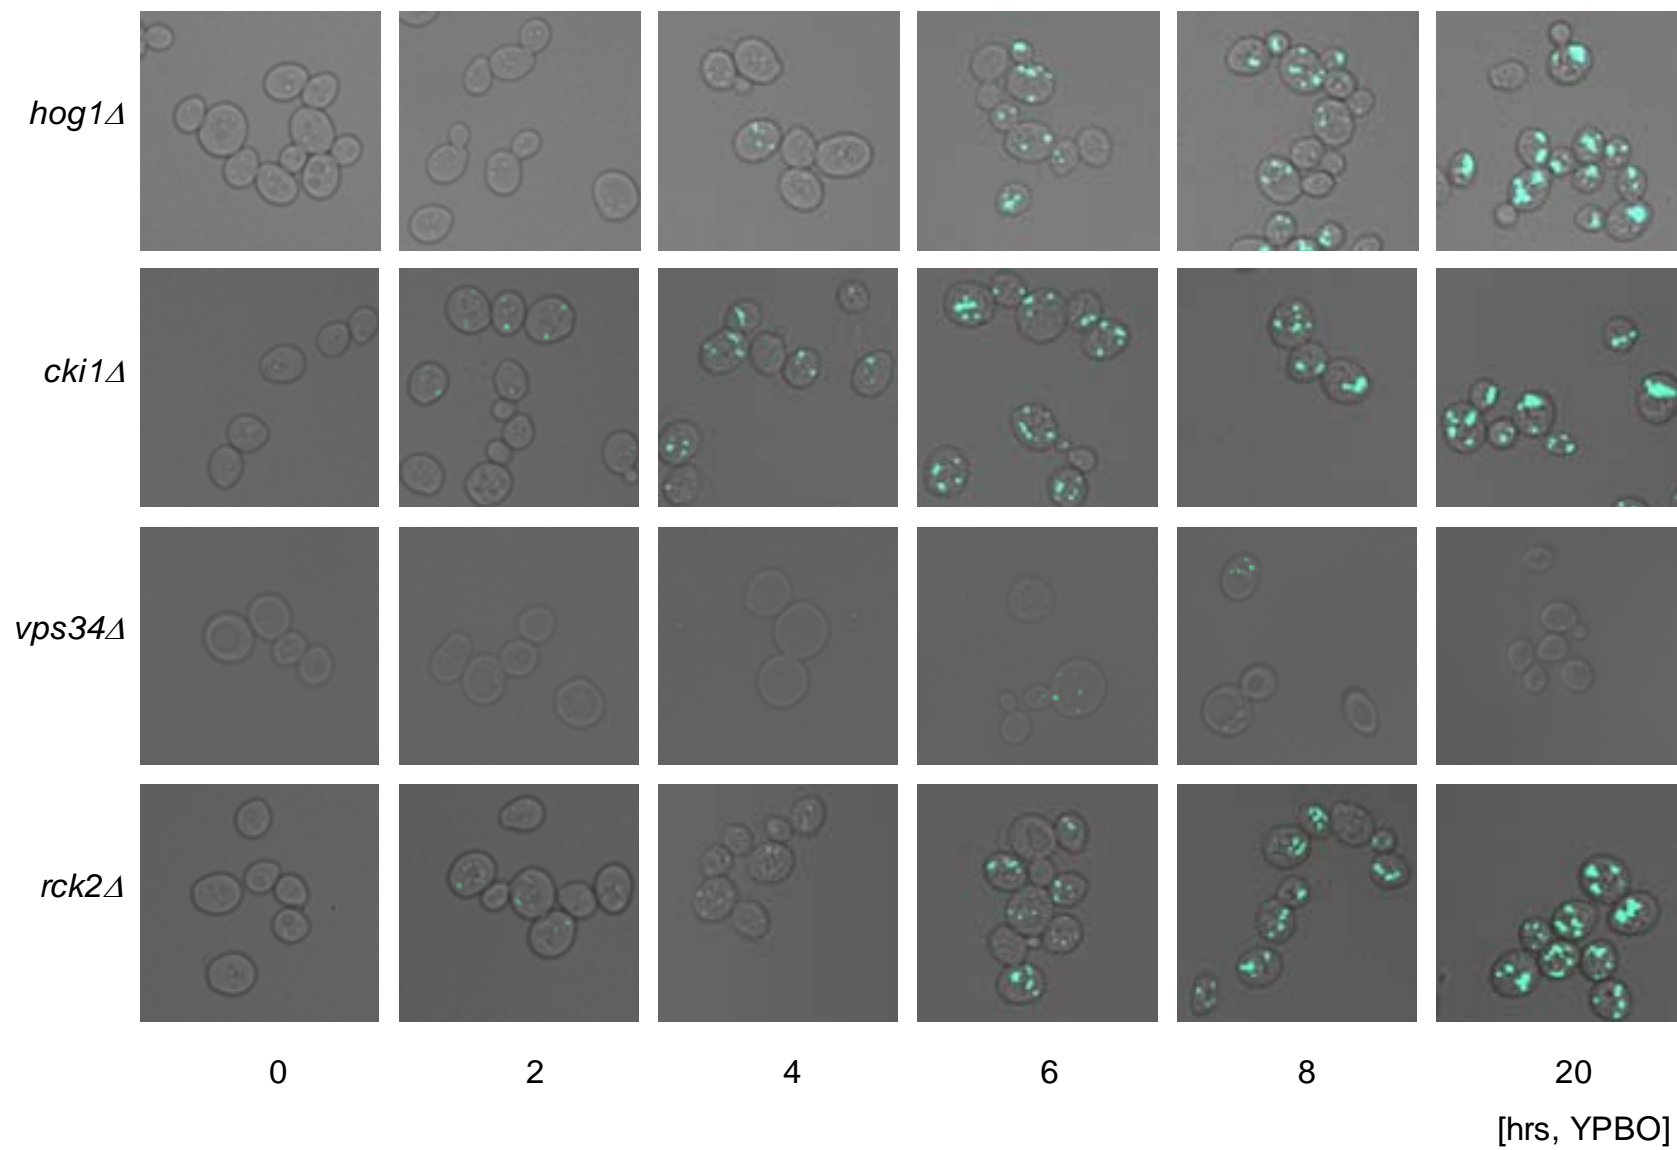

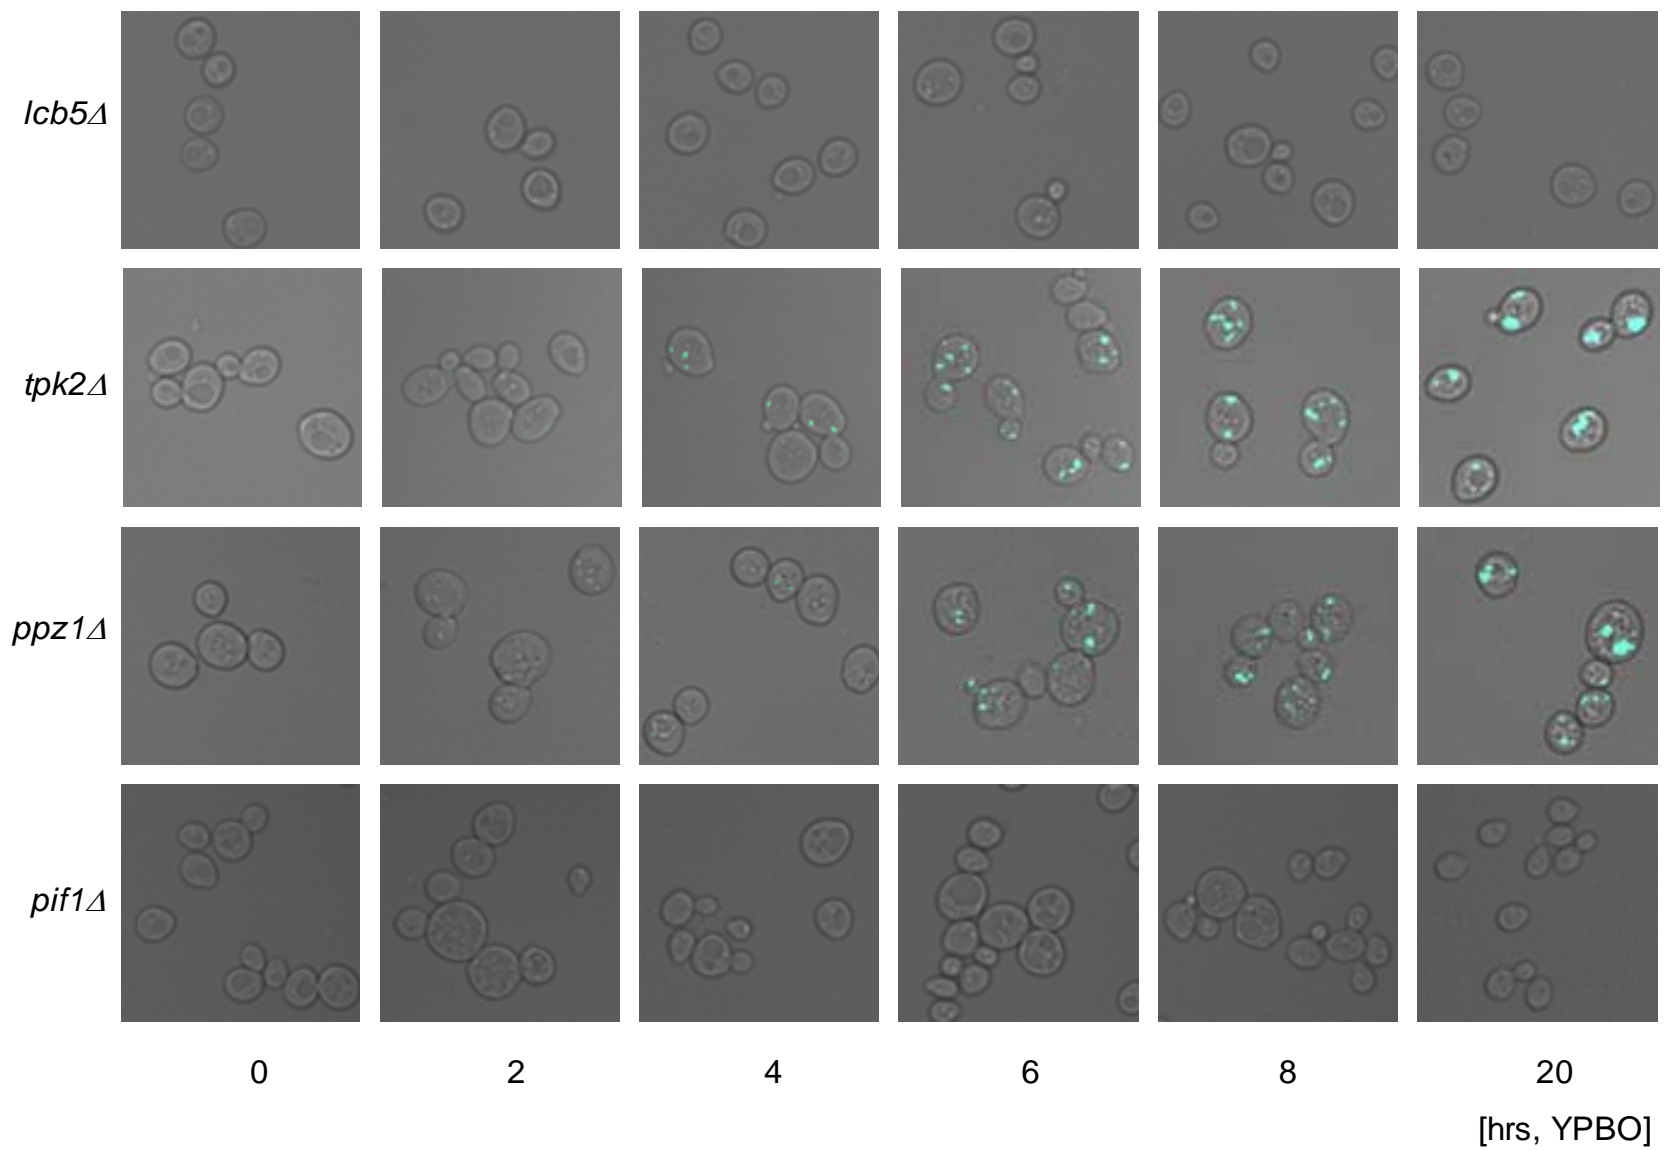



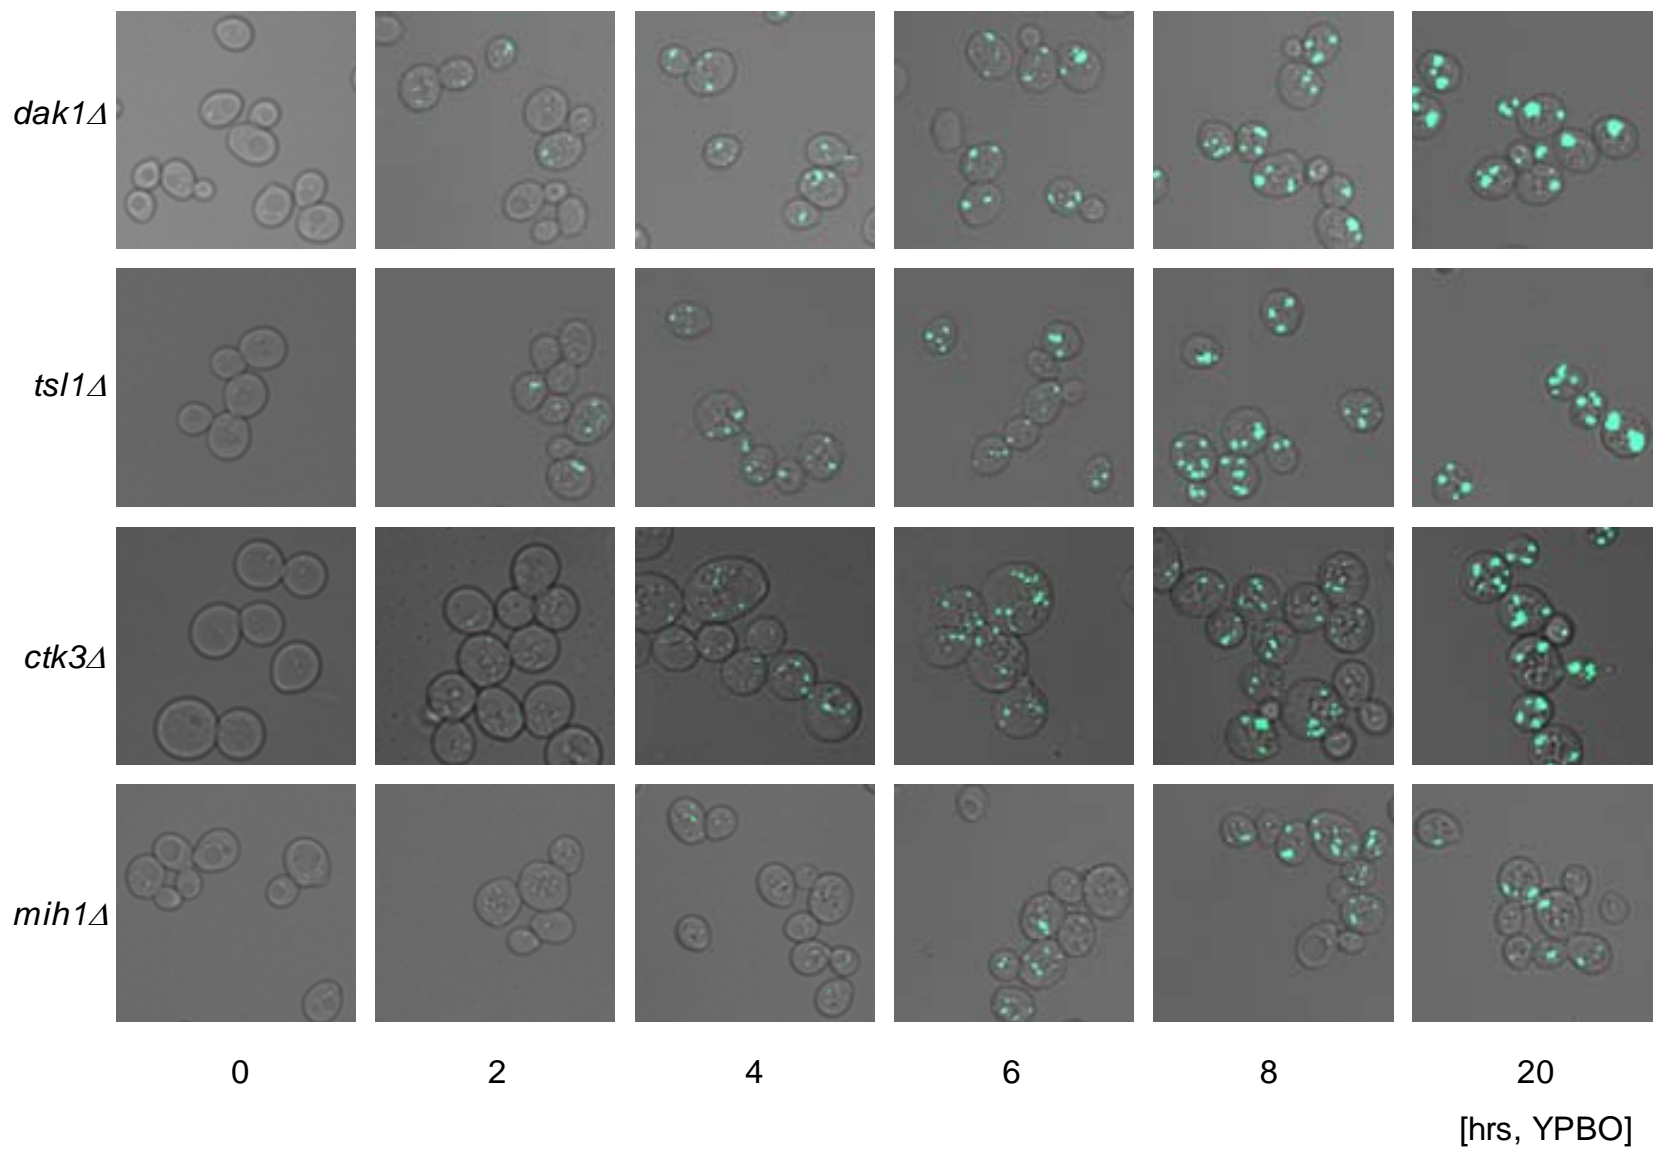

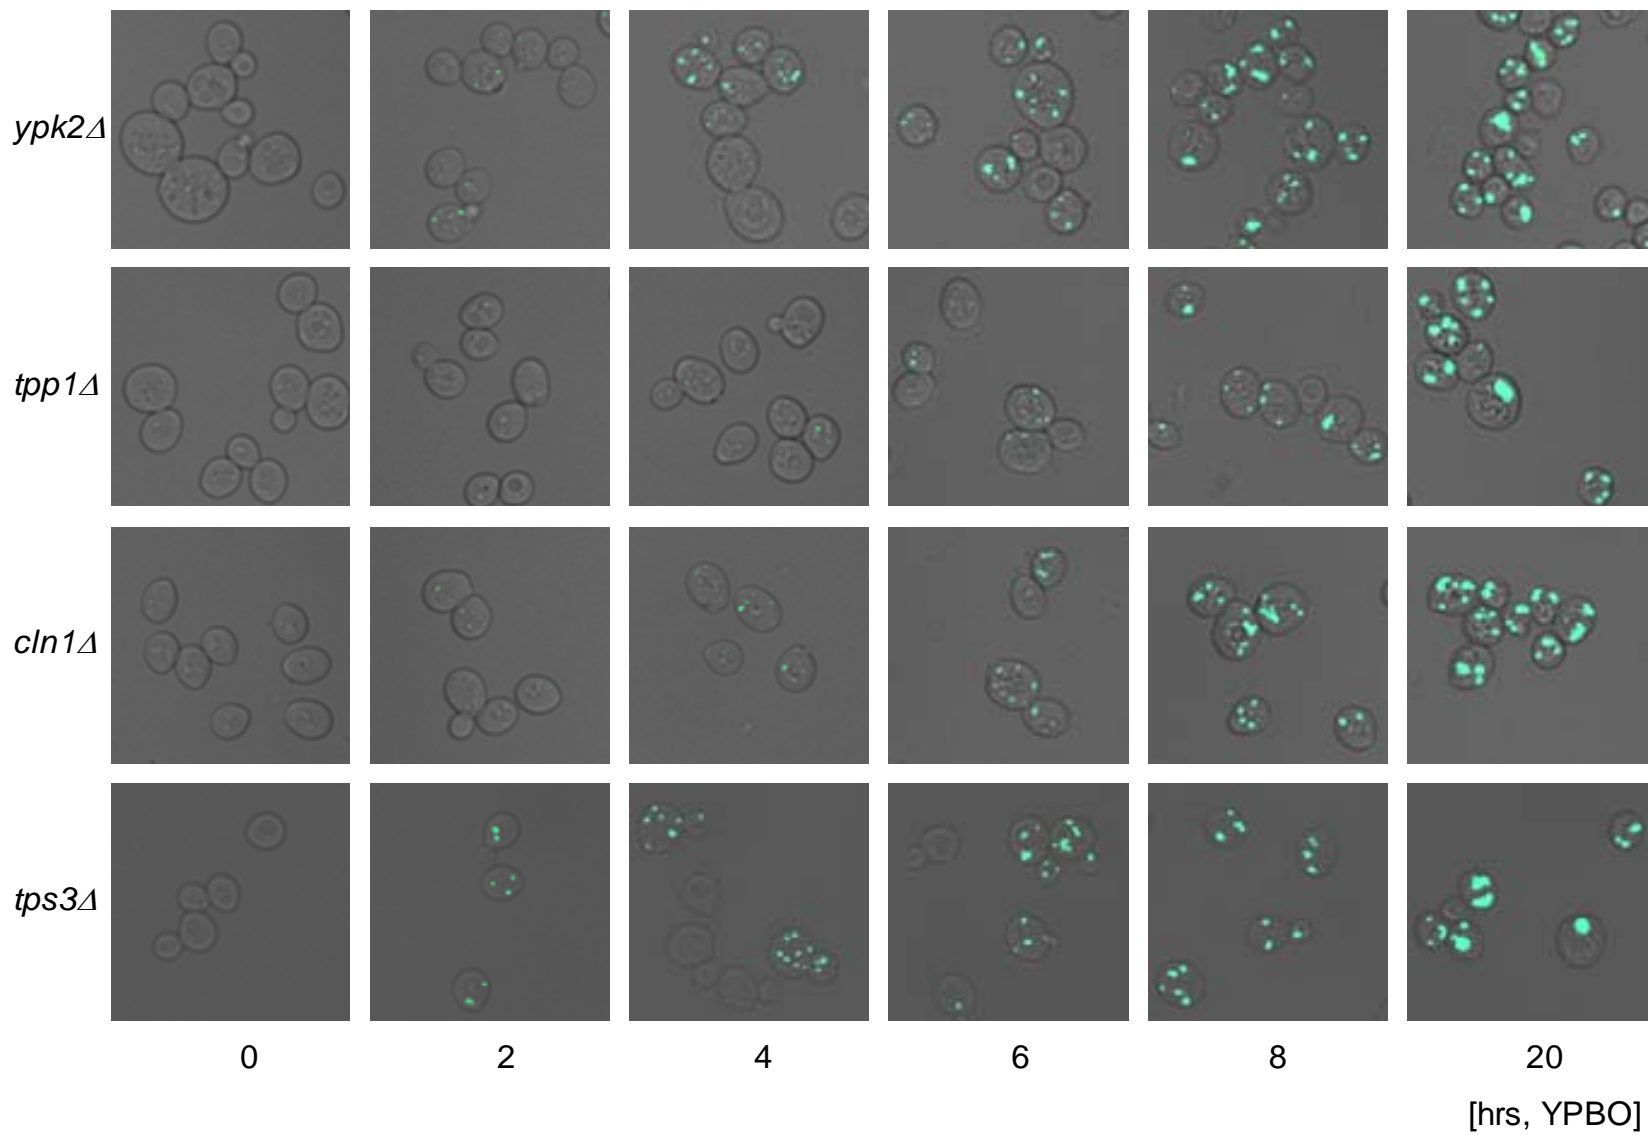

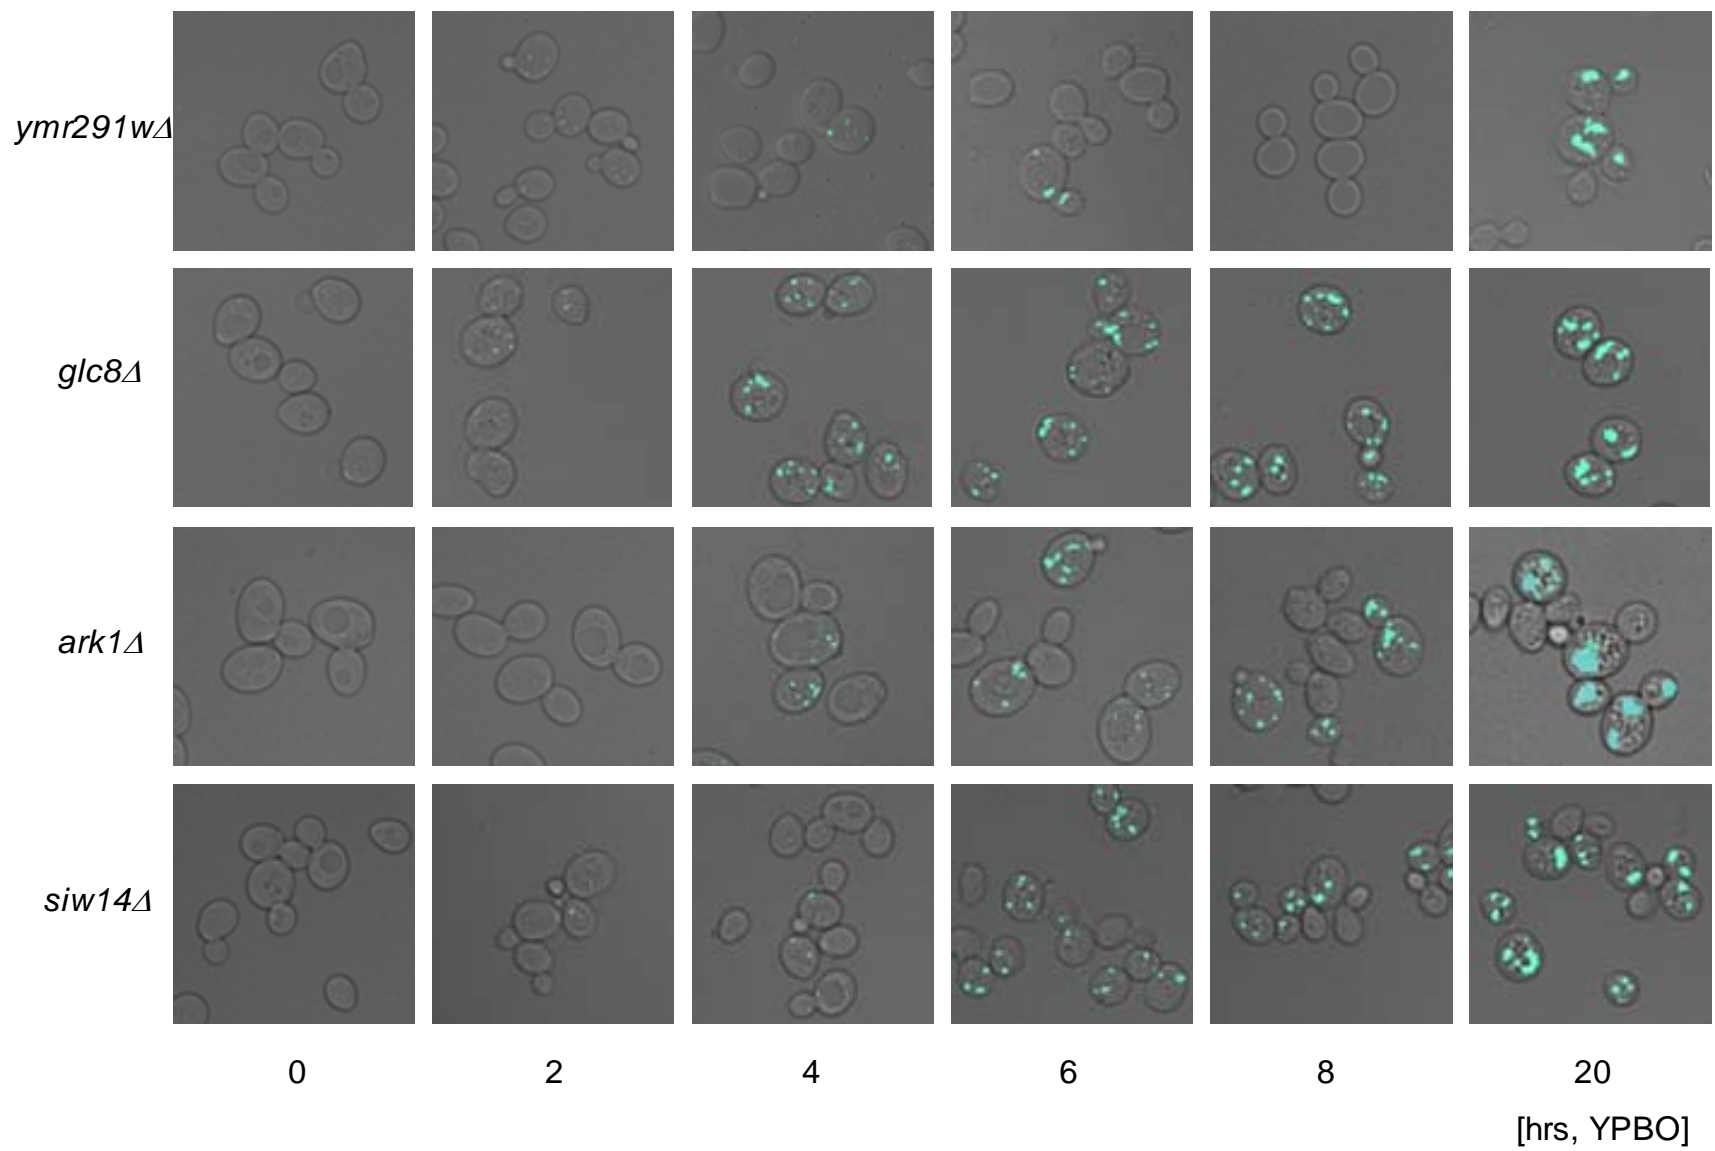

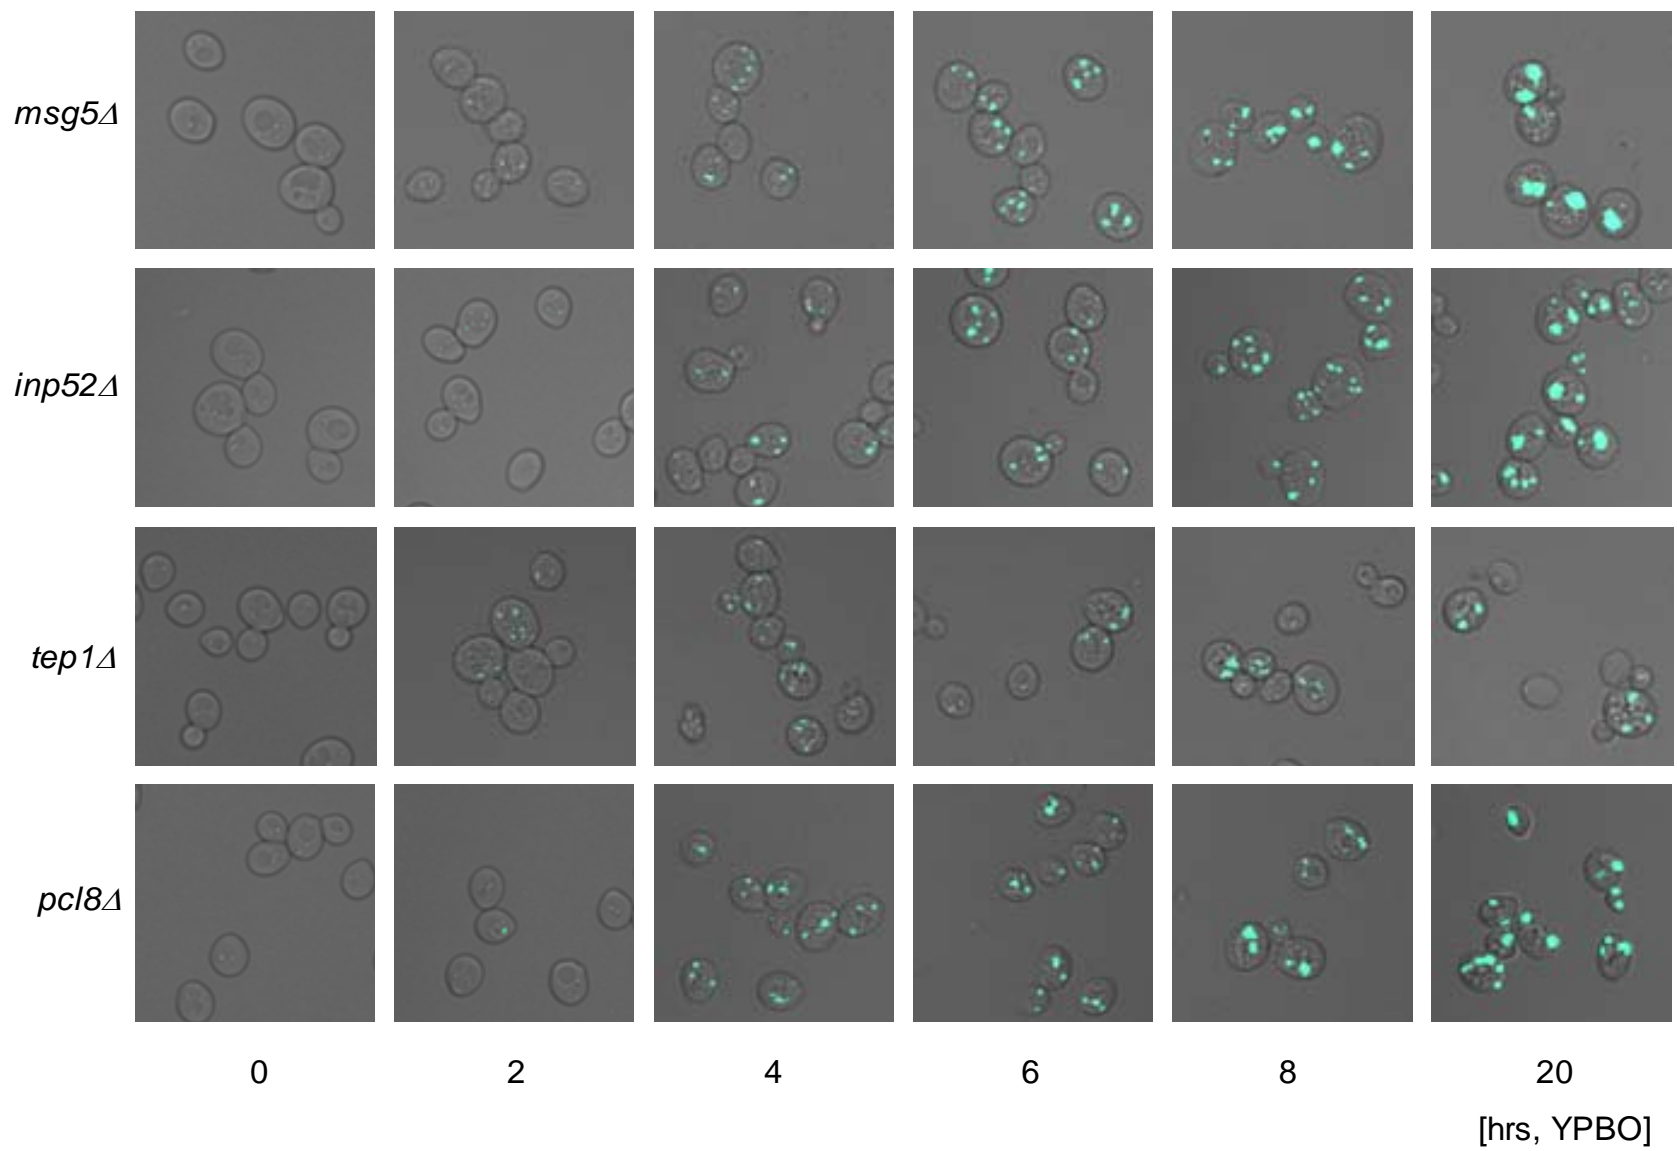

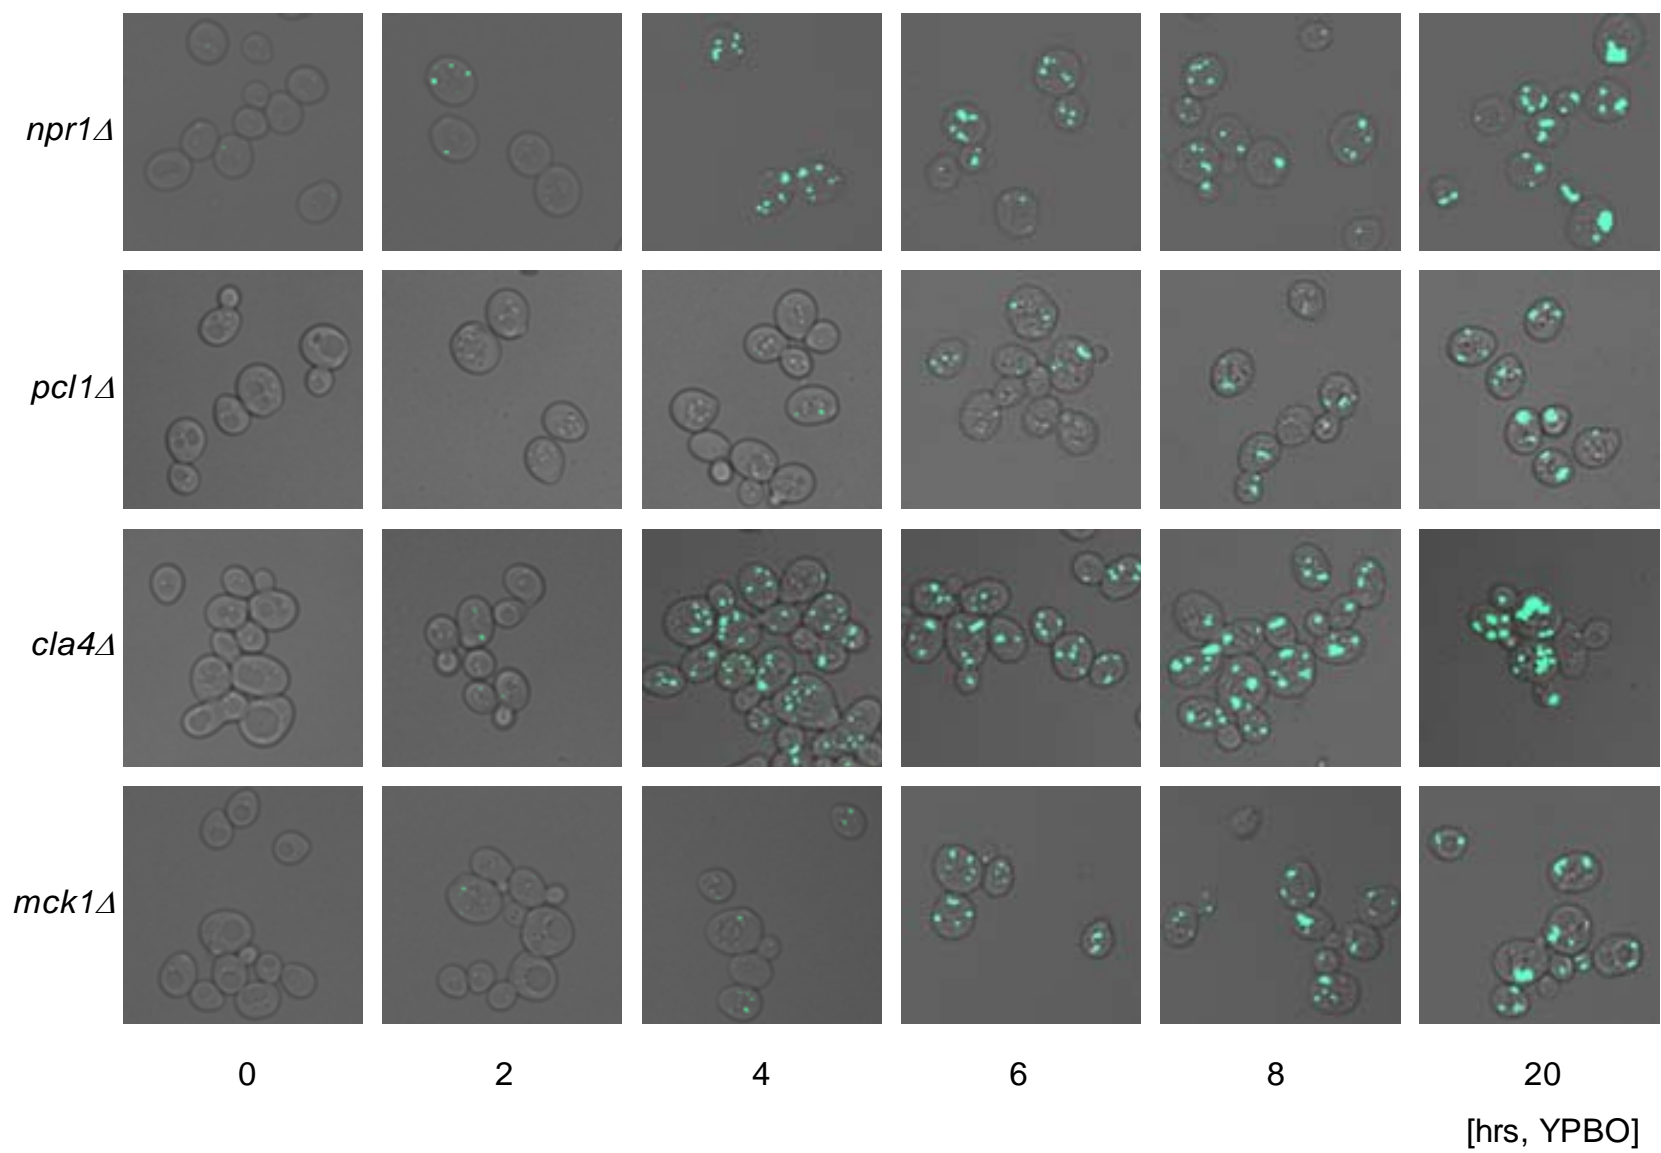

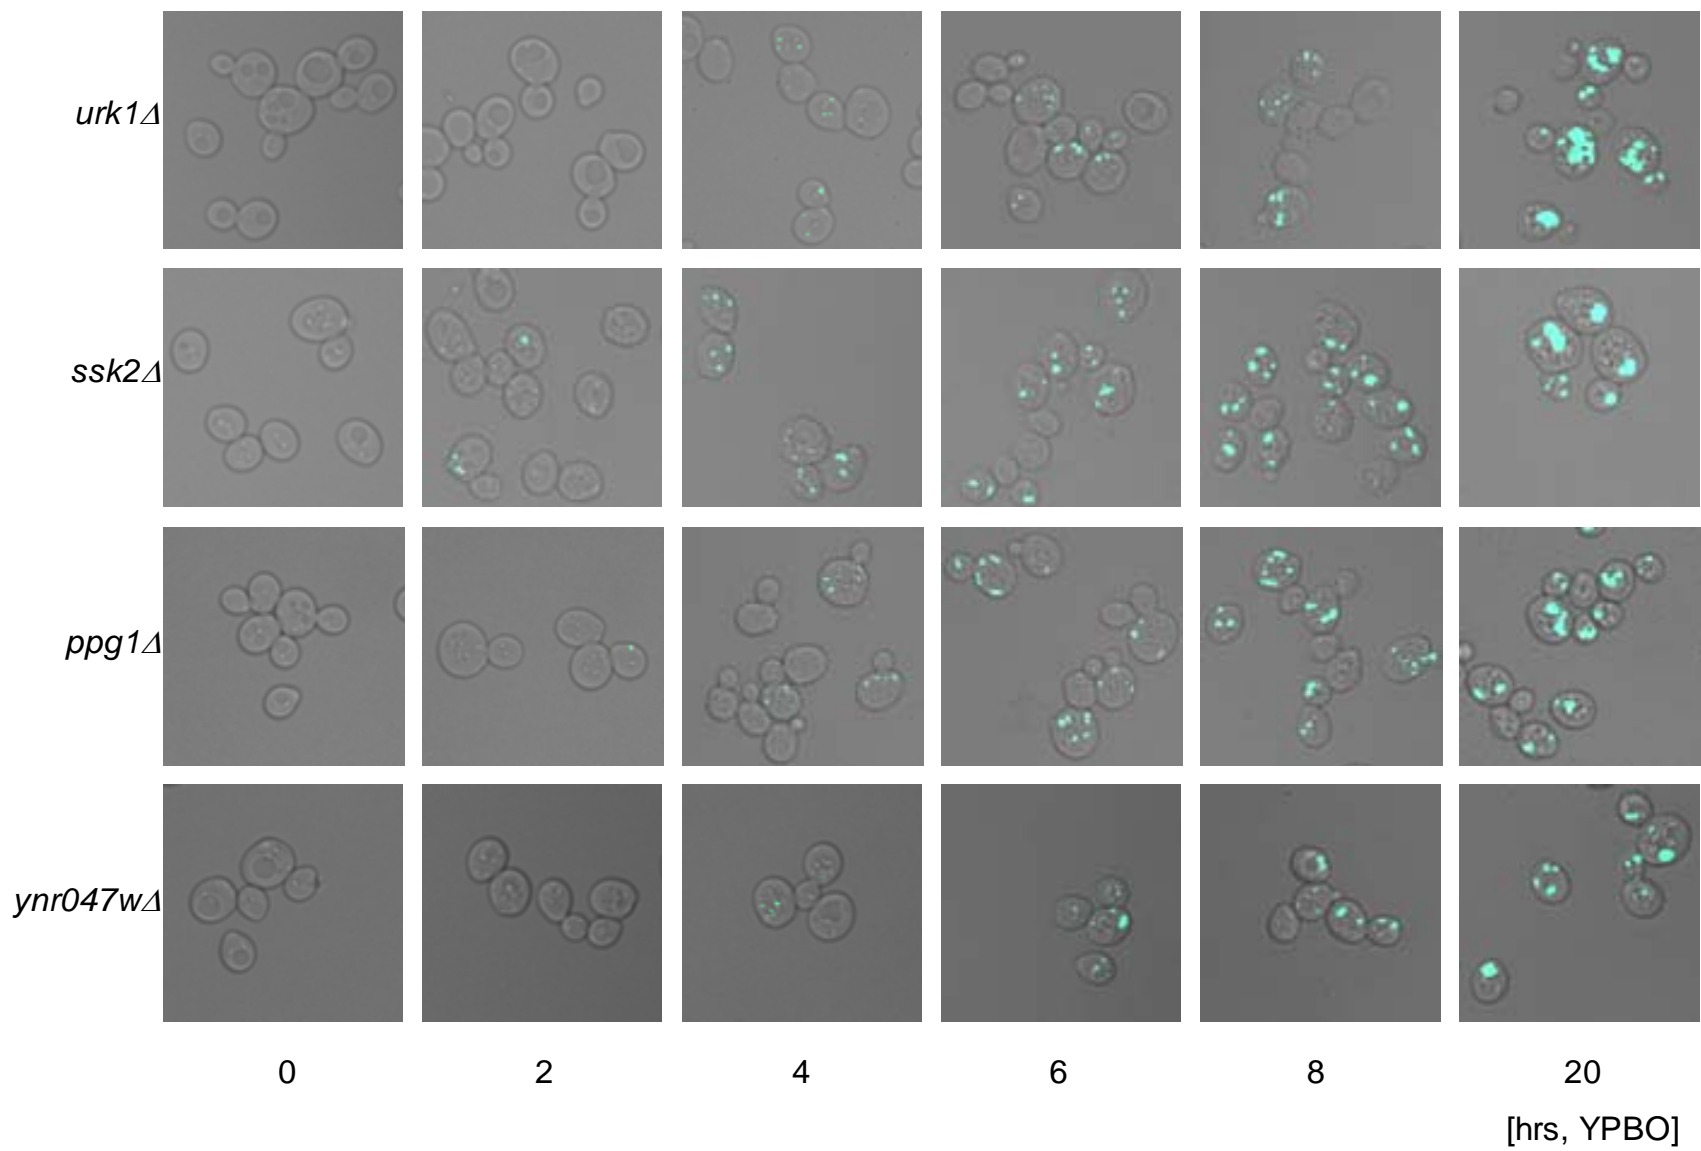

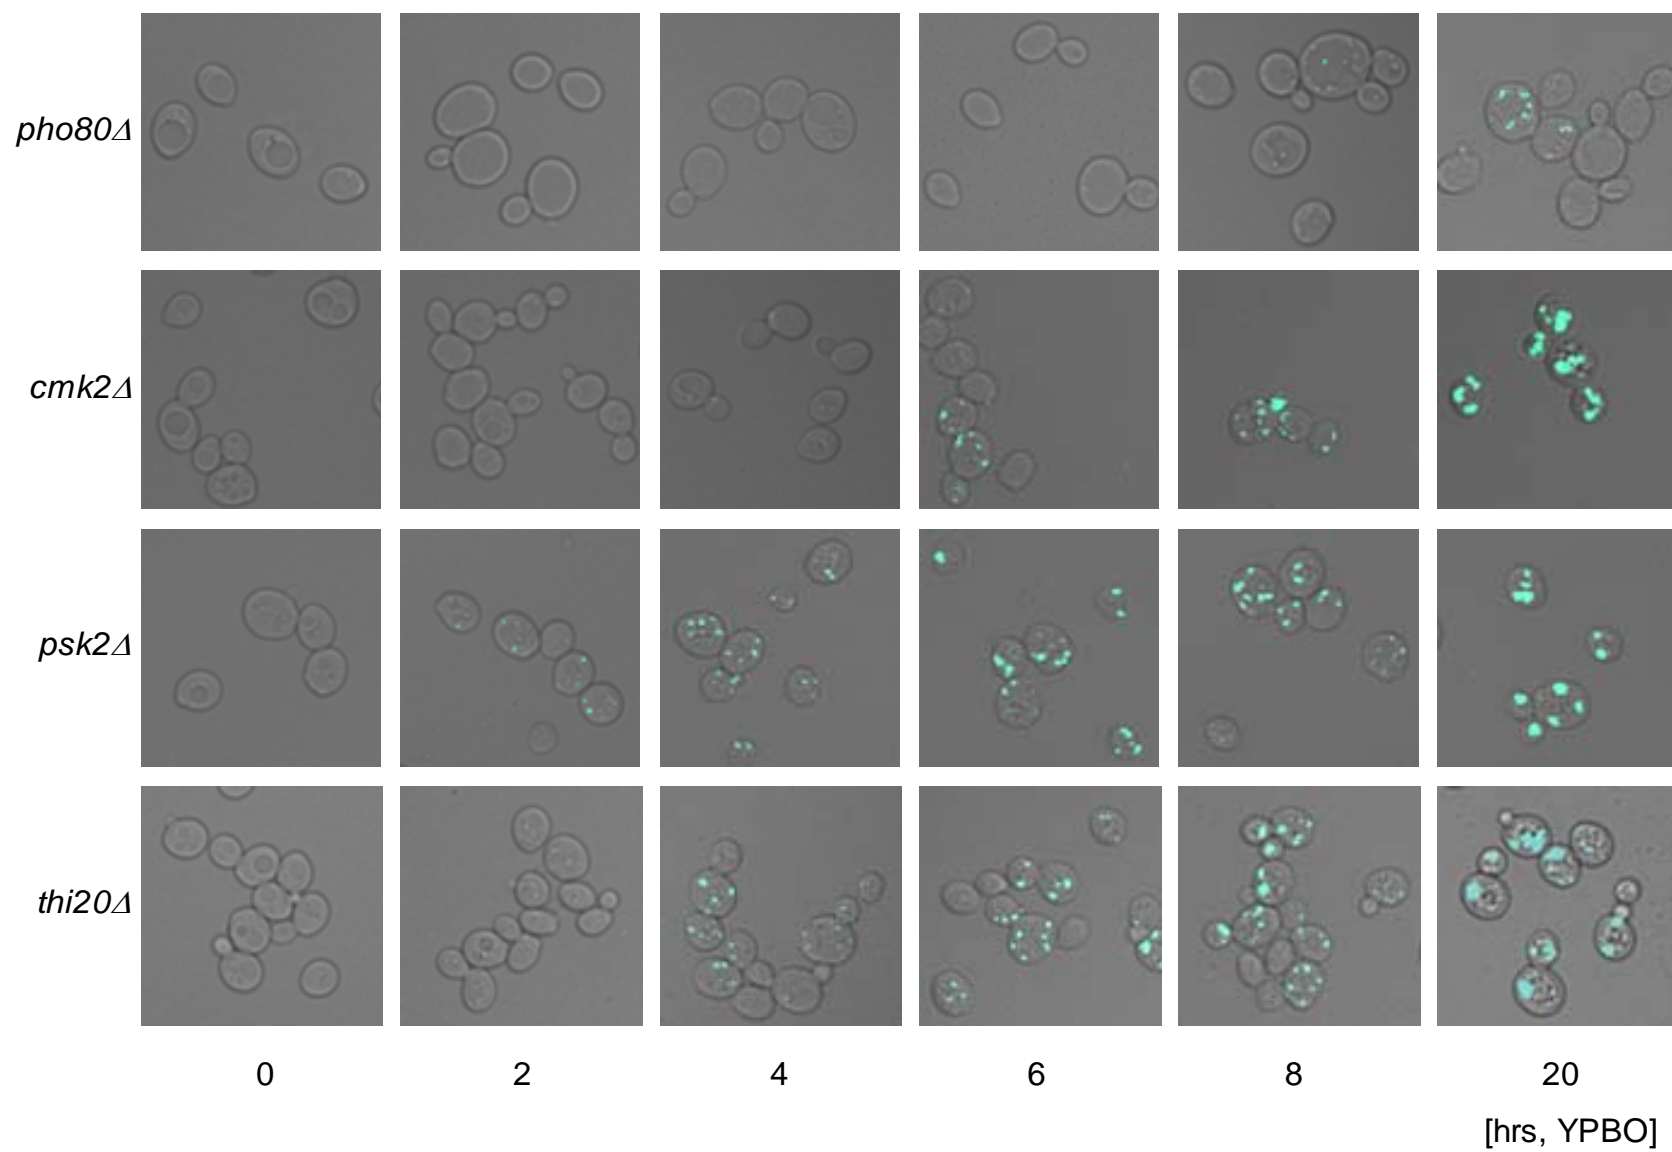

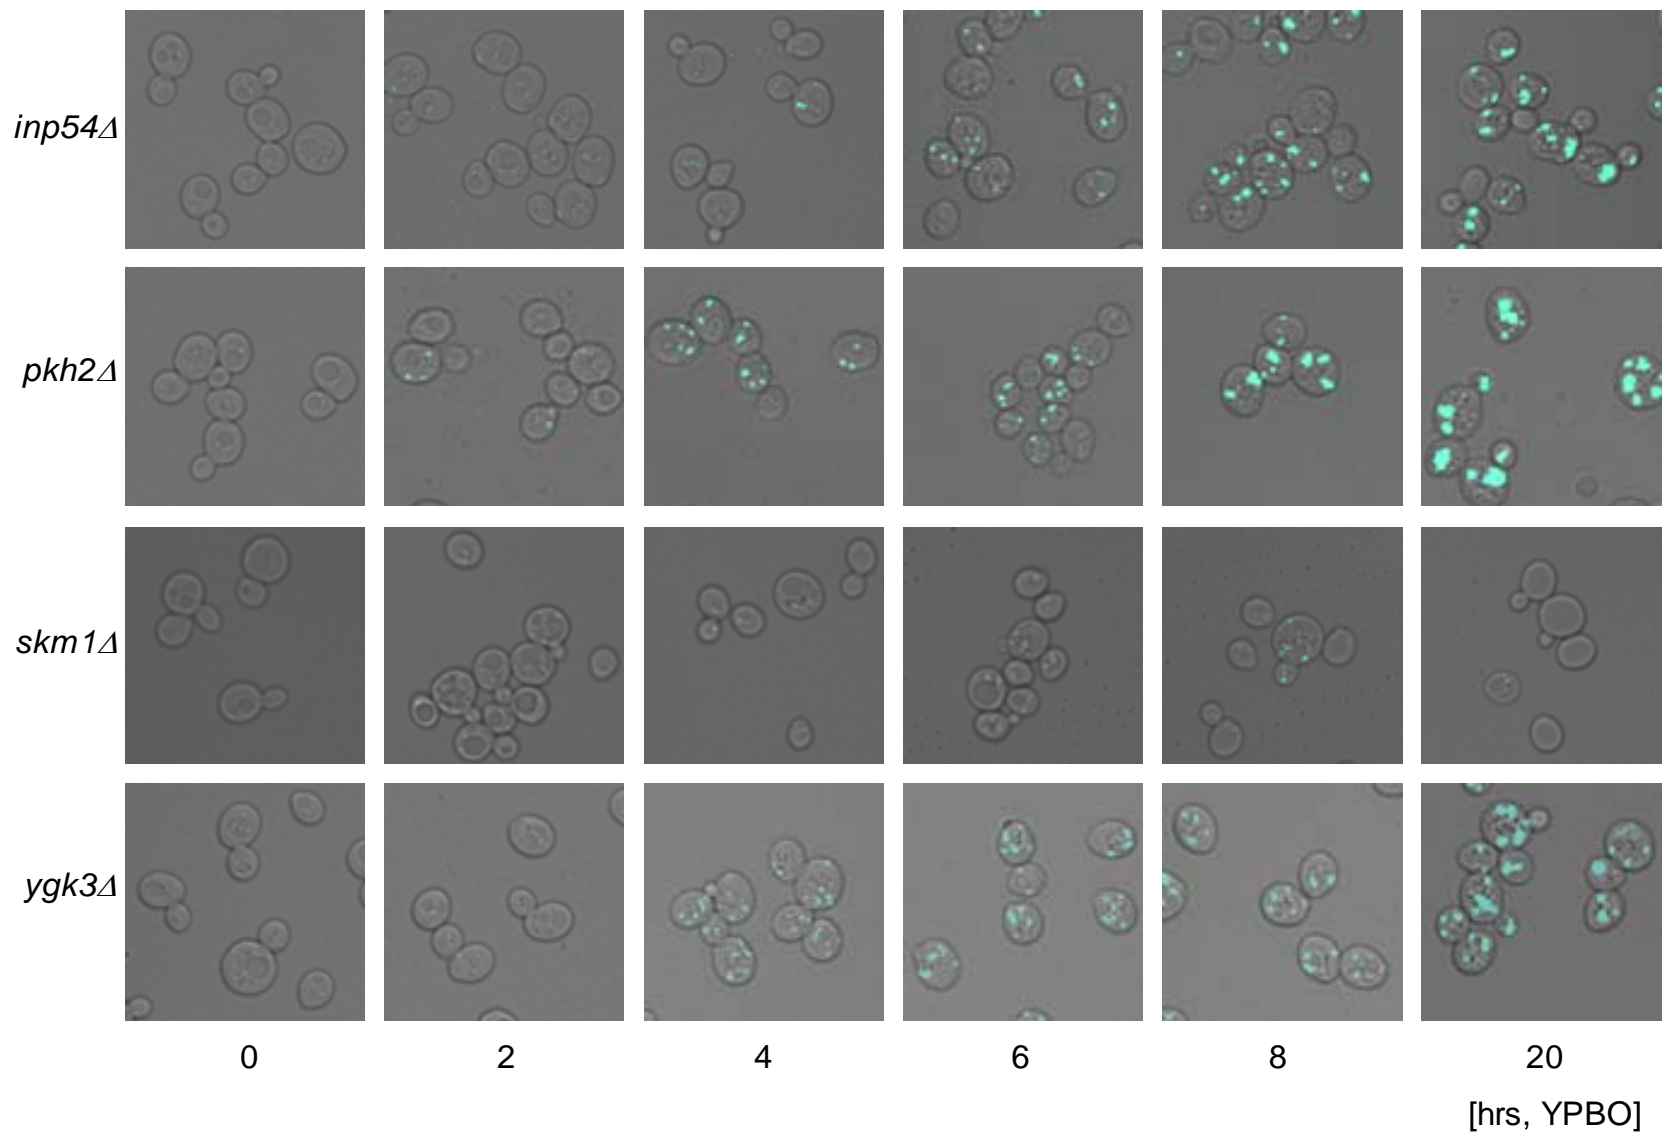



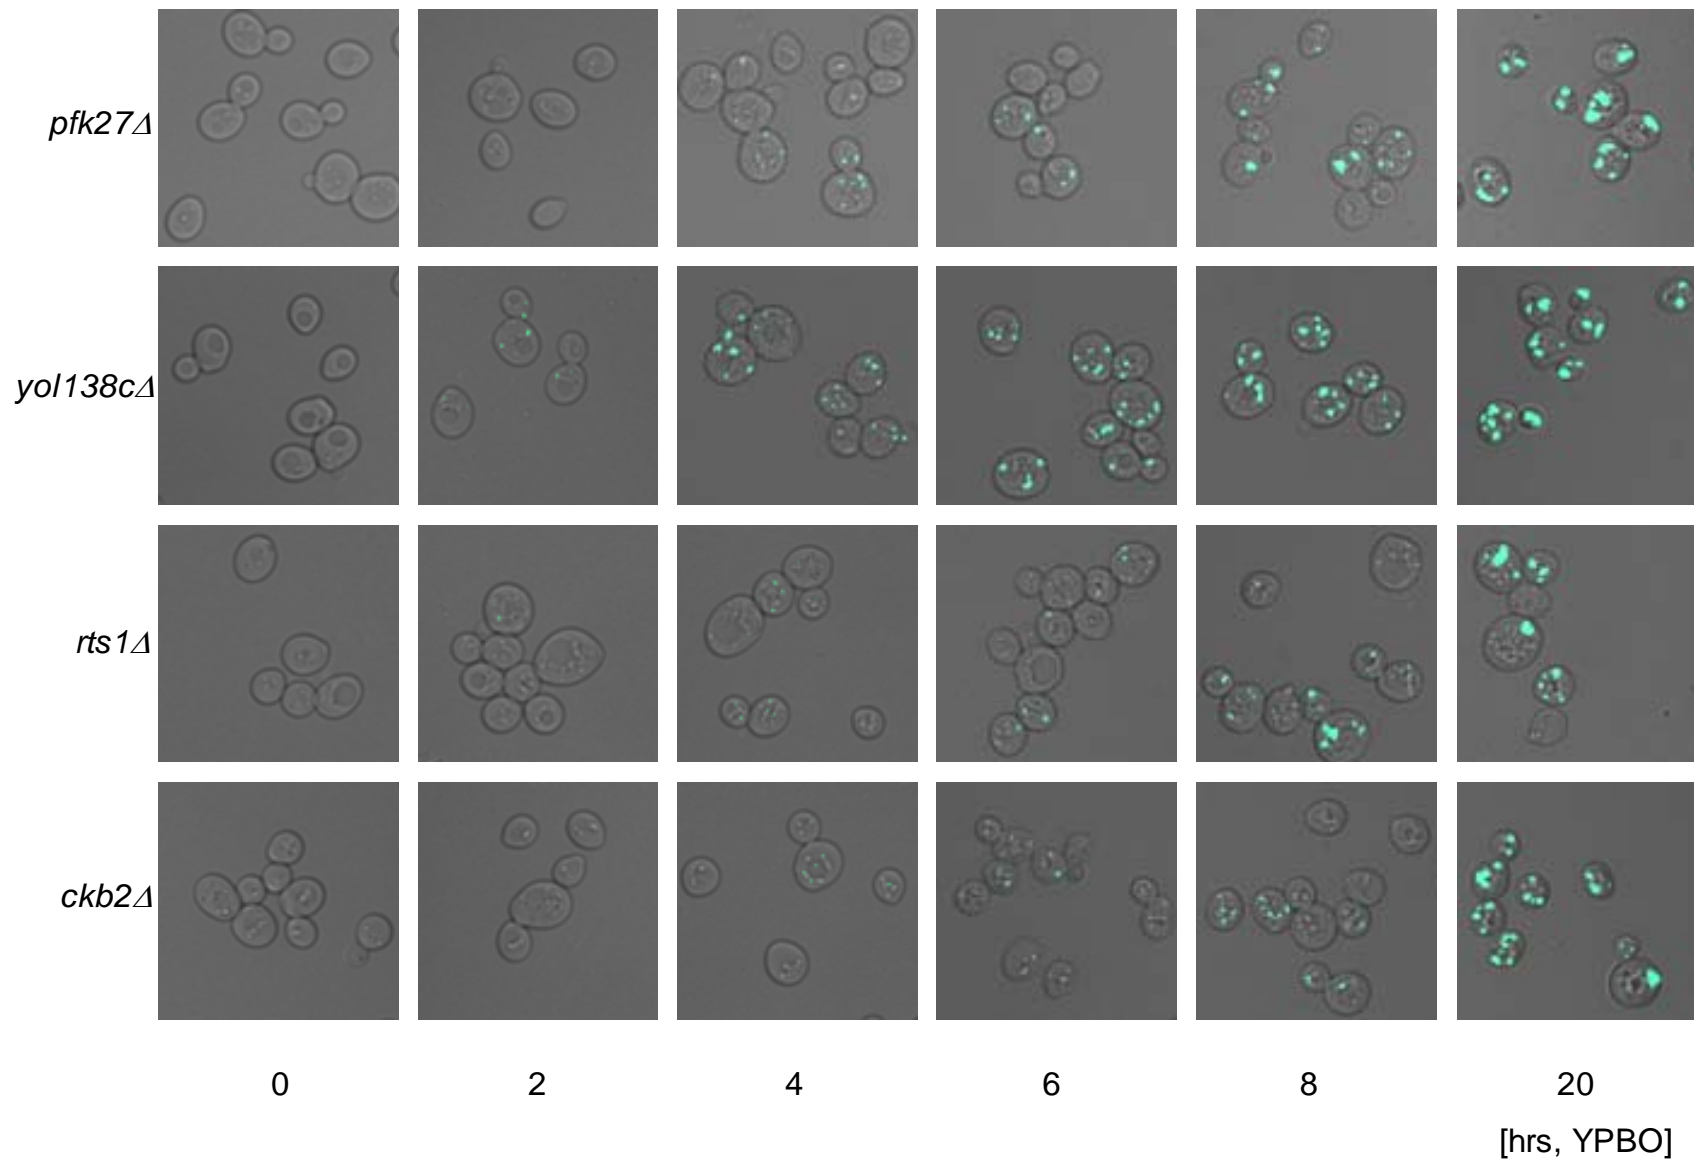

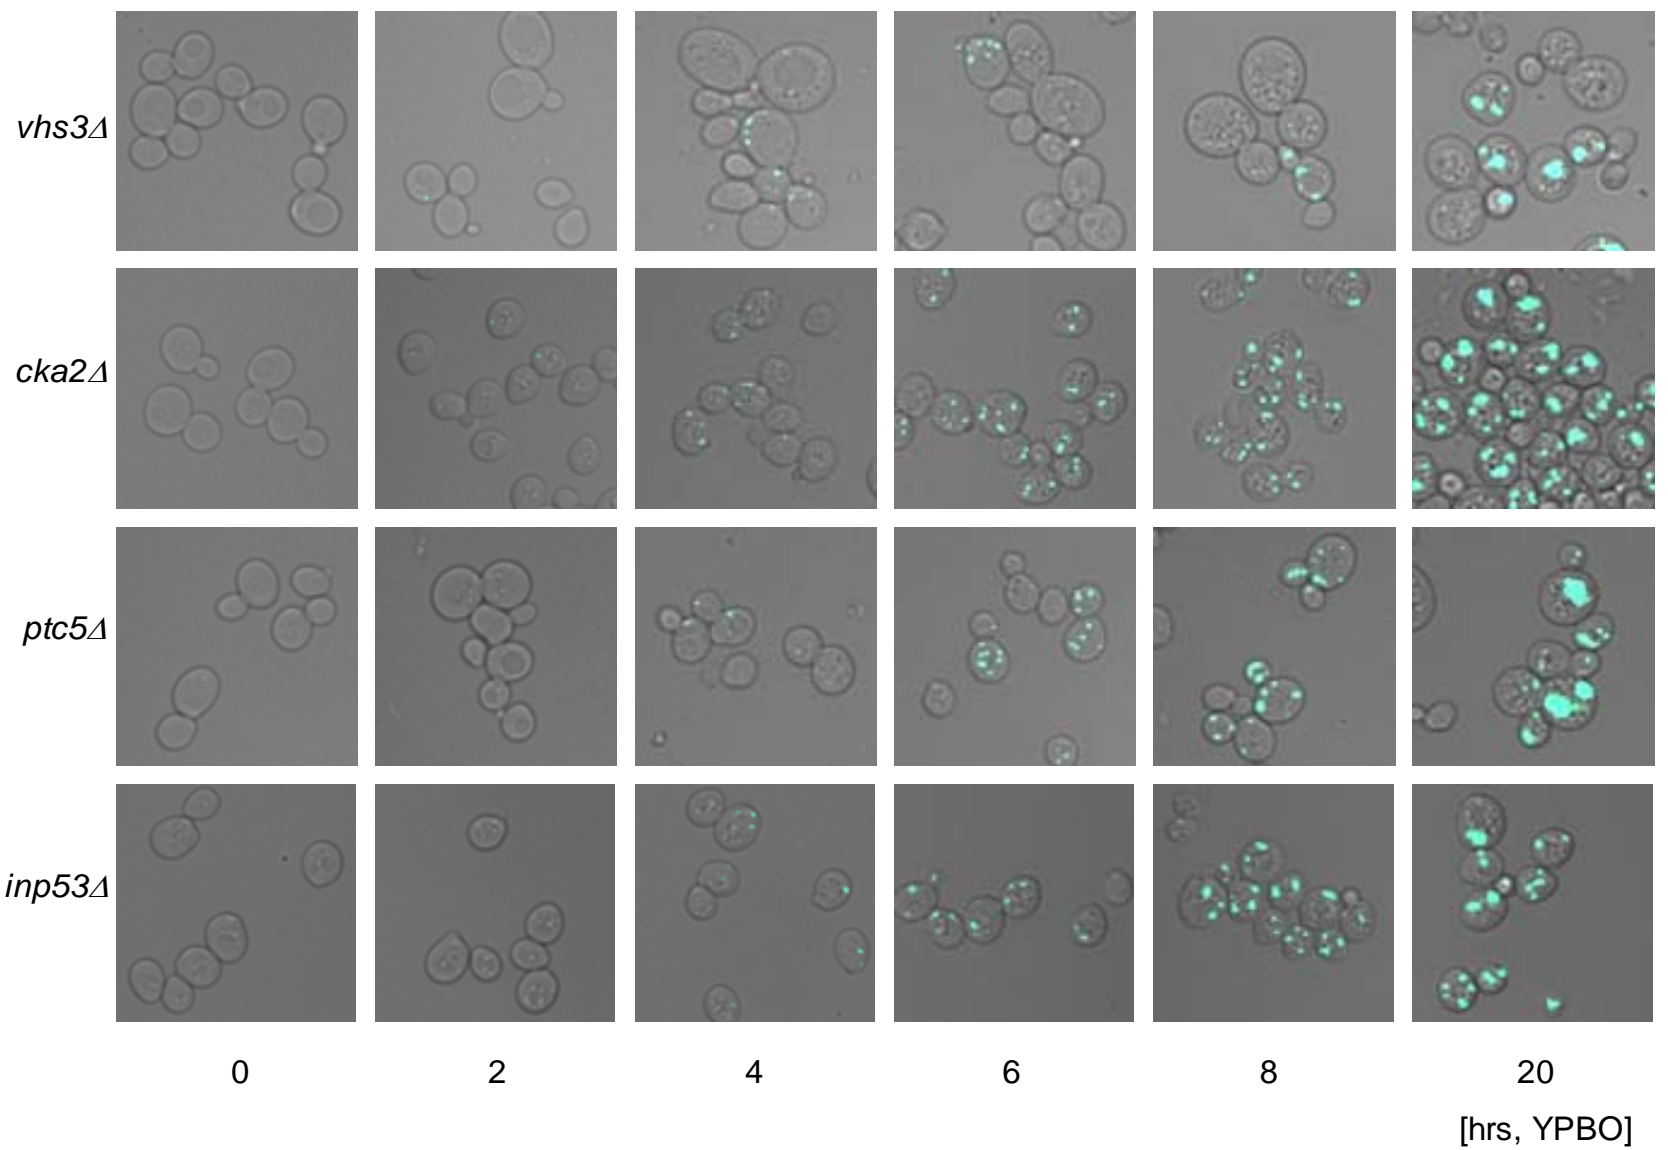

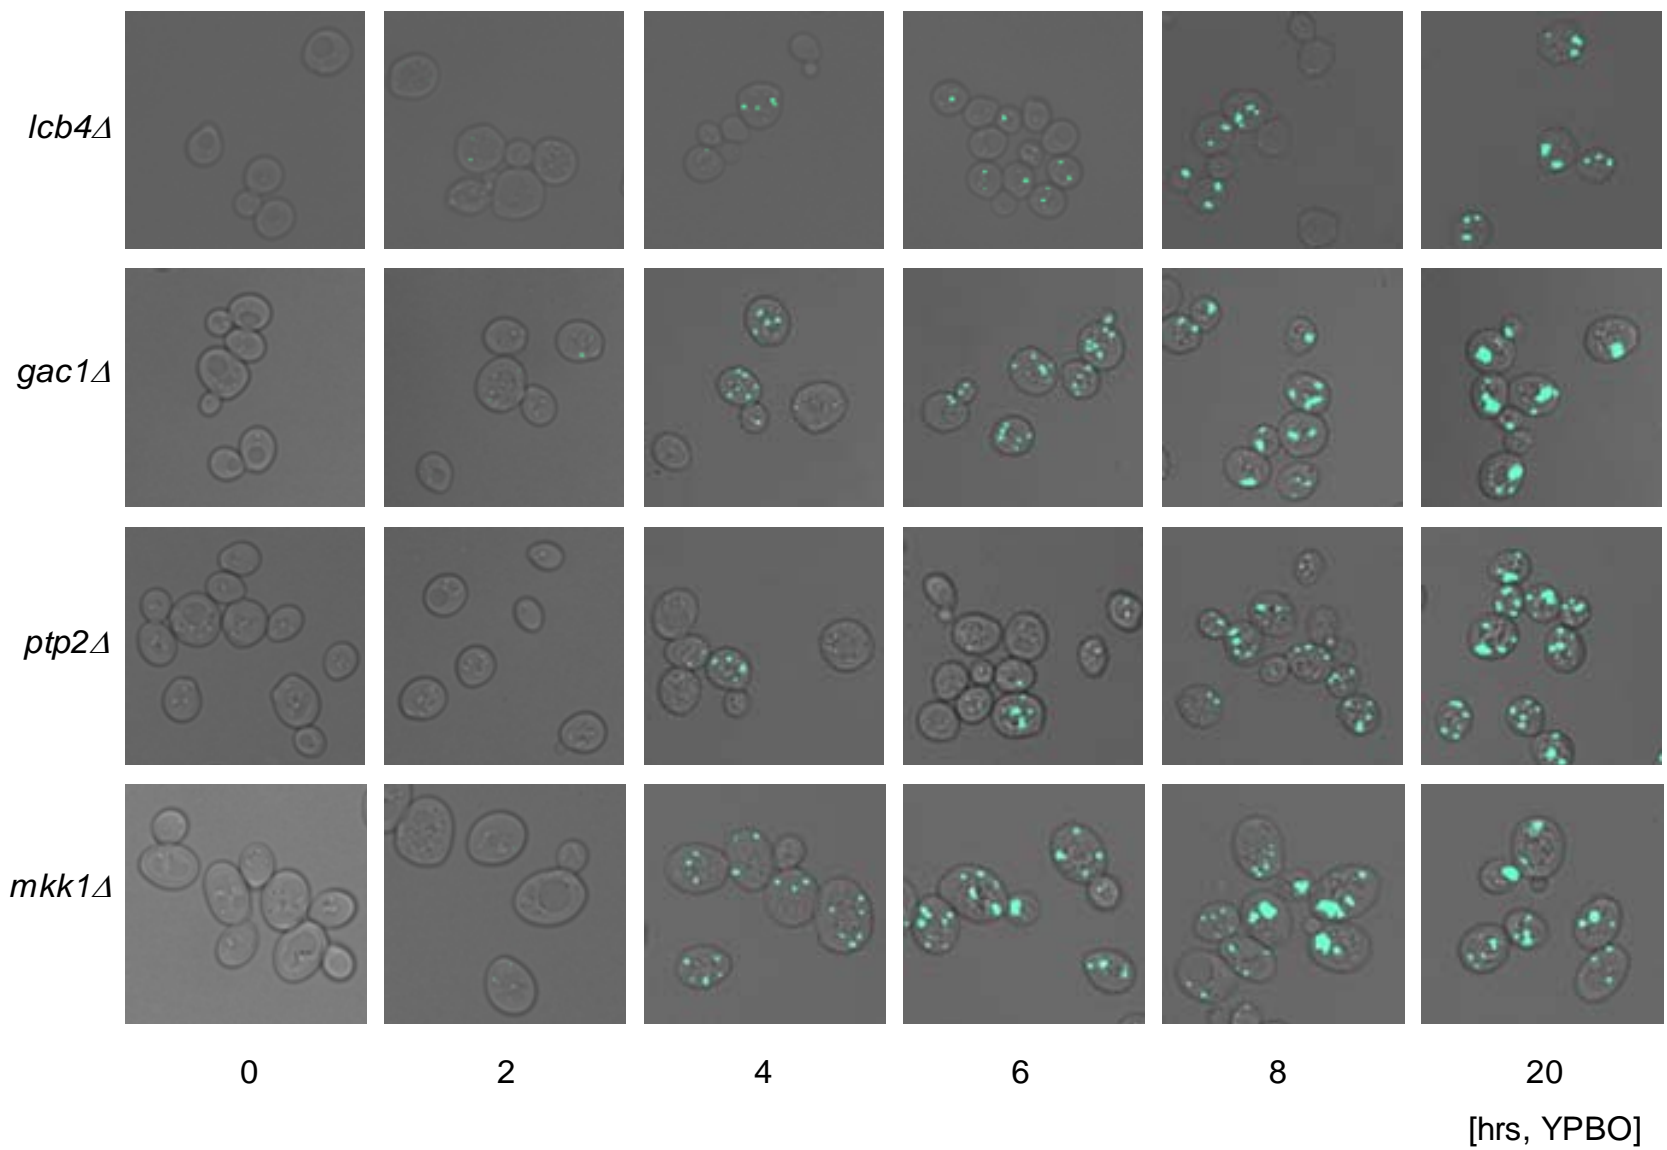



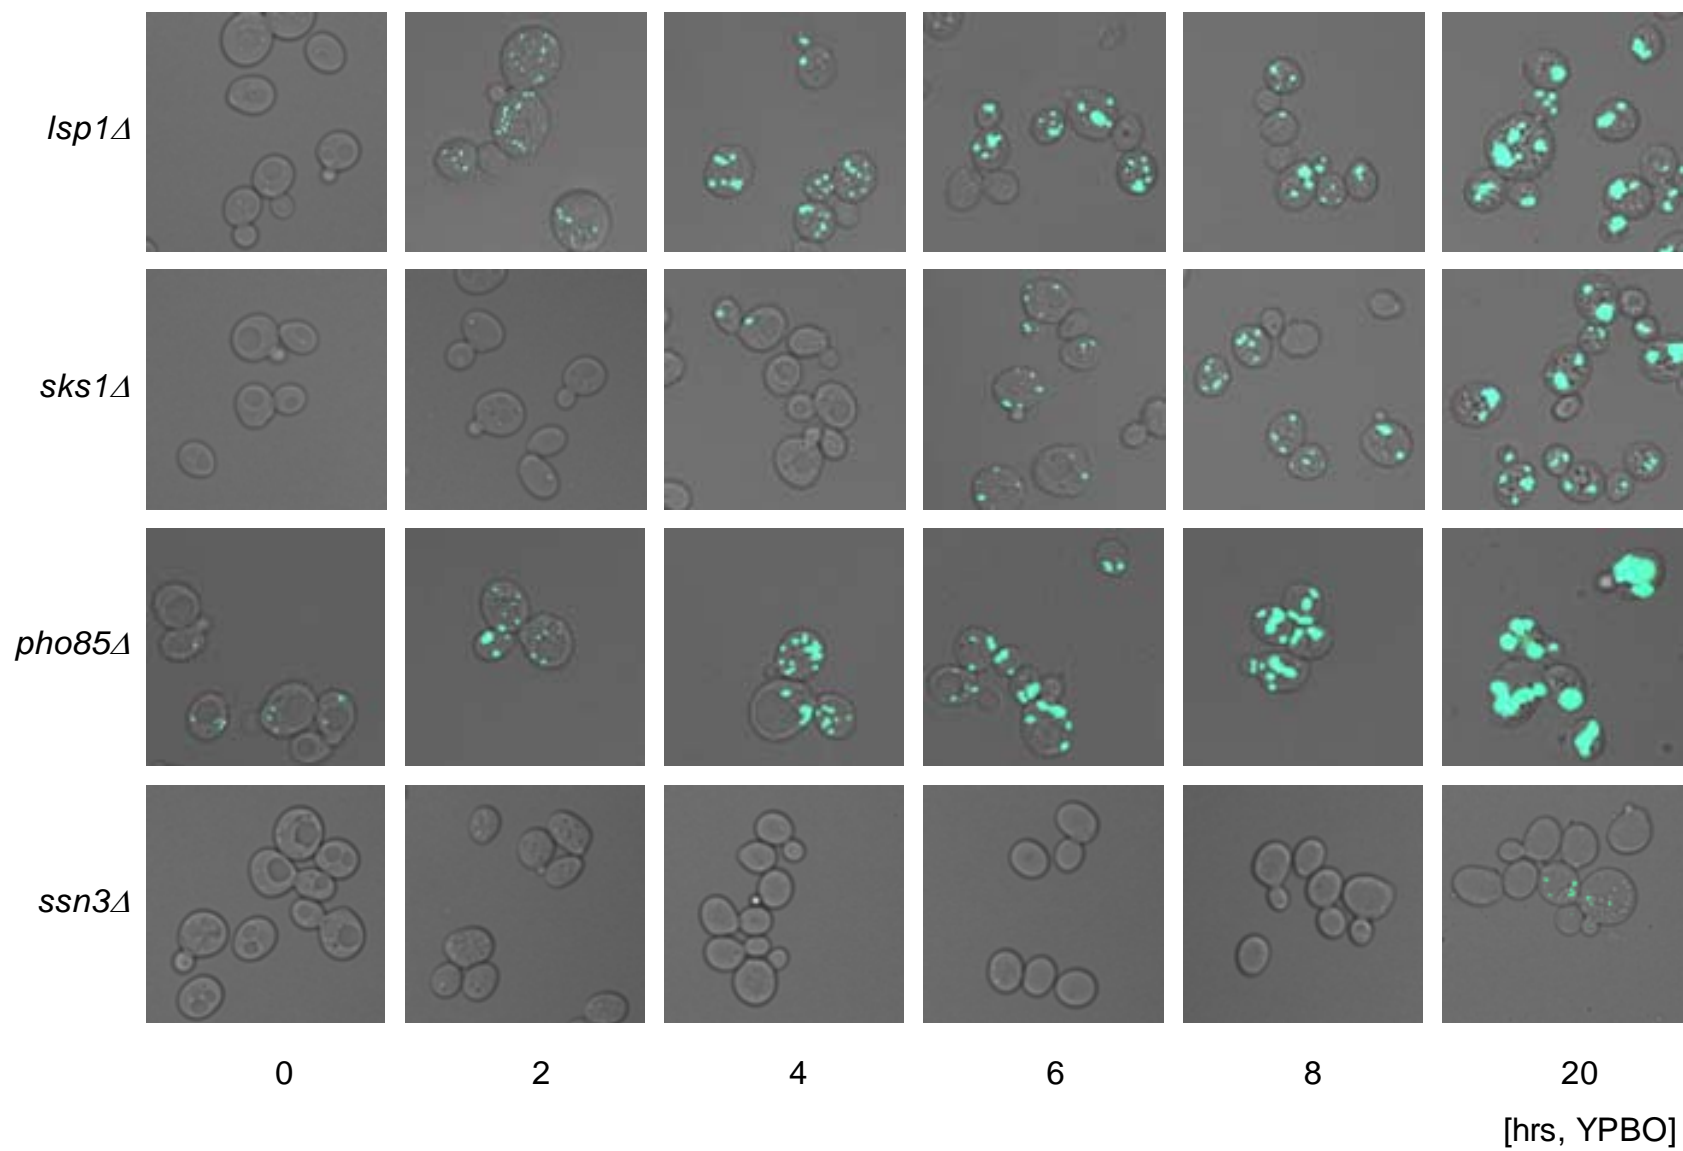

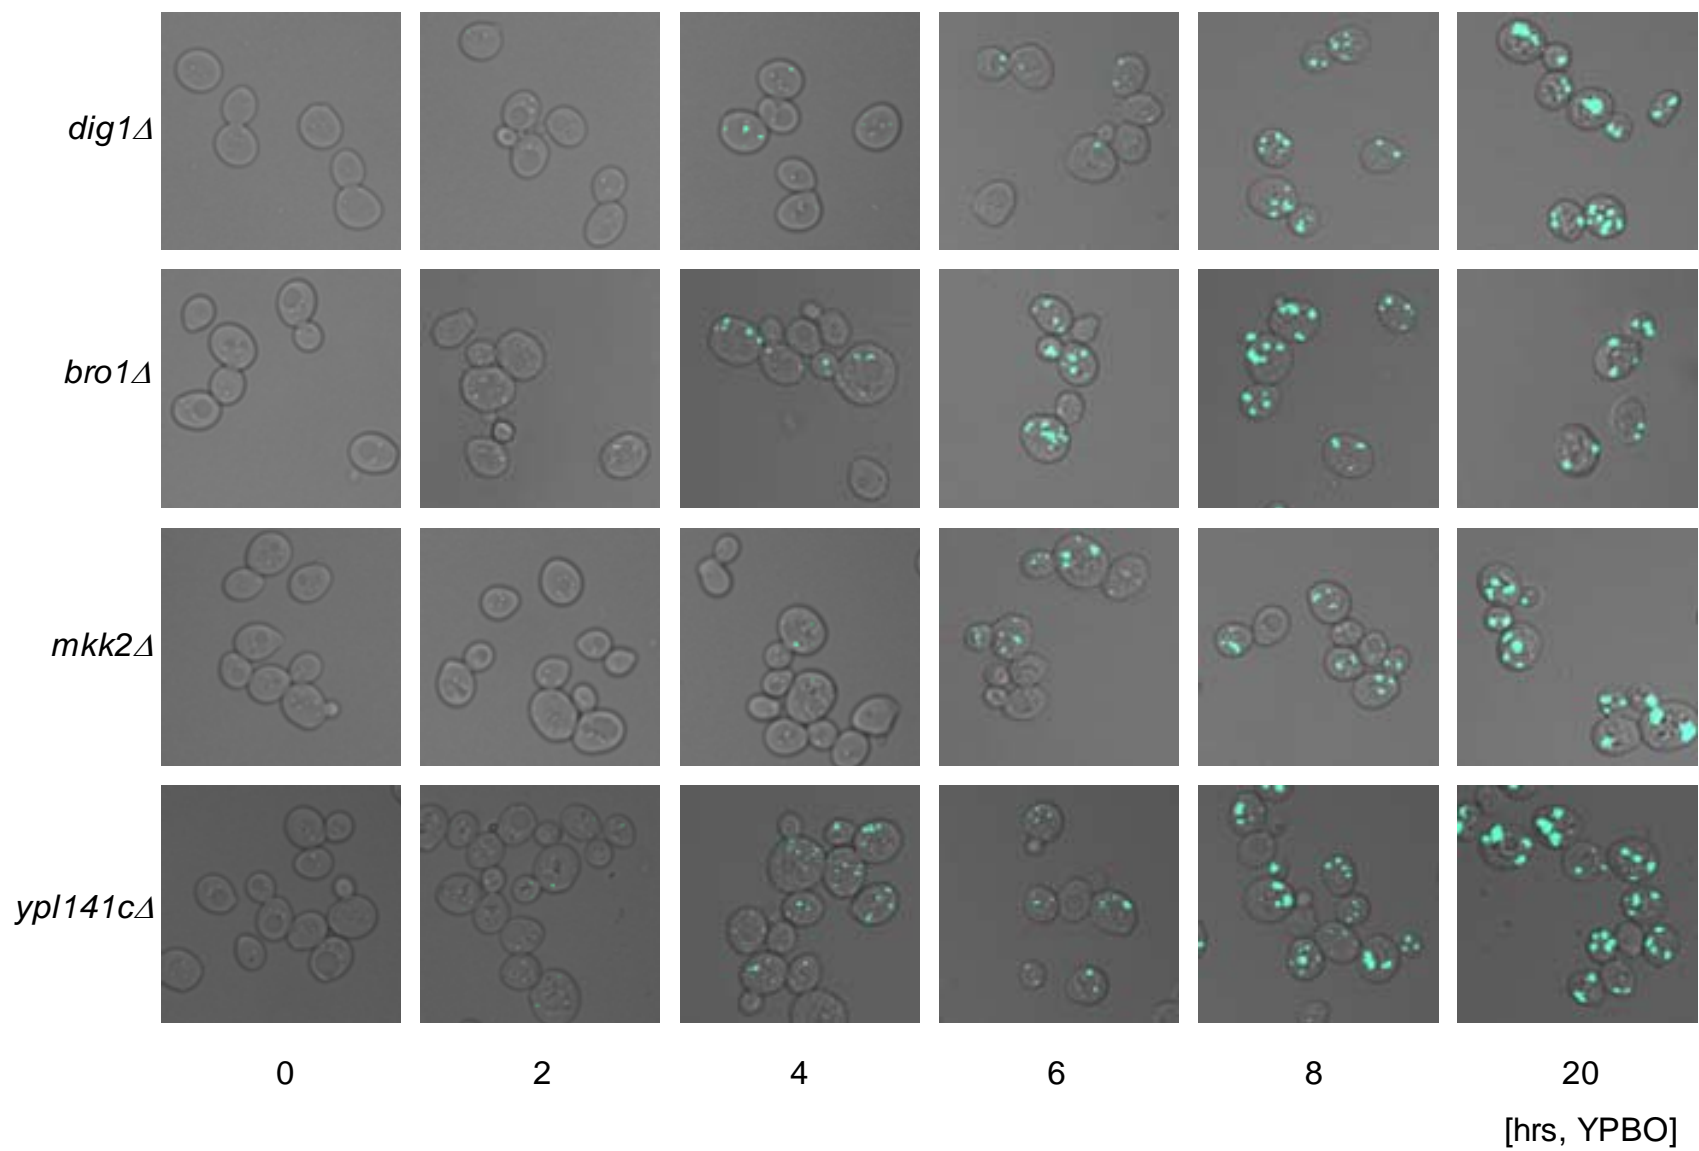

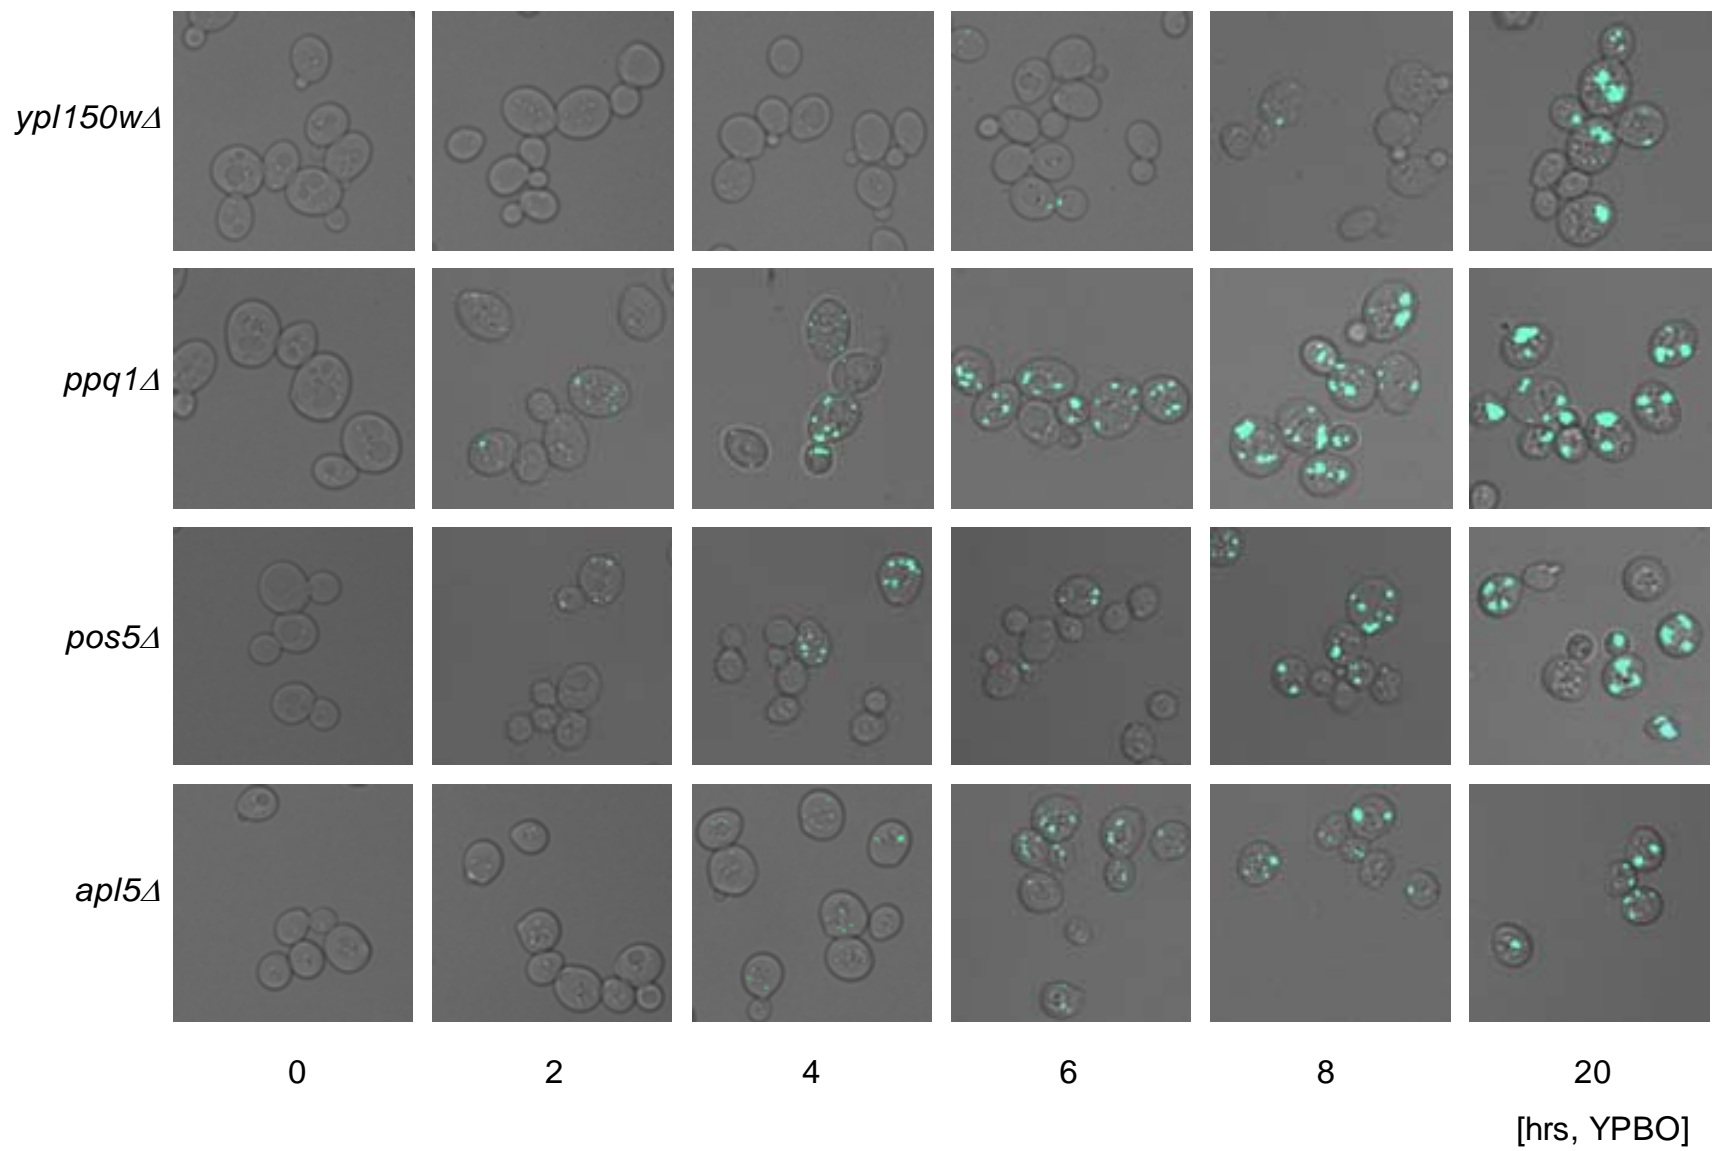

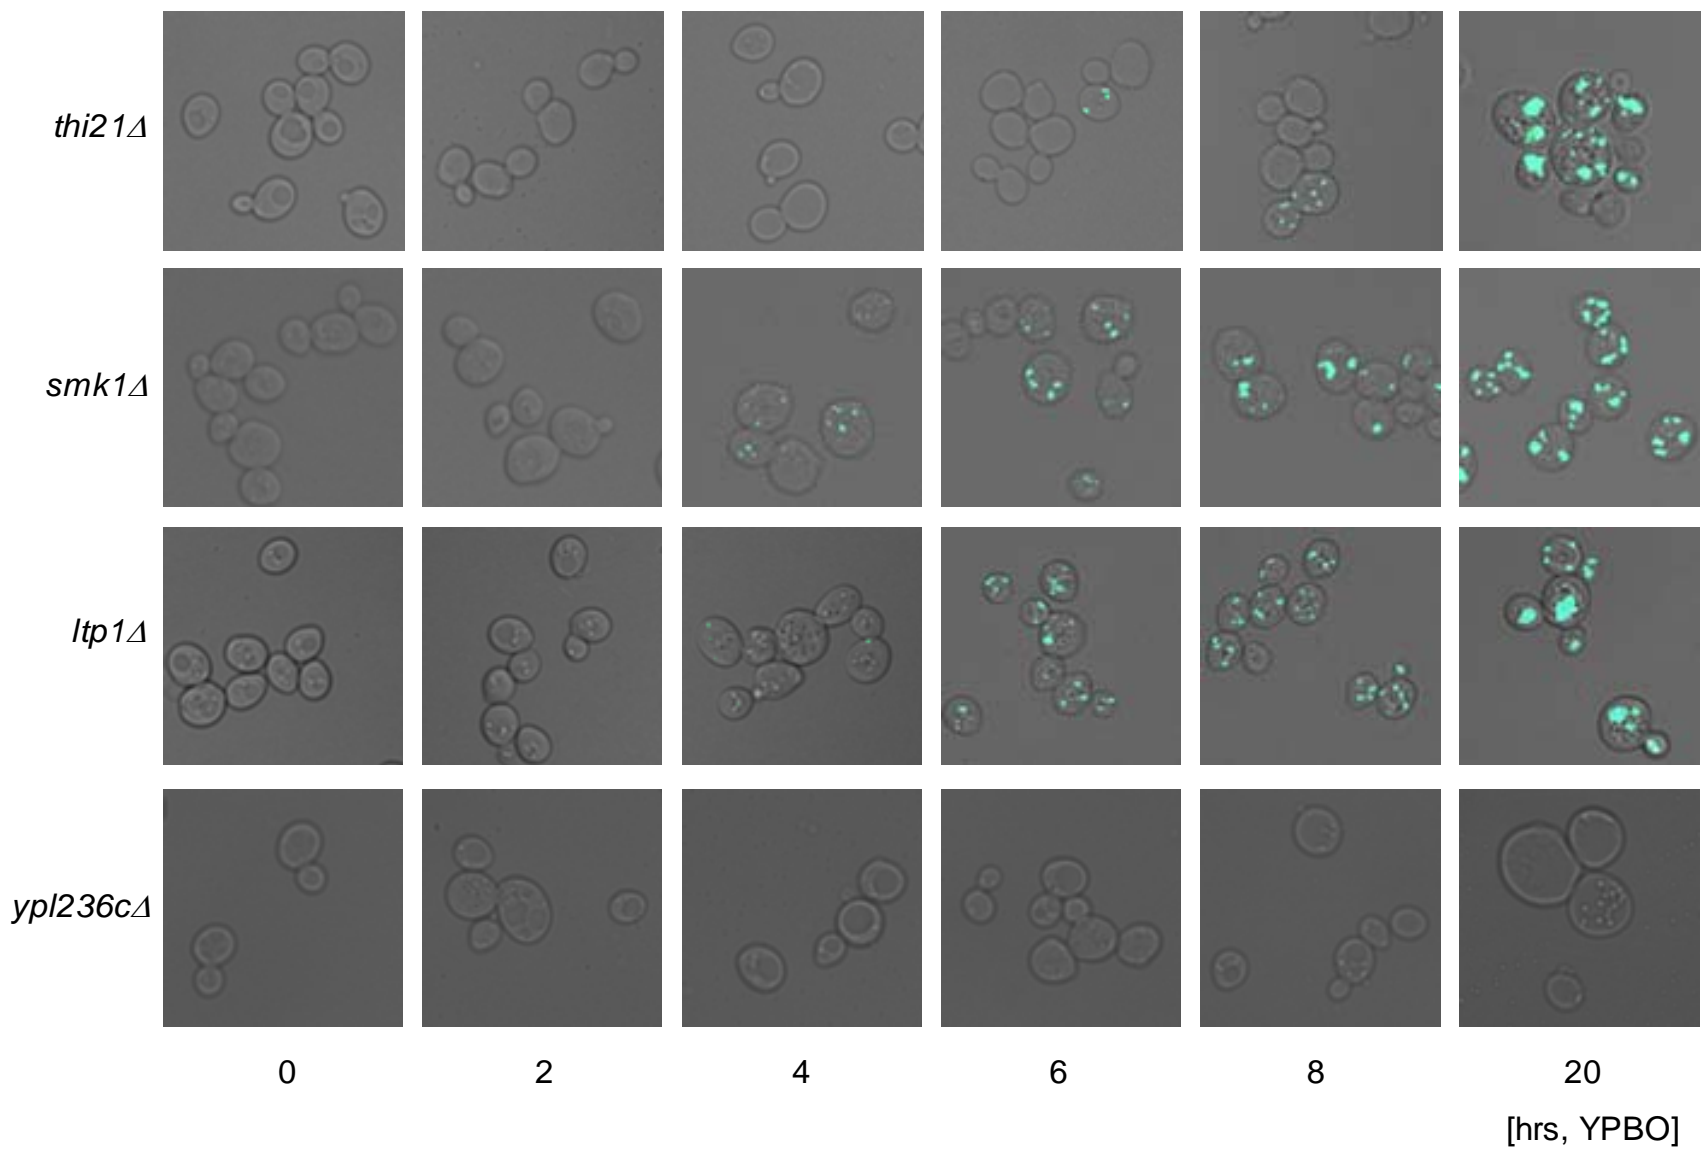



*dbf20Δ*

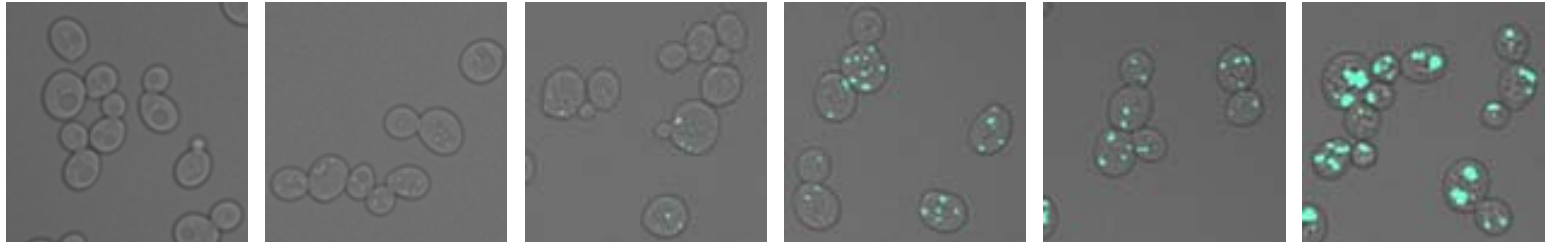

*thi22Δ*

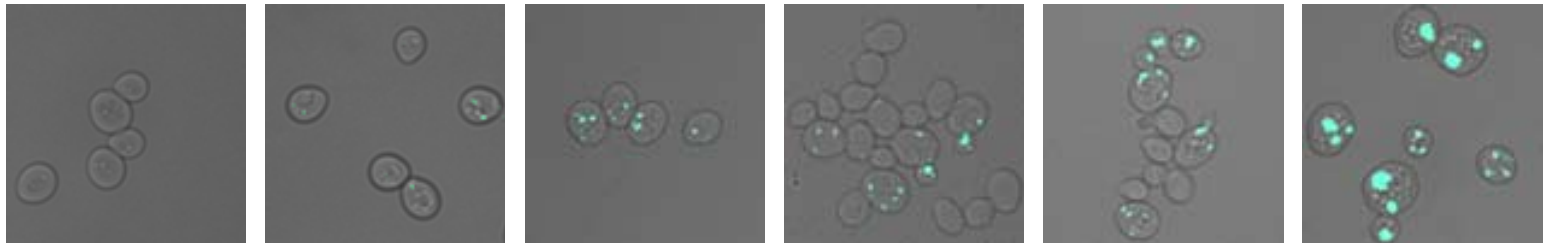

0

2

4

6

8

20

[hrs, YPBO]

Supplement: jcellbiol_jcb.200710009_5.pdf [file jcellbiol_jcb.200710009_5.pdf]
